# Supplementary material for: Paving the Way for Gene Silencing in Lepidoptera: Integrated Sequencing Data Unveil the Rnai Core Machinery of Leucoptera Coffeella.
Source: Preprints.org preprint supplement (doi:10.20944/preprints202208.0465.v1), 2022-08-29
Supplement: Supplementary file 3 [file supplementary]

## Sheet: GEN TRANSC PROT
g10932.t1	(pident:56.545) CAG9104957.1 unnamed protein product [Plutella xylostella]	(pident:56.54) unnamed protein product [Plutella xylostella]	Null	(pident:60.000) Full=Fanconi anemia group J protein homolog; Short=Protein FACJ; AltName: Full=ATP-dependent RNA helicase BRIP1; AltName: Full=BRCA1-associated C-terminal helicase 1; AltName: Full=BRCA1-interacting protein C-terminal helicase 1; Short=BRCA1-interacting protein 1 [Mus musculus]	GO:0005524(ATP binding)	IPR045028(Helicase superfamily 1/2, DinG/Rad3-like),IPR027417(P-loop containing nucleoside triphosphate hydrolase),IPR014013(Helicase superfamily 1/2, ATP-binding domain, DinG/Rad3-type)	Null	Null	Null	Null	Null	Pxyl023523.1 Fanconi anemia group J protein homolog OS=Mus musculus OX=10090 GN=Brip1 PE=2 SV=1	Null	TRINITY_GG_996_c9_g1_i4
g12953.t1	(pident:55.738) CAG9104965.1 unnamed protein product [Plutella xylostella]	(pident:55.67) unnamed protein product [Plutella xylostella]	Null	(pident:33.487) Full=Fanconi anemia group J protein homolog; Short=Protein FACJ; AltName: Full=ATP-dependent RNA helicase BRIP1 [Gallus gallus]	GO:0003677(DNA binding), GO:0003678(DNA helicase activity), GO:0005524(ATP binding), GO:0016818(hydrolase activity, acting on acid anhydrides, in phosphorus-containing anhydrides)	IPR045028(Helicase superfamily 1/2, DinG/Rad3-like),IPR027417(P-loop containing nucleoside triphosphate hydrolase),IPR014013(Helicase superfamily 1/2, ATP-binding domain, DinG/Rad3-type),IPR010614(DEAD2),IPR006554(Helicase-like, DEXD box c2 type),IPR002464(DNA/RNA helicase, ATP-dependent, DEAH-box type, conserved site)	PF06733(DEAD_2)	Null	Null	Null	Null	Pxyl023527.1 Fanconi anemia group J protein homolog OS=Gallus gallus OX=9031 GN=BRIP1 PE=2 SV=1	Null	TRINITY_GG_996_c9_g1_i4
g12957.t1	Null	Null	Null	Null	Null	Null	Null	Null	Null	Null	Null	Null	Null	TRINITY_GG_996_c9_g1_i4
g12961.t1	(pident:56.021) CAG9104957.1 unnamed protein product [Plutella xylostella]	(pident:54.31) unnamed protein product [Plutella xylostella]	Null	(pident:60.000) Full=Fanconi anemia group J protein homolog; Short=Protein FACJ; AltName: Full=ATP-dependent RNA helicase BRIP1; AltName: Full=BRCA1-associated C-terminal helicase 1; AltName: Full=BRCA1-interacting protein C-terminal helicase 1; Short=BRCA1-interacting protein 1 [Mus musculus]	GO:0005524(ATP binding)	IPR045028(Helicase superfamily 1/2, DinG/Rad3-like),IPR027417(P-loop containing nucleoside triphosphate hydrolase),IPR014013(Helicase superfamily 1/2, ATP-binding domain, DinG/Rad3-type)	Null	Null	Null	Null	Null	Pxyl023523.1 Fanconi anemia group J protein homolog OS=Mus musculus OX=10090 GN=Brip1 PE=2 SV=1	Null	TRINITY_GG_996_c9_g1_i4
g12949.t1	(pident:57.328) CAG5047658.1 unnamed protein product [Parnassius apollo]	(pident:60.04) hypothetical protein evm_001425 [Chilo suppressalis]	Null	(pident:57.944) Full=Zinc finger protein 593 [Xenopus tropicalis]	GO:0000166(nucleotide binding), GO:0003676(nucleic acid binding), GO:0004812(aminoacyl-tRNA ligase activity), GO:0004828(serine-tRNA ligase activity), GO:0005524(ATP binding), GO:0006418(tRNA aminoacylation for protein translation), GO:0006434(seryl-tRNA aminoacylation), GO:0008270(zinc ion binding)	IPR045864(Class II Aminoacyl-tRNA synthetase/Biotinyl protein ligase (BPL) and lipoyl protein ligase (LPL)),IPR036236(Zinc finger C2H2 superfamily),IPR022755(Zinc finger, double-stranded RNA binding),IPR013087(Zinc finger C2H2-type),IPR006195(Aminoacyl-tRNA synthetase, class II),IPR003604(Matrin/U1-C-like, C2H2-type zinc finger),IPR002317(Serine-tRNA ligase, type1),IPR002314(Aminoacyl-tRNA synthe…	PF00587(tRNA synthetase class II core domain (G, H, P, S and T)), PF12171(Zinc-finger double-stranded RNA-binding)	Null	Null	Null	Null	Csup006074.1 Serine--tRNA synthetase-like protein Slimp OS=Drosophila melanogaster OX=7227 GN=Slimp PE=1 SV=1	Null	TRINITY_GG_996_c8_g1_i1
g6915.t1	(pident:58.034) CAG5047658.1 unnamed protein product [Parnassius apollo]	(pident:60.45) hypothetical protein evm_001425 [Chilo suppressalis]	Null	(pident:57.944) Full=Zinc finger protein 593 [Xenopus tropicalis]	GO:0000166(nucleotide binding), GO:0003676(nucleic acid binding), GO:0004828(serine-tRNA ligase activity), GO:0005524(ATP binding), GO:0006434(seryl-tRNA aminoacylation), GO:0008270(zinc ion binding)	IPR045864(Class II Aminoacyl-tRNA synthetase/Biotinyl protein ligase (BPL) and lipoyl protein ligase (LPL)),IPR036236(Zinc finger C2H2 superfamily),IPR022755(Zinc finger, double-stranded RNA binding),IPR013087(Zinc finger C2H2-type),IPR003604(Matrin/U1-C-like, C2H2-type zinc finger),IPR002317(Serine-tRNA ligase, type1)	PF12171(Zinc-finger double-stranded RNA-binding)	Null	Null	Null	Null	Csup006074.1 Serine--tRNA synthetase-like protein Slimp OS=Drosophila melanogaster OX=7227 GN=Slimp PE=1 SV=1	Null	TRINITY_GG_996_c8_g1_i1
g12947.t1	(pident:82.295) CAG5047692.1 unnamed protein product [Parnassius apollo]	(pident:83.77) ubiquitin fusion degradation protein 1 homolog [Galleria mellonella]	(pident:40.86) ubiquitin fusion degradation UFD1 family protein, partial [Citrobacter sp. ASV29]	(pident:58.805) Full=Ubiquitin fusion degradation protein 1 homolog; Short=UB fusion protein 1 [Drosophila melanogaster]	GO:0006511(ubiquitin-dependent protein catabolic process)	IPR042299(Ufd1-like, Nn domain),IPR004854(Ubiquitin fusion degradation protein Ufd1-like)	PF03152(Ubiquitin fusion degradation protein UFD1)	Null	2YUJ_A Solution structure of human ubiquitin fusion degradation protein 1 homolog UFD1 [Homo sapiens]	Null	Null	Gmel010165.1 Ubiquitin fusion degradation protein 1 homolog OS=Drosophila melanogaster OX=7227 GN=Ufd1-like PE=2 SV=1	Null	TRINITY_GG_996_c7_g1_i2
g12947.t2	(pident:82.410) CAG5047690.1 unnamed protein product [Parnassius apollo]	(pident:83.92) ubiquitin fusion degradation protein 1 homolog [Galleria mellonella]	(pident:40.86) ubiquitin fusion degradation UFD1 family protein, partial [Citrobacter sp. ASV29]	(pident:58.824) Full=Ubiquitin fusion degradation protein 1 homolog; Short=UB fusion protein 1 [Drosophila melanogaster]	GO:0006511(ubiquitin-dependent protein catabolic process)	IPR042299(Ufd1-like, Nn domain),IPR004854(Ubiquitin fusion degradation protein Ufd1-like)	PF03152(Ubiquitin fusion degradation protein UFD1)	Null	2YUJ_A Solution structure of human ubiquitin fusion degradation protein 1 homolog UFD1 [Homo sapiens]	Null	Null	Gmel010165.1 Ubiquitin fusion degradation protein 1 homolog OS=Drosophila melanogaster OX=7227 GN=Ufd1-like PE=2 SV=1	Null	TRINITY_GG_996_c7_g1_i2
g12952.t1	(pident:69.804) CAG5047696.1 unnamed protein product [Parnassius apollo]	(pident:70.36) unnamed protein product [Parnassius apollo]	(pident:27.91) ATP-dependent DNA helicase [Haloplanus rallus]	(pident:47.500) Full=Fanconi anemia group J protein; Short=Protein FACJ; AltName: Full=ATP-dependent RNA helicase BRIP1; AltName: Full=BRCA1-associated C-terminal helicase 1; AltName: Full=BRCA1-interacting protein C-terminal helicase 1; Short=BRCA1-interacting protein 1 [Homo sapiens]	GO:0003676(nucleic acid binding), GO:0004386(helicase activity), GO:0005524(ATP binding), GO:0006139(nucleobase-containing compound metabolic process), GO:0016818(hydrolase activity, acting on acid anhydrides, in phosphorus-containing anhydrides)	IPR045028(Helicase superfamily 1/2, DinG/Rad3-like),IPR027417(P-loop containing nucleoside triphosphate hydrolase),IPR006555(ATP-dependent helicase, C-terminal)	PF13307(Helicase C-terminal domain)	Null	Null	Null	Null	Onub018716.1 Fanconi anemia group J protein homolog OS=Gallus gallus OX=9031 GN=BRIP1 PE=2 SV=1	Null	TRINITY_GG_996_c6_g1_i1
g12943.t1	(pident:81.364) XP_028169007.1 ran-specific GTPase-activating protein-like [Ostrinia furnacalis]	(pident:81.36) ran-specific GTPase-activating protein-like [Ostrinia furnacalis]	(pident:54.86) Ran-binding domain-containing protein, partial [Tissierella creatinini]	(pident:57.664) Full=Ran-specific GTPase-activating protein; AltName: Full=Ran-binding protein 1; Short=RanBP1 [Bos taurus]	GO:0006913(nucleocytoplasmic transport), GO:0046907(intracellular transport)	IPR045256(Ran-specific GTPase-activating protein 1, Ran-binding domain),IPR045255(Ran binding protein RanBP1-like),IPR011993(PH-like domain superfamily),IPR000156(Ran binding domain)	PF00638(RanBP1 domain)	Null	1K5D_B Crystal structure of Ran-GPPNHP-RanBP1-RanGAP complex [Homo sapiens] /1K5D_E Crystal structure of Ran-GPPNHP-RanBP1-RanGAP complex [Homo sapiens] /1K5D_H Crystal structure of Ran-GPPNHP-RanBP1-RanGAP complex [Homo sapiens] /1K5D_K Crystal structure of Ran-GPPNHP-RanBP1-RanGAP complex [Homo sapiens] /1K5G_B Crystal structure of Ran-GDP-AlFx-RanBP1-RanGAP complex [Homo sapiens] /1K5G_E Cryst…	Null	Null	Ofur002753.1 Ran-specific GTPase-activating protein OS=Bos taurus OX=9913 GN=RANBP1 PE=2 SV=1	Null	TRINITY_GG_996_c5_g1_i2
g10172.t1	(pident:56.123) CAB3223826.1 unnamed protein product [Arctia plantaginis]	(pident:56.86) endonuclease/exonuclease/phosphatase family protein [Pseudomonas aeruginosa]<>hypothetical protein F3G58_31395 [Pseudomonas aeruginosa]	(pident:56.86) endonuclease/exonuclease/phosphatase family protein [Pseudomonas aeruginosa]	(pident:27.487) Full=Retrovirus-related Pol polyprotein from type-1 retrotransposable element R1; AltName: Full=Retrovirus-related Pol polyprotein from type I retrotransposable element R1; Includes: Full=Reverse transcriptase; Includes: Full=Endonuclease [Bradysia coprophila]	GO:0003824(catalytic activity)	IPR043502(DNA/RNA polymerase superfamily),IPR036691(Endonuclease/exonuclease/phosphatase superfamily),IPR005135(Endonuclease/exonuclease/phosphatase),IPR000477(Reverse transcriptase domain)	PF00078(Reverse transcriptase (RNA-dependent DNA polymerase)), PF14529(Endonuclease-reverse transcriptase)	Null	Null	Null	Null	Aper011878.1 Probable RNA-directed DNA polymerase from transposon BS OS=Drosophila melanogaster OX=7227 GN=RTase PE=2 SV=1	Null	TRINITY_GG_996_c34_g1_i1
g10330.t1	(pident:56.355) CAB3223826.1 unnamed protein product [Arctia plantaginis]	(pident:56.58) unnamed protein product [Arctia plantaginis]	(pident:57.30) endonuclease/exonuclease/phosphatase family protein [Pseudomonas aeruginosa]	(pident:27.512) Full=Retrovirus-related Pol polyprotein from type-1 retrotransposable element R1; AltName: Full=Retrovirus-related Pol polyprotein from type I retrotransposable element R1; Includes: Full=Reverse transcriptase; Includes: Full=Endonuclease [Bradysia coprophila]	Null	IPR043502(DNA/RNA polymerase superfamily),IPR036691(Endonuclease/exonuclease/phosphatase superfamily),IPR000477(Reverse transcriptase domain)	PF00078(Reverse transcriptase (RNA-dependent DNA polymerase))	Null	Null	Null	Null	Cstu000042.1 Retrovirus-related Pol polyprotein from type-1 retrotransposable element R1 (Fragment) OS=Bradysia coprophila OX=38358 PE=4 SV=1	Null	TRINITY_GG_996_c34_g1_i1
g10339.t1	(pident:58.079) CAB3223826.1 unnamed protein product [Arctia plantaginis]	(pident:60.29) reverse transcriptase family protein [Acinetobacter baumannii]	(pident:60.29) reverse transcriptase family protein [Acinetobacter baumannii]	(pident:30.208) Full=Retrovirus-related Pol polyprotein from type-1 retrotransposable element R1; AltName: Full=Retrovirus-related Pol polyprotein from type I retrotransposable element R1; Includes: Full=Reverse transcriptase; Includes: Full=Endonuclease [Bradysia coprophila]	Null	IPR043502(DNA/RNA polymerase superfamily),IPR000477(Reverse transcriptase domain)	PF00078(Reverse transcriptase (RNA-dependent DNA polymerase))	Null	Null	Null	Null	Cstu000042.1 Retrovirus-related Pol polyprotein from type-1 retrotransposable element R1 (Fragment) OS=Bradysia coprophila OX=38358 PE=4 SV=1	Null	TRINITY_GG_996_c34_g1_i1
g10523.t1	(pident:58.281) CAB3223826.1 unnamed protein product [Arctia plantaginis]	(pident:60.53) reverse transcriptase family protein [Acinetobacter baumannii]	(pident:60.53) reverse transcriptase family protein [Acinetobacter baumannii]	(pident:30.298) Full=Retrovirus-related Pol polyprotein from type-1 retrotransposable element R1; AltName: Full=Retrovirus-related Pol polyprotein from type I retrotransposable element R1; Includes: Full=Reverse transcriptase; Includes: Full=Endonuclease [Bradysia coprophila]	Null	IPR043502(DNA/RNA polymerase superfamily),IPR000477(Reverse transcriptase domain)	PF00078(Reverse transcriptase (RNA-dependent DNA polymerase))	Null	Null	Null	Null	Cstu000042.1 Retrovirus-related Pol polyprotein from type-1 retrotransposable element R1 (Fragment) OS=Bradysia coprophila OX=38358 PE=4 SV=1	Null	TRINITY_GG_996_c34_g1_i1
g10608.t1	(pident:50.826) XP_045535743.1 uncharacterized protein LOC106719018 [Papilio machaon]	(pident:50.74) uncharacterized protein LOC106719018 [Papilio machaon]	(pident:56.58) endonuclease/exonuclease/phosphatase family protein [Pseudomonas aeruginosa]	(pident:27.487) Full=Retrovirus-related Pol polyprotein from type-1 retrotransposable element R1; AltName: Full=Retrovirus-related Pol polyprotein from type I retrotransposable element R1; Includes: Full=Reverse transcriptase; Includes: Full=Endonuclease [Bradysia coprophila]	GO:0003824(catalytic activity)	IPR043502(DNA/RNA polymerase superfamily),IPR036691(Endonuclease/exonuclease/phosphatase superfamily),IPR005135(Endonuclease/exonuclease/phosphatase),IPR000477(Reverse transcriptase domain)	PF00078(Reverse transcriptase (RNA-dependent DNA polymerase)), PF14529(Endonuclease-reverse transcriptase)	Null	Null	Null	Null	Aper016591.1 Putative 115 kDa protein in type-1 retrotransposable element R1DM OS=Drosophila melanogaster OX=7227 GN=R1A1-element\ORF2 PE=4 SV=1	Null	TRINITY_GG_996_c34_g1_i1
g1135.t1	(pident:54.839) XP_032525082.1 uncharacterized protein LOC116776088 [Danaus plexippus plexippus]	(pident:43.46) uncharacterized protein LOC123721014 [Papilio machaon]	(pident:47.37) endonuclease/exonuclease/phosphatase family protein, partial [Pseudomonas aeruginosa]	Null	Null	IPR036691(Endonuclease/exonuclease/phosphatase superfamily)	Null	Null	Null	Null	Null	cpo120180.1 Retrovirus-related Pol polyprotein from type-1 retrotransposable element R1 (Fragment) OS=Bradysia coprophila OX=38358 PE=4 SV=1	Null	TRINITY_GG_996_c34_g1_i1
g11767.t1	Null	Null	Null	Null	Null	Null	Null	Null	Null	Null	Null	Null	Null	TRINITY_GG_996_c34_g1_i1
g12931.t1	(pident:51.730) XP_045535743.1 uncharacterized protein LOC106719018 [Papilio machaon]	(pident:56.61) unnamed protein product [Arctia plantaginis]	(pident:56.05) endonuclease/exonuclease/phosphatase family protein [Pseudomonas aeruginosa]	(pident:27.380) Full=Retrovirus-related Pol polyprotein from type-1 retrotransposable element R1; AltName: Full=Retrovirus-related Pol polyprotein from type I retrotransposable element R1; Includes: Full=Reverse transcriptase; Includes: Full=Endonuclease [Bradysia coprophila]	GO:0003676(nucleic acid binding), GO:0003824(catalytic activity), GO:0008270(zinc ion binding)	IPR043502(DNA/RNA polymerase superfamily),IPR036875(Zinc finger, CCHC-type superfamily),IPR036691(Endonuclease/exonuclease/phosphatase superfamily),IPR005135(Endonuclease/exonuclease/phosphatase),IPR001878(Zinc finger, CCHC-type),IPR000477(Reverse transcriptase domain)	PF00078(Reverse transcriptase (RNA-dependent DNA polymerase)), PF14529(Endonuclease-reverse transcriptase)	Null	Null	Null	Null	Cstu000042.1 Retrovirus-related Pol polyprotein from type-1 retrotransposable element R1 (Fragment) OS=Bradysia coprophila OX=38358 PE=4 SV=1	Null	TRINITY_GG_996_c34_g1_i1
g13225.t1	(pident:57.088) CAB3223826.1 unnamed protein product [Arctia plantaginis]	(pident:57.13) endonuclease/exonuclease/phosphatase family protein [Pseudomonas aeruginosa]<>hypothetical protein F3G58_31395 [Pseudomonas aeruginosa]	(pident:57.13) endonuclease/exonuclease/phosphatase family protein [Pseudomonas aeruginosa]	(pident:27.554) Full=Retrovirus-related Pol polyprotein from type-1 retrotransposable element R1; AltName: Full=Retrovirus-related Pol polyprotein from type I retrotransposable element R1; Includes: Full=Reverse transcriptase; Includes: Full=Endonuclease [Bradysia coprophila]	GO:0003824(catalytic activity)	IPR043502(DNA/RNA polymerase superfamily),IPR036691(Endonuclease/exonuclease/phosphatase superfamily),IPR005135(Endonuclease/exonuclease/phosphatase),IPR000477(Reverse transcriptase domain)	PF00078(Reverse transcriptase (RNA-dependent DNA polymerase)), PF14529(Endonuclease-reverse transcriptase)	Null	Null	Null	Null	Aper007149.1 Probable RNA-directed DNA polymerase from transposon BS OS=Drosophila melanogaster OX=7227 GN=RTase PE=2 SV=1	Null	TRINITY_GG_996_c34_g1_i1
g14894.t1	(pident:60.653) XP_039762536.1 LOW QUALITY PROTEIN: uncharacterized protein LOC120635593 [Pararge aegeria]	(pident:60.42) reverse transcriptase family protein [Acinetobacter baumannii]	(pident:60.42) reverse transcriptase family protein [Acinetobacter baumannii]	(pident:30.943) Full=Retrovirus-related Pol polyprotein from type-1 retrotransposable element R1; AltName: Full=Retrovirus-related Pol polyprotein from type I retrotransposable element R1; Includes: Full=Reverse transcriptase; Includes: Full=Endonuclease [Bradysia coprophila]	Null	IPR043502(DNA/RNA polymerase superfamily),IPR000477(Reverse transcriptase domain)	PF00078(Reverse transcriptase (RNA-dependent DNA polymerase))	Null	Null	Null	Null	Aper018763.1 Probable RNA-directed DNA polymerase from transposon BS OS=Drosophila melanogaster OX=7227 GN=RTase PE=2 SV=1	Null	TRINITY_GG_996_c34_g1_i1
g2409.t1	(pident:58.370) CAB3223826.1 unnamed protein product [Arctia plantaginis]	(pident:60.58) reverse transcriptase family protein [Acinetobacter baumannii]	(pident:60.58) reverse transcriptase family protein [Acinetobacter baumannii]	(pident:30.382) Full=Retrovirus-related Pol polyprotein from type-1 retrotransposable element R1; AltName: Full=Retrovirus-related Pol polyprotein from type I retrotransposable element R1; Includes: Full=Reverse transcriptase; Includes: Full=Endonuclease [Bradysia coprophila]	Null	IPR043502(DNA/RNA polymerase superfamily),IPR000477(Reverse transcriptase domain)	PF00078(Reverse transcriptase (RNA-dependent DNA polymerase))	Null	Null	Null	Null	Aper003438.1 Kinesin-like protein KIF19 OS=Mus musculus OX=10090 GN=Kif19 PE=1 SV=2	Null	TRINITY_GG_996_c34_g1_i1
g26542.t1	(pident:63.768) XP_028039297.1 LOW QUALITY PROTEIN: uncharacterized protein LOC114249793 [Bombyx mandarina]	(pident:64.04) hypothetical protein B5X24_HaOG204786 [Helicoverpa armigera]	(pident:63.36) reverse transcriptase family protein, partial [Pseudomonas aeruginosa]	(pident:32.000) Full=Probable RNA-directed DNA polymerase from transposon X-element; AltName: Full=Reverse transcriptase [Drosophila melanogaster]	Null	IPR043502(DNA/RNA polymerase superfamily),IPR000477(Reverse transcriptase domain)	PF00078(Reverse transcriptase (RNA-dependent DNA polymerase))	Null	Null	Null	Null	Aper018763.1 Probable RNA-directed DNA polymerase from transposon BS OS=Drosophila melanogaster OX=7227 GN=RTase PE=2 SV=1	Null	TRINITY_GG_996_c34_g1_i1
g26542.t2	(pident:59.019) CAB3254969.1 unnamed protein product [Arctia plantaginis]	(pident:57.33) reverse transcriptase family protein [Acinetobacter baumannii]	(pident:57.33) reverse transcriptase family protein [Acinetobacter baumannii]	(pident:30.208) Full=Retrovirus-related Pol polyprotein from type-1 retrotransposable element R1; AltName: Full=Retrovirus-related Pol polyprotein from type I retrotransposable element R1; Includes: Full=Reverse transcriptase; Includes: Full=Endonuclease [Bradysia coprophila]	Null	IPR043502(DNA/RNA polymerase superfamily),IPR000477(Reverse transcriptase domain)	PF00078(Reverse transcriptase (RNA-dependent DNA polymerase))	Null	Null	Null	Null	Cstu000042.1 Retrovirus-related Pol polyprotein from type-1 retrotransposable element R1 (Fragment) OS=Bradysia coprophila OX=38358 PE=4 SV=1	Null	TRINITY_GG_996_c34_g1_i1
g26761.t1	(pident:59.792) XP_039762536.1 LOW QUALITY PROTEIN: uncharacterized protein LOC120635593 [Pararge aegeria]	(pident:57.68) reverse transcriptase family protein [Pseudomonas aeruginosa]<>reverse transcriptase family protein [Pseudomonas aeruginosa]	(pident:57.68) reverse transcriptase family protein [Pseudomonas aeruginosa]	(pident:28.954) Full=Retrovirus-related Pol polyprotein from type-1 retrotransposable element R1; AltName: Full=Retrovirus-related Pol polyprotein from type I retrotransposable element R1; Includes: Full=Reverse transcriptase; Includes: Full=Endonuclease [Bradysia coprophila]	Null	IPR043502(DNA/RNA polymerase superfamily),IPR000477(Reverse transcriptase domain)	PF00078(Reverse transcriptase (RNA-dependent DNA polymerase))	Null	Null	Null	Null	Cstu000042.1 Retrovirus-related Pol polyprotein from type-1 retrotransposable element R1 (Fragment) OS=Bradysia coprophila OX=38358 PE=4 SV=1	Null	TRINITY_GG_996_c34_g1_i1
g26764.t1	(pident:54.227) CAB3223826.1 unnamed protein product [Arctia plantaginis]	(pident:53.98) endonuclease/exonuclease/phosphatase family protein [Pseudomonas aeruginosa]<>hypothetical protein F3G58_31395 [Pseudomonas aeruginosa]	(pident:53.98) endonuclease/exonuclease/phosphatase family protein [Pseudomonas aeruginosa]	(pident:28.282) Full=Retrovirus-related Pol polyprotein from type-1 retrotransposable element R1; AltName: Full=Retrovirus-related Pol polyprotein from type I retrotransposable element R1; Includes: Full=Reverse transcriptase; Includes: Full=Endonuclease [Bradysia coprophila]	GO:0003824(catalytic activity)	IPR043502(DNA/RNA polymerase superfamily),IPR036691(Endonuclease/exonuclease/phosphatase superfamily),IPR005135(Endonuclease/exonuclease/phosphatase),IPR000477(Reverse transcriptase domain)	PF00078(Reverse transcriptase (RNA-dependent DNA polymerase)), PF14529(Endonuclease-reverse transcriptase)	Null	Null	Null	Null	Cstu000042.1 Retrovirus-related Pol polyprotein from type-1 retrotransposable element R1 (Fragment) OS=Bradysia coprophila OX=38358 PE=4 SV=1	Null	TRINITY_GG_996_c34_g1_i1
g32517.t1	(pident:57.655) CAB3223826.1 unnamed protein product [Arctia plantaginis]	(pident:57.65) endonuclease/exonuclease/phosphatase family protein [Pseudomonas aeruginosa]<>hypothetical protein F3G58_31395 [Pseudomonas aeruginosa]	(pident:57.65) endonuclease/exonuclease/phosphatase family protein [Pseudomonas aeruginosa]	(pident:27.967) Full=Retrovirus-related Pol polyprotein from type-1 retrotransposable element R1; AltName: Full=Retrovirus-related Pol polyprotein from type I retrotransposable element R1; Includes: Full=Reverse transcriptase; Includes: Full=Endonuclease [Bradysia coprophila]	GO:0003824(catalytic activity)	IPR043502(DNA/RNA polymerase superfamily),IPR036691(Endonuclease/exonuclease/phosphatase superfamily),IPR005135(Endonuclease/exonuclease/phosphatase),IPR000477(Reverse transcriptase domain)	PF00078(Reverse transcriptase (RNA-dependent DNA polymerase)), PF14529(Endonuclease-reverse transcriptase)	Null	Null	Null	Null	Aper007149.1 Probable RNA-directed DNA polymerase from transposon BS OS=Drosophila melanogaster OX=7227 GN=RTase PE=2 SV=1	Null	TRINITY_GG_996_c34_g1_i1
g32804.t1	(pident:56.240) CAB3248307.1 unnamed protein product [Arctia plantaginis]	(pident:46.18) unnamed protein product [Arctia plantaginis]	(pident:46.18) endonuclease/exonuclease/phosphatase family protein [Pseudomonas aeruginosa]	(pident:27.656) Full=Putative 115 kDa protein in type-1 retrotransposable element R1DM; AltName: Full=ORF 2; AltName: Full=Putative 115 kDa protein in type I retrotransposable element R1DM [Drosophila melanogaster]	GO:0003824(catalytic activity)	IPR043502(DNA/RNA polymerase superfamily),IPR036691(Endonuclease/exonuclease/phosphatase superfamily),IPR005135(Endonuclease/exonuclease/phosphatase),IPR000477(Reverse transcriptase domain)	PF00078(Reverse transcriptase (RNA-dependent DNA polymerase)), PF14529(Endonuclease-reverse transcriptase)	Null	Null	Null	Null	Cstu000042.1 Retrovirus-related Pol polyprotein from type-1 retrotransposable element R1 (Fragment) OS=Bradysia coprophila OX=38358 PE=4 SV=1	Null	TRINITY_GG_996_c34_g1_i1
g34249.t1	(pident:57.655) CAB3223826.1 unnamed protein product [Arctia plantaginis]	(pident:57.55) endonuclease/exonuclease/phosphatase family protein [Pseudomonas aeruginosa]<>hypothetical protein F3G58_31395 [Pseudomonas aeruginosa]	(pident:57.55) endonuclease/exonuclease/phosphatase family protein [Pseudomonas aeruginosa]	(pident:27.864) Full=Retrovirus-related Pol polyprotein from type-1 retrotransposable element R1; AltName: Full=Retrovirus-related Pol polyprotein from type I retrotransposable element R1; Includes: Full=Reverse transcriptase; Includes: Full=Endonuclease [Bradysia coprophila]	GO:0003824(catalytic activity)	IPR043502(DNA/RNA polymerase superfamily),IPR036691(Endonuclease/exonuclease/phosphatase superfamily),IPR005135(Endonuclease/exonuclease/phosphatase),IPR000477(Reverse transcriptase domain)	PF00078(Reverse transcriptase (RNA-dependent DNA polymerase)), PF14529(Endonuclease-reverse transcriptase)	Null	Null	Null	Null	Aper011878.1 Probable RNA-directed DNA polymerase from transposon BS OS=Drosophila melanogaster OX=7227 GN=RTase PE=2 SV=1	Null	TRINITY_GG_996_c34_g1_i1
g34651.t1	(pident:58.553) CAB3224798.1 unnamed protein product [Arctia plantaginis]	(pident:58.55) reverse transcriptase family protein [Acinetobacter baumannii]	(pident:58.55) reverse transcriptase family protein [Pseudomonas aeruginosa]	(pident:28.451) Full=Retrovirus-related Pol polyprotein from type-1 retrotransposable element R1; AltName: Full=Retrovirus-related Pol polyprotein from type I retrotransposable element R1; Includes: Full=Reverse transcriptase; Includes: Full=Endonuclease [Bradysia coprophila]	Null	IPR043502(DNA/RNA polymerase superfamily),IPR000477(Reverse transcriptase domain)	PF00078(Reverse transcriptase (RNA-dependent DNA polymerase))	Null	Null	Null	Null	Cstu000042.1 Retrovirus-related Pol polyprotein from type-1 retrotransposable element R1 (Fragment) OS=Bradysia coprophila OX=38358 PE=4 SV=1	Null	TRINITY_GG_996_c34_g1_i1
g35896.t1	(pident:52.439) XP_026746894.1 uncharacterized protein LOC113508120 [Trichoplusia ni]	(pident:50.00) uncharacterized protein LOC112590177 [Harpegnathos saltator]	Null	Null	Null	Null	Null	Null	Null	Null	Null	Aper003438.1 Kinesin-like protein KIF19 OS=Mus musculus OX=10090 GN=Kif19 PE=1 SV=2	Null	TRINITY_GG_996_c34_g1_i1
g5556.t1	(pident:57.655) CAB3223826.1 unnamed protein product [Arctia plantaginis]	(pident:57.46) endonuclease/exonuclease/phosphatase family protein [Pseudomonas aeruginosa]<>hypothetical protein F3G58_31395 [Pseudomonas aeruginosa]	(pident:57.46) endonuclease/exonuclease/phosphatase family protein [Pseudomonas aeruginosa]	(pident:27.967) Full=Retrovirus-related Pol polyprotein from type-1 retrotransposable element R1; AltName: Full=Retrovirus-related Pol polyprotein from type I retrotransposable element R1; Includes: Full=Reverse transcriptase; Includes: Full=Endonuclease [Bradysia coprophila]	GO:0003824(catalytic activity)	IPR043502(DNA/RNA polymerase superfamily),IPR036691(Endonuclease/exonuclease/phosphatase superfamily),IPR005135(Endonuclease/exonuclease/phosphatase),IPR000477(Reverse transcriptase domain)	PF00078(Reverse transcriptase (RNA-dependent DNA polymerase)), PF14529(Endonuclease-reverse transcriptase)	Null	Null	Null	Null	Aper011878.1 Probable RNA-directed DNA polymerase from transposon BS OS=Drosophila melanogaster OX=7227 GN=RTase PE=2 SV=1	Null	TRINITY_GG_996_c34_g1_i1
g6237.t1	(pident:56.281) CAB3223826.1 unnamed protein product [Arctia plantaginis]	(pident:56.48) unnamed protein product [Arctia plantaginis]	(pident:56.53) endonuclease/exonuclease/phosphatase family protein [Pseudomonas aeruginosa]	(pident:27.575) Full=Retrovirus-related Pol polyprotein from type-1 retrotransposable element R1; AltName: Full=Retrovirus-related Pol polyprotein from type I retrotransposable element R1; Includes: Full=Reverse transcriptase; Includes: Full=Endonuclease [Bradysia coprophila]	GO:0003824(catalytic activity)	IPR043502(DNA/RNA polymerase superfamily),IPR036691(Endonuclease/exonuclease/phosphatase superfamily),IPR005135(Endonuclease/exonuclease/phosphatase),IPR000477(Reverse transcriptase domain)	PF00078(Reverse transcriptase (RNA-dependent DNA polymerase)), PF14529(Endonuclease-reverse transcriptase)	Null	Null	Null	Null	Cstu000042.1 Retrovirus-related Pol polyprotein from type-1 retrotransposable element R1 (Fragment) OS=Bradysia coprophila OX=38358 PE=4 SV=1	Null	TRINITY_GG_996_c34_g1_i1
g6259.t1	(pident:57.787) CAB3223826.1 unnamed protein product [Arctia plantaginis]	(pident:59.86) reverse transcriptase family protein [Acinetobacter baumannii]	(pident:59.86) reverse transcriptase family protein [Acinetobacter baumannii]	(pident:30.382) Full=Retrovirus-related Pol polyprotein from type-1 retrotransposable element R1; AltName: Full=Retrovirus-related Pol polyprotein from type I retrotransposable element R1; Includes: Full=Reverse transcriptase; Includes: Full=Endonuclease [Bradysia coprophila]	Null	IPR043502(DNA/RNA polymerase superfamily),IPR000477(Reverse transcriptase domain)	PF00078(Reverse transcriptase (RNA-dependent DNA polymerase))	Null	Null	Null	Null	Cstu000042.1 Retrovirus-related Pol polyprotein from type-1 retrotransposable element R1 (Fragment) OS=Bradysia coprophila OX=38358 PE=4 SV=1	Null	TRINITY_GG_996_c34_g1_i1
g6279.t1	(pident:59.922) XP_039762536.1 LOW QUALITY PROTEIN: uncharacterized protein LOC120635593 [Pararge aegeria]	(pident:57.80) reverse transcriptase family protein [Pseudomonas aeruginosa]<>reverse transcriptase family protein [Pseudomonas aeruginosa]	(pident:57.80) reverse transcriptase family protein [Pseudomonas aeruginosa]	(pident:28.418) Full=Retrovirus-related Pol polyprotein from type-1 retrotransposable element R1; AltName: Full=Retrovirus-related Pol polyprotein from type I retrotransposable element R1; Includes: Full=Reverse transcriptase; Includes: Full=Endonuclease [Bradysia coprophila]	Null	IPR043502(DNA/RNA polymerase superfamily),IPR000477(Reverse transcriptase domain)	PF00078(Reverse transcriptase (RNA-dependent DNA polymerase))	Null	Null	Null	Null	Cstu000042.1 Retrovirus-related Pol polyprotein from type-1 retrotransposable element R1 (Fragment) OS=Bradysia coprophila OX=38358 PE=4 SV=1	Null	TRINITY_GG_996_c34_g1_i1
g6443.t1	(pident:57.558) CAB3223826.1 unnamed protein product [Arctia plantaginis]	(pident:57.55) endonuclease/exonuclease/phosphatase family protein [Pseudomonas aeruginosa]<>hypothetical protein F3G58_31395 [Pseudomonas aeruginosa]	(pident:57.55) endonuclease/exonuclease/phosphatase family protein [Pseudomonas aeruginosa]	(pident:27.967) Full=Retrovirus-related Pol polyprotein from type-1 retrotransposable element R1; AltName: Full=Retrovirus-related Pol polyprotein from type I retrotransposable element R1; Includes: Full=Reverse transcriptase; Includes: Full=Endonuclease [Bradysia coprophila]	GO:0003824(catalytic activity)	IPR043502(DNA/RNA polymerase superfamily),IPR036691(Endonuclease/exonuclease/phosphatase superfamily),IPR005135(Endonuclease/exonuclease/phosphatase),IPR000477(Reverse transcriptase domain)	PF00078(Reverse transcriptase (RNA-dependent DNA polymerase)), PF14529(Endonuclease-reverse transcriptase)	Null	Null	Null	Null	Aper007149.1 Probable RNA-directed DNA polymerase from transposon BS OS=Drosophila melanogaster OX=7227 GN=RTase PE=2 SV=1	Null	TRINITY_GG_996_c34_g1_i1
g12942.t1	(pident:82.283) XP_030024467.1 leucine-zipper-like transcriptional regulator 1 [Manduca sexta]	(pident:81.65) leucine-zipper-like transcriptional regulator 1 [Hyposmocoma kahamanoa]<>leucine-zipper-like transcriptional regulator 1 [Hyposmocoma kahamanoa]	Null	(pident:56.969) Full=Leucine-zipper-like transcriptional regulator 1 homolog [Drosophila melanogaster]	GO:0005515(protein binding)	IPR015915(Kelch-type beta propeller),IPR011705(BTB/Kelch-associated),IPR011333(SKP1/BTB/POZ domain superfamily),IPR006652(Kelch repeat type 1),IPR000210(BTB/POZ domain)	PF00651(BTB/POZ domain), PF01344(Kelch motif), PF07707(BTB And C-terminal Kelch), PF13418(Galactose oxidase, central domain), PF13964(Kelch motif)	Null	Null	Null	Null	Gmel010029.1 Leucine-zipper-like transcriptional regulator 1 homolog OS=Drosophila melanogaster OX=7227 GN=Lztr1 PE=3 SV=1	Null	TRINITY_GG_996_c2_g1_i2
g12946.t1	(pident:100.000) XP_026754865.1 actin-related protein 2/3 complex subunit 4 [Galleria mellonella]	(pident:100.00) actin-related protein 2/3 complex subunit 4 [Plutella xylostella]<>PREDICTED: actin-related protein 2/3 complex subunit 4 [Amyelois transitella]<>actin-related protein 2/3 complex subunit 4 [Galleria mellonella]<>actin-related protein 2/3 complex subunit 4 [Ostrinia furnacalis]<>Actin- protein 2/3 complex subunit 4 [Plutella xylostella]<>unnamed protein product [Plutella xylostell…	(pident:47.06) hypothetical protein, partial [Salipiger sp. PrR004]	(pident:84.524) Full=Actin-related protein 2/3 complex subunit 4 [Xenopus laevis]	GO:0005885(Arp2/3 protein complex), GO:0015629(actin cytoskeleton), GO:0030041(actin filament polymerization), GO:0030833(regulation of actin filament polymerization), GO:0034314(Arp2/3 complex-mediated actin nucleation)	IPR034666(Arp2/3 complex subunit 2/4),IPR008384(Actin-related protein 2/3 complex subunit 4)	PF05856(ARP2/3 complex 20 kDa subunit (ARPC4))	Null	1K8K_F Crystal Structure of Arp2/3 Complex [Bos taurus] /1TYQ_F Crystal structure of Arp2/3 complex with bound ATP and calcium [Bos taurus] /1U2V_F Crystal structure of Arp2/3 complex with bound ADP and calcium [Bos taurus] /2P9I_F Crystal Structure of bovine Arp2/3 Complex co-crystallized with ADP and crosslinked with gluteraldehyde [Bos taurus] /2P9K_F Crystal structure of bovine Arp2/3 complex…	Null	Null	Atrn010780.1 Actin-related protein 2/3 complex subunit 4 OS=Xenopus laevis OX=8355 GN=arpc4 PE=1 SV=1	Null	TRINITY_GG_996_c14_g1_i1
g12951.t1	(pident:44.823) CAG5047660.1 unnamed protein product [Parnassius apollo]	(pident:47.08) zinc finger protein 808-like [Danaus plexippus plexippus]<>zinc finger protein 197 [Danaus plexippus plexippus]	Null	(pident:30.244) Full=Zinc finger protein 771; AltName: Full=Mesenchymal stem cell protein DSC43 [Homo sapiens]	Null	IPR036236(Zinc finger C2H2 superfamily),IPR013087(Zinc finger C2H2-type)	PF00096(Zinc finger, C2H2 type)	Null	Null	Null	Null	Null	Null	TRINITY_GG_996_c13_g1_i1
g6917.t1	(pident:46.667) PCG78614.1 hypothetical protein B5V51_3603, partial [Heliothis virescens]	(pident:47.12) hypothetical protein B5V51_3603, partial [Heliothis virescens]	Null	Null	Null	IPR013087(Zinc finger C2H2-type)	Null	Null	Null	Null	Null	Null	Null	TRINITY_GG_996_c13_g1_i1
g6920.t1	(pident:45.981) CAG5047660.1 unnamed protein product [Parnassius apollo]	(pident:50.48) zinc finger protein 624 [Manduca sexta]<>hypothetical protein O3G_MSEX006235 [Manduca sexta]	Null	(pident:36.994) Full=Zinc finger protein 710 [Mus musculus]	Null	IPR036236(Zinc finger C2H2 superfamily),IPR013087(Zinc finger C2H2-type)	PF00096(Zinc finger, C2H2 type)	Null	Null	Null	Null	Hfuc005201.1 Zinc finger protein 711 OS=Danio rerio OX=7955 GN=znf711 PE=1 SV=1	Null	TRINITY_GG_996_c13_g1_i1
g12950.t1	(pident:51.103) XP_013142213.1 PREDICTED: transport and Golgi organization protein 2 homolog isoform X2 [Papilio polytes]	(pident:51.29) PREDICTED: transport and Golgi organization protein 2 homolog isoform X2 [Papilio polytes]	(pident:32.62) NRDE family protein [Serpentinicella alkaliphila]	(pident:37.121) Full=Transport and Golgi organization protein 2 [Drosophila melanogaster]	Null	IPR008551(Transport and Golgi organisation protein 2)	PF05742(Transport and Golgi organisation 2)	Null	Null	Null	Null	Hpyr017041.1 Transport and Golgi organization protein 2 OS=Drosophila melanogaster OX=7227 GN=Tango2 PE=2 SV=2	Null	TRINITY_GG_996_c12_g1_i1
g6916.t1	(pident:51.103) XP_013142213.1 PREDICTED: transport and Golgi organization protein 2 homolog isoform X2 [Papilio polytes]	(pident:51.29) PREDICTED: transport and Golgi organization protein 2 homolog isoform X2 [Papilio polytes]	(pident:33.69) NRDE family protein [Serpentinicella alkaliphila]	(pident:36.742) Full=Transport and Golgi organization protein 2 [Drosophila melanogaster]	Null	IPR008551(Transport and Golgi organisation protein 2)	PF05742(Transport and Golgi organisation 2)	Null	Null	Null	Null	Lcam007209.1 Transport and Golgi organization protein 2 OS=Drosophila melanogaster OX=7227 GN=Tango2 PE=2 SV=2	Null	TRINITY_GG_996_c12_g1_i1
g12948.t1	(pident:94.709) XP_013184154.1 PREDICTED: clathrin heavy chain isoform X2 [Amyelois transitella]	(pident:94.05) PREDICTED: clathrin heavy chain isoform X2 [Amyelois transitella]	(pident:83.53) hypothetical protein, partial [Escherichia coli]	(pident:84.905) Full=Clathrin heavy chain [Drosophila melanogaster]	GO:0005198(structural molecule activity), GO:0005515(protein binding), GO:0006886(intracellular protein transport), GO:0016192(vesicle-mediated transport), GO:0030130(clathrin coat of trans-Golgi network vesicle), GO:0030132(clathrin coat of coated pit), GO:0032051(clathrin light chain binding), GO:0071439(clathrin complex)	IPR022365(Clathrin, heavy chain, propeller repeat),IPR016341(Clathrin, heavy chain),IPR016025(Clathrin heavy chain, N-terminal),IPR016024(Armadillo-type fold),IPR015348(Clathrin, heavy chain, linker, core motif),IPR011990(Tetratricopeptide-like helical domain superfamily),IPR000547(Clathrin, heavy chain/VPS, 7-fold repeat)	PF00637(Region in Clathrin and VPS), PF01394(Clathrin propeller repeat), PF09268(Clathrin, heavy-chain linker), PF13838(Clathrin-H-link)	protein_Group:_122,_ProteinID:_97,_lgP:_320.78,_Coverage:_25,_#Peptides:_41,_#Unique:_39,_PTM:_Y,_Avg.Mass:_191474	6SCT_A Cryo-EM structure of the consensus triskelion hub of the clathrin coat complex [Sus scrofa] /6SCT_B Cryo-EM structure of the consensus triskelion hub of the clathrin coat complex [Sus scrofa] /6SCT_C Cryo-EM structure of the consensus triskelion hub of the clathrin coat complex [Sus scrofa] /6SCT_F Cryo-EM structure of the consensus triskelion hub of the clathrin coat complex [Sus scrofa] …	Null	CAG5108733.1 Oidioi.mRNA.OKI2018_I69.chr1.g3928.t1.cds [Oikopleura dioica]	Atrn010801.1 Clathrin heavy chain OS=Drosophila melanogaster OX=7227 GN=Chc PE=1 SV=1	Null	TRINITY_GG_996_c0_g3_i1
g12948.t2	(pident:94.537) XP_013184154.1 PREDICTED: clathrin heavy chain isoform X2 [Amyelois transitella]	(pident:93.95) hypothetical protein JYU34_011862 [Plutella xylostella]	(pident:83.53) hypothetical protein, partial [Escherichia coli]	(pident:84.744) Full=Clathrin heavy chain [Drosophila melanogaster]	GO:0005198(structural molecule activity), GO:0005515(protein binding), GO:0006886(intracellular protein transport), GO:0016192(vesicle-mediated transport), GO:0030130(clathrin coat of trans-Golgi network vesicle), GO:0030132(clathrin coat of coated pit), GO:0032051(clathrin light chain binding), GO:0071439(clathrin complex)	IPR022365(Clathrin, heavy chain, propeller repeat),IPR016341(Clathrin, heavy chain),IPR016025(Clathrin heavy chain, N-terminal),IPR016024(Armadillo-type fold),IPR015348(Clathrin, heavy chain, linker, core motif),IPR011990(Tetratricopeptide-like helical domain superfamily),IPR000547(Clathrin, heavy chain/VPS, 7-fold repeat)	PF00637(Region in Clathrin and VPS), PF01394(Clathrin propeller repeat), PF09268(Clathrin, heavy-chain linker), PF13838(Clathrin-H-link)	Null	6SCT_A Cryo-EM structure of the consensus triskelion hub of the clathrin coat complex [Sus scrofa] /6SCT_B Cryo-EM structure of the consensus triskelion hub of the clathrin coat complex [Sus scrofa] /6SCT_C Cryo-EM structure of the consensus triskelion hub of the clathrin coat complex [Sus scrofa] /6SCT_F Cryo-EM structure of the consensus triskelion hub of the clathrin coat complex [Sus scrofa] …	Null	CAG5108733.1 Oidioi.mRNA.OKI2018_I69.chr1.g3928.t1.cds [Oikopleura dioica]	Ecla005359.1 Clathrin heavy chain OS=Drosophila melanogaster OX=7227 GN=Chc PE=1 SV=1	Null	TRINITY_GG_996_c0_g3_i1
g6913.t1	(pident:94.835) XP_013184154.1 PREDICTED: clathrin heavy chain isoform X2 [Amyelois transitella]	(pident:93.98) clathrin heavy chain isoform X1 [Aricia agestis]	(pident:83.53) hypothetical protein, partial [Escherichia coli]	(pident:85.336) Full=Clathrin heavy chain [Drosophila melanogaster]	GO:0005198(structural molecule activity), GO:0005515(protein binding), GO:0006886(intracellular protein transport), GO:0016192(vesicle-mediated transport), GO:0030130(clathrin coat of trans-Golgi network vesicle), GO:0030132(clathrin coat of coated pit), GO:0032051(clathrin light chain binding), GO:0071439(clathrin complex)	IPR022365(Clathrin, heavy chain, propeller repeat),IPR016341(Clathrin, heavy chain),IPR016025(Clathrin heavy chain, N-terminal),IPR016024(Armadillo-type fold),IPR015348(Clathrin, heavy chain, linker, core motif),IPR012331(Clathrin, heavy chain, linker),IPR011990(Tetratricopeptide-like helical domain superfamily),IPR000547(Clathrin, heavy chain/VPS, 7-fold repeat)	PF00637(Region in Clathrin and VPS), PF01394(Clathrin propeller repeat), PF09268(Clathrin, heavy-chain linker), PF13838(Clathrin-H-link)	Null	6SCT_A Cryo-EM structure of the consensus triskelion hub of the clathrin coat complex [Sus scrofa] /6SCT_B Cryo-EM structure of the consensus triskelion hub of the clathrin coat complex [Sus scrofa] /6SCT_C Cryo-EM structure of the consensus triskelion hub of the clathrin coat complex [Sus scrofa] /6SCT_F Cryo-EM structure of the consensus triskelion hub of the clathrin coat complex [Sus scrofa] …	Null	CAG5108733.1 Oidioi.mRNA.OKI2018_I69.chr1.g3928.t1.cds [Oikopleura dioica]	Lphl020503.1 Clathrin heavy chain OS=Drosophila melanogaster OX=7227 GN=Chc PE=1 SV=1	Null	TRINITY_GG_996_c0_g3_i1
g12945.t1	(pident:95.500) RVE54018.1 hypothetical protein evm_001421 [Chilo suppressalis]	(pident:96.50) unnamed protein product [Leptidea sinapis]	(pident:62.13) Rab GTPase family protein, partial [Macrococcus caseolyticus]	(pident:75.622) Full=Ras-related protein Rab-35; AltName: Full=GTP-binding protein RAY; AltName: Full=Ras-related protein Rab-1C [Homo sapiens]<> Full=Ras-related protein Rab-35 [Rattus norvegicus]<> Full=Ras-related protein Rab-35 [Mus musculus]	GO:0003924(GTPase activity), GO:0005525(GTP binding)	IPR027417(P-loop containing nucleoside triphosphate hydrolase),IPR005225(Small GTP-binding protein domain),IPR001806(Small GTPase)	PF00071(Ras family)	Null	3TW8_B GEF domain of DENND 1B in complex with Rab GTPase Rab35 [Homo sapiens] /3TW8_D GEF domain of DENND 1B in complex with Rab GTPase Rab35 [Homo sapiens]	Q96VL3#PHI:339#CLPT1#290576#Colletotrichum_lindemuthianum#reduced_virulence	Null	Pint005379.1 Ras-related protein Rab-35 OS=Homo sapiens OX=9606 GN=RAB35 PE=1 SV=1	Null	TRINITY_GG_996_c0_g1_i8
g31016.t1	(pident:73.451) CAG9088607.1 unnamed protein product [Plutella xylostella]	(pident:73.45) uncharacterized protein LOC105384784 [Plutella xylostella]<>unnamed protein product [Plutella xylostella]	Null	Null	Null	IPR041667(Cupin-like domain 8)	PF13621(Cupin-like domain)	Null	Null	Null	Null	Dpor009824.1 Putative uncharacterized protein	Null	TRINITY_GG_995_c0_g1_i2
g36306.t1	(pident:73.913) CAG9088607.1 unnamed protein product [Plutella xylostella]	(pident:73.91) uncharacterized protein LOC105384784 [Plutella xylostella]<>unnamed protein product [Plutella xylostella]	Null	Null	Null	IPR041667(Cupin-like domain 8)	PF13621(Cupin-like domain)	Null	Null	Null	Null	Dpor009824.1 Putative uncharacterized protein	Null	TRINITY_GG_995_c0_g1_i2
g31018.t1	(pident:50.347) XP_035444617.1 centrosomal protein of 164 kDa-like [Spodoptera frugiperda]	(pident:43.11) fas-binding factor 1 homolog [Hyposmocoma kahamanoa]	Null	(pident:20.898) Full=Fas-binding factor 1; Short=FBF-1 [Mus musculus]	GO:0060271(cilium assembly), GO:0090162(establishment of epithelial cell polarity), GO:0097539(ciliary transition fiber)	IPR033561(Fas-binding factor 1)	Null	Null	Null	Null	Null	Null	Null	TRINITY_GG_994_c6_g1_i1
g31024.t1	(pident:58.238) XP_026491167.1 nose resistant to fluoxetine protein 6-like [Vanessa tameamea]	(pident:67.71) nose resistant to fluoxetine protein 6-like [Plutella xylostella]	(pident:26.77) hypothetical protein, partial [Macrococcus caseolyticus]	(pident:27.341) Full=Nose resistant to fluoxetine protein 6; Short=Protein nrf-6; Flags: Precursor [Caenorhabditis elegans]	GO:0016747(transferase activity, transferring acyl groups other than amino-acyl groups)	IPR006621(Nose resistant-to-fluoxetine protein, N-terminal),IPR002656(Acyltransferase 3 domain)	PF01757(Acyltransferase family), PF20146(Nose resistant-to-fluoxetine protein, N-terminal domain)	Null	Null	Null	Null	Ecla009600.1 Nose resistant to fluoxetine protein 6 OS=Caenorhabditis elegans OX=6239 GN=nrf-6 PE=1 SV=3	Null	TRINITY_GG_994_c2_g1_i3
g31023.t1	(pident:59.111) XP_021182678.1 uncharacterized protein LOC110370966 [Helicoverpa armigera]	(pident:61.05) unnamed protein product [Arctia plantaginis]	Null	(pident:23.041) Full=Nose resistant to fluoxetine protein 6; Short=Protein nrf-6; Flags: Precursor [Caenorhabditis elegans]	Null	IPR006621(Nose resistant-to-fluoxetine protein, N-terminal)	PF20146(Nose resistant-to-fluoxetine protein, N-terminal domain)	Null	Null	Null	Null	Npro003606.1 Nose resistant to fluoxetine protein 6 OS=Caenorhabditis elegans OX=6239 GN=nrf-6 PE=1 SV=3	Null	TRINITY_GG_994_c15_g1_i1
g31375.t1	(pident:62.238) XP_021182678.1 uncharacterized protein LOC110370966 [Helicoverpa armigera]	(pident:75.69) uncharacterized protein LOC110370966 [Helicoverpa armigera]	Null	(pident:23.587) Full=Nose resistant to fluoxetine protein 6; Short=Protein nrf-6; Flags: Precursor [Caenorhabditis elegans]	Null	IPR006621(Nose resistant-to-fluoxetine protein, N-terminal)	PF20146(Nose resistant-to-fluoxetine protein, N-terminal domain)	Null	Null	Null	Null	Npro003606.1 Nose resistant to fluoxetine protein 6 OS=Caenorhabditis elegans OX=6239 GN=nrf-6 PE=1 SV=3	Null	TRINITY_GG_994_c15_g1_i1
g31376.t1	Null	Null	Null	Null	Null	Null	Null	Null	Null	Null	Null	Null	Null	TRINITY_GG_994_c15_g1_i1
g31026.t1	(pident:73.885) XP_035431874.1 uncharacterized protein LOC118263801 isoform X3 [Spodoptera frugiperda]	(pident:74.35) uncharacterized protein LOC118263718 isoform X3 [Spodoptera frugiperda]<>uncharacterized protein LOC118263801 isoform X3 [Spodoptera frugiperda]	Null	(pident:23.858) Full=Zwei Ig domain protein zig-8; AltName: Full=2 Ig domain protein zig-8; Flags: Precursor [Caenorhabditis elegans]	Null	IPR037448(Zwei Ig domain protein zig-8),IPR036179(Immunoglobulin-like domain superfamily),IPR013783(Immunoglobulin-like fold),IPR013106(Immunoglobulin V-set domain),IPR007110(Immunoglobulin-like domain),IPR003599(Immunoglobulin subtype),IPR003598(Immunoglobulin subtype 2)	PF07686(Immunoglobulin V-set domain), PF13927(Immunoglobulin domain)	Null	5EO9_A Crystal Structure of the complex of Dpr6 Domain 1 bound to DIP-alpha Domain 1+2 [Drosophila melanogaster]	Null	Null	Sfru012683.1 Carcinoembryonic antigen-related cell adhesion molecule 1 OS=Rattus norvegicus OX=10116 GN=Ceacam1 PE=1 SV=4	Null	TRINITY_GG_994_c12_g1_i1
g31026.t2	(pident:74.613) XP_035431872.1 uncharacterized protein LOC118263801 isoform X1 [Spodoptera frugiperda]	(pident:75.08) uncharacterized protein LOC118263718 isoform X1 [Spodoptera frugiperda]<>uncharacterized protein LOC118263801 isoform X1 [Spodoptera frugiperda]	Null	(pident:23.697) Full=Zwei Ig domain protein zig-8; AltName: Full=2 Ig domain protein zig-8; Flags: Precursor [Caenorhabditis elegans]	Null	IPR037448(Zwei Ig domain protein zig-8),IPR036179(Immunoglobulin-like domain superfamily),IPR013783(Immunoglobulin-like fold),IPR013106(Immunoglobulin V-set domain),IPR007110(Immunoglobulin-like domain),IPR003599(Immunoglobulin subtype),IPR003598(Immunoglobulin subtype 2)	PF07686(Immunoglobulin V-set domain), PF13927(Immunoglobulin domain)	Null	5EO9_A Crystal Structure of the complex of Dpr6 Domain 1 bound to DIP-alpha Domain 1+2 [Drosophila melanogaster]	Null	Null	Sfru012683.1 Carcinoembryonic antigen-related cell adhesion molecule 1 OS=Rattus norvegicus OX=10116 GN=Ceacam1 PE=1 SV=4	Null	TRINITY_GG_994_c12_g1_i1
g6911.t1	Null	Null	Null	Null	Null	Null	Null	Null	Null	Null	Null	Null	Null	TRINITY_GG_994_c12_g1_i1
g6912.t1	(pident:77.288) CAB3256785.1 unnamed protein product [Arctia plantaginis]	(pident:77.47) uncharacterized protein LOC118263718 isoform X1 [Spodoptera frugiperda]<>uncharacterized protein LOC118263801 isoform X1 [Spodoptera frugiperda]	Null	(pident:23.697) Full=Zwei Ig domain protein zig-8; AltName: Full=2 Ig domain protein zig-8; Flags: Precursor [Caenorhabditis elegans]	Null	IPR037448(Zwei Ig domain protein zig-8),IPR036179(Immunoglobulin-like domain superfamily),IPR013783(Immunoglobulin-like fold),IPR013106(Immunoglobulin V-set domain),IPR007110(Immunoglobulin-like domain),IPR003599(Immunoglobulin subtype),IPR003598(Immunoglobulin subtype 2)	PF07686(Immunoglobulin V-set domain), PF13927(Immunoglobulin domain)	Null	5EO9_A Crystal Structure of the complex of Dpr6 Domain 1 bound to DIP-alpha Domain 1+2 [Drosophila melanogaster]	Null	Null	Sfru012683.1 Carcinoembryonic antigen-related cell adhesion molecule 1 OS=Rattus norvegicus OX=10116 GN=Ceacam1 PE=1 SV=4	Null	TRINITY_GG_994_c12_g1_i1
g31019.t1	(pident:79.845) XP_013190720.1 PREDICTED: rab11 family-interacting protein 4 isoform X3 [Amyelois transitella]	(pident:76.26) hypothetical protein O3G_MSEX003595 [Manduca sexta]	Null	(pident:28.182) Full=Rab11 family-interacting protein 3; Short=FIP3-Rab11; Short=Rab11-FIP3 [Mus musculus]	Null	IPR037245(FIP-RBD, C-terminal domain superfamily),IPR019018(Rab-binding domain FIP-RBD)	PF09457(FIP domain)	Null	Null	Null	Null	Efla004778.1 Rab11 family-interacting protein 4 OS=Mus musculus OX=10090 GN=Rab11fip4 PE=1 SV=1	Null	TRINITY_GG_994_c1_g1_i1
g31019.t2	(pident:77.778) XP_013190720.1 PREDICTED: rab11 family-interacting protein 4 isoform X3 [Amyelois transitella]	(pident:78.02) hypothetical protein B5V51_5999 [Heliothis virescens]	Null	(pident:29.430) Full=Rab11 family-interacting protein 3; Short=FIP3-Rab11; Short=Rab11-FIP3 [Mus musculus]	Null	IPR037245(FIP-RBD, C-terminal domain superfamily),IPR019018(Rab-binding domain FIP-RBD)	PF09457(FIP domain)	Null	Null	Null	Null	Efla004778.1 Rab11 family-interacting protein 4 OS=Mus musculus OX=10090 GN=Rab11fip4 PE=1 SV=1	Null	TRINITY_GG_994_c1_g1_i1
g31021.t1	(pident:40.816) XP_023939046.1 nose resistant to fluoxetine protein 6-like [Bicyclus anynana]	(pident:41.24) unnamed protein product [Parnassius apollo]	Null	Null	Null	Null	Null	Null	Null	Null	Null	Null	Null	TRINITY_GG_994_c0_g1_i1
g31378.t1	(pident:71.965) XP_011558480.2 nose resistant to fluoxetine protein 6 [Plutella xylostella]	(pident:71.97) hypothetical protein JYU34_009381 [Plutella xylostella]	Null	(pident:22.029) Full=Nose resistant to fluoxetine protein 6; Short=Protein nrf-6; Flags: Precursor [Caenorhabditis elegans]	GO:0016747(transferase activity, transferring acyl groups other than amino-acyl groups)	IPR006621(Nose resistant-to-fluoxetine protein, N-terminal),IPR002656(Acyltransferase 3 domain)	PF01757(Acyltransferase family), PF20146(Nose resistant-to-fluoxetine protein, N-terminal domain)	Null	Null	Null	Null	Pxut010579.1 Nose resistant to fluoxetine protein 6 OS=Caenorhabditis elegans OX=6239 GN=nrf-6 PE=1 SV=3	Null	TRINITY_GG_994_c0_g1_i1
g14103.t1	(pident:68.363) XP_037972764.1 uncharacterized protein LOC105386277 isoform X1 [Plutella xylostella]	(pident:67.08) uncharacterized protein LOC115442702 [Manduca sexta]	Null	(pident:33.668) Full=Regulator of G-protein signaling loco; Short=RGS; AltName: Full=Locomotion defects protein; Short=Loco [Drosophila melanogaster]	GO:0005515(protein binding)	IPR036034(PDZ superfamily),IPR011993(PH-like domain superfamily),IPR001849(Pleckstrin homology domain),IPR001478(PDZ domain)	PF00169(PH domain), PF00595(PDZ domain)	Null	Null	Null	Null	Msex008292.1 Probable serine/threonine-protein kinase DDB_G0272282 OS=Dictyostelium discoideum OX=44689 GN=DDB_G0272282 PE=3 SV=1	Null	TRINITY_GG_990_c12_g1_i1
g14103.t2	(pident:77.112) XP_026321631.1 uncharacterized protein LOC113231521 [Hyposmocoma kahamanoa]	(pident:79.89) unnamed protein product [Arctia plantaginis]	Null	(pident:33.668) Full=Regulator of G-protein signaling loco; Short=RGS; AltName: Full=Locomotion defects protein; Short=Loco [Drosophila melanogaster]	GO:0005515(protein binding)	IPR036034(PDZ superfamily),IPR011993(PH-like domain superfamily),IPR001849(Pleckstrin homology domain),IPR001478(PDZ domain)	PF00169(PH domain), PF00595(PDZ domain)	Null	Null	Null	Null	Dpor007991.1 Probable serine/threonine-protein kinase DDB_G0272282 OS=Dictyostelium discoideum OX=44689 GN=DDB_G0272282 PE=3 SV=1	Null	TRINITY_GG_990_c12_g1_i1
g27225.t1	(pident:81.677) XP_045522566.1 uncharacterized protein LOC123713107 isoform X1 [Pieris brassicae]	(pident:79.94) unnamed protein product [Pieris macdunnoughi]	(pident:49.15) hypothetical protein, partial [Pseudomonas aeruginosa]	(pident:33.668) Full=Regulator of G-protein signaling loco; Short=RGS; AltName: Full=Locomotion defects protein; Short=Loco [Drosophila melanogaster]	GO:0005515(protein binding)	IPR036034(PDZ superfamily),IPR011993(PH-like domain superfamily),IPR001849(Pleckstrin homology domain),IPR001478(PDZ domain)	PF00169(PH domain), PF00595(PDZ domain)	Null	Null	Null	Null	Hves022386.1 Probable serine/threonine-protein kinase DDB_G0272282 OS=Dictyostelium discoideum OX=44689 GN=DDB_G0272282 PE=3 SV=1	Null	TRINITY_GG_990_c12_g1_i1
g14105.t1	(pident:76.970) RVE51431.1 hypothetical protein evm_003986 [Chilo suppressalis]	(pident:75.91) hypothetical protein evm_003986 [Chilo suppressalis]	Null	(pident:61.050) Full=Protein bowel; AltName: Full=Brother of odd with entrails limited [Drosophila melanogaster]	Null	IPR036236(Zinc finger C2H2 superfamily),IPR013087(Zinc finger C2H2-type)	PF00096(Zinc finger, C2H2 type)	Null	2EE8_A Solution structure of three zf-C2H2 domains from mouse protein odd-skipped-related 2 splicing isoform 2 [Mus musculus]	Null	Null	Mjur005407.1 Protein bowel OS=Drosophila melanogaster OX=7227 GN=bowl PE=1 SV=1	Null	TRINITY_GG_990_c0_g1_i1
g27227.t1	(pident:76.970) RVE51431.1 hypothetical protein evm_003986 [Chilo suppressalis]	(pident:75.91) hypothetical protein evm_003986 [Chilo suppressalis]	Null	(pident:61.050) Full=Protein bowel; AltName: Full=Brother of odd with entrails limited [Drosophila melanogaster]	Null	IPR036236(Zinc finger C2H2 superfamily),IPR013087(Zinc finger C2H2-type)	PF00096(Zinc finger, C2H2 type)	Null	2EE8_A Solution structure of three zf-C2H2 domains from mouse protein odd-skipped-related 2 splicing isoform 2 [Mus musculus]	Null	Null	Mjur005407.1 Protein bowel OS=Drosophila melanogaster OX=7227 GN=bowl PE=1 SV=1	Null	TRINITY_GG_990_c0_g1_i1
g3511.t1	(pident:68.997) RVE51431.1 hypothetical protein evm_003986 [Chilo suppressalis]	(pident:66.26) protein bowel-like [Hyposmocoma kahamanoa]<>protein bowel-like [Hyposmocoma kahamanoa]	Null	(pident:63.846) Full=Protein bowel; AltName: Full=Brother of odd with entrails limited [Drosophila melanogaster]	Null	IPR036236(Zinc finger C2H2 superfamily),IPR013087(Zinc finger C2H2-type)	PF00096(Zinc finger, C2H2 type)	Null	Null	Null	Null	Hkah001237.1 Putative uncharacterized protein	Null	TRINITY_GG_990_c0_g1_i1
g4673.t1	(pident:67.909) CAG9127021.1 unnamed protein product [Plutella xylostella]	(pident:67.91) lipoamide acyltransferase component of branched-chain alpha-keto acid dehydrogenase complex, mitochondrial [Plutella xylostella]<>unnamed protein product [Plutella xylostella]	(pident:43.65) 2-oxo acid dehydrogenase subunit E2 [Parahaliea mediterranea]	(pident:52.715) Full=Lipoamide acyltransferase component of branched-chain alpha-keto acid dehydrogenase complex, mitochondrial; AltName: Full=Branched-chain alpha-keto acid dehydrogenase complex component E2; AltName: Full=Dihydrolipoamide branched-chain transacylase E2; Flags: Precursor [Caenorhabditis elegans]	GO:0016746(transferase activity, transferring acyl groups)	IPR036625(E3-binding domain superfamily),IPR023213(Chloramphenicol acetyltransferase-like domain superfamily),IPR011053(Single hybrid motif),IPR004167(Peripheral subunit-binding domain),IPR003016(2-oxo acid dehydrogenase, lipoyl-binding site),IPR001078(2-oxoacid dehydrogenase acyltransferase, catalytic domain),IPR000089(Biotin/lipoyl attachment)	PF00198(2-oxoacid dehydrogenases acyltransferase (catalytic domain)), PF00364(Biotin-requiring enzyme), PF02817(e3 binding domain)	protein_Group:_938,_ProteinID:_1281,_lgP:_102.63,_Coverage:_13,_#Peptides:_6,_#Unique:_5,_PTM:_Y,_Avg.Mass:_51373	2IHW_A Crystal structure of a cubic core of the dihydrolipoamide acyltransferase (E2b) component in the branched-chain alpha-ketoacid dehydrogenase complex (BCKDC), apo form [Bos taurus] /2IHW_B Crystal structure of a cubic core of the dihydrolipoamide acyltransferase (E2b) component in the branched-chain alpha-ketoacid dehydrogenase complex (BCKDC), apo form [Bos taurus] /2IHW_C Crystal structur…	Null	Null	Pxyl016991.1 Lipoamide acyltransferase component of branched-chain alpha-keto acid dehydrogenase complex, mitochondrial OS=Mus musculus OX=10090 GN=Dbt PE=1 SV=2	Null	TRINITY_GG_99_c4_g1_i1
g5447.t1	(pident:67.532) CAG9127021.1 unnamed protein product [Plutella xylostella]	(pident:67.53) lipoamide acyltransferase component of branched-chain alpha-keto acid dehydrogenase complex, mitochondrial [Plutella xylostella]<>unnamed protein product [Plutella xylostella]	(pident:43.36) 2-oxo acid dehydrogenase subunit E2 [Parahaliea mediterranea]	(pident:52.732) Full=Lipoamide acyltransferase component of branched-chain alpha-keto acid dehydrogenase complex, mitochondrial; AltName: Full=Branched-chain alpha-keto acid dehydrogenase complex component E2; AltName: Full=Dihydrolipoamide branched-chain transacylase E2; Flags: Precursor [Caenorhabditis elegans]	GO:0016746(transferase activity, transferring acyl groups)	IPR036625(E3-binding domain superfamily),IPR023213(Chloramphenicol acetyltransferase-like domain superfamily),IPR011053(Single hybrid motif),IPR004167(Peripheral subunit-binding domain),IPR003016(2-oxo acid dehydrogenase, lipoyl-binding site),IPR001078(2-oxoacid dehydrogenase acyltransferase, catalytic domain),IPR000089(Biotin/lipoyl attachment)	PF00198(2-oxoacid dehydrogenases acyltransferase (catalytic domain)), PF00364(Biotin-requiring enzyme), PF02817(e3 binding domain)	Null	2IHW_A Crystal structure of a cubic core of the dihydrolipoamide acyltransferase (E2b) component in the branched-chain alpha-ketoacid dehydrogenase complex (BCKDC), apo form [Bos taurus] /2IHW_B Crystal structure of a cubic core of the dihydrolipoamide acyltransferase (E2b) component in the branched-chain alpha-ketoacid dehydrogenase complex (BCKDC), apo form [Bos taurus] /2IHW_C Crystal structur…	Null	Null	Pxyl016991.1 Lipoamide acyltransferase component of branched-chain alpha-keto acid dehydrogenase complex, mitochondrial OS=Mus musculus OX=10090 GN=Dbt PE=1 SV=2	Null	TRINITY_GG_99_c4_g1_i1
g4677.t1	(pident:82.862) XP_011559341.2 tyrosine-protein kinase transmembrane receptor Ror2 [Plutella xylostella]	(pident:83.68) hypothetical protein JYU34_016363 [Plutella xylostella]	(pident:37.82) protein kinase, partial [Salmonella enterica]	(pident:53.870) Full=Tyrosine-protein kinase transmembrane receptor Ror2; Short=dRor2; AltName: Full=Neurospecific receptor tyrosine kinase; Flags: Precursor [Drosophila melanogaster]	GO:0004672(protein kinase activity), GO:0004713(protein tyrosine kinase activity), GO:0005515(protein binding), GO:0005524(ATP binding), GO:0006468(protein phosphorylation)	IPR038178(Kringle superfamily),IPR036790(Frizzled cysteine-rich domain superfamily),IPR020635(Tyrosine-protein kinase, catalytic domain),IPR020067(Frizzled domain),IPR018056(Kringle, conserved site),IPR017441(Protein kinase, ATP binding site),IPR013806(Kringle-like fold),IPR011009(Protein kinase-like domain superfamily),IPR008266(Tyrosine-protein kinase, active site),IPR001245(Serine-threonine/ty…	PF00051(Kringle domain), PF01392(Fz domain), PF07714(Protein tyrosine and serine/threonine kinase)	Null	1LUF_A Crystal Structure of the MuSK Tyrosine Kinase: Insights into Receptor Autoregulation [Rattus norvegicus]	Null	Null	Pxyl016995.1 Tyrosine-protein kinase transmembrane receptor Ror2 OS=Drosophila melanogaster OX=7227 GN=Nrk PE=1 SV=2	Null	TRINITY_GG_99_c2_g1_i1
g4674.t1	(pident:70.349) XP_013141450.1 PREDICTED: uncharacterized protein C2orf47 homolog, mitochondrial-like [Papilio polytes]	(pident:70.35) PREDICTED: uncharacterized protein C2orf47 homolog, mitochondrial-like [Papilio polytes]	Null	Null	Null	Null	Null	Null	Null	Null	Null	Cpie015831.1 m-AAA protease-interacting protein 1, mitochondrial OS=Mus musculus OX=10090 GN=Maip1 PE=1 SV=1	Null	TRINITY_GG_99_c1_g1_i1
g4678.t1	(pident:87.619) XP_039748526.1 general transcription factor IIE subunit 1 [Pararge aegeria]	(pident:87.89) PREDICTED: general transcription factor IIE subunit 1 [Amyelois transitella]	Null	(pident:41.629) Full=General transcription factor IIE subunit 1; AltName: Full=Transcription initiation factor IIE subunit alpha; Short=TFIIE-alpha [Pongo abelii]	GO:0006367(transcription initiation from RNA polymerase II promoter)	IPR039997(Transcription factor E),IPR024550(TFIIEalpha/SarR/Rpc3 HTH domain),IPR021600(Transcription factor TFIIE alpha subunit, C-terminal),IPR017919(Transcription factor TFE/TFIIEalpha HTH domain),IPR013137(Zinc finger, TFIIB-type),IPR013083(Zinc finger, RING/FYVE/PHD-type),IPR002853(Transcription initiation factor IIE subunit alpha, N-terminal)	PF02002(TFIIE alpha subunit), PF08271(TFIIB zinc-binding), PF11521(C-terminal general transcription factor TFIIE alpha)	Null	7NVX_W Chain W, General transcription factor IIE subunit 1 [Homo sapiens]	Null	Null	Atrn001837.1 General transcription factor IIE subunit 1 OS=Bos taurus OX=9913 GN=GTF2E1 PE=2 SV=1	Null	TRINITY_GG_99_c0_g2_i1
g4676.t1	(pident:86.122) XP_028032539.1 rab-like protein 3 [Bombyx mandarina]	(pident:86.12) rab-like protein 3 isoform X1 [Bombyx mori]<>rab-like protein 3 [Bombyx mandarina]	Null	(pident:51.982) Full=Rab-like protein 3 [Mus musculus]	GO:0003924(GTPase activity), GO:0005525(GTP binding)	IPR027417(P-loop containing nucleoside triphosphate hydrolase),IPR001806(Small GTPase)	PF00071(Ras family)	Null	6VIH_A The ligand-free structure of mouse RABL3 [Mus musculus] /6VIH_B The ligand-free structure of mouse RABL3 [Mus musculus] /6VII_A Crystal structure of mouse RABL3 in complex with GTPgammaS [Mus musculus] /6VII_B Crystal structure of mouse RABL3 in complex with GTPgammaS [Mus musculus] /6VIJ_A Crystal structure of mouse RABL3 in complex with GDP [Mus musculus] /6VIJ_B Crystal structure of mou…	Null	Null	Dpun012463.1 Rab-like protein 3 OS=Mus musculus OX=10090 GN=Rabl3 PE=1 SV=1	Null	TRINITY_GG_99_c0_g1_i8utrorf
g4675.t1	(pident:62.629) XP_026486116.1 beta-1,3-glucan-binding protein-like isoform X1 [Vanessa tameamea]	(pident:69.27) beta-1,3-glucanase [Colias eurytheme]	(pident:52.29) family 16 glycosylhydrolase [Vibrio parahaemolyticus]	(pident:50.592) Full=Beta-1,3-glucan-binding protein; Short=GBP; Flags: Precursor [Penaeus monodon]	GO:0004553(hydrolase activity, hydrolyzing O-glycosyl compounds), GO:0005975(carbohydrate metabolic process)	IPR013320(Concanavalin A-like lectin/glucanase domain superfamily),IPR000757(Glycoside hydrolase family 16)	PF00722(Glycosyl hydrolases family 16)	protein_Group:_1938,_ProteinID:_2161,_lgP:_94.82,_Coverage:_7,_#Peptides:_2,_#Unique:_2,_PTM:_N,_Avg.Mass:_47470	Null	Null	ACI32831.1 beta-1,3-glucanase [Colias eurytheme]	Psen013186.1 Beta-1,3-glucan-binding protein OS=Penaeus monodon OX=6687 PE=2 SV=1	Null	TRINITY_GG_99_c0_g1_i12
g2214.t1	(pident:63.934) CAB3255740.1 unnamed protein product [Arctia plantaginis]	(pident:68.97) unnamed protein product [Danaus chrysippus]	Null	(pident:62.963) Full=Homeobox protein vnd; AltName: Full=Homeobox protein NK-2; AltName: Full=Protein ventral nervous system defective [Drosophila melanogaster]	Null	Null	Null	Null	Null	Null	Null	Cpie033539.1 Putative uncharacterized protein	Null	TRINITY_GG_989_c9_g1_i1
g2217.t1	(pident:61.224) CAG9100789.1 unnamed protein product [Plutella xylostella]	Null	Null	Null	Null	Null	Null	Null	Null	Null	Null	Null	Null	TRINITY_GG_989_c9_g1_i1
g30746.t1	(pident:68.407) CAG9583236.1 unnamed protein product [Danaus chrysippus]	(pident:71.16) unnamed protein product [Danaus chrysippus]	Null	(pident:66.667) Full=Homeobox protein XENK-2 [Xenopus laevis]	GO:0000981(DNA-binding transcription factor activity, RNA polymerase II-specific), GO:0003677(DNA binding), GO:0006355(regulation of transcription, DNA-templated)	IPR020479(Homeobox domain, metazoa),IPR017970(Homeobox, conserved site),IPR009057(Homeobox-like domain superfamily),IPR001356(Homeobox domain)	PF00046(Homeodomain)	Null	1NK2_P Chain P, HOMEOBOX PROTEIN VND [Drosophila melanogaster] /1NK3_P Chain P, HOMEOBOX PROTEIN VND [Drosophila melanogaster] /1VND_A Chain A, VND/NK-2 PROTEIN [Drosophila melanogaster]	Null	Null	Csas011450.1 Homeobox protein XENK-2 OS=Xenopus laevis OX=8355 PE=2 SV=1	Null	TRINITY_GG_989_c9_g1_i1
g2218.t1	(pident:75.902) CAG9100793.1 unnamed protein product [Plutella xylostella]	(pident:75.90) vam6/Vps39-like protein [Plutella xylostella]<>hypothetical protein JYU34_013536 [Plutella xylostella]<>unnamed protein product [Plutella xylostella]	Null	(pident:42.506) Full=Vam6/Vps39-like protein [Mus musculus]	GO:0005515(protein binding), GO:0006886(intracellular protein transport), GO:0016192(vesicle-mediated transport)	IPR036322(WD40-repeat-containing domain superfamily),IPR032914(Vam6/VPS39/TRAP1 family),IPR019453(Vacuolar sorting protein 39/Transforming growth factor beta receptor-associated domain 2),IPR019452(Vacuolar sorting protein 39/Transforming growth factor beta receptor-associated domain 1),IPR001180(Citron homology (CNH) domain),IPR000547(Clathrin, heavy chain/VPS, 7-fold repeat)	PF00637(Region in Clathrin and VPS), PF00780(CNH domain), PF10366(Vacuolar sorting protein 39 domain 1), PF10367(Vacuolar sorting protein 39 domain 2)	Null	Null	Null	Null	Pxyl024388.1 Vam6/Vps39-like protein OS=Mus musculus OX=10090 GN=Vps39 PE=1 SV=1	Null	TRINITY_GG_989_c3_g1_i1
g30743.t1	(pident:75.902) CAG9100793.1 unnamed protein product [Plutella xylostella]	(pident:75.90) vam6/Vps39-like protein [Plutella xylostella]<>hypothetical protein JYU34_013536 [Plutella xylostella]<>unnamed protein product [Plutella xylostella]	Null	(pident:42.506) Full=Vam6/Vps39-like protein [Mus musculus]	GO:0005515(protein binding), GO:0006886(intracellular protein transport), GO:0016192(vesicle-mediated transport)	IPR036322(WD40-repeat-containing domain superfamily),IPR032914(Vam6/VPS39/TRAP1 family),IPR019453(Vacuolar sorting protein 39/Transforming growth factor beta receptor-associated domain 2),IPR019452(Vacuolar sorting protein 39/Transforming growth factor beta receptor-associated domain 1),IPR001180(Citron homology (CNH) domain),IPR000547(Clathrin, heavy chain/VPS, 7-fold repeat)	PF00637(Region in Clathrin and VPS), PF00780(CNH domain), PF10366(Vacuolar sorting protein 39 domain 1), PF10367(Vacuolar sorting protein 39 domain 2)	Null	Null	Null	Null	Pxyl024388.1 Vam6/Vps39-like protein OS=Mus musculus OX=10090 GN=Vps39 PE=1 SV=1	Null	TRINITY_GG_989_c3_g1_i1
g30744.t1	(pident:76.725) CAG4945545.1 unnamed protein product [Parnassius apollo]	(pident:76.73) unnamed protein product [Parnassius apollo]	Null	(pident:43.478) Full=Vam6/Vps39-like protein [Mus musculus]	GO:0006886(intracellular protein transport), GO:0016192(vesicle-mediated transport)	IPR032914(Vam6/VPS39/TRAP1 family),IPR019453(Vacuolar sorting protein 39/Transforming growth factor beta receptor-associated domain 2),IPR019452(Vacuolar sorting protein 39/Transforming growth factor beta receptor-associated domain 1),IPR001180(Citron homology (CNH) domain),IPR000547(Clathrin, heavy chain/VPS, 7-fold repeat)	PF00637(Region in Clathrin and VPS), PF00780(CNH domain), PF10366(Vacuolar sorting protein 39 domain 1), PF10367(Vacuolar sorting protein 39 domain 2)	Null	Null	Null	Null	Papo003108.1 Vam6/Vps39-like protein OS=Mus musculus OX=10090 GN=Vps39 PE=1 SV=1	Null	TRINITY_GG_989_c3_g1_i1
g2209.t1	(pident:51.435) XP_034832900.1 uncharacterized protein LOC117989620 isoform X2 [Maniola hyperantus]	(pident:54.74) uncharacterized protein LOC114350045 isoform X2 [Ostrinia furnacalis]	Null	Null	Null	Null	Null	Null	Null	Null	Null	Gmel006318.1 Putative uncharacterized protein	Null	TRINITY_GG_989_c2_g1_i2
g2209.t2	(pident:50.835) XP_034832899.1 uncharacterized protein LOC117989620 isoform X1 [Maniola hyperantus]	(pident:54.50) uncharacterized protein LOC114350045 isoform X2 [Ostrinia furnacalis]	Null	Null	Null	Null	Null	Null	Null	Null	Null	Gmel006318.1 Putative uncharacterized protein	Null	TRINITY_GG_989_c2_g1_i2
g25276.t1	(pident:58.333) CAB3255723.1 unnamed protein product [Arctia plantaginis]	(pident:58.45) uncharacterized protein LOC114350045 isoform X2 [Ostrinia furnacalis]	Null	Null	Null	Null	Null	Null	Null	Null	Null	Ofur008939.1 Putative uncharacterized protein	Null	TRINITY_GG_989_c2_g1_i2
g2210.t1	(pident:56.208) RVE46624.1 hypothetical protein evm_008697 [Chilo suppressalis]	(pident:51.53) nuclear factor related to kappa-B-binding protein-like [Plutella xylostella]<>unnamed protein product [Plutella xylostella]	Null	(pident:34.328) Full=Nuclear factor related to kappa-B-binding protein; AltName: Full=DNA-binding protein R kappa-B [Mus musculus]	GO:0031011(Ino80 complex)	IPR044867(DEUBAD domain),IPR038106(NFRKB winged helix-like domain superfamily),IPR025220(NFRKB winged helix-like domain),IPR024867(Nuclear factor related to kappa-B-binding protein)	PF14465(NFRKB Winged Helix-like)	protein_Group:_2489,_ProteinID:_1984,_lgP:_26.87,_Coverage:_1,_#Peptides:_2,_#Unique:_1,_PTM:_N,_Avg.Mass:_167526	Null	Null	Null	Papo003103.1 Nuclear factor related to kappa-B-binding protein OS=Homo sapiens OX=9606 GN=NFRKB PE=1 SV=2	Null	TRINITY_GG_989_c1_g2_i1
g2210.t2	(pident:55.482) RVE46624.1 hypothetical protein evm_008697 [Chilo suppressalis]	(pident:50.76) nuclear factor related to kappa-B-binding protein-like [Plutella xylostella]<>unnamed protein product [Plutella xylostella]	Null	(pident:34.328) Full=Nuclear factor related to kappa-B-binding protein; AltName: Full=DNA-binding protein R kappa-B [Mus musculus]	GO:0031011(Ino80 complex)	IPR044867(DEUBAD domain),IPR038106(NFRKB winged helix-like domain superfamily),IPR025220(NFRKB winged helix-like domain),IPR024867(Nuclear factor related to kappa-B-binding protein)	PF14465(NFRKB Winged Helix-like)	Null	Null	Null	Null	Papo003103.1 Nuclear factor related to kappa-B-binding protein OS=Homo sapiens OX=9606 GN=NFRKB PE=1 SV=2	Null	TRINITY_GG_989_c1_g2_i1
g2212.t1	(pident:69.274) CAG9100777.1 unnamed protein product [Plutella xylostella]	(pident:70.62) hypothetical protein JYU34_013545 [Plutella xylostella]	Null	Null	Null	Null	Null	Null	Null	Null	Null	Pxyl024381.1 Putative uncharacterized protein	Null	TRINITY_GG_989_c1_g1_i1utrorf
g2211.t1	(pident:99.691) XP_026330662.1 serine/threonine-protein phosphatase PP1-beta catalytic subunit isoform X1 [Hyposmocoma kahamanoa]	(pident:99.69) serine/threonine-protein phosphatase PP1-beta catalytic subunit isoform X1 [Hyposmocoma kahamanoa]	(pident:94.31) serine/threonine-protein phosphatase [Pararhizobium haloflavum]	(pident:94.801) Full=Serine/threonine-protein phosphatase PP1-beta catalytic subunit; Short=PP-1B [Xenopus tropicalis]<> Full=Serine/threonine-protein phosphatase PP1-beta catalytic subunit; Short=PP-1B [Xenopus laevis]	GO:0016787(hydrolase activity)	IPR031675(Serine-threonine protein phosphatase, N-terminal),IPR029052(Metallo-dependent phosphatase-like),IPR006186(Serine/threonine-specific protein phosphatase/bis(5-nucleosyl)-tetraphosphatase),IPR004843(Calcineurin-like phosphoesterase domain, ApaH type)	PF00149(Calcineurin-like phosphoesterase), PF16891(Serine-threonine protein phosphatase N-terminal domain)	protein_Group:_912,_ProteinID:_1209,_lgP:_182.14,_Coverage:_19,_#Peptides:_6,_#Unique:_2,_PTM:_Y,_Avg.Mass:_37058	1S70_A Chain A, Serine/threonine protein phosphatase PP1-beta (or delta) catalytic subunit [Homo sapiens]	Q4WJS6#PHI:6753#GlcA#746128#Aspergillus_fumigatus#lethal	QHO46828.1 putative protein phosphatase 2C [Arachis hypogaea]	Hkah011775.1 Serine/threonine-protein phosphatase PP1-beta catalytic subunit OS=Xenopus laevis OX=8355 GN=ppp1cb PE=2 SV=1	Null	TRINITY_GG_989_c1_g1_i11
g2213.t1	(pident:79.697) CAG9583235.1 unnamed protein product [Danaus chrysippus]	(pident:79.70) unnamed protein product [Danaus chrysippus]	(pident:82.98) hypothetical protein, partial [Nocardioides antri]	Null	Null	IPR031828(Myofilin)	PF15929(Myofilin)	protein_Group:_44,_ProteinID:_104,_lgP:_343.51,_Coverage:_68,_#Peptides:_34,_#Unique:_21,_PTM:_Y,_Avg.Mass:_44715	Null	Null	Null	cpo082590.1 Putative uncharacterized protein	Null	TRINITY_GG_989_c0_g1_i11
g2213.t2	(pident:79.193) XP_032517969.1 uncharacterized protein LOC116770551 isoform X2 [Danaus plexippus plexippus]	(pident:80.97) uncharacterized protein LOC116770551 isoform X2 [Danaus plexippus plexippus]	(pident:82.98) hypothetical protein, partial [Nocardioides antri]	Null	Null	IPR031828(Myofilin)	PF15929(Myofilin)	Null	Null	Null	Null	cpo082590.1 Putative uncharacterized protein	Null	TRINITY_GG_989_c0_g1_i11
g2213.t3	(pident:83.137) XP_026730380.1 uncharacterized protein LOC113495696 isoform X4 [Trichoplusia ni]	(pident:82.40) uncharacterized protein LOC115441862 isoform X4 [Manduca sexta]<>hypothetical protein O3G_MSEX001647 [Manduca sexta]<>hypothetical protein O3G_MSEX001647 [Manduca sexta]<>hypothetical protein O3G_MSEX001647 [Manduca sexta]	(pident:82.98) hypothetical protein, partial [Nocardioides antri]	Null	Null	IPR031828(Myofilin)	PF15929(Myofilin)	Null	Null	Null	Null	Hmel001016.1 Putative uncharacterized protein	Null	TRINITY_GG_989_c0_g1_i11
g30748.t1	(pident:76.056) XP_026730381.1 uncharacterized protein LOC113495696 isoform X5 [Trichoplusia ni]	(pident:76.06) uncharacterized protein LOC113495696 isoform X5 [Trichoplusia ni]	(pident:71.68) hypothetical protein, partial [Escherichia coli]	Null	Null	IPR031828(Myofilin)	PF15929(Myofilin)	protein_Group:_149,_ProteinID:_538,_lgP:_217.10,_Coverage:_66,_#Peptides:_13,_#Unique:_2,_PTM:_Y,_Avg.Mass:_16370	Null	Null	Null	Darc012671.1 Putative uncharacterized protein	Null	TRINITY_GG_989_c0_g1_i11
g16567.t1	(pident:55.030) XP_023935313.1 aldo-keto reductase AKR2E4-like [Bicyclus anynana]	(pident:56.13) aldo-keto reductase AKR2E4-like [Zerene cesonia]	(pident:54.69) aldo/keto reductase, partial [Microbacterium arborescens]	(pident:40.453) Full=Aldo-keto reductase AKR2E4; AltName: Full=3-dehydroecdysone reductase; AltName: Full=Aldo-keto reductase 2E [Bombyx mori]	GO:0016491(oxidoreductase activity)	IPR036812(NADP-dependent oxidoreductase domain superfamily),IPR023210(NADP-dependent oxidoreductase domain),IPR020471(Aldo-keto reductase),IPR018170(Aldo/keto reductase, conserved site)	PF00248(Aldo/keto reductase family)	Null	Null	Null	Null	Lcam023637.1 Aldo-keto reductase AKR2E4 OS=Bombyx mori OX=7091 GN=akr2e PE=1 SV=1	Null	TRINITY_GG_985_c8_g1_i2
g26074.t1	(pident:55.556) XP_038217759.1 aldo-keto reductase AKR2E4-like [Zerene cesonia]	(pident:55.56) aldo-keto reductase AKR2E4-like [Zerene cesonia]	(pident:54.69) aldo/keto reductase, partial [Microbacterium arborescens]	(pident:40.453) Full=Aldo-keto reductase AKR2E4; AltName: Full=3-dehydroecdysone reductase; AltName: Full=Aldo-keto reductase 2E [Bombyx mori]	GO:0016491(oxidoreductase activity)	IPR036812(NADP-dependent oxidoreductase domain superfamily),IPR023210(NADP-dependent oxidoreductase domain),IPR020471(Aldo-keto reductase),IPR018170(Aldo/keto reductase, conserved site)	PF00248(Aldo/keto reductase family)	Null	Null	Null	Null	Lcam023637.1 Aldo-keto reductase AKR2E4 OS=Bombyx mori OX=7091 GN=akr2e PE=1 SV=1	Null	TRINITY_GG_985_c8_g1_i2
g16564.t1	(pident:53.917) XP_026750282.1 fibrohexamerin [Galleria mellonella]	(pident:58.08) fibrohexamerin [Galleria mellonella]	(pident:53.62) hypothetical protein, partial [Chitinophaga agrisoli]	(pident:53.917) Full=Fibrohexamerin; AltName: Full=25 kDa silk glycoprotein; AltName: Full=p25; Flags: Precursor [Galleria mellonella]	GO:0005198(structural molecule activity), GO:0005576(extracellular region)	IPR009911(Fibroin P25)	PF07294(Fibroin P25)	protein_Group:_1894,_ProteinID:_1876,_lgP:_81.10,_Coverage:_8,_#Peptides:_2,_#Unique:_2,_PTM:_N,_Avg.Mass:_25555	Null	Null	Null	Zfil014130.1 Fibrohexamerin OS=Galleria mellonella OX=7137 GN=P25 PE=1 SV=1	Null	TRINITY_GG_985_c4_g1_i2
g3976.t1	(pident:53.917) XP_026750282.1 fibrohexamerin [Galleria mellonella]	(pident:56.65) fibrohexamerin-like [Vanessa tameamea]	(pident:55.47) hypothetical protein, partial [Chitinophaga agrisoli]	(pident:53.917) Full=Fibrohexamerin; AltName: Full=25 kDa silk glycoprotein; AltName: Full=p25; Flags: Precursor [Galleria mellonella]	GO:0005198(structural molecule activity), GO:0005576(extracellular region)	IPR009911(Fibroin P25)	PF07294(Fibroin P25)	protein_Group:_1894,_ProteinID:_1875,_lgP:_81.10,_Coverage:_8,_#Peptides:_2,_#Unique:_2,_PTM:_N,_Avg.Mass:_25596	Null	Null	Null	Zfil014130.1 Fibrohexamerin OS=Galleria mellonella OX=7137 GN=P25 PE=1 SV=1	Null	TRINITY_GG_985_c4_g1_i2
g26072.t1	(pident:40.584) XP_013177432.1 PREDICTED: uncharacterized protein LOC106124939 isoform X1 [Papilio xuthus]	(pident:40.96) Cyclic AMP-dependent transcription factor ATF-2 [Papilio xuthus]	Null	(pident:60.494) Full=Cyclic AMP-dependent transcription factor ATF-2; Short=cAMP-dependent transcription factor ATF-2; AltName: Full=Activating transcription factor 2; AltName: Full=cAMP response element-binding protein CRE-BP1 [Rattus norvegicus]	GO:0003700(DNA-binding transcription factor activity), GO:0005634(nucleus), GO:0006357(regulation of transcription by RNA polymerase II)	IPR036236(Zinc finger C2H2 superfamily),IPR029836(cAMP-dependent transcription factor ATF-2),IPR013087(Zinc finger C2H2-type)	Null	Null	Null	Null	Null	Pxyl006012.1 Cyclic AMP-dependent transcription factor ATF-2 OS=Rattus norvegicus OX=10116 GN=Atf2 PE=1 SV=2	Null	TRINITY_GG_985_c38_g1_i1
g16565.t1	(pident:71.886) XP_035455847.1 CLIP-associating protein-like [Spodoptera frugiperda]	(pident:72.72) CLIP-associating protein isoform X1 [Trichoplusia ni]	Null	(pident:37.324) Full=CLIP-associating protein; AltName: Full=Misexpression suppressor of ras 7; AltName: Full=Protein Multiple asters; Short=Mast; AltName: Full=Protein Orbit; AltName: Full=Protein chromosome bows [Drosophila melanogaster]	GO:0005828(kinetochore microtubule), GO:0005881(cytoplasmic microtubule), GO:0043515(kinetochore binding), GO:0051010(microtubule plus-end binding)	IPR036236(Zinc finger C2H2 superfamily),IPR034085(TOG domain),IPR028399(CLIP-associating protein 1),IPR024395(CLASP N-terminal domain),IPR021133(HEAT, type 2),IPR016024(Armadillo-type fold),IPR013087(Zinc finger C2H2-type),IPR011989(Armadillo-like helical)	PF12348(CLASP N terminal)	Null	Null	Null	Null	Tni009252.1 CLIP-associating protein OS=Drosophila melanogaster OX=7227 GN=chb PE=1 SV=1	Null	TRINITY_GG_985_c3_g1_i5
g16565.t2	(pident:71.954) XP_035455847.1 CLIP-associating protein-like [Spodoptera frugiperda]	(pident:72.79) CLIP-associating protein isoform X1 [Trichoplusia ni]	Null	(pident:37.388) Full=CLIP-associating protein; AltName: Full=Misexpression suppressor of ras 7; AltName: Full=Protein Multiple asters; Short=Mast; AltName: Full=Protein Orbit; AltName: Full=Protein chromosome bows [Drosophila melanogaster]	GO:0005828(kinetochore microtubule), GO:0005881(cytoplasmic microtubule), GO:0043515(kinetochore binding), GO:0051010(microtubule plus-end binding)	IPR036236(Zinc finger C2H2 superfamily),IPR034085(TOG domain),IPR028399(CLIP-associating protein 1),IPR024395(CLASP N-terminal domain),IPR021133(HEAT, type 2),IPR016024(Armadillo-type fold),IPR013087(Zinc finger C2H2-type),IPR011989(Armadillo-like helical)	PF12348(CLASP N terminal)	Null	Null	Null	Null	Tni009252.1 CLIP-associating protein OS=Drosophila melanogaster OX=7227 GN=chb PE=1 SV=1	Null	TRINITY_GG_985_c3_g1_i5
g16566.t1	(pident:43.003) XP_037296085.1 protein prune homolog 2-like isoform X2 [Manduca sexta]	(pident:45.37) hypothetical protein evm_005599 [Chilo suppressalis]	Null	(pident:49.495) Full=Protein prune homolog 2; AltName: Full=BNIP2 motif-containing molecule at the C-terminal region 1 [Rattus norvegicus]	Null	IPR036865(CRAL-TRIO lipid binding domain superfamily),IPR022181(Bcl2-/adenovirus E1B 19kDa-interacting protein 2),IPR001251(CRAL-TRIO lipid binding domain)	PF12496(Bcl2-/adenovirus E1B nineteen kDa-interacting protein 2), PF13716(Divergent CRAL/TRIO domain)	Null	Null	Null	Null	Null	Null	TRINITY_GG_985_c19_g1_i2
g26073.t1	(pident:45.234) XP_037296085.1 protein prune homolog 2-like isoform X2 [Manduca sexta]	(pident:43.87) protein prune homolog 2 isoform X2 [Vanessa tameamea]	Null	(pident:49.495) Full=Protein prune homolog 2; AltName: Full=BNIP2 motif-containing molecule at the C-terminal region 1 [Rattus norvegicus]	Null	IPR036865(CRAL-TRIO lipid binding domain superfamily),IPR022181(Bcl2-/adenovirus E1B 19kDa-interacting protein 2),IPR001251(CRAL-TRIO lipid binding domain)	PF12496(Bcl2-/adenovirus E1B nineteen kDa-interacting protein 2), PF13716(Divergent CRAL/TRIO domain)	Null	Null	Null	Null	Null	Null	TRINITY_GG_985_c19_g1_i2
g16569.t1	Null	Null	Null	Null	Null	Null	Null	Null	Null	Null	Null	Null	Null	TRINITY_GG_985_c15_g1_i5
g16569.t2	Null	Null	Null	Null	Null	Null	Null	Null	Null	Null	Null	Null	Null	TRINITY_GG_985_c15_g1_i5
g26076.t1	Null	Null	Null	Null	Null	Null	Null	Null	Null	Null	Null	Null	Null	TRINITY_GG_985_c15_g1_i5
g16563.t1	(pident:56.471) XP_013176059.1 PREDICTED: LYR motif-containing protein 4 [Papilio xuthus]	(pident:56.47) LYR motif-containing protein 4 [Papilio machaon]	Null	(pident:56.471) Full=LYR motif-containing protein 4 [Xenopus laevis]	GO:0016226(iron-sulfur cluster assembly)	IPR045297(LYRM4, LYR domain),IPR008011(Complex 1 LYR protein domain)	PF05347(Complex 1 protein (LYR family))	Null	5USR_B Crystal structure of human NFS1-ISD11 in complex with E. coli acyl-carrier protein at 3.09 angstroms [Homo sapiens] /5USR_D Crystal structure of human NFS1-ISD11 in complex with E. coli acyl-carrier protein at 3.09 angstroms [Homo sapiens] /5USR_F Crystal structure of human NFS1-ISD11 in complex with E. coli acyl-carrier protein at 3.09 angstroms [Homo sapiens] /5USR_H Crystal structure of…	Null	Null	Hhim019832.1 LYR motif-containing protein 4B OS=Salmo salar OX=8030 GN=lyrm4b PE=3 SV=1	Null	TRINITY_GG_985_c13_g1_i1
g3977.t1	(pident:56.471) XP_013176059.1 PREDICTED: LYR motif-containing protein 4 [Papilio xuthus]	(pident:56.47) LYR motif-containing protein 4 [Papilio machaon]	Null	(pident:56.471) Full=LYR motif-containing protein 4 [Xenopus laevis]	GO:0016226(iron-sulfur cluster assembly)	IPR045297(LYRM4, LYR domain),IPR008011(Complex 1 LYR protein domain)	PF05347(Complex 1 protein (LYR family))	Null	5USR_B Crystal structure of human NFS1-ISD11 in complex with E. coli acyl-carrier protein at 3.09 angstroms [Homo sapiens] /5USR_D Crystal structure of human NFS1-ISD11 in complex with E. coli acyl-carrier protein at 3.09 angstroms [Homo sapiens] /5USR_F Crystal structure of human NFS1-ISD11 in complex with E. coli acyl-carrier protein at 3.09 angstroms [Homo sapiens] /5USR_H Crystal structure of…	Null	Null	Hhim019832.1 LYR motif-containing protein 4B OS=Salmo salar OX=8030 GN=lyrm4b PE=3 SV=1	Null	TRINITY_GG_985_c13_g1_i1
g16562.t1	(pident:41.989) XP_041986072.1 uncharacterized protein LOC121738203 [Aricia agestis]	(pident:44.19) uncharacterized protein LOC123704022 [Colias croceus]	Null	(pident:36.296) Full=UDP-GlcNAc:betaGal beta-1,3-N-acetylglucosaminyltransferase 7; Short=BGnT-7; Short=Beta-1,3-Gn-T7; Short=Beta-1,3-N-acetylglucosaminyltransferase 7; Short=Beta3Gn-T7 [Rattus norvegicus]	GO:0006486(protein glycosylation), GO:0016020(membrane), GO:0016758(transferase activity, transferring hexosyl groups)	IPR002659(Glycosyl transferase, family 31)	PF01762(Galactosyltransferase)	Null	Null	Null	Null	Null	Null	TRINITY_GG_985_c12_g1_i4
g3978.t1	(pident:45.501) CAG5005417.1 unnamed protein product [Parnassius apollo]	(pident:45.56) uncharacterized protein LOC123704022 [Colias croceus]	Null	(pident:35.556) Full=Beta-1,3-galactosyltransferase 1; Short=Beta-1,3-GalTase 1; Short=Beta3Gal-T1; Short=Beta3GalT1; AltName: Full=UDP-Gal:betaGlcNAc beta 1,3-galactosyltransferase-I; AltName: Full=UDP-galactose:beta-N-acetyl-glucosamine-beta-1,3-galactosyltransferase 1 [Mus musculus]<> Full=Beta-1,3-galactosyltransferase 1; Short=Beta-1,3-GalTase 1; Short=Beta3Gal-T1; Short=Beta3GalT1; AltName:…	GO:0006486(protein glycosylation), GO:0016020(membrane), GO:0016758(transferase activity, transferring hexosyl groups)	IPR002659(Glycosyl transferase, family 31)	PF01762(Galactosyltransferase)	Null	Null	Null	Null	Null	Null	TRINITY_GG_985_c12_g1_i4
g6183.t1	(pident:46.961) XP_038217615.1 uncharacterized protein LOC119836382, partial [Zerene cesonia]	(pident:46.77) PREDICTED: uncharacterized protein LOC106124712 isoform X2 [Papilio xuthus]	Null	Null	Null	Null	Null	Null	Null	Null	Null	Sinc019501.1 Beta-1,3-galactosyltransferase 1 OS=Gorilla gorilla gorilla OX=9595 GN=B3GALT1 PE=3 SV=1	Null	TRINITY_GG_985_c12_g1_i4
g6184.t1	(pident:42.901) XP_026483866.1 uncharacterized protein LOC113391929 isoform X1 [Vanessa tameamea]	(pident:43.12) uncharacterized protein LOC113391929 isoform X1 [Vanessa tameamea]	Null	(pident:35.789) Full=Beta-1,3-galactosyltransferase 1; Short=Beta-1,3-GalTase 1; Short=Beta3Gal-T1; Short=Beta3GalT1; AltName: Full=UDP-Gal:betaGlcNAc beta 1,3-galactosyltransferase-I; AltName: Full=UDP-galactose:beta-N-acetyl-glucosamine-beta-1,3-galactosyltransferase 1 [Mus musculus]<> Full=Beta-1,3-galactosyltransferase 1; Short=Beta-1,3-GalTase 1; Short=Beta3Gal-T1; Short=Beta3GalT1; AltName:…	GO:0006486(protein glycosylation), GO:0016020(membrane), GO:0016758(transferase activity, transferring hexosyl groups)	IPR002659(Glycosyl transferase, family 31)	PF01762(Galactosyltransferase)	Null	Null	Null	Null	Null	Null	TRINITY_GG_985_c12_g1_i4
g16570.t1	(pident:91.709) XP_045508213.1 cullin-1 [Colias croceus]	(pident:91.23) cullin-1 [Plutella xylostella]<>Cullin-1 [Plutella xylostella]	(pident:25.34) cullin [Arsenophonus endosymbiont of Bemisia tabaci]	(pident:73.897) Full=Cullin-1; Short=CUL-1 [Homo sapiens]<> Full=Cullin-1; Short=CUL-1 [Pongo abelii]	GO:0006511(ubiquitin-dependent protein catabolic process), GO:0031461(cullin-RING ubiquitin ligase complex), GO:0031625(ubiquitin protein ligase binding)	IPR045093(Cullin),IPR036390(Winged helix DNA-binding domain superfamily),IPR036388(Winged helix-like DNA-binding domain superfamily),IPR036317(Cullin homology domain superfamily),IPR019559(Cullin protein, neddylation domain),IPR016159(Cullin repeat-like-containing domain superfamily),IPR016158(Cullin homology domain),IPR016157(Cullin, conserved site),IPR001373(Cullin, N-terminal)	PF00888(Cullin family), PF10557(Cullin protein neddylation domain)	Null	1U6G_A Crystal Structure of The Cand1-Cul1-Roc1 Complex [Homo sapiens] /6TTU_C Ubiquitin Ligation to substrate by a cullin-RING E3 ligase at 3.7A resolution: NEDD8-CUL1-RBX1 N98R-SKP1-monomeric b-TRCP1dD-IkBa-UB~UBE2D2 [Homo sapiens] /7B5L_C Chain C, Cullin-1 [Homo sapiens] /7B5M_C Chain C, Cullin-1 [Homo sapiens] /7B5N_C Chain C, Cullin-1 [Homo sapiens] /7B5R_C Chain C, Cullin-1 [Homo sapiens] /…	Null	Null	Ccro002758.1 Cullin-1 OS=Mus musculus OX=10090 GN=Cul1 PE=1 SV=1	Null	TRINITY_GG_985_c1_g3_i1
g16570.t2	(pident:86.836) XP_045508213.1 cullin-1 [Colias croceus]	(pident:86.04) cullin-1 [Plutella xylostella]<>Cullin-1 [Plutella xylostella]	(pident:25.34) cullin [Arsenophonus endosymbiont of Bemisia tabaci]	(pident:70.012) Full=Cullin-1; Short=CUL-1 [Homo sapiens]<> Full=Cullin-1; Short=CUL-1 [Pongo abelii]	GO:0006511(ubiquitin-dependent protein catabolic process), GO:0031461(cullin-RING ubiquitin ligase complex), GO:0031625(ubiquitin protein ligase binding)	IPR045093(Cullin),IPR036390(Winged helix DNA-binding domain superfamily),IPR036388(Winged helix-like DNA-binding domain superfamily),IPR036317(Cullin homology domain superfamily),IPR019559(Cullin protein, neddylation domain),IPR016159(Cullin repeat-like-containing domain superfamily),IPR016158(Cullin homology domain),IPR016157(Cullin, conserved site),IPR001373(Cullin, N-terminal)	PF00888(Cullin family), PF10557(Cullin protein neddylation domain)	Null	1U6G_A Crystal Structure of The Cand1-Cul1-Roc1 Complex [Homo sapiens] /6TTU_C Ubiquitin Ligation to substrate by a cullin-RING E3 ligase at 3.7A resolution: NEDD8-CUL1-RBX1 N98R-SKP1-monomeric b-TRCP1dD-IkBa-UB~UBE2D2 [Homo sapiens] /7B5L_C Chain C, Cullin-1 [Homo sapiens] /7B5M_C Chain C, Cullin-1 [Homo sapiens] /7B5N_C Chain C, Cullin-1 [Homo sapiens] /7B5R_C Chain C, Cullin-1 [Homo sapiens] /…	Null	Null	Ccro002758.1 Cullin-1 OS=Mus musculus OX=10090 GN=Cul1 PE=1 SV=1	Null	TRINITY_GG_985_c1_g3_i1
g26077.t1	(pident:91.709) XP_045508213.1 cullin-1 [Colias croceus]	(pident:91.23) cullin-1 [Plutella xylostella]<>Cullin-1 [Plutella xylostella]	(pident:25.34) cullin [Arsenophonus endosymbiont of Bemisia tabaci]	(pident:74.023) Full=Cullin-1; Short=CUL-1 [Homo sapiens]<> Full=Cullin-1; Short=CUL-1 [Pongo abelii]	GO:0006511(ubiquitin-dependent protein catabolic process), GO:0031461(cullin-RING ubiquitin ligase complex), GO:0031625(ubiquitin protein ligase binding)	IPR045093(Cullin),IPR036390(Winged helix DNA-binding domain superfamily),IPR036388(Winged helix-like DNA-binding domain superfamily),IPR036317(Cullin homology domain superfamily),IPR019559(Cullin protein, neddylation domain),IPR016159(Cullin repeat-like-containing domain superfamily),IPR016158(Cullin homology domain),IPR016157(Cullin, conserved site),IPR001373(Cullin, N-terminal)	PF00888(Cullin family), PF10557(Cullin protein neddylation domain)	Null	1U6G_A Crystal Structure of The Cand1-Cul1-Roc1 Complex [Homo sapiens] /6TTU_C Ubiquitin Ligation to substrate by a cullin-RING E3 ligase at 3.7A resolution: NEDD8-CUL1-RBX1 N98R-SKP1-monomeric b-TRCP1dD-IkBa-UB~UBE2D2 [Homo sapiens] /7B5L_C Chain C, Cullin-1 [Homo sapiens] /7B5M_C Chain C, Cullin-1 [Homo sapiens] /7B5N_C Chain C, Cullin-1 [Homo sapiens] /7B5R_C Chain C, Cullin-1 [Homo sapiens] /…	Null	Null	Ccro002758.1 Cullin-1 OS=Mus musculus OX=10090 GN=Cul1 PE=1 SV=1	Null	TRINITY_GG_985_c1_g3_i1
g26077.t2	(pident:86.473) XP_045508213.1 cullin-1 [Colias croceus]	(pident:85.92) cullin-1 [Plutella xylostella]<>Cullin-1 [Plutella xylostella]	(pident:25.34) cullin [Arsenophonus endosymbiont of Bemisia tabaci]	(pident:69.773) Full=Cullin-1; Short=CUL-1 [Homo sapiens]<> Full=Cullin-1; Short=CUL-1 [Pongo abelii]	GO:0006511(ubiquitin-dependent protein catabolic process), GO:0031461(cullin-RING ubiquitin ligase complex), GO:0031625(ubiquitin protein ligase binding)	IPR045093(Cullin),IPR036390(Winged helix DNA-binding domain superfamily),IPR036388(Winged helix-like DNA-binding domain superfamily),IPR036317(Cullin homology domain superfamily),IPR019559(Cullin protein, neddylation domain),IPR016159(Cullin repeat-like-containing domain superfamily),IPR016158(Cullin homology domain),IPR016157(Cullin, conserved site),IPR001373(Cullin, N-terminal)	PF00888(Cullin family), PF10557(Cullin protein neddylation domain)	Null	1U6G_A Crystal Structure of The Cand1-Cul1-Roc1 Complex [Homo sapiens] /6TTU_C Ubiquitin Ligation to substrate by a cullin-RING E3 ligase at 3.7A resolution: NEDD8-CUL1-RBX1 N98R-SKP1-monomeric b-TRCP1dD-IkBa-UB~UBE2D2 [Homo sapiens] /7B5L_C Chain C, Cullin-1 [Homo sapiens] /7B5M_C Chain C, Cullin-1 [Homo sapiens] /7B5N_C Chain C, Cullin-1 [Homo sapiens] /7B5R_C Chain C, Cullin-1 [Homo sapiens] /…	Null	Null	Ccro002758.1 Cullin-1 OS=Mus musculus OX=10090 GN=Cul1 PE=1 SV=1	Null	TRINITY_GG_985_c1_g3_i1
g26077.t3	(pident:86.473) XP_045508213.1 cullin-1 [Colias croceus]	(pident:85.92) cullin-1 [Plutella xylostella]<>Cullin-1 [Plutella xylostella]	(pident:25.34) cullin [Arsenophonus endosymbiont of Bemisia tabaci]	(pident:69.773) Full=Cullin-1; Short=CUL-1 [Homo sapiens]<> Full=Cullin-1; Short=CUL-1 [Pongo abelii]	GO:0006511(ubiquitin-dependent protein catabolic process), GO:0031461(cullin-RING ubiquitin ligase complex), GO:0031625(ubiquitin protein ligase binding)	IPR045093(Cullin),IPR036390(Winged helix DNA-binding domain superfamily),IPR036388(Winged helix-like DNA-binding domain superfamily),IPR036317(Cullin homology domain superfamily),IPR019559(Cullin protein, neddylation domain),IPR016159(Cullin repeat-like-containing domain superfamily),IPR016158(Cullin homology domain),IPR016157(Cullin, conserved site),IPR001373(Cullin, N-terminal)	PF00888(Cullin family), PF10557(Cullin protein neddylation domain)	Null	1U6G_A Crystal Structure of The Cand1-Cul1-Roc1 Complex [Homo sapiens] /6TTU_C Ubiquitin Ligation to substrate by a cullin-RING E3 ligase at 3.7A resolution: NEDD8-CUL1-RBX1 N98R-SKP1-monomeric b-TRCP1dD-IkBa-UB~UBE2D2 [Homo sapiens] /7B5L_C Chain C, Cullin-1 [Homo sapiens] /7B5M_C Chain C, Cullin-1 [Homo sapiens] /7B5N_C Chain C, Cullin-1 [Homo sapiens] /7B5R_C Chain C, Cullin-1 [Homo sapiens] /…	Null	Null	Ccro002758.1 Cullin-1 OS=Mus musculus OX=10090 GN=Cul1 PE=1 SV=1	Null	TRINITY_GG_985_c1_g3_i1
g26077.t4	(pident:87.363) XP_045508213.1 cullin-1 [Colias croceus]	(pident:86.56) cullin-1 [Plutella xylostella]<>Cullin-1 [Plutella xylostella]	(pident:25.34) cullin [Arsenophonus endosymbiont of Bemisia tabaci]	(pident:70.553) Full=Cullin-1; Short=CUL-1 [Homo sapiens]<> Full=Cullin-1; Short=CUL-1 [Pongo abelii]	GO:0006511(ubiquitin-dependent protein catabolic process), GO:0031461(cullin-RING ubiquitin ligase complex), GO:0031625(ubiquitin protein ligase binding)	IPR045093(Cullin),IPR036390(Winged helix DNA-binding domain superfamily),IPR036388(Winged helix-like DNA-binding domain superfamily),IPR036317(Cullin homology domain superfamily),IPR019559(Cullin protein, neddylation domain),IPR016159(Cullin repeat-like-containing domain superfamily),IPR016158(Cullin homology domain),IPR016157(Cullin, conserved site),IPR001373(Cullin, N-terminal)	PF00888(Cullin family), PF10557(Cullin protein neddylation domain)	Null	1U6G_A Crystal Structure of The Cand1-Cul1-Roc1 Complex [Homo sapiens] /6TTU_C Ubiquitin Ligation to substrate by a cullin-RING E3 ligase at 3.7A resolution: NEDD8-CUL1-RBX1 N98R-SKP1-monomeric b-TRCP1dD-IkBa-UB~UBE2D2 [Homo sapiens] /7B5L_C Chain C, Cullin-1 [Homo sapiens] /7B5M_C Chain C, Cullin-1 [Homo sapiens] /7B5N_C Chain C, Cullin-1 [Homo sapiens] /7B5R_C Chain C, Cullin-1 [Homo sapiens] /…	Null	Null	Ccro002758.1 Cullin-1 OS=Mus musculus OX=10090 GN=Cul1 PE=1 SV=1	Null	TRINITY_GG_985_c1_g3_i1
g16571.t1	(pident:77.727) CAF4833459.1 unnamed protein product [Pieris macdunnoughi]	(pident:77.27) hypothetical protein B5V51_1304 [Heliothis virescens]<>hypothetical protein B5V51_1304 [Heliothis virescens]	Null	(pident:39.056) Full=LHFPL tetraspan subfamily member 2a protein [Danio rerio]	Null	IPR019372(Lipoma HMGIC fusion partner-like protein)	PF10242(Lipoma HMGIC fusion partner-like protein)	Null	Null	Null	Null	Csas003049.1 LHFPL tetraspan subfamily member 2a protein OS=Danio rerio OX=7955 GN=lhfpl2a PE=2 SV=1	Null	TRINITY_GG_985_c1_g2_i1
g26078.t1	(pident:77.727) CAF4833459.1 unnamed protein product [Pieris macdunnoughi]	(pident:77.27) hypothetical protein B5V51_1304 [Heliothis virescens]<>hypothetical protein B5V51_1304 [Heliothis virescens]	Null	(pident:39.056) Full=LHFPL tetraspan subfamily member 2a protein [Danio rerio]	Null	IPR019372(Lipoma HMGIC fusion partner-like protein)	PF10242(Lipoma HMGIC fusion partner-like protein)	Null	Null	Null	Null	Csas003049.1 LHFPL tetraspan subfamily member 2a protein OS=Danio rerio OX=7955 GN=lhfpl2a PE=2 SV=1	Null	TRINITY_GG_985_c1_g2_i1
g16568.t1	(pident:68.762) XP_045782703.1 protein ERGIC-53 [Maniola jurtina]	(pident:68.50) protein ERGIC-53 [Maniola jurtina]	Null	(pident:42.827) Full=Protein ERGIC-53; AltName: Full=ER-Golgi intermediate compartment 53 kDa protein; AltName: Full=Lectin mannose-binding 1; AltName: Full=p58; Flags: Precursor [Mus musculus]	GO:0016020(membrane)	IPR013320(Concanavalin A-like lectin/glucanase domain superfamily),IPR005052(Legume-like lectin)	PF03388(Legume-like lectin family)	protein_Group:_646,_ProteinID:_899,_lgP:_157.88,_Coverage:_17,_#Peptides:_9,_#Unique:_8,_PTM:_Y,_Avg.Mass:_55000	1GV9_A p58/ERGIC-53 [Rattus norvegicus]	Null	Null	Bany006833.1 Protein ERGIC-53 OS=Mus musculus OX=10090 GN=Lman1 PE=1 SV=1	Null	TRINITY_GG_985_c1_g1_i2
g26075.t1	(pident:71.906) XP_045782703.1 protein ERGIC-53 [Maniola jurtina]	(pident:71.65) protein ERGIC-53 [Maniola jurtina]	Null	(pident:42.769) Full=Protein ERGIC-53; AltName: Full=ER-Golgi intermediate compartment 53 kDa protein; AltName: Full=Lectin mannose-binding 1; AltName: Full=p58; Flags: Precursor [Mus musculus]	GO:0005537(mannose binding), GO:0006888(endoplasmic reticulum to Golgi vesicle-mediated transport), GO:0016020(membrane)	IPR033085(Protein ERGIC-53),IPR013320(Concanavalin A-like lectin/glucanase domain superfamily),IPR005052(Legume-like lectin)	PF03388(Legume-like lectin family)	protein_Group:_646,_ProteinID:_903,_lgP:_157.88,_Coverage:_16,_#Peptides:_9,_#Unique:_8,_PTM:_Y,_Avg.Mass:_56480	1GV9_A p58/ERGIC-53 [Rattus norvegicus]	Null	Null	Bany006833.1 Protein ERGIC-53 OS=Mus musculus OX=10090 GN=Lman1 PE=1 SV=1	Null	TRINITY_GG_985_c1_g1_i2
g17104.t1	Null	Null	Null	Null	Null	Null	Null	Null	Null	Null	Null	Null	Null	TRINITY_GG_984_c0_g1_i1
g17099.t1	(pident:32.781) XP_038211321.1 phospholipid-transporting ATPase ABCA1-like [Zerene cesonia]	(pident:32.55) unnamed protein product, partial [Brenthis ino]	(pident:34.90) ABC transporter ATP-binding protein [Pseudanabaena sp. BC1403]	(pident:26.810) Full=ATP-binding cassette sub-family A member 17 [Rattus norvegicus]	GO:0005524(ATP binding), GO:0016021(integral component of membrane), GO:0055085(transmembrane transport), GO:0140359(ABC-type transporter activity Gene Ontology Term)	IPR027417(P-loop containing nucleoside triphosphate hydrolase),IPR026082(ABC transporter A),IPR017871(ABC transporter-like, conserved site),IPR003593(AAA+ ATPase domain),IPR003439(ABC transporter-like, ATP-binding domain)	PF00005(ABC transporter), PF12698(ABC-2 family transporter protein)	Null	Null	Null	Null	Null	Null	TRINITY_GG_983_c0_g1_i7
g17103.t1	(pident:30.194) XP_021196765.1 ATP-binding cassette sub-family A member 1-like isoform X2 [Helicoverpa armigera]	(pident:32.12) hypothetical protein HW555_001946 [Spodoptera exigua]	Null	Null	Null	Null	Null	Null	Null	Null	Null	Null	Null	TRINITY_GG_983_c0_g1_i7
g35383.t1	(pident:59.244) XP_026329931.1 ATP-binding cassette sub-family C member Sur-like isoform X2 [Hyposmocoma kahamanoa]	(pident:57.71) ATP-binding cassette sub-family C member Sur-like isoform X1 [Ostrinia furnacalis]	(pident:25.25) ATP-binding cassette domain-containing protein [aff. Roholtiella sp. LEGE 12411]	(pident:24.324) Full=Cystic fibrosis transmembrane conductance regulator; Short=CFTR; AltName: Full=ATP-binding cassette sub-family C member 7; AltName: Full=Channel conductance-controlling ATPase; AltName: Full=cAMP-dependent chloride channel [Sus scrofa]	GO:0005524(ATP binding), GO:0016021(integral component of membrane), GO:0055085(transmembrane transport), GO:0140359(ABC-type transporter activity Gene Ontology Term)	IPR036640(ABC transporter type 1, transmembrane domain superfamily),IPR027417(P-loop containing nucleoside triphosphate hydrolase),IPR011527(ABC transporter type 1, transmembrane domain),IPR003593(AAA+ ATPase domain),IPR003439(ABC transporter-like, ATP-binding domain)	PF00005(ABC transporter), PF00664(ABC transporter transmembrane region)	Null	Null	Null	Null	Ofur007796.1 ATP-binding cassette sub-family C member Sur OS=Drosophila melanogaster OX=7227 GN=Sur PE=1 SV=4	Null	TRINITY_GG_981_c7_g1_i2
g34936.t1	(pident:81.493) XP_028031888.1 phosphatase and actin regulator 4 isoform X6 [Bombyx mandarina]	(pident:84.97) hypothetical protein O3G_MSEX006131 [Manduca sexta]	Null	(pident:57.143) Full=Phosphatase and actin regulator 1 [Gallus gallus]	Null	IPR004018(RPEL repeat)	PF02755(RPEL repeat)	Null	6ZEF_C Chain C, Phosphatase and actin regulator [Homo sapiens] /6ZEF_D Chain D, Phosphatase and actin regulator [Homo sapiens] /6ZEG_C Structure of PP1-IRSp53 chimera [PP1(7-304) + linker (G/S)x9 + IRSp53(449-465)] bound to Phactr1 (516-580) [Homo sapiens] /6ZEG_D Structure of PP1-IRSp53 chimera [PP1(7-304) + linker (G/S)x9 + IRSp53(449-465)] bound to Phactr1 (516-580) [Homo sapiens] /6ZEH_C Stru…	Null	Null	Atrn009463.1 Phosphatase and actin regulator 2 OS=Rattus norvegicus OX=10116 GN=Phactr2 PE=1 SV=1	Null	TRINITY_GG_981_c6_g1_i10
g35388.t1	(pident:74.958) XP_026758022.1 phosphatase and actin regulator 4 isoform X2 [Galleria mellonella]	(pident:82.99) phosphatase and actin regulator 4B isoform X6 [Bombyx mori]	Null	(pident:57.143) Full=Phosphatase and actin regulator 1 [Gallus gallus]	Null	IPR004018(RPEL repeat)	PF02755(RPEL repeat)	Null	6ZEF_C Chain C, Phosphatase and actin regulator [Homo sapiens] /6ZEF_D Chain D, Phosphatase and actin regulator [Homo sapiens] /6ZEG_C Structure of PP1-IRSp53 chimera [PP1(7-304) + linker (G/S)x9 + IRSp53(449-465)] bound to Phactr1 (516-580) [Homo sapiens] /6ZEG_D Structure of PP1-IRSp53 chimera [PP1(7-304) + linker (G/S)x9 + IRSp53(449-465)] bound to Phactr1 (516-580) [Homo sapiens] /6ZEH_C Stru…	Null	Null	Bmor002657.1 Phosphatase and actin regulator 2 OS=Rattus norvegicus OX=10116 GN=Phactr2 PE=1 SV=1	Null	TRINITY_GG_981_c6_g1_i10
g35388.t2	(pident:79.861) XP_037869203.1 phosphatase and actin regulator 4B isoform X6 [Bombyx mori]	(pident:83.16) phosphatase and actin regulator 4B isoform X6 [Bombyx mori]	Null	(pident:57.143) Full=Phosphatase and actin regulator 1 [Gallus gallus]	Null	IPR004018(RPEL repeat)	PF02755(RPEL repeat)	Null	6ZEF_C Chain C, Phosphatase and actin regulator [Homo sapiens] /6ZEF_D Chain D, Phosphatase and actin regulator [Homo sapiens] /6ZEG_C Structure of PP1-IRSp53 chimera [PP1(7-304) + linker (G/S)x9 + IRSp53(449-465)] bound to Phactr1 (516-580) [Homo sapiens] /6ZEG_D Structure of PP1-IRSp53 chimera [PP1(7-304) + linker (G/S)x9 + IRSp53(449-465)] bound to Phactr1 (516-580) [Homo sapiens] /6ZEH_C Stru…	Null	Null	Bmor002657.1 Phosphatase and actin regulator 2 OS=Rattus norvegicus OX=10116 GN=Phactr2 PE=1 SV=1	Null	TRINITY_GG_981_c6_g1_i10
g35388.t3	(pident:77.064) CAH0720756.1 unnamed protein product, partial [Brenthis ino]	(pident:80.41) hypothetical protein O3G_MSEX006131 [Manduca sexta]	Null	(pident:56.682) Full=Phosphatase and actin regulator 1 [Gallus gallus]	Null	IPR004018(RPEL repeat)	PF02755(RPEL repeat)	Null	6ZEF_C Chain C, Phosphatase and actin regulator [Homo sapiens] /6ZEF_D Chain D, Phosphatase and actin regulator [Homo sapiens] /6ZEG_C Structure of PP1-IRSp53 chimera [PP1(7-304) + linker (G/S)x9 + IRSp53(449-465)] bound to Phactr1 (516-580) [Homo sapiens] /6ZEG_D Structure of PP1-IRSp53 chimera [PP1(7-304) + linker (G/S)x9 + IRSp53(449-465)] bound to Phactr1 (516-580) [Homo sapiens] /6ZEH_C Stru…	Null	Null	Atrn009463.1 Phosphatase and actin regulator 2 OS=Rattus norvegicus OX=10116 GN=Phactr2 PE=1 SV=1	Null	TRINITY_GG_981_c6_g1_i10
g35388.t4	(pident:76.795) XP_026758022.1 phosphatase and actin regulator 4 isoform X2 [Galleria mellonella]	(pident:81.19) phosphatase and actin regulator 4B isoform X4 [Manduca sexta]	Null	(pident:57.143) Full=Phosphatase and actin regulator 1 [Gallus gallus]	Null	IPR004018(RPEL repeat)	PF02755(RPEL repeat)	Null	6ZEF_C Chain C, Phosphatase and actin regulator [Homo sapiens] /6ZEF_D Chain D, Phosphatase and actin regulator [Homo sapiens] /6ZEG_C Structure of PP1-IRSp53 chimera [PP1(7-304) + linker (G/S)x9 + IRSp53(449-465)] bound to Phactr1 (516-580) [Homo sapiens] /6ZEG_D Structure of PP1-IRSp53 chimera [PP1(7-304) + linker (G/S)x9 + IRSp53(449-465)] bound to Phactr1 (516-580) [Homo sapiens] /6ZEH_C Stru…	Null	Null	Mjur016195.1 Phosphatase and actin regulator 2 OS=Rattus norvegicus OX=10116 GN=Phactr2 PE=1 SV=1	Null	TRINITY_GG_981_c6_g1_i10
g35384.t1	(pident:71.220) XP_037974118.1 carbohydrate-responsive element-binding protein isoform X2 [Plutella xylostella]	(pident:71.22) carbohydrate-responsive element-binding protein isoform X2 [Plutella xylostella]	Null	(pident:43.675) Full=MLX-interacting protein; AltName: Full=Transcriptional activator MondoA [Mus musculus]	GO:0046983(protein dimerization activity)	IPR036638(Helix-loop-helix DNA-binding domain superfamily),IPR011598(Myc-type, basic helix-loop-helix (bHLH) domain)	PF00010(Helix-loop-helix DNA-binding domain)	Null	5F74_B Crystal structure of ChREBP:14-3-3 complex bound with AMP [Rattus norvegicus]	Null	Null	Pxyl005165.1 MLX-interacting protein OS=Mus musculus OX=10090 GN=Mlxip PE=1 SV=1	Null	TRINITY_GG_981_c5_g1_i2
g35381.t1	(pident:74.894) XP_038215205.1 cGMP-dependent protein kinase, isozyme 1-like [Zerene cesonia]	(pident:74.89) cGMP-dependent protein kinase, isozyme 1-like [Zerene cesonia]	(pident:35.04) protein kinase, partial [Glycocaulis profundi]	(pident:50.992) Full=cGMP-dependent protein kinase, isozyme 1; Short=cGK [Drosophila melanogaster]	GO:0004672(protein kinase activity), GO:0004674(protein serine/threonine kinase activity), GO:0004692(cGMP-dependent protein kinase activity), GO:0005524(ATP binding), GO:0006468(protein phosphorylation)	IPR035014(cGMP-dependent protein kinase, catalytic domain),IPR018490(Cyclic nucleotide-binding-like),IPR018488(Cyclic nucleotide-binding, conserved site),IPR014710(RmlC-like jelly roll fold),IPR011009(Protein kinase-like domain superfamily),IPR008271(Serine/threonine-protein kinase, active site),IPR002374(cGMP-dependent kinase),IPR000961(AGC-kinase, C-terminal),IPR000719(Protein kinase domain),IP…	PF00027(Cyclic nucleotide-binding domain), PF00069(Protein kinase domain)	Null	6BDL_A Crystal structure of cGMP-dependent protein kinase Ialpha (PKG Ialpha) catalytic domain in apo state [Homo sapiens] /6BDL_B Crystal structure of cGMP-dependent protein kinase Ialpha (PKG Ialpha) catalytic domain in apo state [Homo sapiens] /6BG2_A Crystal structure of cGMP-dependent protein kinase Ialpha (PKG Ialpha) catalytic domain in AMP-PNP bound state [Homo sapiens] /6BG2_B Crystal st…	Null	Null	Psen009181.1 cGMP-dependent protein kinase, isozyme 1 OS=Drosophila melanogaster OX=7227 GN=Pkg21D PE=1 SV=2	Null	TRINITY_GG_981_c25_g1_i10
g35385.t1	(pident:50.739) XP_011548459.2 uncharacterized protein LOC105380574 [Plutella xylostella]	(pident:50.74) uncharacterized protein LOC105380574 [Plutella xylostella]	Null	Null	Null	IPR028159(RPA-interacting protein, C-terminal domain),IPR028156(RPA-interacting protein)	PF14768(Replication protein A interacting C-terminal)	Null	Null	Null	Null	Null	Null	TRINITY_GG_981_c23_g1_i1
g35380.t1	(pident:37.903) CAB3221404.1 unnamed protein product [Arctia plantaginis]	(pident:43.44) unnamed protein product [Arctia plantaginis]	Null	Null	Null	Null	Null	Null	Null	Null	Null	Null	Null	TRINITY_GG_981_c22_g1_i3
g34929.t1	(pident:48.297) CAG9096816.1 unnamed protein product [Plutella xylostella]	(pident:49.25) methylosome protein 50-like [Papilio machaon]	Null	(pident:25.970) Full=Methylosome protein 50; Short=MEP-50; AltName: Full=Androgen receptor cofactor p44; AltName: Full=WD repeat-containing protein 77; AltName: Full=p44/Mep50 [Homo sapiens]	GO:0005515(protein binding)	IPR036322(WD40-repeat-containing domain superfamily),IPR015943(WD40/YVTN repeat-like-containing domain superfamily),IPR001680(WD40 repeat)	PF00400(WD domain, G-beta repeat)	Null	Null	Null	Null	Null	Null	TRINITY_GG_981_c21_g1_i1
g35393.t1	(pident:47.866) XP_026329586.1 methylosome protein 50-like [Hyposmocoma kahamanoa]	(pident:47.87) methylosome protein 50-like [Hyposmocoma kahamanoa]<>methylosome protein 50-like [Hyposmocoma kahamanoa]	Null	(pident:26.269) Full=Methylosome protein 50; Short=MEP-50; AltName: Full=Androgen receptor cofactor p44; AltName: Full=WD repeat-containing protein 77; AltName: Full=p44/Mep50 [Homo sapiens]	GO:0005515(protein binding)	IPR036322(WD40-repeat-containing domain superfamily),IPR015943(WD40/YVTN repeat-like-containing domain superfamily),IPR001680(WD40 repeat)	PF00400(WD domain, G-beta repeat)	Null	Null	Null	Null	Null	Null	TRINITY_GG_981_c21_g1_i1
g34927.t1	(pident:48.810) XP_022819912.1 integrin beta-8-like [Spodoptera litura]	(pident:50.32) integrin beta-8-like [Spodoptera litura]	Null	Null	Null	IPR015812(Integrin beta subunit)	Null	Null	Null	Null	Null	Msex011132.1 Integrin beta-2 OS=Homo sapiens OX=9606 GN=ITGB2 PE=1 SV=2	Null	TRINITY_GG_981_c2_g1_i7
g35395.t1	(pident:46.707) XP_022819912.1 integrin beta-8-like [Spodoptera litura]	(pident:49.32) hypothetical protein HW555_010116 [Spodoptera exigua]	Null	Null	Null	IPR015812(Integrin beta subunit)	Null	Null	Null	Null	Null	Zfil013131.1 Integrin beta-2 OS=Sus scrofa OX=9823 GN=ITGB2 PE=2 SV=1	Null	TRINITY_GG_981_c2_g1_i7
g34928.t1	(pident:75.563) XP_021189629.1 aromatic-L-amino-acid decarboxylase [Helicoverpa armigera]	(pident:75.20) tyrosine decarboxylase [Manduca sexta]<>hypothetical protein O3G_MSEX006115 [Manduca sexta]	(pident:40.74) pyridoxal-dependent decarboxylase [Draconibacterium sediminis]	(pident:54.101) Full=Tyrosine decarboxylase [Caenorhabditis elegans]	GO:0003824(catalytic activity), GO:0006520(cellular amino acid metabolic process), GO:0016830(carbon-carbon lyase activity), GO:0016831(carboxy-lyase activity), GO:0019752(carboxylic acid metabolic process), GO:0030170(pyridoxal phosphate binding)	IPR021115(Pyridoxal-phosphate binding site),IPR015424(Pyridoxal phosphate-dependent transferase),IPR015422(Pyridoxal phosphate-dependent transferase, small domain),IPR015421(Pyridoxal phosphate-dependent transferase, major domain),IPR010977(Aromatic-L-amino-acid decarboxylase),IPR002129(Pyridoxal phosphate-dependent decarboxylase)	PF00282(Pyridoxal-dependent decarboxylase conserved domain)	Null	Null	Null	Null	Msex011347.1 Tyrosine decarboxylase OS=Caenorhabditis elegans OX=6239 GN=tdc-1 PE=2 SV=1	Null	TRINITY_GG_981_c16_g1_i2
g35394.t1	(pident:75.563) XP_021189629.1 aromatic-L-amino-acid decarboxylase [Helicoverpa armigera]	(pident:75.20) tyrosine decarboxylase [Manduca sexta]<>hypothetical protein O3G_MSEX006115 [Manduca sexta]	(pident:40.74) pyridoxal-dependent decarboxylase [Draconibacterium sediminis]	(pident:54.101) Full=Tyrosine decarboxylase [Caenorhabditis elegans]	GO:0003824(catalytic activity), GO:0006520(cellular amino acid metabolic process), GO:0016830(carbon-carbon lyase activity), GO:0016831(carboxy-lyase activity), GO:0019752(carboxylic acid metabolic process), GO:0030170(pyridoxal phosphate binding)	IPR021115(Pyridoxal-phosphate binding site),IPR015424(Pyridoxal phosphate-dependent transferase),IPR015422(Pyridoxal phosphate-dependent transferase, small domain),IPR015421(Pyridoxal phosphate-dependent transferase, major domain),IPR010977(Aromatic-L-amino-acid decarboxylase),IPR002129(Pyridoxal phosphate-dependent decarboxylase)	PF00282(Pyridoxal-dependent decarboxylase conserved domain)	Null	Null	Null	Null	Msex011347.1 Tyrosine decarboxylase OS=Caenorhabditis elegans OX=6239 GN=tdc-1 PE=2 SV=1	Null	TRINITY_GG_981_c16_g1_i2
g34930.t1	(pident:82.388) RVE50119.1 hypothetical protein evm_005325 [Chilo suppressalis]	(pident:83.58) PREDICTED: probable cytosolic iron-sulfur protein assembly protein Ciao1 isoform X1 [Amyelois transitella]<>PREDICTED: probable cytosolic iron-sulfur protein assembly protein Ciao1 isoform X1 [Amyelois transitella]	Null	(pident:64.478) Full=Probable cytosolic iron-sulfur protein assembly protein Ciao1 [Drosophila erecta]	GO:0005515(protein binding), GO:0016226(iron-sulfur cluster assembly), GO:0097361(CIA complex)	IPR036322(WD40-repeat-containing domain superfamily),IPR028608(Probable cytosolic iron-sulfur protein assembly protein, CIAO1/Cia1),IPR020472(G-protein beta WD-40 repeat),IPR015943(WD40/YVTN repeat-like-containing domain superfamily),IPR001680(WD40 repeat)	PF00400(WD domain, G-beta repeat)	Null	6TBL_E Crystal structure of MMS19(CTD)-CIAO1-CIAO2B CIA targeting complex [Drosophila melanogaster] /6TBL_F Crystal structure of MMS19(CTD)-CIAO1-CIAO2B CIA targeting complex [Drosophila melanogaster] /6TBN_B Crystal structure of CIAO1-CIAO2B CIA core complex [Drosophila melanogaster] /6TC0_A Crystal structure of MMS19-CIAO1-CIAO2B CIA targeting complex [Drosophila melanogaster] /6TC0_D Crystal s…	Null	Null	Hves003384.1 Probable cytosolic iron-sulfur protein assembly protein Ciao1 OS=Drosophila erecta OX=7220 GN=Ciao1 PE=3 SV=1	Null	TRINITY_GG_981_c14_g1_i1
g35392.t1	(pident:82.687) RVE50119.1 hypothetical protein evm_005325 [Chilo suppressalis]	(pident:84.18) PREDICTED: probable cytosolic iron-sulfur protein assembly protein Ciao1 isoform X1 [Amyelois transitella]<>PREDICTED: probable cytosolic iron-sulfur protein assembly protein Ciao1 isoform X1 [Amyelois transitella]	Null	(pident:64.179) Full=Probable cytosolic iron-sulfur protein assembly protein Ciao1 [Drosophila erecta]	GO:0005515(protein binding), GO:0016226(iron-sulfur cluster assembly), GO:0097361(CIA complex)	IPR036322(WD40-repeat-containing domain superfamily),IPR028608(Probable cytosolic iron-sulfur protein assembly protein, CIAO1/Cia1),IPR020472(G-protein beta WD-40 repeat),IPR015943(WD40/YVTN repeat-like-containing domain superfamily),IPR001680(WD40 repeat)	PF00400(WD domain, G-beta repeat)	Null	6TBL_E Crystal structure of MMS19(CTD)-CIAO1-CIAO2B CIA targeting complex [Drosophila melanogaster] /6TBL_F Crystal structure of MMS19(CTD)-CIAO1-CIAO2B CIA targeting complex [Drosophila melanogaster] /6TBN_B Crystal structure of CIAO1-CIAO2B CIA core complex [Drosophila melanogaster] /6TC0_A Crystal structure of MMS19-CIAO1-CIAO2B CIA targeting complex [Drosophila melanogaster] /6TC0_D Crystal s…	Null	Null	Hves003384.1 Probable cytosolic iron-sulfur protein assembly protein Ciao1 OS=Drosophila erecta OX=7220 GN=Ciao1 PE=3 SV=1	Null	TRINITY_GG_981_c14_g1_i1
g35378.t1	(pident:60.702) XP_028037640.1 RNA binding protein fox-1 homolog 1-like isoform X6 [Bombyx mandarina]	(pident:60.90) RNA binding protein fox-1 homolog 3 isoform X9 [Galleria mellonella]	Null	(pident:61.039) Full=RNA binding protein fox-1 homolog 1; AltName: Full=Ataxin-2-binding protein 1; AltName: Full=Fox-1 homolog A; AltName: Full=Hexaribonucleotide-binding protein 1 [Homo sapiens]	GO:0003676(nucleic acid binding), GO:0003723(RNA binding)	IPR035979(RNA-binding domain superfamily),IPR034237(FOX1, RNA recognition motif),IPR012677(Nucleotide-binding alpha-beta plait domain superfamily),IPR000504(RNA recognition motif domain)	PF00076(RNA recognition motif. (a.k.a. RRM, RBD, or RNP domain))	Null	4ZKA_A High Resolution Crystal Structure of Fox1 RRM [Homo sapiens] /4ZKA_B High Resolution Crystal Structure of Fox1 RRM [Homo sapiens] /4ZKA_C High Resolution Crystal Structure of Fox1 RRM [Homo sapiens] /4ZKA_D High Resolution Crystal Structure of Fox1 RRM [Homo sapiens] /4ZKA_E High Resolution Crystal Structure of Fox1 RRM [Homo sapiens] /4ZKA_F High Resolution Crystal Structure of Fox1 RRM […	Null	Null	Pmad001942.1 RNA binding protein fox-1 homolog 1 OS=Danio rerio OX=7955 GN=rbfox1 PE=2 SV=1	Null	TRINITY_GG_981_c13_g1_i6
g35379.t1	(pident:86.719) XP_045785298.1 RNA binding protein fox-1 homolog 3 isoform X3 [Maniola jurtina]	(pident:79.03) PREDICTED: RNA binding protein fox-1 homolog 3 isoform X3 [Amyelois transitella]	Null	Null	Null	Null	Null	Null	Null	Null	Null	Ccro001815.1 RNA binding protein fox-1 homolog 1-like OS=Danio rerio OX=7955 GN=rbfox1l PE=1 SV=1	Null	TRINITY_GG_981_c13_g1_i6
g34935.t1	(pident:62.091) CAH0720755.1 unnamed protein product, partial [Brenthis ino]	(pident:61.71) unnamed protein product, partial [Brenthis ino]	Null	(pident:26.359) Full=Atrial natriuretic peptide-converting enzyme; AltName: Full=Corin; AltName: Full=Pro-ANP-converting enzyme; Contains: Full=Atrial natriuretic peptide-converting enzyme, N-terminal propeptide; Contains: Full=Atrial natriuretic peptide-converting enzyme, activated protease fragment; Contains: Full=Atrial natriuretic peptide-converting enzyme, 180 kDa soluble fragment [Rattus no…	GO:0004252(serine-type endopeptidase activity), GO:0005515(protein binding), GO:0006508(proteolysis)	IPR043504(Peptidase S1, PA clan, chymotrypsin-like fold),IPR036790(Frizzled cysteine-rich domain superfamily),IPR036364(SEA domain superfamily),IPR036055(LDL receptor-like superfamily),IPR023415(Low-density lipoprotein (LDL) receptor class A, conserved site),IPR020067(Frizzled domain),IPR009003(Peptidase S1, PA clan),IPR002172(Low-density lipoprotein (LDL) receptor class A repeat),IPR001254(Serin…	PF00057(Low-density lipoprotein receptor domain class A), PF00089(Trypsin), PF01392(Fz domain)	Null	Null	Null	Null	Darc011620.1 Transmembrane protease serine 2 OS=Mus musculus OX=10090 GN=Tmprss2 PE=2 SV=3	Null	TRINITY_GG_981_c11_g1_i10
g35389.t1	(pident:62.217) CAH0720755.1 unnamed protein product, partial [Brenthis ino]	(pident:63.95) atrial natriuretic peptide-converting enzyme [Hyposmocoma kahamanoa]	Null	(pident:26.524) Full=Atrial natriuretic peptide-converting enzyme; AltName: Full=Corin; AltName: Full=Pro-ANP-converting enzyme; Contains: Full=Atrial natriuretic peptide-converting enzyme, N-terminal propeptide; Contains: Full=Atrial natriuretic peptide-converting enzyme, activated protease fragment; Contains: Full=Atrial natriuretic peptide-converting enzyme, 180 kDa soluble fragment [Rattus no…	GO:0004252(serine-type endopeptidase activity), GO:0005515(protein binding), GO:0006508(proteolysis)	IPR043504(Peptidase S1, PA clan, chymotrypsin-like fold),IPR036790(Frizzled cysteine-rich domain superfamily),IPR036364(SEA domain superfamily),IPR036055(LDL receptor-like superfamily),IPR023415(Low-density lipoprotein (LDL) receptor class A, conserved site),IPR020067(Frizzled domain),IPR009003(Peptidase S1, PA clan),IPR002172(Low-density lipoprotein (LDL) receptor class A repeat),IPR001254(Serin…	PF00057(Low-density lipoprotein receptor domain class A), PF00089(Trypsin), PF01392(Fz domain)	Null	Null	Null	Null	Darc011620.1 Transmembrane protease serine 2 OS=Mus musculus OX=10090 GN=Tmprss2 PE=2 SV=3	Null	TRINITY_GG_981_c11_g1_i10
g34931.t1	(pident:74.349) PCG73678.1 hypothetical protein B5V51_14544 [Heliothis virescens]	(pident:74.35) hypothetical protein B5V51_14544 [Heliothis virescens]	(pident:41.00) Nif3-like dinuclear metal center hexameric protein [Tichowtungia aerotolerans]	(pident:51.880) Full=NIF3-like protein 1; AltName: Full=Protein anon-35F/36A [Drosophila melanogaster]	Null	IPR036069(GTP cyclohydrolase 1 type 2/Nif3 superfamily),IPR002678(GTP cyclohydrolase 1 type 2/Nif3)	PF01784(NIF3 (NGG1p interacting factor 3))	Null	Null	Null	Null	Hfas000367.1 NIF3-like protein 1 OS=Drosophila melanogaster OX=7227 GN=anon-35F/36A PE=1 SV=3	Null	TRINITY_GG_981_c10_g1_i10
g35391.t1	(pident:74.349) PCG73678.1 hypothetical protein B5V51_14544 [Heliothis virescens]	(pident:74.35) hypothetical protein B5V51_14544 [Heliothis virescens]	(pident:40.61) Nif3-like dinuclear metal center hexameric protein [Tichowtungia aerotolerans]	(pident:52.256) Full=NIF3-like protein 1; AltName: Full=Protein anon-35F/36A [Drosophila melanogaster]	Null	IPR036069(GTP cyclohydrolase 1 type 2/Nif3 superfamily),IPR002678(GTP cyclohydrolase 1 type 2/Nif3)	PF01784(NIF3 (NGG1p interacting factor 3))	Null	Null	Null	Null	Hfas000367.1 NIF3-like protein 1 OS=Drosophila melanogaster OX=7227 GN=anon-35F/36A PE=1 SV=3	Null	TRINITY_GG_981_c10_g1_i10
g34932.t1	(pident:38.489) XP_011548473.2 uncharacterized protein LOC105380582 isoform X2 [Plutella xylostella]	(pident:38.14) hypothetical protein JYU34_007410 [Plutella xylostella]	Null	Null	Null	Null	Null	Null	Null	Null	Null	Null	Null	TRINITY_GG_981_c1_g2_i2
g35390.t1	(pident:40.035) XP_011548473.2 uncharacterized protein LOC105380582 isoform X2 [Plutella xylostella]	(pident:44.87) hypothetical protein JYU34_007410 [Plutella xylostella]	Null	Null	Null	Null	Null	Null	Null	Null	Null	Null	Null	TRINITY_GG_981_c1_g2_i2
g35386.t1	(pident:91.611) XP_026495247.1 ribosomal protein S6 kinase beta-2 [Vanessa tameamea]	(pident:89.87) ribosomal protein S6 kinase beta-1 [Ostrinia furnacalis]	(pident:55.26) protein kinase, partial [Pedobacter sp. ASV17]	(pident:64.637) Full=Ribosomal protein S6 kinase beta-1; Short=S6K-beta-1; Short=S6K1; AltName: Full=70 kDa ribosomal protein S6 kinase 1; Short=P70S6K1; Short=p70-S6K 1; AltName: Full=Ribosomal protein S6 kinase I; AltName: Full=p70 ribosomal S6 kinase alpha; Short=p70 S6 kinase alpha; Short=p70 S6K-alpha; Short=p70 S6KA [Rattus norvegicus]	GO:0004672(protein kinase activity), GO:0004674(protein serine/threonine kinase activity), GO:0005524(ATP binding), GO:0006468(protein phosphorylation), GO:0007165(signal transduction)	IPR017892(Protein kinase, C-terminal),IPR017441(Protein kinase, ATP binding site),IPR016238(Ribosomal protein S6 kinase),IPR011009(Protein kinase-like domain superfamily),IPR008271(Serine/threonine-protein kinase, active site),IPR000961(AGC-kinase, C-terminal),IPR000719(Protein kinase domain)	PF00069(Protein kinase domain), PF00433(Protein kinase C terminal domain)	Null	4L43_A Crystal structures of human p70S6K1-T389A (form I) [Homo sapiens] /4L44_A Crystal structures of human p70S6K1-T389A (form II) [Homo sapiens]	Null	Null	Lcam011962.1 Ribosomal protein S6 kinase beta-1 OS=Homo sapiens OX=9606 GN=RPS6KB1 PE=1 SV=2	Null	TRINITY_GG_981_c1_g1_i10
g25814.t1	(pident:90.642) XP_014371028.1 alcohol dehydrogenase class-3 [Papilio machaon]	(pident:90.43) unnamed protein product [Leptidea sinapis]	(pident:70.03) S-(hydroxymethyl)glutathione dehydrogenase/class III alcohol dehydrogenase [Aestuariibacter sp. GS-14]	(pident:77.128) Full=Alcohol dehydrogenase class-3; AltName: Full=Alcohol dehydrogenase class-III; AltName: Full=Glutathione-dependent formaldehyde dehydrogenase; Short=FALDH; Short=FDH; Short=GSH-FDH; AltName: Full=S-(hydroxymethyl)glutathione dehydrogenase [Sparus aurata]	GO:0006069(ethanol oxidation), GO:0008270(zinc ion binding), GO:0016491(oxidoreductase activity), GO:0051903(S-(hydroxymethyl)glutathione dehydrogenase activity)	IPR036291(NAD(P)-binding domain superfamily),IPR014183(Alcohol dehydrogenase class III),IPR013154(Alcohol dehydrogenase, N-terminal),IPR013149(Alcohol dehydrogenase-like, C-terminal),IPR011032(GroES-like superfamily),IPR002328(Alcohol dehydrogenase, zinc-type, conserved site)	PF00107(Zinc-binding dehydrogenase), PF08240(Alcohol dehydrogenase GroES-like domain)	protein_Group:_400,_ProteinID:_410,_lgP:_235.21,_Coverage:_40,_#Peptides:_15,_#Unique:_15,_PTM:_Y,_Avg.Mass:_40359	3QJ5_A S-nitrosoglutathione reductase (GSNOR) in complex with N6022 [Homo sapiens] /3QJ5_B S-nitrosoglutathione reductase (GSNOR) in complex with N6022 [Homo sapiens]	Q4WIQ3#PHI:3277#GnoA#746128#Aspergillus_fumigatus#unaffected_pathogenicity	Null	Badu029165.1 Alcohol dehydrogenase class-3 OS=Sparus aurata OX=8175 PE=2 SV=1	Null	TRINITY_GG_980_c9_g1_i1
g4935.t1	(pident:90.642) XP_014371028.1 alcohol dehydrogenase class-3 [Papilio machaon]	(pident:90.43) unnamed protein product [Leptidea sinapis]	(pident:70.03) S-(hydroxymethyl)glutathione dehydrogenase/class III alcohol dehydrogenase [Aestuariibacter sp. GS-14]	(pident:77.128) Full=Alcohol dehydrogenase class-3; AltName: Full=Alcohol dehydrogenase class-III; AltName: Full=Glutathione-dependent formaldehyde dehydrogenase; Short=FALDH; Short=FDH; Short=GSH-FDH; AltName: Full=S-(hydroxymethyl)glutathione dehydrogenase [Sparus aurata]	GO:0006069(ethanol oxidation), GO:0008270(zinc ion binding), GO:0016491(oxidoreductase activity), GO:0051903(S-(hydroxymethyl)glutathione dehydrogenase activity)	IPR036291(NAD(P)-binding domain superfamily),IPR014183(Alcohol dehydrogenase class III),IPR013154(Alcohol dehydrogenase, N-terminal),IPR013149(Alcohol dehydrogenase-like, C-terminal),IPR011032(GroES-like superfamily),IPR002328(Alcohol dehydrogenase, zinc-type, conserved site)	PF00107(Zinc-binding dehydrogenase), PF08240(Alcohol dehydrogenase GroES-like domain)	protein_Group:_400,_ProteinID:_411,_lgP:_235.21,_Coverage:_40,_#Peptides:_15,_#Unique:_15,_PTM:_Y,_Avg.Mass:_40359	3QJ5_A S-nitrosoglutathione reductase (GSNOR) in complex with N6022 [Homo sapiens] /3QJ5_B S-nitrosoglutathione reductase (GSNOR) in complex with N6022 [Homo sapiens]	Q4WIQ3#PHI:3277#GnoA#746128#Aspergillus_fumigatus#unaffected_pathogenicity	Null	Badu029165.1 Alcohol dehydrogenase class-3 OS=Sparus aurata OX=8175 PE=2 SV=1	Null	TRINITY_GG_980_c9_g1_i1
g22480.t1	(pident:53.254) XP_026748540.1 uncharacterized protein LOC113509400 isoform X1 [Galleria mellonella]	(pident:52.86) uncharacterized protein LOC113509400 isoform X1 [Galleria mellonella]	Null	Null	Null	Null	Null	Null	Null	Null	Null	Atrn008154.1 Putative uncharacterized protein	Null	TRINITY_GG_980_c7_g1_i4
g22480.t2	(pident:53.947) XP_026748549.1 uncharacterized protein LOC113509400 isoform X2 [Galleria mellonella]	(pident:53.54) uncharacterized protein LOC113509400 isoform X2 [Galleria mellonella]	Null	Null	Null	Null	Null	Null	Null	Null	Null	Atrn008154.1 Putative uncharacterized protein	Null	TRINITY_GG_980_c7_g1_i4
g25800.t1	(pident:53.353) XP_026748540.1 uncharacterized protein LOC113509400 isoform X1 [Galleria mellonella]	(pident:52.71) uncharacterized protein LOC113509400 isoform X1 [Galleria mellonella]	Null	Null	Null	Null	Null	Null	Null	Null	Null	Atrn008154.1 Putative uncharacterized protein	Null	TRINITY_GG_980_c7_g1_i4
g25800.t2	(pident:54.049) XP_026748549.1 uncharacterized protein LOC113509400 isoform X2 [Galleria mellonella]	(pident:53.39) uncharacterized protein LOC113509400 isoform X2 [Galleria mellonella]	Null	Null	Null	Null	Null	Null	Null	Null	Null	Atrn008154.1 Putative uncharacterized protein	Null	TRINITY_GG_980_c7_g1_i4
g25816.t1	(pident:62.896) XP_039755877.1 RNA-binding region-containing protein 3-like [Pararge aegeria]	(pident:64.83) hypothetical protein JYU34_021003 [Plutella xylostella]	Null	(pident:32.573) Full=RNA-binding region-containing protein 3; AltName: Full=RNA-binding motif protein 40; Short=RNA-binding protein 40; AltName: Full=U11/U12 small nuclear ribonucleoprotein 65 kDa protein; Short=U11/U12 snRNP 65 kDa protein; Short=U11/U12-65K [Homo sapiens]	GO:0003676(nucleic acid binding), GO:0003723(RNA binding)	IPR045164(RNA-binding region-containing protein RBM41/RNPC3),IPR035979(RNA-binding domain superfamily),IPR012677(Nucleotide-binding alpha-beta plait domain superfamily),IPR000504(RNA recognition motif domain)	PF00076(RNA recognition motif. (a.k.a. RRM, RBD, or RNP domain))	Null	5OBN_A NMR solution structure of U11/U12 65K protein's C-terminal RRM domain (381-516) [Homo sapiens]	Null	Null	Aasp001629.1 RNA-binding region-containing protein 3 OS=Rattus norvegicus OX=10116 GN=Rnpc3 PE=1 SV=2	Null	TRINITY_GG_980_c5_g1_i1
g4937.t1	(pident:62.896) XP_039755877.1 RNA-binding region-containing protein 3-like [Pararge aegeria]	(pident:64.83) hypothetical protein JYU34_021003 [Plutella xylostella]	Null	(pident:32.573) Full=RNA-binding region-containing protein 3; AltName: Full=RNA-binding motif protein 40; Short=RNA-binding protein 40; AltName: Full=U11/U12 small nuclear ribonucleoprotein 65 kDa protein; Short=U11/U12 snRNP 65 kDa protein; Short=U11/U12-65K [Homo sapiens]	GO:0003676(nucleic acid binding), GO:0003723(RNA binding)	IPR045164(RNA-binding region-containing protein RBM41/RNPC3),IPR035979(RNA-binding domain superfamily),IPR012677(Nucleotide-binding alpha-beta plait domain superfamily),IPR000504(RNA recognition motif domain)	PF00076(RNA recognition motif. (a.k.a. RRM, RBD, or RNP domain))	Null	5OBN_A NMR solution structure of U11/U12 65K protein's C-terminal RRM domain (381-516) [Homo sapiens]	Null	Null	Aasp001629.1 RNA-binding region-containing protein 3 OS=Rattus norvegicus OX=10116 GN=Rnpc3 PE=1 SV=2	Null	TRINITY_GG_980_c5_g1_i1
g25813.t1	(pident:65.827) CAG9088668.1 unnamed protein product [Plutella xylostella]	(pident:66.30) regulator of MON1-CCZ1 complex [Plutella xylostella]<>unnamed protein product [Plutella xylostella]	Null	(pident:38.462) Full=Regulator of MON1-CCZ1 complex; AltName: Full=Colon cancer-associated protein Mic1; Short=Mic-1; AltName: Full=WD repeat-containing protein 98 [Homo sapiens]	GO:0005515(protein binding), GO:0010506(regulation of autophagy), GO:0035658(Mon1-Ccz1 complex)	IPR040371(Regulator of MON1-CCZ1 complex),IPR036322(WD40-repeat-containing domain superfamily),IPR009755(Regulator of MON1-CCZ1 complex, C-terminal)	PF07035(Colon cancer-associated protein Mic1-like)	Null	Null	Null	Null	Etag006340.1 Regulator of MON1-CCZ1 complex OS=Homo sapiens OX=9606 GN=RMC1 PE=1 SV=2	Null	TRINITY_GG_980_c4_g1_i2
g4933.t1	(pident:73.252) CAG9088668.1 unnamed protein product [Plutella xylostella]	(pident:74.16) regulator of MON1-CCZ1 complex [Plutella xylostella]<>unnamed protein product [Plutella xylostella]	Null	(pident:44.586) Full=Regulator of MON1-CCZ1 complex; AltName: Full=Colon cancer-associated protein Mic1; Short=Mic-1; AltName: Full=WD repeat-containing protein 98 [Homo sapiens]	GO:0005515(protein binding), GO:0010506(regulation of autophagy), GO:0035658(Mon1-Ccz1 complex)	IPR040371(Regulator of MON1-CCZ1 complex),IPR036322(WD40-repeat-containing domain superfamily)	Null	Null	Null	Null	Null	Bany002926.1 Regulator of MON1-CCZ1 complex OS=Homo sapiens OX=9606 GN=RMC1 PE=1 SV=2	Null	TRINITY_GG_980_c4_g1_i2
g4934.t1	(pident:57.190) XP_045450714.1 regulator of MON1-CCZ1 complex [Melitaea cinxia]	(pident:60.47) regulator of MON1-CCZ1 complex, partial [Ostrinia furnacalis]	Null	(pident:33.439) Full=Regulator of MON1-CCZ1 complex; AltName: Full=Colon cancer-associated protein Mic1; Short=Mic-1 [Mus musculus]	GO:0010506(regulation of autophagy), GO:0035658(Mon1-Ccz1 complex)	IPR040371(Regulator of MON1-CCZ1 complex),IPR009755(Regulator of MON1-CCZ1 complex, C-terminal)	PF07035(Colon cancer-associated protein Mic1-like)	Null	Null	Null	Null	Etag006340.1 Regulator of MON1-CCZ1 complex OS=Homo sapiens OX=9606 GN=RMC1 PE=1 SV=2	Null	TRINITY_GG_980_c4_g1_i2
g25812.t1	(pident:48.707) CAG9088673.1 unnamed protein product [Plutella xylostella]	(pident:48.11) coiled-coil and C2 domain-containing protein 2A [Plutella xylostella]<>unnamed protein product [Plutella xylostella]	Null	(pident:23.204) Full=Coiled-coil and C2 domain-containing protein 2A [Homo sapiens]	Null	IPR035892(C2 domain superfamily),IPR000008(C2 domain)	PF00168(C2 domain)	Null	Null	Null	Null	Null	Null	TRINITY_GG_980_c35_g1_i4
g4932.t1	(pident:48.707) CAG9088673.1 unnamed protein product [Plutella xylostella]	(pident:48.11) coiled-coil and C2 domain-containing protein 2A [Plutella xylostella]<>unnamed protein product [Plutella xylostella]	Null	(pident:23.211) Full=Coiled-coil and C2 domain-containing protein 2A [Homo sapiens]	Null	IPR035892(C2 domain superfamily),IPR000008(C2 domain)	PF00168(C2 domain)	Null	Null	Null	Null	Null	Null	TRINITY_GG_980_c35_g1_i4
g25803.t1	(pident:74.847) PCG71646.1 hypothetical protein B5V51_1643 [Heliothis virescens]	(pident:74.85) hypothetical protein B5V51_1643 [Heliothis virescens]	(pident:42.06) uridine kinase [Paenibacillus flagellatus]	(pident:49.638) Full=Uridine-cytidine kinase-like 1 [Homo sapiens]	GO:0005524(ATP binding), GO:0016301(kinase activity)	IPR027417(P-loop containing nucleoside triphosphate hydrolase),IPR006083(Phosphoribulokinase/uridine kinase),IPR000764(Uridine kinase-like)	PF00485(Phosphoribulokinase / Uridine kinase family)	Null	Null	Null	Null	Dpun009999.1 Uridine-cytidine kinase-like 1 OS=Homo sapiens OX=9606 GN=UCKL1 PE=1 SV=2	Null	TRINITY_GG_980_c31_g1_i2
g25803.t2	(pident:74.551) XP_028038949.1 uridine-cytidine kinase-like 1 isoform X1 [Bombyx mandarina]	(pident:75.15) Uridine-cytidine kinase-like 1 [Plutella xylostella]	(pident:42.06) uridine kinase [Paenibacillus flagellatus]	(pident:49.638) Full=Uridine-cytidine kinase-like 1 [Homo sapiens]	GO:0005524(ATP binding), GO:0016301(kinase activity)	IPR027417(P-loop containing nucleoside triphosphate hydrolase),IPR006083(Phosphoribulokinase/uridine kinase),IPR000764(Uridine kinase-like)	PF00485(Phosphoribulokinase / Uridine kinase family)	Null	Null	Null	Null	Tbat013585.1 Uridine-cytidine kinase-like 1 OS=Mus musculus OX=10090 GN=Uckl1 PE=1 SV=1	Null	TRINITY_GG_980_c31_g1_i2
g4923.t1	(pident:85.996) XP_035445290.1 uridine-cytidine kinase-like 1 isoform X1 [Spodoptera frugiperda]	(pident:86.54) Uridine-cytidine kinase-like 1 [Plutella xylostella]	(pident:46.48) uracil phosphoribosyltransferase [Burkholderia gladioli]	(pident:63.253) Full=Uridine-cytidine kinase-like 1 [Homo sapiens]	GO:0005524(ATP binding), GO:0016301(kinase activity)	IPR029057(Phosphoribosyltransferase-like),IPR027417(P-loop containing nucleoside triphosphate hydrolase),IPR006083(Phosphoribulokinase/uridine kinase),IPR000836(Phosphoribosyltransferase domain),IPR000764(Uridine kinase-like)	PF00485(Phosphoribulokinase / Uridine kinase family), PF14681(Uracil phosphoribosyltransferase)	Null	6PWZ_A Crystal structure of human uridine-cytidine kinase 2 complexed with 2'-azidocytidine [Homo sapiens] /6PWZ_B Crystal structure of human uridine-cytidine kinase 2 complexed with 2'-azidocytidine [Homo sapiens] /6PWZ_C Crystal structure of human uridine-cytidine kinase 2 complexed with 2'-azidocytidine [Homo sapiens] /6PWZ_D Crystal structure of human uridine-cytidine kinase 2 complexed with …	Null	Null	Ndro013360.1 Uridine-cytidine kinase-like 1 OS=Homo sapiens OX=9606 GN=UCKL1 PE=1 SV=2	Null	TRINITY_GG_980_c31_g1_i2
g4923.t2	(pident:86.339) PCG71646.1 hypothetical protein B5V51_1643 [Heliothis virescens]	(pident:86.34) hypothetical protein B5V51_1643 [Heliothis virescens]	(pident:46.48) uracil phosphoribosyltransferase [Burkholderia gladioli]	(pident:63.253) Full=Uridine-cytidine kinase-like 1 [Homo sapiens]	GO:0005524(ATP binding), GO:0016301(kinase activity)	IPR029057(Phosphoribosyltransferase-like),IPR027417(P-loop containing nucleoside triphosphate hydrolase),IPR006083(Phosphoribulokinase/uridine kinase),IPR000836(Phosphoribosyltransferase domain),IPR000764(Uridine kinase-like),IPR000477(Reverse transcriptase domain)	PF00485(Phosphoribulokinase / Uridine kinase family), PF14681(Uracil phosphoribosyltransferase)	Null	6PWZ_A Crystal structure of human uridine-cytidine kinase 2 complexed with 2'-azidocytidine [Homo sapiens] /6PWZ_B Crystal structure of human uridine-cytidine kinase 2 complexed with 2'-azidocytidine [Homo sapiens] /6PWZ_C Crystal structure of human uridine-cytidine kinase 2 complexed with 2'-azidocytidine [Homo sapiens] /6PWZ_D Crystal structure of human uridine-cytidine kinase 2 complexed with …	Null	Null	Slit008917.1 Uridine-cytidine kinase-like 1 OS=Homo sapiens OX=9606 GN=UCKL1 PE=1 SV=2	Null	TRINITY_GG_980_c31_g1_i2
g9247.t1	(pident:86.339) PCG71646.1 hypothetical protein B5V51_1643 [Heliothis virescens]	(pident:86.34) hypothetical protein B5V51_1643 [Heliothis virescens]	(pident:46.48) uracil phosphoribosyltransferase [Burkholderia gladioli]	(pident:63.253) Full=Uridine-cytidine kinase-like 1 [Homo sapiens]	GO:0005524(ATP binding), GO:0016301(kinase activity)	IPR029057(Phosphoribosyltransferase-like),IPR027417(P-loop containing nucleoside triphosphate hydrolase),IPR006083(Phosphoribulokinase/uridine kinase),IPR000836(Phosphoribosyltransferase domain),IPR000764(Uridine kinase-like)	PF00485(Phosphoribulokinase / Uridine kinase family), PF14681(Uracil phosphoribosyltransferase)	Null	6PWZ_A Crystal structure of human uridine-cytidine kinase 2 complexed with 2'-azidocytidine [Homo sapiens] /6PWZ_B Crystal structure of human uridine-cytidine kinase 2 complexed with 2'-azidocytidine [Homo sapiens] /6PWZ_C Crystal structure of human uridine-cytidine kinase 2 complexed with 2'-azidocytidine [Homo sapiens] /6PWZ_D Crystal structure of human uridine-cytidine kinase 2 complexed with …	Null	Null	Slit008917.1 Uridine-cytidine kinase-like 1 OS=Homo sapiens OX=9606 GN=UCKL1 PE=1 SV=2	Null	TRINITY_GG_980_c31_g1_i2
g9247.t2	(pident:85.996) XP_035445290.1 uridine-cytidine kinase-like 1 isoform X1 [Spodoptera frugiperda]	(pident:86.54) Uridine-cytidine kinase-like 1 [Plutella xylostella]	(pident:46.48) uracil phosphoribosyltransferase [Burkholderia gladioli]	(pident:63.253) Full=Uridine-cytidine kinase-like 1 [Homo sapiens]	GO:0005524(ATP binding), GO:0016301(kinase activity)	IPR029057(Phosphoribosyltransferase-like),IPR027417(P-loop containing nucleoside triphosphate hydrolase),IPR006083(Phosphoribulokinase/uridine kinase),IPR000836(Phosphoribosyltransferase domain),IPR000764(Uridine kinase-like)	PF00485(Phosphoribulokinase / Uridine kinase family), PF14681(Uracil phosphoribosyltransferase)	Null	6PWZ_A Crystal structure of human uridine-cytidine kinase 2 complexed with 2'-azidocytidine [Homo sapiens] /6PWZ_B Crystal structure of human uridine-cytidine kinase 2 complexed with 2'-azidocytidine [Homo sapiens] /6PWZ_C Crystal structure of human uridine-cytidine kinase 2 complexed with 2'-azidocytidine [Homo sapiens] /6PWZ_D Crystal structure of human uridine-cytidine kinase 2 complexed with …	Null	Null	Ndro013360.1 Uridine-cytidine kinase-like 1 OS=Homo sapiens OX=9606 GN=UCKL1 PE=1 SV=2	Null	TRINITY_GG_980_c31_g1_i2
g25818.t1	(pident:93.846) XP_035444906.1 NHP2-like protein 1 [Spodoptera frugiperda]	(pident:93.85) NHP2-like protein 1 [Spodoptera litura]<>NHP2-like protein 1 [Spodoptera frugiperda]<>hypothetical protein HW555_008214 [Spodoptera exigua]<>hypothetical protein SFRURICE_003238 [Spodoptera frugiperda]<>hypothetical protein SFRUCORN_006469 [Spodoptera frugiperda]	(pident:66.00) ribosomal L7Ae/L30e/S12e/Gadd45 family protein, partial [Acinetobacter baumannii]	(pident:84.921) Full=NHP2-like protein 1; AltName: Full=High mobility group-like nuclear protein 2 homolog 1; AltName: Full=U4/U6.U5 small nuclear ribonucleoprotein SNU13; AltName: Full=U4/U6.U5 tri-snRNP 15.5 kDa protein [Xenopus laevis]	GO:0003723(RNA binding), GO:0005730(nucleolus), GO:0042254(ribosome biogenesis), GO:1990904(ribonucleoprotein complex)	IPR029064(50S ribosomal protein L30e-like),IPR018492(Ribosomal protein L7Ae/L8/Nhp2 family),IPR004038(Ribosomal protein L7Ae/L30e/S12e/Gadd45),IPR004037(Ribosomal protein L7Ae conserved site),IPR002415(H/ACA ribonucleoprotein complex, subunit Nhp2, eukaryote)	PF01248(Ribosomal protein L7Ae/L30e/S12e/Gadd45 family)	protein_Group:_959,_ProteinID:_2201,_lgP:_108.33,_Coverage:_23,_#Peptides:_3,_#Unique:_3,_PTM:_Y,_Avg.Mass:_14185	1E7K_A Crystal structure of the spliceosomal 15.5kD protein bound to a U4 snRNA fragment [Homo sapiens] /1E7K_B Crystal structure of the spliceosomal 15.5kD protein bound to a U4 snRNA fragment [Homo sapiens] /3JCR_I 3D structure determination of the human*U4/U6.U5* tri-snRNP complex [Homo sapiens] /5O9Z_O Cryo-EM structure of a pre-catalytic human spliceosome primed for activation (B complex) [H…	Null	Null	Ccur028510.1 NHP2-like protein 1 OS=Bos taurus OX=9913 GN=SNU13 PE=2 SV=3	Null	TRINITY_GG_980_c3_g1_i13
g4939.t1	(pident:93.846) XP_035444906.1 NHP2-like protein 1 [Spodoptera frugiperda]	(pident:93.85) NHP2-like protein 1 [Spodoptera litura]<>NHP2-like protein 1 [Spodoptera frugiperda]<>hypothetical protein HW555_008214 [Spodoptera exigua]<>hypothetical protein SFRURICE_003238 [Spodoptera frugiperda]<>hypothetical protein SFRUCORN_006469 [Spodoptera frugiperda]	(pident:66.00) ribosomal L7Ae/L30e/S12e/Gadd45 family protein, partial [Acinetobacter baumannii]	(pident:84.921) Full=NHP2-like protein 1; AltName: Full=High mobility group-like nuclear protein 2 homolog 1; AltName: Full=U4/U6.U5 small nuclear ribonucleoprotein SNU13; AltName: Full=U4/U6.U5 tri-snRNP 15.5 kDa protein [Xenopus laevis]	GO:0003723(RNA binding), GO:0005730(nucleolus), GO:0042254(ribosome biogenesis), GO:1990904(ribonucleoprotein complex)	IPR029064(50S ribosomal protein L30e-like),IPR018492(Ribosomal protein L7Ae/L8/Nhp2 family),IPR004038(Ribosomal protein L7Ae/L30e/S12e/Gadd45),IPR004037(Ribosomal protein L7Ae conserved site),IPR002415(H/ACA ribonucleoprotein complex, subunit Nhp2, eukaryote)	PF01248(Ribosomal protein L7Ae/L30e/S12e/Gadd45 family)	protein_Group:_959,_ProteinID:_2200,_lgP:_108.33,_Coverage:_23,_#Peptides:_3,_#Unique:_3,_PTM:_Y,_Avg.Mass:_14185	1E7K_A Crystal structure of the spliceosomal 15.5kD protein bound to a U4 snRNA fragment [Homo sapiens] /1E7K_B Crystal structure of the spliceosomal 15.5kD protein bound to a U4 snRNA fragment [Homo sapiens] /3JCR_I 3D structure determination of the human*U4/U6.U5* tri-snRNP complex [Homo sapiens] /5O9Z_O Cryo-EM structure of a pre-catalytic human spliceosome primed for activation (B complex) [H…	Null	Null	Ccur028510.1 NHP2-like protein 1 OS=Bos taurus OX=9913 GN=SNU13 PE=2 SV=3	Null	TRINITY_GG_980_c3_g1_i13
g25804.t1	(pident:87.085) CAG4946399.1 unnamed protein product [Parnassius apollo]	(pident:84.42) unnamed protein product [Danaus chrysippus]	Null	(pident:52.667) Full=Netrin-B; Flags: Precursor [Drosophila melanogaster]	GO:0005515(protein binding)	IPR018933(Netrin module, non-TIMP type),IPR008993(Tissue inhibitor of metalloproteinases-like, OB-fold),IPR002049(Laminin-type EGF domain),IPR001134(Netrin domain)	PF00053(Laminin EGF domain), PF01759(UNC-6/NTR/C345C module)	Null	4OVE_A X-ray Crystal Structure of Mouse Netrin-1 [Mus musculus]	Null	Null	Mcix022020.1 Netrin-1 OS=Homo sapiens OX=9606 GN=NTN1 PE=1 SV=2	Null	TRINITY_GG_980_c21_g1_i1
g25806.t1	(pident:78.882) CAF4927065.1 unnamed protein product [Pieris macdunnoughi]	(pident:77.68) unnamed protein product [Pieris macdunnoughi]	Null	(pident:53.258) Full=Netrin-A; Flags: Precursor [Drosophila melanogaster]	Null	IPR008211(Laminin, N-terminal),IPR002049(Laminin-type EGF domain)	PF00053(Laminin EGF domain), PF00055(Laminin N-terminal (Domain VI))	Null	4PLM_A Crystal Structure of Chicken Netrin-1 (LN-LE3) [Gallus gallus] /4PLN_A Crystal Structure of Chicken Netrin-1 (LN-LE3) complexed with mouse Neogenin (FN4-5) [Gallus gallus] /4PLN_B Crystal Structure of Chicken Netrin-1 (LN-LE3) complexed with mouse Neogenin (FN4-5) [Gallus gallus] /4PLO_A Crystal Structure of chicken Netrin-1 (LN-LE3) in complex with mouse DCC (FN4-5) [Gallus gallus]	Null	Null	Ccro023830.1 Netrin-1 OS=Gallus gallus OX=9031 GN=NTN1 PE=1 SV=1	Null	TRINITY_GG_980_c21_g1_i1
g4924.t1	(pident:87.085) CAG4946399.1 unnamed protein product [Parnassius apollo]	(pident:87.08) unnamed protein product [Parnassius apollo]	Null	(pident:52.667) Full=Netrin-B; Flags: Precursor [Drosophila melanogaster]	GO:0005515(protein binding)	IPR018933(Netrin module, non-TIMP type),IPR008993(Tissue inhibitor of metalloproteinases-like, OB-fold),IPR002049(Laminin-type EGF domain),IPR001134(Netrin domain)	PF00053(Laminin EGF domain), PF01759(UNC-6/NTR/C345C module)	Null	4OVE_A X-ray Crystal Structure of Mouse Netrin-1 [Mus musculus]	Null	Null	Mcix022020.1 Netrin-1 OS=Homo sapiens OX=9606 GN=NTN1 PE=1 SV=2	Null	TRINITY_GG_980_c21_g1_i1
g4924.t2	(pident:89.571) XP_038223567.1 netrin-1-like isoform X2 [Zerene cesonia]	(pident:89.57) netrin-1-like isoform X2 [Zerene cesonia]	Null	(pident:79.070) Full=Netrin-1; Flags: Precursor [Rattus norvegicus]	Null	IPR002049(Laminin-type EGF domain)	PF00053(Laminin EGF domain)	Null	4OVE_A X-ray Crystal Structure of Mouse Netrin-1 [Mus musculus]	Null	Null	Zces012027.1 Netrin-1 OS=Homo sapiens OX=9606 GN=NTN1 PE=1 SV=2	Null	TRINITY_GG_980_c21_g1_i1
g4928.t1	(pident:79.193) CAF4927065.1 unnamed protein product [Pieris macdunnoughi]	(pident:77.98) unnamed protein product [Pieris macdunnoughi]	Null	(pident:53.541) Full=Netrin-A; Flags: Precursor [Drosophila melanogaster]	Null	IPR008211(Laminin, N-terminal),IPR002049(Laminin-type EGF domain)	PF00053(Laminin EGF domain), PF00055(Laminin N-terminal (Domain VI))	Null	4PLM_A Crystal Structure of Chicken Netrin-1 (LN-LE3) [Gallus gallus] /4PLN_A Crystal Structure of Chicken Netrin-1 (LN-LE3) complexed with mouse Neogenin (FN4-5) [Gallus gallus] /4PLN_B Crystal Structure of Chicken Netrin-1 (LN-LE3) complexed with mouse Neogenin (FN4-5) [Gallus gallus] /4PLO_A Crystal Structure of chicken Netrin-1 (LN-LE3) in complex with mouse DCC (FN4-5) [Gallus gallus]	Null	Null	Ccro023830.1 Netrin-1 OS=Gallus gallus OX=9031 GN=NTN1 PE=1 SV=1	Null	TRINITY_GG_980_c21_g1_i1
g25817.t1	(pident:69.248) XP_011551989.2 chitobiosyldiphosphodolichol beta-mannosyltransferase [Plutella xylostella]	(pident:69.48) hypothetical protein JYU34_020809 [Plutella xylostella]	Null	(pident:48.837) Full=Chitobiosyldiphosphodolichol beta-mannosyltransferase; AltName: Full=Asparagine-linked glycosylation protein 1 homolog; AltName: Full=Beta-1,4-mannosyltransferase; AltName: Full=GDP-Man:GlcNAc2-PP-dolichol mannosyltransferase; AltName: Full=GDP-mannose-dolichol diphosphochitobiose mannosyltransferase [Pongo abelii]	GO:0000030(mannosyltransferase activity), GO:0016757(transferase activity, transferring glycosyl groups)	IPR026051(Chitobiosyldiphosphodolichol beta-mannosyltransferase ALG1-like),IPR001296(Glycosyl transferase, family 1)	PF00534(Glycosyl transferases group 1)	Null	Null	Null	CAH0730084.1 unnamed protein product, partial [Brenthis ino]	Pxyl006577.1 Chitobiosyldiphosphodolichol beta-mannosyltransferase OS=Mus musculus OX=10090 GN=Alg1 PE=1 SV=3	Null	TRINITY_GG_980_c2_g2_i1
g4938.t1	(pident:69.932) XP_011551989.2 chitobiosyldiphosphodolichol beta-mannosyltransferase [Plutella xylostella]	(pident:70.16) hypothetical protein JYU34_020809 [Plutella xylostella]	Null	(pident:46.667) Full=Chitobiosyldiphosphodolichol beta-mannosyltransferase; AltName: Full=Asparagine-linked glycosylation protein 1 homolog; AltName: Full=Beta-1,4-mannosyltransferase; AltName: Full=GDP-Man:GlcNAc2-PP-dolichol mannosyltransferase; AltName: Full=GDP-mannose-dolichol diphosphochitobiose mannosyltransferase [Mus musculus]	GO:0000030(mannosyltransferase activity), GO:0016757(transferase activity, transferring glycosyl groups)	IPR026051(Chitobiosyldiphosphodolichol beta-mannosyltransferase ALG1-like),IPR001296(Glycosyl transferase, family 1)	PF00534(Glycosyl transferases group 1)	Null	Null	Null	CAH0730084.1 unnamed protein product, partial [Brenthis ino]	Pxyl006577.1 Chitobiosyldiphosphodolichol beta-mannosyltransferase OS=Mus musculus OX=10090 GN=Alg1 PE=1 SV=3	Null	TRINITY_GG_980_c2_g2_i1
g25805.t1	Null	Null	Null	Null	Null	Null	Null	Null	Null	Null	Null	Null	Null	TRINITY_GG_980_c2_g1_i2
g4925.t1	Null	Null	Null	Null	Null	Null	Null	Null	Null	Null	Null	Null	Null	TRINITY_GG_980_c2_g1_i2
g22481.t1	(pident:85.612) XP_045453715.1 60S ribosomal protein L28 [Melitaea cinxia]	(pident:90.65) PREDICTED: 60S ribosomal protein L28 [Amyelois transitella]	(pident:89.21) 60S ribosomal protein L28, partial [Listeria monocytogenes]	(pident:88.489) Full=60S ribosomal protein L28 [Spodoptera frugiperda]	GO:0003735(structural constituent of ribosome), GO:0005840(ribosome), GO:0006412(translation)	IPR029004(Ribosomal L28e/Mak16),IPR002672(Ribosomal protein L28e)	PF01778(Ribosomal L28e protein family)	protein_Group:_223,_ProteinID:_635,_lgP:_184.88,_Coverage:_53,_#Peptides:_15,_#Unique:_14,_PTM:_Y,_Avg.Mass:_15848	4V6W_Cr Chain Cr, 60S ribosomal protein L28 [Drosophila melanogaster]	Null	Null	Atrn008157.1 60S ribosomal protein L28 OS=Spodoptera frugiperda OX=7108 GN=RpL28 PE=2 SV=1	Null	TRINITY_GG_980_c1_g2_i1
g25801.t1	(pident:85.612) XP_045453715.1 60S ribosomal protein L28 [Melitaea cinxia]	(pident:90.65) PREDICTED: 60S ribosomal protein L28 [Amyelois transitella]	(pident:89.21) 60S ribosomal protein L28, partial [Listeria monocytogenes]	(pident:88.489) Full=60S ribosomal protein L28 [Spodoptera frugiperda]	GO:0003735(structural constituent of ribosome), GO:0005840(ribosome), GO:0006412(translation)	IPR029004(Ribosomal L28e/Mak16),IPR002672(Ribosomal protein L28e)	PF01778(Ribosomal L28e protein family)	protein_Group:_223,_ProteinID:_634,_lgP:_184.88,_Coverage:_53,_#Peptides:_15,_#Unique:_14,_PTM:_Y,_Avg.Mass:_15848	4V6W_Cr Chain Cr, 60S ribosomal protein L28 [Drosophila melanogaster]	Null	Null	Atrn008157.1 60S ribosomal protein L28 OS=Spodoptera frugiperda OX=7108 GN=RpL28 PE=2 SV=1	Null	TRINITY_GG_980_c1_g2_i1
g25810.t1	(pident:46.915) XP_022829829.1 disks large-associated protein 5 isoform X1 [Spodoptera litura]	(pident:46.29) disks large-associated protein 5 isoform X1 [Plutella xylostella]<>unnamed protein product [Plutella xylostella]	Null	(pident:33.846) Full=Disks large-associated protein 5; Short=DAP-5; AltName: Full=Discs large homolog 7; AltName: Full=Disks large-associated protein DLG7; AltName: Full=Hepatoma up-regulated protein; Short=HURP [Homo sapiens]	GO:0023052(signaling)	IPR005026(SAPAP family)	PF03359(Guanylate-kinase-associated protein (GKAP) protein)	Null	Null	Null	Null	Null	Null	TRINITY_GG_980_c0_g1_i10
g4930.t1	(pident:46.009) XP_022829833.1 disks large-associated protein 5 isoform X4 [Spodoptera litura]	(pident:44.64) disks large-associated protein 5 isoform X4 [Spodoptera litura]	Null	(pident:33.846) Full=Disks large-associated protein 5; Short=DAP-5; AltName: Full=Discs large homolog 7; AltName: Full=Disks large-associated protein DLG7; AltName: Full=Hepatoma up-regulated protein; Short=HURP [Homo sapiens]	GO:0023052(signaling)	IPR028002(Myb/SANT-like DNA-binding domain 5),IPR005026(SAPAP family)	PF03359(Guanylate-kinase-associated protein (GKAP) protein), PF13873(Myb/SANT-like DNA-binding domain)	Null	Null	Null	Null	Null	Null	TRINITY_GG_980_c0_g1_i10
g36840.t1	(pident:59.125) CAB3239586.1 unnamed protein product [Arctia plantaginis]	(pident:61.90) fatty-acid amide hydrolase 2-A [Manduca sexta]<>fatty-acid amide hydrolase 2-A [Manduca sexta]<>fatty-acid amide hydrolase 2-A [Manduca sexta]<>fatty-acid amide hydrolase 2-A [Manduca sexta]<>hypothetical protein O3G_MSEX006421 [Manduca sexta]	(pident:37.81) amidase [Perlucidibaca piscinae]	(pident:36.278) Full=Fatty-acid amide hydrolase 2; AltName: Full=Amidase domain-containing protein; AltName: Full=Anandamide amidohydrolase 2; AltName: Full=Oleamide hydrolase 2 [Homo sapiens]	Null	IPR036928(Amidase signature (AS) superfamily),IPR023631(Amidase signature domain)	PF01425(Amidase)	Null	Null	Null	Null	Msex005442.1 Fatty-acid amide hydrolase 2-A OS=Danio rerio OX=7955 GN=faah2a PE=2 SV=1	Null	TRINITY_GG_978_c4_g1_i15
g7356.t1	(pident:59.316) CAB3239586.1 unnamed protein product [Arctia plantaginis]	(pident:62.29) fatty-acid amide hydrolase 2-A [Manduca sexta]<>fatty-acid amide hydrolase 2-A [Manduca sexta]<>fatty-acid amide hydrolase 2-A [Manduca sexta]<>fatty-acid amide hydrolase 2-A [Manduca sexta]<>hypothetical protein O3G_MSEX006421 [Manduca sexta]	(pident:37.81) amidase [Perlucidibaca piscinae]	(pident:36.654) Full=Fatty-acid amide hydrolase 2; AltName: Full=Amidase domain-containing protein; AltName: Full=Anandamide amidohydrolase 2; AltName: Full=Oleamide hydrolase 2 [Homo sapiens]	Null	IPR036928(Amidase signature (AS) superfamily),IPR023631(Amidase signature domain)	PF01425(Amidase)	Null	Null	Null	Null	Msex005442.1 Fatty-acid amide hydrolase 2-A OS=Danio rerio OX=7955 GN=faah2a PE=2 SV=1	Null	TRINITY_GG_978_c4_g1_i15
g12140.t1	(pident:58.527) XP_037975853.1 uncharacterized protein LOC119694154 [Plutella xylostella]	(pident:31.83) uncharacterized protein LOC119691181 [Plutella xylostella]	(pident:52.10) hypothetical protein, partial [Pseudomonas aeruginosa]	Null	Null	IPR008042(Retrotransposon, Pao),IPR005312(Protein of unknown function DUF1759)	PF03564(Protein of unknown function (DUF1759)), PF05380(Pao retrotransposon peptidase)	Null	Null	Null	Null	Null	Null	TRINITY_GG_978_c32_g1_i1
g12704.t1	(pident:44.845) XP_035442740.1 uncharacterized protein LOC118270979 [Spodoptera frugiperda]	(pident:31.66) uncharacterized protein LOC118270979 [Spodoptera frugiperda]	(pident:28.35) DDE-type integrase/transposase/recombinase, partial [Streptococcus dysgalactiae]	Null	GO:0003676(nucleic acid binding), GO:0015074(DNA integration)	IPR040676(Domain of unknown function DUF5641),IPR036397(Ribonuclease H superfamily),IPR012337(Ribonuclease H-like superfamily),IPR008042(Retrotransposon, Pao),IPR005312(Protein of unknown function DUF1759),IPR001584(Integrase, catalytic core)	PF03564(Protein of unknown function (DUF1759)), PF05380(Pao retrotransposon peptidase), PF18701(Family of unknown function (DUF5641))	Null	Null	Null	Null	Null	Null	TRINITY_GG_978_c32_g1_i1
g12767.t1	(pident:45.863) XP_037963862.1 uncharacterized protein LOC119691185 [Plutella xylostella]	(pident:44.42) uncharacterized protein LOC114360251 [Ostrinia furnacalis]	(pident:33.42) DUF1759 domain-containing protein, partial [Wolbachia pipientis]	Null	Null	IPR005312(Protein of unknown function DUF1759)	PF03564(Protein of unknown function (DUF1759))	Null	Null	Null	Null	Null	Null	TRINITY_GG_978_c32_g1_i1
g19867.t1	(pident:44.283) XP_022827952.1 uncharacterized protein LOC111357464 isoform X3 [Spodoptera litura]	(pident:31.32) uncharacterized protein LOC118270979 [Spodoptera frugiperda]	(pident:42.91) DDE-type integrase/transposase/recombinase, partial [Pseudomonas aeruginosa]	Null	GO:0003676(nucleic acid binding), GO:0015074(DNA integration)	IPR040676(Domain of unknown function DUF5641),IPR036397(Ribonuclease H superfamily),IPR012337(Ribonuclease H-like superfamily),IPR008042(Retrotransposon, Pao),IPR005312(Protein of unknown function DUF1759),IPR001584(Integrase, catalytic core)	PF03564(Protein of unknown function (DUF1759)), PF05380(Pao retrotransposon peptidase), PF18701(Family of unknown function (DUF5641))	Null	Null	Null	Null	Null	Null	TRINITY_GG_978_c32_g1_i1
g21719.t1	(pident:50.157) XP_035442740.1 uncharacterized protein LOC118270979 [Spodoptera frugiperda]	(pident:31.68) PREDICTED: uncharacterized protein LOC106129409 [Amyelois transitella]<>PREDICTED: uncharacterized protein LOC106131843 [Amyelois transitella]	(pident:28.51) DDE-type integrase/transposase/recombinase [Wolbachia endosymbiont of Drosophila ananassae]	Null	GO:0003676(nucleic acid binding), GO:0015074(DNA integration)	IPR041588(Integrase zinc-binding domain),IPR040676(Domain of unknown function DUF5641),IPR036397(Ribonuclease H superfamily),IPR012337(Ribonuclease H-like superfamily),IPR008042(Retrotransposon, Pao),IPR005312(Protein of unknown function DUF1759),IPR001584(Integrase, catalytic core)	PF03564(Protein of unknown function (DUF1759)), PF05380(Pao retrotransposon peptidase), PF17921(Integrase zinc binding domain), PF18701(Family of unknown function (DUF5641))	Null	Null	Null	Null	Null	Null	TRINITY_GG_978_c32_g1_i1
g23702.t1	(pident:47.836) XP_028170671.1 uncharacterized protein LOC114360251 [Ostrinia furnacalis]	(pident:48.29) uncharacterized protein LOC114360251 [Ostrinia furnacalis]	(pident:35.71) DUF1759 domain-containing protein, partial [Wolbachia pipientis]	Null	Null	IPR005312(Protein of unknown function DUF1759)	PF03564(Protein of unknown function (DUF1759))	Null	Null	Null	Null	Atrn003385.1 Putative uncharacterized protein	Null	TRINITY_GG_978_c32_g1_i1
g31601.t1	(pident:53.107) XP_037975853.1 uncharacterized protein LOC119694154 [Plutella xylostella]	(pident:58.42) uncharacterized protein LOC119694154 [Plutella xylostella]	(pident:52.57) hypothetical protein, partial [Pseudomonas aeruginosa]	Null	Null	IPR043502(DNA/RNA polymerase superfamily),IPR008042(Retrotransposon, Pao)	PF05380(Pao retrotransposon peptidase)	Null	Null	Null	Null	Cmed011547.1 Putative uncharacterized protein	Null	TRINITY_GG_978_c32_g1_i1
g34274.t1	(pident:50.157) XP_035442740.1 uncharacterized protein LOC118270979 [Spodoptera frugiperda]	(pident:31.74) PREDICTED: uncharacterized protein LOC106129409 [Amyelois transitella]<>PREDICTED: uncharacterized protein LOC106131843 [Amyelois transitella]	(pident:28.51) DDE-type integrase/transposase/recombinase [Wolbachia endosymbiont of Drosophila ananassae]	Null	GO:0003676(nucleic acid binding), GO:0015074(DNA integration)	IPR041588(Integrase zinc-binding domain),IPR040676(Domain of unknown function DUF5641),IPR036397(Ribonuclease H superfamily),IPR012337(Ribonuclease H-like superfamily),IPR008042(Retrotransposon, Pao),IPR005312(Protein of unknown function DUF1759),IPR001584(Integrase, catalytic core)	PF03564(Protein of unknown function (DUF1759)), PF05380(Pao retrotransposon peptidase), PF17921(Integrase zinc binding domain), PF18701(Family of unknown function (DUF5641))	Null	Null	Null	Null	Null	Null	TRINITY_GG_978_c32_g1_i1
g34275.t1	(pident:50.157) XP_035442740.1 uncharacterized protein LOC118270979 [Spodoptera frugiperda]	(pident:31.74) PREDICTED: uncharacterized protein LOC106129409 [Amyelois transitella]<>PREDICTED: uncharacterized protein LOC106131843 [Amyelois transitella]	(pident:28.51) DDE-type integrase/transposase/recombinase [Wolbachia endosymbiont of Drosophila ananassae]	Null	GO:0003676(nucleic acid binding), GO:0015074(DNA integration)	IPR041588(Integrase zinc-binding domain),IPR040676(Domain of unknown function DUF5641),IPR036397(Ribonuclease H superfamily),IPR012337(Ribonuclease H-like superfamily),IPR008042(Retrotransposon, Pao),IPR005312(Protein of unknown function DUF1759),IPR001584(Integrase, catalytic core)	PF03564(Protein of unknown function (DUF1759)), PF05380(Pao retrotransposon peptidase), PF17921(Integrase zinc binding domain), PF18701(Family of unknown function (DUF5641))	Null	Null	Null	Null	Null	Null	TRINITY_GG_978_c32_g1_i1
g34276.t1	(pident:44.587) XP_022827952.1 uncharacterized protein LOC111357464 isoform X3 [Spodoptera litura]	(pident:31.32) uncharacterized protein LOC118270979 [Spodoptera frugiperda]	(pident:43.23) DDE-type integrase/transposase/recombinase, partial [Pseudomonas aeruginosa]	Null	GO:0003676(nucleic acid binding), GO:0015074(DNA integration)	IPR040676(Domain of unknown function DUF5641),IPR036397(Ribonuclease H superfamily),IPR012337(Ribonuclease H-like superfamily),IPR008042(Retrotransposon, Pao),IPR005312(Protein of unknown function DUF1759),IPR001584(Integrase, catalytic core)	PF03564(Protein of unknown function (DUF1759)), PF05380(Pao retrotransposon peptidase), PF18701(Family of unknown function (DUF5641))	Null	Null	Null	Null	Null	Null	TRINITY_GG_978_c32_g1_i1
g36253.t1	(pident:52.467) XP_035442740.1 uncharacterized protein LOC118270979 [Spodoptera frugiperda]	(pident:34.71) uncharacterized protein LOC118270979 [Spodoptera frugiperda]	(pident:44.38) DDE-type integrase/transposase/recombinase [Pseudomonas aeruginosa]	Null	GO:0003676(nucleic acid binding), GO:0015074(DNA integration)	IPR040676(Domain of unknown function DUF5641),IPR036397(Ribonuclease H superfamily),IPR012337(Ribonuclease H-like superfamily),IPR008042(Retrotransposon, Pao),IPR005312(Protein of unknown function DUF1759),IPR001584(Integrase, catalytic core)	PF03564(Protein of unknown function (DUF1759)), PF05380(Pao retrotransposon peptidase), PF18701(Family of unknown function (DUF5641))	Null	Null	Null	Null	Null	Null	TRINITY_GG_978_c32_g1_i1
g7359.t1	(pident:50.470) XP_035442740.1 uncharacterized protein LOC118270979 [Spodoptera frugiperda]	(pident:31.80) PREDICTED: uncharacterized protein LOC106129409 [Amyelois transitella]<>PREDICTED: uncharacterized protein LOC106131843 [Amyelois transitella]	(pident:28.51) DDE-type integrase/transposase/recombinase [Wolbachia endosymbiont of Drosophila ananassae]	Null	GO:0003676(nucleic acid binding), GO:0015074(DNA integration)	IPR041588(Integrase zinc-binding domain),IPR040676(Domain of unknown function DUF5641),IPR036397(Ribonuclease H superfamily),IPR012337(Ribonuclease H-like superfamily),IPR008042(Retrotransposon, Pao),IPR005312(Protein of unknown function DUF1759),IPR001584(Integrase, catalytic core)	PF03564(Protein of unknown function (DUF1759)), PF05380(Pao retrotransposon peptidase), PF17921(Integrase zinc binding domain), PF18701(Family of unknown function (DUF5641))	Null	Null	Null	Null	Null	Null	TRINITY_GG_978_c32_g1_i1
g7351.t1	(pident:84.235) CAG9135368.1 unnamed protein product [Plutella xylostella]	(pident:85.41) hypothetical protein HW555_009555 [Spodoptera exigua]	Null	(pident:50.201) Full=Zinc finger protein Elbow [Drosophila melanogaster]	Null	IPR013087(Zinc finger C2H2-type)	Null	Null	Null	Null	Null	Cohr008645.1 Zinc finger protein Elbow OS=Drosophila melanogaster OX=7227 GN=elB PE=1 SV=4	Null	TRINITY_GG_978_c3_g1_i6
g36843.t1	(pident:38.431) XP_034829552.1 meiosis-specific nuclear structural protein 1-like [Maniola hyperantus]	(pident:36.29) trichohyalin-like [Maniola jurtina]<>trichohyalin-like [Maniola jurtina]	Null	Null	Null	IPR043597(Trichohyalin-plectin-homology domain),IPR026504(Meiosis-specific nuclear structural protein 1)	PF13868(Trichohyalin-plectin-homology domain)	Null	Null	Null	Null	Null	Null	TRINITY_GG_978_c10_g1_i4
g7354.t1	(pident:38.431) XP_034829552.1 meiosis-specific nuclear structural protein 1-like [Maniola hyperantus]	(pident:36.29) trichohyalin-like [Maniola jurtina]<>trichohyalin-like [Maniola jurtina]	Null	Null	Null	IPR043597(Trichohyalin-plectin-homology domain),IPR026504(Meiosis-specific nuclear structural protein 1)	PF13868(Trichohyalin-plectin-homology domain)	Null	Null	Null	Null	Null	Null	TRINITY_GG_978_c10_g1_i4
g34853.t1	(pident:78.788) XP_035439062.1 2-oxoisovalerate dehydrogenase subunit beta, mitochondrial-like [Spodoptera frugiperda]	(pident:79.59) 2-oxoisovalerate dehydrogenase subunit beta, mitochondrial-like [Spodoptera frugiperda]	(pident:61.75) alpha-ketoacid dehydrogenase subunit beta [Pseudoalteromonas byunsanensis]	(pident:69.742) Full=2-oxoisovalerate dehydrogenase subunit beta, mitochondrial; AltName: Full=Branched-chain alpha-keto acid dehydrogenase E1 component beta chain; Short=BCKDE1B; Short=BCKDH E1-beta; Flags: Precursor [Rattus norvegicus]	GO:0003824(catalytic activity)	IPR033248(Transketolase, C-terminal domain),IPR029061(Thiamin diphosphate-binding fold),IPR009014(Transketolase C-terminal/Pyruvate-ferredoxin oxidoreductase domain II),IPR005475(Transketolase-like, pyrimidine-binding domain)	PF02779(Transketolase, pyrimidine binding domain), PF02780(Transketolase, C-terminal domain)	protein_Group:_1649,_ProteinID:_2155,_lgP:_100.79,_Coverage:_10,_#Peptides:_2,_#Unique:_2,_PTM:_Y,_Avg.Mass:_35842	1DTW_B Chain B, BRANCHED-CHAIN ALPHA-KETO ACID DEHYDROGENASE BETA SUBUNIT [Homo sapiens] /1OLS_B Chain B, 2-OXOISOVALERATE DEHYDROGENASE BETA SUBUNIT [Homo sapiens] /1OLU_B Chain B, 2-OXOISOVALERATE DEHYDROGENASE BETA SUBUNIT [Homo sapiens] /1U5B_B Chain B, 2-oxoisovalerate dehydrogenase beta subunit [Homo sapiens] /1V11_B Chain B, 2-OXOISOVALERATE DEHYDROGENASE BETA SUBUNIT [Homo sapiens] /1V16_…	Null	Null	Hpyr022217.1 2-oxoisovalerate dehydrogenase subunit beta, mitochondrial OS=Homo sapiens OX=9606 GN=BCKDHB PE=1 SV=2	Null	TRINITY_GG_978_c1_g2_i1
g36838.t1	(pident:80.163) XP_035439062.1 2-oxoisovalerate dehydrogenase subunit beta, mitochondrial-like [Spodoptera frugiperda]	(pident:80.16) 2-oxoisovalerate dehydrogenase subunit beta, mitochondrial-like [Spodoptera frugiperda]	(pident:61.30) alpha-ketoacid dehydrogenase subunit beta [Halomonas lutescens]	(pident:69.275) Full=2-oxoisovalerate dehydrogenase subunit beta, mitochondrial; AltName: Full=Branched-chain alpha-keto acid dehydrogenase E1 component beta chain; Short=BCKDE1B; Short=BCKDH E1-beta; Flags: Precursor [Rattus norvegicus]	GO:0003824(catalytic activity)	IPR033248(Transketolase, C-terminal domain),IPR029061(Thiamin diphosphate-binding fold),IPR009014(Transketolase C-terminal/Pyruvate-ferredoxin oxidoreductase domain II),IPR005475(Transketolase-like, pyrimidine-binding domain)	PF02779(Transketolase, pyrimidine binding domain), PF02780(Transketolase, C-terminal domain)	protein_Group:_1649,_ProteinID:_2157,_lgP:_100.79,_Coverage:_9,_#Peptides:_2,_#Unique:_2,_PTM:_Y,_Avg.Mass:_40084	1DTW_B Chain B, BRANCHED-CHAIN ALPHA-KETO ACID DEHYDROGENASE BETA SUBUNIT [Homo sapiens] /1OLS_B Chain B, 2-OXOISOVALERATE DEHYDROGENASE BETA SUBUNIT [Homo sapiens] /1OLU_B Chain B, 2-OXOISOVALERATE DEHYDROGENASE BETA SUBUNIT [Homo sapiens] /1U5B_B Chain B, 2-oxoisovalerate dehydrogenase beta subunit [Homo sapiens] /1V11_B Chain B, 2-OXOISOVALERATE DEHYDROGENASE BETA SUBUNIT [Homo sapiens] /1V16_…	Null	Null	Hpyr022217.1 2-oxoisovalerate dehydrogenase subunit beta, mitochondrial OS=Homo sapiens OX=9606 GN=BCKDHB PE=1 SV=2	Null	TRINITY_GG_978_c1_g2_i1
g7358.t1	(pident:80.163) XP_035439062.1 2-oxoisovalerate dehydrogenase subunit beta, mitochondrial-like [Spodoptera frugiperda]	(pident:80.16) 2-oxoisovalerate dehydrogenase subunit beta, mitochondrial-like [Spodoptera frugiperda]	(pident:61.61) alpha-ketoacid dehydrogenase subunit beta [Halomonas lutescens]	(pident:69.565) Full=2-oxoisovalerate dehydrogenase subunit beta, mitochondrial; AltName: Full=Branched-chain alpha-keto acid dehydrogenase E1 component beta chain; Short=BCKDE1B; Short=BCKDH E1-beta; Flags: Precursor [Rattus norvegicus]	GO:0003824(catalytic activity)	IPR033248(Transketolase, C-terminal domain),IPR029061(Thiamin diphosphate-binding fold),IPR009014(Transketolase C-terminal/Pyruvate-ferredoxin oxidoreductase domain II),IPR005475(Transketolase-like, pyrimidine-binding domain)	PF02779(Transketolase, pyrimidine binding domain), PF02780(Transketolase, C-terminal domain)	protein_Group:_1649,_ProteinID:_2156,_lgP:_100.79,_Coverage:_9,_#Peptides:_2,_#Unique:_2,_PTM:_Y,_Avg.Mass:_40068	1DTW_B Chain B, BRANCHED-CHAIN ALPHA-KETO ACID DEHYDROGENASE BETA SUBUNIT [Homo sapiens] /1OLS_B Chain B, 2-OXOISOVALERATE DEHYDROGENASE BETA SUBUNIT [Homo sapiens] /1OLU_B Chain B, 2-OXOISOVALERATE DEHYDROGENASE BETA SUBUNIT [Homo sapiens] /1U5B_B Chain B, 2-oxoisovalerate dehydrogenase beta subunit [Homo sapiens] /1V11_B Chain B, 2-OXOISOVALERATE DEHYDROGENASE BETA SUBUNIT [Homo sapiens] /1V16_…	Null	Null	Hpyr022217.1 2-oxoisovalerate dehydrogenase subunit beta, mitochondrial OS=Homo sapiens OX=9606 GN=BCKDHB PE=1 SV=2	Null	TRINITY_GG_978_c1_g2_i1
g36839.t1	(pident:69.638) XP_037868663.1 inner nuclear membrane protein Man1 [Bombyx mori]	(pident:73.16) inner nuclear membrane protein Man1-like [Plutella xylostella]	Null	(pident:42.537) Full=Inner nuclear membrane protein Man1; AltName: Full=LEM domain-containing protein 3 [Mus musculus]	GO:0003676(nucleic acid binding), GO:0005637(nuclear inner membrane), GO:0006997(nucleus organization), GO:1902531(regulation of intracellular signal transduction)	IPR041885(MAN1, winged-helix domain),IPR035979(RNA-binding domain superfamily),IPR034997(Inner nuclear membrane protein Man1),IPR034394(MAN1, RNA recognition motif),IPR018996(Man1/Src1, C-terminal),IPR012677(Nucleotide-binding alpha-beta plait domain superfamily),IPR011015(LEM/LEM-like domain superfamily),IPR003887(LEM domain)	PF03020(LEM domain), PF09402(Man1-Src1p-C-terminal domain)	Null	Null	Null	Null	Pxyl003993.1 Inner nuclear membrane protein Man1 OS=Mus musculus OX=10090 GN=Lemd3 PE=1 SV=2	Null	TRINITY_GG_978_c1_g1_i1
g7357.t1	(pident:69.638) XP_037868663.1 inner nuclear membrane protein Man1 [Bombyx mori]	(pident:73.03) inner nuclear membrane protein Man1-like [Plutella xylostella]	Null	(pident:42.537) Full=Inner nuclear membrane protein Man1; AltName: Full=LEM domain-containing protein 3 [Mus musculus]	GO:0003676(nucleic acid binding), GO:0005637(nuclear inner membrane), GO:0006997(nucleus organization), GO:1902531(regulation of intracellular signal transduction)	IPR041885(MAN1, winged-helix domain),IPR035979(RNA-binding domain superfamily),IPR034997(Inner nuclear membrane protein Man1),IPR034394(MAN1, RNA recognition motif),IPR018996(Man1/Src1, C-terminal),IPR012677(Nucleotide-binding alpha-beta plait domain superfamily),IPR011015(LEM/LEM-like domain superfamily),IPR003887(LEM domain)	PF03020(LEM domain), PF09402(Man1-Src1p-C-terminal domain)	Null	Null	Null	Null	Pxyl003993.1 Inner nuclear membrane protein Man1 OS=Mus musculus OX=10090 GN=Lemd3 PE=1 SV=2	Null	TRINITY_GG_978_c1_g1_i1
g36841.t1	(pident:79.787) XP_037974370.1 myc box-dependent-interacting protein 1 isoform X2 [Plutella xylostella]	(pident:78.02) myc box-dependent-interacting protein 1 isoform X1 [Plutella xylostella]<>myc box-dependent-interacting protein 1 isoform X2 [Plutella xylostella]	Null	(pident:36.697) Full=Amphiphysin [Rattus norvegicus]	GO:0005515(protein binding), GO:0005737(cytoplasm)	IPR036028(SH3-like domain superfamily),IPR027267(AH/BAR domain superfamily),IPR004148(BAR domain),IPR003005(Amphiphysin),IPR001452(SH3 domain)	PF03114(BAR domain), PF14604(Variant SH3 domain)	protein_Group:_656,_ProteinID:_797,_lgP:_153.44,_Coverage:_16,_#Peptides:_9,_#Unique:_9,_PTM:_N,_Avg.Mass:_50132	1URU_A Amphiphysin BAR domain from Drosophila [Drosophila melanogaster]	Null	Null	Atrn005801.1 Myc box-dependent-interacting protein 1 OS=Rattus norvegicus OX=10116 GN=Bin1 PE=1 SV=1	Null	TRINITY_GG_978_c0_g1_i14
g7355.t1	(pident:79.787) XP_037974370.1 myc box-dependent-interacting protein 1 isoform X2 [Plutella xylostella]	(pident:77.66) myc box-dependent-interacting protein 1 isoform X1 [Plutella xylostella]<>myc box-dependent-interacting protein 1 isoform X2 [Plutella xylostella]	Null	(pident:36.697) Full=Amphiphysin [Rattus norvegicus]	GO:0005515(protein binding), GO:0005737(cytoplasm)	IPR036028(SH3-like domain superfamily),IPR027267(AH/BAR domain superfamily),IPR004148(BAR domain),IPR003005(Amphiphysin),IPR001452(SH3 domain)	PF03114(BAR domain), PF14604(Variant SH3 domain)	protein_Group:_656,_ProteinID:_793,_lgP:_153.44,_Coverage:_16,_#Peptides:_9,_#Unique:_9,_PTM:_N,_Avg.Mass:_50132	1URU_A Amphiphysin BAR domain from Drosophila [Drosophila melanogaster]	Null	Null	Atrn005801.1 Myc box-dependent-interacting protein 1 OS=Rattus norvegicus OX=10116 GN=Bin1 PE=1 SV=1	Null	TRINITY_GG_978_c0_g1_i14
g1006.t1	(pident:45.259) XP_035433698.1 uncharacterized protein LOC118265091 [Spodoptera frugiperda]	(pident:45.73) hypothetical protein JYU34_016097 [Plutella xylostella]	(pident:37.55) reverse transcriptase family protein [Enterobacteriaceae endosymbiont of Donacia bicoloricornis]	(pident:27.984) Full=Probable RNA-directed DNA polymerase from transposon BS; AltName: Full=Reverse transcriptase [Drosophila melanogaster]	GO:0003676(nucleic acid binding)	IPR038717(Tc1-like transposase, DDE domain),IPR036397(Ribonuclease H superfamily),IPR000477(Reverse transcriptase domain)	PF00078(Reverse transcriptase (RNA-dependent DNA polymerase)), PF13358(DDE superfamily endonuclease)	Null	Null	Null	Null	Hass004004.1 RNA-directed DNA polymerase from mobile element jockey OS=Drosophila melanogaster OX=7227 GN=pol PE=1 SV=1	Null	TRINITY_GG_974_c1_g1_i1
g10540.t1	(pident:49.697) PCG80923.1 hypothetical protein B5V51_14599 [Heliothis virescens]	(pident:49.38) hypothetical protein JYU34_020934 [Plutella xylostella]	Null	Null	Null	Null	Null	Null	Null	Null	Null	Efla012258.1 Putative uncharacterized protein	Null	TRINITY_GG_974_c1_g1_i1
g1069.t1	(pident:50.898) PCG80923.1 hypothetical protein B5V51_14599 [Heliothis virescens]	(pident:50.29) hypothetical protein JYU34_020934 [Plutella xylostella]	Null	Null	Null	Null	Null	Null	Null	Null	Null	Efla012258.1 Putative uncharacterized protein	Null	TRINITY_GG_974_c1_g1_i1
g1070.t1	(pident:46.930) XP_026313905.1 uncharacterized protein LOC113225718 [Hyposmocoma kahamanoa]	(pident:63.28) uncharacterized protein LOC113225718 [Hyposmocoma kahamanoa]	(pident:49.56) reverse transcriptase family protein, partial [Pseudomonas aeruginosa]	Null	Null	IPR000477(Reverse transcriptase domain)	PF00078(Reverse transcriptase (RNA-dependent DNA polymerase))	Null	Null	Null	Null	Npol016011.1 Probable RNA-directed DNA polymerase from transposon X-element OS=Drosophila melanogaster OX=7227 GN=X-element\ORF2 PE=3 SV=1	Null	TRINITY_GG_974_c1_g1_i1
g1080.t1	(pident:48.828) CAG9137745.1 unnamed protein product [Plutella xylostella]	(pident:52.93) hypothetical protein JYU34_012473 [Plutella xylostella]	(pident:39.64) reverse transcriptase family protein [Enterobacteriaceae endosymbiont of Donacia bicoloricornis]	(pident:28.851) Full=Probable RNA-directed DNA polymerase from transposon BS; AltName: Full=Reverse transcriptase [Drosophila melanogaster]	Null	IPR043502(DNA/RNA polymerase superfamily),IPR000477(Reverse transcriptase domain)	PF00078(Reverse transcriptase (RNA-dependent DNA polymerase))	Null	Null	Null	Null	Ccro021858.1 Probable RNA-directed DNA polymerase from transposon BS OS=Drosophila melanogaster OX=7227 GN=RTase PE=2 SV=1	Null	TRINITY_GG_974_c1_g1_i1
g11551.t1	(pident:46.127) CAG9137745.1 unnamed protein product [Plutella xylostella]	(pident:46.13) unnamed protein product [Plutella xylostella]	(pident:32.34) reverse transcriptase family protein [Enterobacteriaceae endosymbiont of Donacia bicoloricornis]	Null	Null	IPR036691(Endonuclease/exonuclease/phosphatase superfamily)	Null	Null	Null	Null	Null	Null	Null	TRINITY_GG_974_c1_g1_i1
g11900.t1	(pident:52.308) XP_026313905.1 uncharacterized protein LOC113225718 [Hyposmocoma kahamanoa]	(pident:52.31) uncharacterized protein LOC113225718 [Hyposmocoma kahamanoa]	Null	Null	Null	Null	Null	Null	Null	Null	Null	Null	Null	TRINITY_GG_974_c1_g1_i1
g1238.t1	(pident:50.645) PCG80923.1 hypothetical protein B5V51_14599 [Heliothis virescens]	(pident:51.84) hypothetical protein JYU34_012473 [Plutella xylostella]	(pident:39.61) reverse transcriptase family protein [Enterobacteriaceae endosymbiont of Donacia bicoloricornis]	(pident:31.633) Full=Pro-Pol polyprotein; AltName: Full=Pr125Pol; Contains: Full=Protease/Reverse transcriptase/ribonuclease H; AltName: Full=p87Pro-RT-RNaseH; Contains: Full=Protease/Reverse transcriptase; AltName: Full=p65Pro-RT; Contains: Full=Ribonuclease H; Short=RNase H; Contains: Full=Integrase; Short=IN; AltName: Full=p42In [Simian foamy virus (TYPE 3 / STRAIN LK3)]	GO:0003676(nucleic acid binding), GO:0015074(DNA integration)	IPR043502(DNA/RNA polymerase superfamily),IPR041588(Integrase zinc-binding domain),IPR036691(Endonuclease/exonuclease/phosphatase superfamily),IPR036397(Ribonuclease H superfamily),IPR012337(Ribonuclease H-like superfamily),IPR001584(Integrase, catalytic core),IPR000477(Reverse transcriptase domain)	PF00078(Reverse transcriptase (RNA-dependent DNA polymerase)), PF00665(Integrase core domain), PF17921(Integrase zinc binding domain)	Null	Null	Null	Null	Hzea013115.1 Transposon Ty3-G Gag-Pol polyprotein OS=Saccharomyces cerevisiae (strain ATCC 204508 / S288c) OX=559292 GN=TY3B-G PE=1 SV=3	Null	TRINITY_GG_974_c1_g1_i1
g13099.t1	(pident:49.714) PCG80923.1 hypothetical protein B5V51_14599 [Heliothis virescens]	(pident:50.29) hypothetical protein JYU34_020934 [Plutella xylostella]	(pident:42.50) hypothetical protein, partial [Pseudomonas aeruginosa]	Null	Null	IPR036691(Endonuclease/exonuclease/phosphatase superfamily)	Null	Null	Null	Null	Null	Null	Null	TRINITY_GG_974_c1_g1_i1
g14600.t1	(pident:46.479) CAG9137745.1 unnamed protein product [Plutella xylostella]	(pident:46.48) unnamed protein product [Plutella xylostella]	(pident:33.09) reverse transcriptase family protein [Enterobacteriaceae endosymbiont of Donacia bicoloricornis]	Null	Null	IPR036691(Endonuclease/exonuclease/phosphatase superfamily)	Null	Null	Null	Null	Null	Null	Null	TRINITY_GG_974_c1_g1_i1
g16010.t1	(pident:44.292) PCG80923.1 hypothetical protein B5V51_14599 [Heliothis virescens]	(pident:45.57) hypothetical protein JYU34_021394 [Plutella xylostella]	(pident:37.59) reverse transcriptase family protein [Enterobacteriaceae endosymbiont of Donacia bicoloricornis]	(pident:27.945) Full=Probable RNA-directed DNA polymerase from transposon BS; AltName: Full=Reverse transcriptase [Drosophila melanogaster]	Null	IPR043502(DNA/RNA polymerase superfamily),IPR036691(Endonuclease/exonuclease/phosphatase superfamily),IPR000477(Reverse transcriptase domain)	PF00078(Reverse transcriptase (RNA-dependent DNA polymerase))	Null	Null	Null	Null	Null	Null	TRINITY_GG_974_c1_g1_i1
g16179.t1	(pident:46.369) CAG9137745.1 unnamed protein product [Plutella xylostella]	(pident:46.63) unnamed protein product [Plutella xylostella]	(pident:34.83) reverse transcriptase family protein [Enterobacteriaceae endosymbiont of Donacia bicoloricornis]	Null	Null	IPR036691(Endonuclease/exonuclease/phosphatase superfamily)	Null	Null	Null	Null	Null	Null	Null	TRINITY_GG_974_c1_g1_i1
g16404.t1	(pident:47.191) CAG9137745.1 unnamed protein product [Plutella xylostella]	(pident:47.19) unnamed protein product [Plutella xylostella]	(pident:31.91) reverse transcriptase family protein [Enterobacteriaceae endosymbiont of Donacia bicoloricornis]	Null	Null	IPR036691(Endonuclease/exonuclease/phosphatase superfamily)	Null	Null	Null	Null	Null	Nc-a004824.1 RNA-directed DNA polymerase from mobile element jockey OS=Drosophila melanogaster OX=7227 GN=pol PE=1 SV=1	Null	TRINITY_GG_974_c1_g1_i1
g18772.t1	Null	Null	Null	Null	Null	Null	Null	Null	Null	Null	Null	Null	Null	TRINITY_GG_974_c1_g1_i1
g18805.t1	(pident:45.775) CAG9137745.1 unnamed protein product [Plutella xylostella]	(pident:40.28) hypothetical protein JYU34_012473 [Plutella xylostella]	(pident:31.97) reverse transcriptase family protein [Enterobacteriaceae endosymbiont of Donacia bicoloricornis]	Null	Null	IPR000477(Reverse transcriptase domain)	PF00078(Reverse transcriptase (RNA-dependent DNA polymerase))	Null	Null	Null	Null	Null	Null	TRINITY_GG_974_c1_g1_i1
g19166.t1	(pident:46.207) CAG9137745.1 unnamed protein product [Plutella xylostella]	(pident:46.21) unnamed protein product [Plutella xylostella]	(pident:34.64) reverse transcriptase family protein [Enterobacteriaceae endosymbiont of Donacia bicoloricornis]	Null	Null	Null	Null	Null	Null	Null	Null	Hass004004.1 RNA-directed DNA polymerase from mobile element jockey OS=Drosophila melanogaster OX=7227 GN=pol PE=1 SV=1	Null	TRINITY_GG_974_c1_g1_i1
g19179.t1	(pident:41.199) CAG9137745.1 unnamed protein product [Plutella xylostella]	(pident:41.20) unnamed protein product [Plutella xylostella]	(pident:27.38) reverse transcriptase family protein, partial [Pseudomonas stutzeri]	Null	Null	Null	Null	Null	Null	Null	Null	Null	Null	TRINITY_GG_974_c1_g1_i1
g19704.t1	(pident:42.667) CAG9137745.1 unnamed protein product [Plutella xylostella]	(pident:43.24) unnamed protein product [Plutella xylostella]	Null	Null	Null	Null	Null	Null	Null	Null	Null	Phad021376.1 Putative uncharacterized protein	Null	TRINITY_GG_974_c1_g1_i1
g20120.t1	(pident:59.794) XP_037872962.1 uncharacterized protein LOC101736528 isoform X1 [Bombyx mori]	(pident:57.80) uncharacterized protein LOC101736528 isoform X1 [Bombyx mori]	Null	Null	GO:0043565(sequence-specific DNA binding)	IPR038441(THAP-type zinc finger superfamily),IPR026516(THAP domain-containing protein 1),IPR006612(THAP-type zinc finger)	PF05485(THAP domain)	Null	Null	Null	Null	Slit004841.1 Peroxynitrite isomerase THAP4 OS=Bos taurus OX=9913 GN=THAP4 PE=2 SV=2	Null	TRINITY_GG_974_c1_g1_i1
g20555.t1	(pident:46.256) CAG9137745.1 unnamed protein product [Plutella xylostella]	(pident:49.77) hypothetical protein JYU34_020934 [Plutella xylostella]	(pident:32.32) reverse transcriptase family protein [Enterobacteriaceae endosymbiont of Donacia bicoloricornis]	Null	Null	Null	Null	Null	Null	Null	Null	Dsac022337.1 Putative uncharacterized protein	Null	TRINITY_GG_974_c1_g1_i1
g20681.t1	(pident:32.836) PCG67606.1 hypothetical protein B5V51_6177 [Heliothis virescens]	(pident:32.96) hypothetical protein B5V51_6177 [Heliothis virescens]	(pident:72.22) hypothetical protein, partial [Pseudomonas aeruginosa]	Null	Null	Null	Null	Null	Null	Null	Null	Pthe000012.1 Craniofacial development protein 2 OS=Bos taurus OX=9913 GN=CFDP2 PE=1 SV=2	Null	TRINITY_GG_974_c1_g1_i1
g20684.t1	(pident:34.766) CAG9137745.1 unnamed protein product [Plutella xylostella]	(pident:35.43) hypothetical protein B5V51_14599 [Heliothis virescens]	Null	Null	Null	Null	Null	Null	Null	Null	Null	Null	Null	TRINITY_GG_974_c1_g1_i1
g20745.t1	(pident:47.085) CAG9137745.1 unnamed protein product [Plutella xylostella]	(pident:47.09) unnamed protein product [Plutella xylostella]	(pident:34.08) reverse transcriptase family protein [Enterobacteriaceae endosymbiont of Donacia bicoloricornis]	Null	Null	IPR000477(Reverse transcriptase domain)	PF00078(Reverse transcriptase (RNA-dependent DNA polymerase))	Null	Null	Null	Null	Hass004004.1 RNA-directed DNA polymerase from mobile element jockey OS=Drosophila melanogaster OX=7227 GN=pol PE=1 SV=1	Null	TRINITY_GG_974_c1_g1_i1
g20770.t1	Null	(pident:73.53) unnamed protein product [Arctia plantaginis]	Null	Null	Null	Null	Null	Null	Null	Null	Null	Apln008392.1 LINE-1 retrotransposable element ORF2 protein OS=Homo sapiens OX=9606 PE=1 SV=1	Null	TRINITY_GG_974_c1_g1_i1
g20771.t1	(pident:42.424) CAG9137745.1 unnamed protein product [Plutella xylostella]	(pident:42.42) unnamed protein product [Plutella xylostella]	Null	Null	Null	Null	Null	Null	Null	Null	Null	Lphl016225.1 Probable RNA-directed DNA polymerase from transposon BS OS=Drosophila melanogaster OX=7227 GN=RTase PE=2 SV=1	Null	TRINITY_GG_974_c1_g1_i1
g22504.t1	(pident:45.614) CAG9137745.1 unnamed protein product [Plutella xylostella]	(pident:37.23) unnamed protein product [Plutella xylostella]	(pident:34.48) reverse transcriptase family protein [Enterobacteriaceae endosymbiont of Donacia bicoloricornis]	Null	Null	IPR036691(Endonuclease/exonuclease/phosphatase superfamily)	Null	Null	Null	Null	Null	Null	Null	TRINITY_GG_974_c1_g1_i1
g22985.t1	(pident:44.093) PCG80923.1 hypothetical protein B5V51_14599 [Heliothis virescens]	(pident:45.24) hypothetical protein JYU34_021394 [Plutella xylostella]	(pident:38.04) reverse transcriptase family protein [Enterobacteriaceae endosymbiont of Donacia bicoloricornis]	(pident:28.571) Full=Probable RNA-directed DNA polymerase from transposon BS; AltName: Full=Reverse transcriptase [Drosophila melanogaster]	Null	IPR043502(DNA/RNA polymerase superfamily),IPR036691(Endonuclease/exonuclease/phosphatase superfamily),IPR000477(Reverse transcriptase domain)	PF00078(Reverse transcriptase (RNA-dependent DNA polymerase))	Null	Null	Null	Null	Null	Null	TRINITY_GG_974_c1_g1_i1
g23008.t1	(pident:40.625) CAG9137745.1 unnamed protein product [Plutella xylostella]	(pident:33.58) hypothetical protein JYU34_017608 [Plutella xylostella]	Null	Null	Null	Null	Null	Null	Null	Null	Null	Null	Null	TRINITY_GG_974_c1_g1_i1
g23140.t1	(pident:44.928) CAG9137745.1 unnamed protein product [Plutella xylostella]	(pident:44.93) unnamed protein product [Plutella xylostella]	(pident:31.47) reverse transcriptase family protein [Enterobacteriaceae endosymbiont of Donacia bicoloricornis]	Null	Null	Null	Null	Null	Null	Null	Null	Null	Null	TRINITY_GG_974_c1_g1_i1
g23349.t1	(pident:47.799) CAG9137745.1 unnamed protein product [Plutella xylostella]	(pident:48.98) hypothetical protein JYU34_020934 [Plutella xylostella]	(pident:36.00) reverse transcriptase family protein [Enterobacteriaceae endosymbiont of Donacia bicoloricornis]	Null	Null	Null	Null	Null	Null	Null	Null	Dsac022337.1 Putative uncharacterized protein	Null	TRINITY_GG_974_c1_g1_i1
g23471.t1	(pident:35.013) XP_045542568.1 uncharacterized protein LOC123723550 [Papilio machaon]	(pident:32.84) hypothetical protein JYU34_012473 [Plutella xylostella]	(pident:31.11) reverse transcriptase family protein [Enterobacteriaceae endosymbiont of Donacia bicoloricornis]	Null	Null	Null	Null	Null	Null	Null	Null	Null	Null	TRINITY_GG_974_c1_g1_i1
g23573.t1	(pident:46.127) CAG9137745.1 unnamed protein product [Plutella xylostella]	(pident:46.13) unnamed protein product [Plutella xylostella]	(pident:32.71) reverse transcriptase family protein [Enterobacteriaceae endosymbiont of Donacia bicoloricornis]	Null	Null	IPR036691(Endonuclease/exonuclease/phosphatase superfamily)	Null	Null	Null	Null	Null	Null	Null	TRINITY_GG_974_c1_g1_i1
g23614.t1	(pident:50.000) PCG80923.1 hypothetical protein B5V51_14599 [Heliothis virescens]	(pident:51.67) hypothetical protein JYU34_012473 [Plutella xylostella]	(pident:37.41) reverse transcriptase family protein [Enterobacteriaceae endosymbiont of Donacia bicoloricornis]	(pident:28.176) Full=Probable RNA-directed DNA polymerase from transposon BS; AltName: Full=Reverse transcriptase [Drosophila melanogaster]	Null	IPR043502(DNA/RNA polymerase superfamily),IPR000477(Reverse transcriptase domain)	PF00078(Reverse transcriptase (RNA-dependent DNA polymerase))	Null	Null	Null	Null	Hvir000401.1 Probable RNA-directed DNA polymerase from transposon BS OS=Drosophila melanogaster OX=7227 GN=RTase PE=2 SV=1	Null	TRINITY_GG_974_c1_g1_i1
g23878.t1	(pident:46.127) CAG9137745.1 unnamed protein product [Plutella xylostella]	(pident:46.13) unnamed protein product [Plutella xylostella]	(pident:32.34) reverse transcriptase family protein [Enterobacteriaceae endosymbiont of Donacia bicoloricornis]	Null	Null	IPR036691(Endonuclease/exonuclease/phosphatase superfamily)	Null	Null	Null	Null	Null	Null	Null	TRINITY_GG_974_c1_g1_i1
g24081.t1	(pident:45.907) CAG9137745.1 unnamed protein product [Plutella xylostella]	(pident:45.91) unnamed protein product [Plutella xylostella]	(pident:32.71) reverse transcriptase family protein [Enterobacteriaceae endosymbiont of Donacia bicoloricornis]	Null	Null	IPR040676(Domain of unknown function DUF5641),IPR036691(Endonuclease/exonuclease/phosphatase superfamily)	PF18701(Family of unknown function (DUF5641))	Null	Null	Null	Null	Null	Null	TRINITY_GG_974_c1_g1_i1
g24597.t1	(pident:46.127) CAG9137745.1 unnamed protein product [Plutella xylostella]	(pident:46.13) unnamed protein product [Plutella xylostella]	(pident:32.71) reverse transcriptase family protein [Enterobacteriaceae endosymbiont of Donacia bicoloricornis]	Null	Null	IPR036691(Endonuclease/exonuclease/phosphatase superfamily)	Null	Null	Null	Null	Null	Null	Null	TRINITY_GG_974_c1_g1_i1
g24676.t1	(pident:49.784) XP_023944115.1 uncharacterized protein LOC112050162 [Bicyclus anynana]	(pident:50.23) hypothetical protein JYU34_020934 [Plutella xylostella]	(pident:33.17) reverse transcriptase family protein [Enterobacteriaceae endosymbiont of Donacia bicoloricornis]	Null	Null	Null	Null	Null	Null	Null	Null	Dsac022337.1 Putative uncharacterized protein	Null	TRINITY_GG_974_c1_g1_i1
g24823.t1	(pident:46.127) CAG9137745.1 unnamed protein product [Plutella xylostella]	(pident:46.13) unnamed protein product [Plutella xylostella]	(pident:32.34) reverse transcriptase family protein [Enterobacteriaceae endosymbiont of Donacia bicoloricornis]	Null	Null	IPR036691(Endonuclease/exonuclease/phosphatase superfamily)	Null	Null	Null	Null	Null	Null	Null	TRINITY_GG_974_c1_g1_i1
g25912.t1	(pident:46.127) CAG9137745.1 unnamed protein product [Plutella xylostella]	(pident:46.13) unnamed protein product [Plutella xylostella]	(pident:32.71) reverse transcriptase family protein [Enterobacteriaceae endosymbiont of Donacia bicoloricornis]	Null	Null	IPR036691(Endonuclease/exonuclease/phosphatase superfamily)	Null	Null	Null	Null	Null	Null	Null	TRINITY_GG_974_c1_g1_i1
g27125.t1	(pident:43.687) CAG9137745.1 unnamed protein product [Plutella xylostella]	(pident:40.11) hypothetical protein JYU34_012473 [Plutella xylostella]	(pident:37.07) reverse transcriptase family protein [Enterobacteriaceae endosymbiont of Donacia bicoloricornis]	Null	Null	IPR000477(Reverse transcriptase domain)	PF00078(Reverse transcriptase (RNA-dependent DNA polymerase))	Null	Null	Null	Null	Hass004004.1 RNA-directed DNA polymerase from mobile element jockey OS=Drosophila melanogaster OX=7227 GN=pol PE=1 SV=1	Null	TRINITY_GG_974_c1_g1_i1
g29109.t1	(pident:48.393) CAB3227417.1 unnamed protein product [Arctia plantaginis]	(pident:51.92) hypothetical protein B5X24_HaOG214647 [Helicoverpa armigera]	(pident:36.30) reverse transcriptase family protein [Anaplasma phagocytophilum]	(pident:25.867) Full=Putative 115 kDa protein in type-1 retrotransposable element R1DM; AltName: Full=ORF 2; AltName: Full=Putative 115 kDa protein in type I retrotransposable element R1DM [Drosophila melanogaster]	Null	IPR043502(DNA/RNA polymerase superfamily),IPR000477(Reverse transcriptase domain)	PF00078(Reverse transcriptase (RNA-dependent DNA polymerase))	Null	Null	Null	Null	Efus016902.1 Probable RNA-directed DNA polymerase from transposon BS OS=Drosophila melanogaster OX=7227 GN=RTase PE=2 SV=1	Null	TRINITY_GG_974_c1_g1_i1
g2914.t1	(pident:47.812) CAG9137745.1 unnamed protein product [Plutella xylostella]	(pident:47.81) unnamed protein product [Plutella xylostella]	(pident:35.08) reverse transcriptase family protein [Enterobacteriaceae endosymbiont of Donacia bicoloricornis]	Null	Null	IPR000477(Reverse transcriptase domain)	PF00078(Reverse transcriptase (RNA-dependent DNA polymerase))	Null	Null	Null	Null	Hass004004.1 RNA-directed DNA polymerase from mobile element jockey OS=Drosophila melanogaster OX=7227 GN=pol PE=1 SV=1	Null	TRINITY_GG_974_c1_g1_i1
g29356.t1	(pident:47.500) CAG9137745.1 unnamed protein product [Plutella xylostella]	(pident:47.50) unnamed protein product [Plutella xylostella]	(pident:34.75) reverse transcriptase family protein [Enterobacteriaceae endosymbiont of Donacia bicoloricornis]	Null	Null	IPR000477(Reverse transcriptase domain)	PF00078(Reverse transcriptase (RNA-dependent DNA polymerase))	Null	Null	Null	Null	Hass004004.1 RNA-directed DNA polymerase from mobile element jockey OS=Drosophila melanogaster OX=7227 GN=pol PE=1 SV=1	Null	TRINITY_GG_974_c1_g1_i1
g29513.t1	(pident:46.479) CAG9137745.1 unnamed protein product [Plutella xylostella]	(pident:46.48) unnamed protein product [Plutella xylostella]	(pident:32.47) reverse transcriptase family protein [Enterobacteriaceae endosymbiont of Donacia bicoloricornis]	Null	Null	Null	Null	Null	Null	Null	Null	Vcar019532.1 RNA-directed DNA polymerase from mobile element jockey OS=Drosophila funebris OX=7221 GN=jockey\pol PE=1 SV=1	Null	TRINITY_GG_974_c1_g1_i1
g29663.t1	(pident:43.902) CAG9137745.1 unnamed protein product [Plutella xylostella]	(pident:47.54) uncharacterized protein LOC118265091 [Spodoptera frugiperda]	(pident:31.30) reverse transcriptase family protein [Enterobacteriaceae endosymbiont of Donacia bicoloricornis]	Null	Null	IPR036691(Endonuclease/exonuclease/phosphatase superfamily)	Null	Null	Null	Null	Null	Null	Null	TRINITY_GG_974_c1_g1_i1
g32243.t1	(pident:46.127) CAG9137745.1 unnamed protein product [Plutella xylostella]	(pident:46.13) unnamed protein product [Plutella xylostella]	(pident:32.71) reverse transcriptase family protein [Enterobacteriaceae endosymbiont of Donacia bicoloricornis]	Null	Null	IPR036691(Endonuclease/exonuclease/phosphatase superfamily)	Null	Null	Null	Null	Null	Null	Null	TRINITY_GG_974_c1_g1_i1
g32393.t1	(pident:47.812) CAG9137745.1 unnamed protein product [Plutella xylostella]	(pident:47.81) unnamed protein product [Plutella xylostella]	(pident:35.41) reverse transcriptase family protein [Enterobacteriaceae endosymbiont of Donacia bicoloricornis]	Null	Null	IPR000477(Reverse transcriptase domain)	PF00078(Reverse transcriptase (RNA-dependent DNA polymerase))	Null	Null	Null	Null	Hass004004.1 RNA-directed DNA polymerase from mobile element jockey OS=Drosophila melanogaster OX=7227 GN=pol PE=1 SV=1	Null	TRINITY_GG_974_c1_g1_i1
g33929.t1	(pident:50.450) XP_023944115.1 uncharacterized protein LOC112050162 [Bicyclus anynana]	(pident:50.23) hypothetical protein JYU34_020934 [Plutella xylostella]	(pident:33.17) reverse transcriptase family protein [Enterobacteriaceae endosymbiont of Donacia bicoloricornis]	Null	Null	Null	Null	Null	Null	Null	Null	Dsac022337.1 Putative uncharacterized protein	Null	TRINITY_GG_974_c1_g1_i1
g34610.t1	(pident:50.955) PCG80923.1 hypothetical protein B5V51_14599 [Heliothis virescens]	(pident:53.16) hypothetical protein JYU34_020934 [Plutella xylostella]	(pident:43.59) hypothetical protein, partial [Pseudomonas aeruginosa]	Null	Null	Null	Null	Null	Null	Null	Null	Efla012258.1 Putative uncharacterized protein	Null	TRINITY_GG_974_c1_g1_i1
g34639.t1	(pident:41.696) CAG9137745.1 unnamed protein product [Plutella xylostella]	(pident:43.46) hypothetical protein B5V51_14599 [Heliothis virescens]	(pident:30.50) reverse transcriptase family protein [Enterobacteriaceae endosymbiont of Donacia bicoloricornis]	Null	Null	Null	Null	Null	Null	Null	Null	Null	Null	TRINITY_GG_974_c1_g1_i1
g35952.t1	(pident:48.438) CAG9137745.1 unnamed protein product [Plutella xylostella]	(pident:37.08) hypothetical protein JYU34_012473 [Plutella xylostella]	(pident:35.95) reverse transcriptase family protein [Enterobacteriaceae endosymbiont of Donacia bicoloricornis]	(pident:29.956) Full=Probable RNA-directed DNA polymerase from transposon BS; AltName: Full=Reverse transcriptase [Drosophila melanogaster]	Null	IPR043502(DNA/RNA polymerase superfamily),IPR000477(Reverse transcriptase domain)	PF00078(Reverse transcriptase (RNA-dependent DNA polymerase))	Null	Null	Null	Null	Hass004004.1 RNA-directed DNA polymerase from mobile element jockey OS=Drosophila melanogaster OX=7227 GN=pol PE=1 SV=1	Null	TRINITY_GG_974_c1_g1_i1
g36046.t1	(pident:46.179) CAG9137745.1 unnamed protein product [Plutella xylostella]	(pident:40.72) unnamed protein product [Plutella xylostella]	(pident:33.22) reverse transcriptase family protein [Enterobacteriaceae endosymbiont of Donacia bicoloricornis]	Null	Null	IPR036691(Endonuclease/exonuclease/phosphatase superfamily)	Null	Null	Null	Null	Null	Null	Null	TRINITY_GG_974_c1_g1_i1
g36500.t1	(pident:47.191) CAG9137745.1 unnamed protein product [Plutella xylostella]	(pident:47.19) unnamed protein product [Plutella xylostella]	(pident:31.91) reverse transcriptase family protein [Enterobacteriaceae endosymbiont of Donacia bicoloricornis]	Null	Null	IPR036691(Endonuclease/exonuclease/phosphatase superfamily)	Null	Null	Null	Null	Null	Nc-a004824.1 RNA-directed DNA polymerase from mobile element jockey OS=Drosophila melanogaster OX=7227 GN=pol PE=1 SV=1	Null	TRINITY_GG_974_c1_g1_i1
g36504.t1	(pident:46.127) CAG9137745.1 unnamed protein product [Plutella xylostella]	(pident:46.13) unnamed protein product [Plutella xylostella]	(pident:32.71) reverse transcriptase family protein [Enterobacteriaceae endosymbiont of Donacia bicoloricornis]	Null	Null	Null	Null	Null	Null	Null	Null	Sfru015432.1 Probable RNA-directed DNA polymerase from transposon BS OS=Drosophila melanogaster OX=7227 GN=RTase PE=2 SV=1	Null	TRINITY_GG_974_c1_g1_i1
g37471.t1	(pident:50.000) XP_023944115.1 uncharacterized protein LOC112050162 [Bicyclus anynana]	(pident:50.23) hypothetical protein JYU34_020934 [Plutella xylostella]	(pident:32.51) reverse transcriptase family protein [Enterobacteriaceae endosymbiont of Donacia bicoloricornis]	Null	Null	Null	Null	Null	Null	Null	Null	Efla012258.1 Putative uncharacterized protein	Null	TRINITY_GG_974_c1_g1_i1
g37472.t1	(pident:45.588) KOB76672.1 putative reverse transcriptase [Operophtera brumata]	(pident:48.15) unnamed protein product [Arctia plantaginis]	Null	Null	Null	IPR036691(Endonuclease/exonuclease/phosphatase superfamily)	Null	Null	Null	Null	Null	Gmel001677.1 Putative uncharacterized protein	Null	TRINITY_GG_974_c1_g1_i1
g4025.t1	(pident:46.753) XP_045448756.1 uncharacterized protein LOC123657224 [Melitaea cinxia]	(pident:45.45) unnamed protein product [Plutella xylostella]	Null	Null	Null	Null	Null	Null	Null	Null	Null	Lphl016225.1 Probable RNA-directed DNA polymerase from transposon BS OS=Drosophila melanogaster OX=7227 GN=RTase PE=2 SV=1	Null	TRINITY_GG_974_c1_g1_i1
g4026.t1	(pident:49.296) PCG80923.1 hypothetical protein B5V51_14599 [Heliothis virescens]	(pident:54.55) hypothetical protein B5V51_14599 [Heliothis virescens]	Null	Null	Null	Null	Null	Null	Null	Null	Null	Dsac029589.1 Fasciclin-3 OS=Drosophila melanogaster OX=7227 GN=Fas3 PE=1 SV=1	Null	TRINITY_GG_974_c1_g1_i1
g4729.t1	(pident:48.860) CAG9137745.1 unnamed protein product [Plutella xylostella]	(pident:50.65) hypothetical protein B5V51_14599 [Heliothis virescens]	(pident:35.23) reverse transcriptase family protein [Enterobacteriaceae endosymbiont of Donacia bicoloricornis]	Null	Null	IPR000477(Reverse transcriptase domain)	PF00078(Reverse transcriptase (RNA-dependent DNA polymerase))	Null	Null	Null	Null	Hass004004.1 RNA-directed DNA polymerase from mobile element jockey OS=Drosophila melanogaster OX=7227 GN=pol PE=1 SV=1	Null	TRINITY_GG_974_c1_g1_i1
g651.t1	(pident:46.479) CAG9137745.1 unnamed protein product [Plutella xylostella]	(pident:39.89) hypothetical protein JYU34_012473 [Plutella xylostella]	(pident:26.43) endonuclease/exonuclease/phosphatase family protein [Escherichia coli]	Null	Null	IPR000477(Reverse transcriptase domain)	PF00078(Reverse transcriptase (RNA-dependent DNA polymerase))	Null	Null	Null	Null	Null	Null	TRINITY_GG_974_c1_g1_i1
g7410.t1	(pident:46.127) CAG9137745.1 unnamed protein product [Plutella xylostella]	(pident:46.13) unnamed protein product [Plutella xylostella]	(pident:32.71) reverse transcriptase family protein [Enterobacteriaceae endosymbiont of Donacia bicoloricornis]	Null	Null	IPR036691(Endonuclease/exonuclease/phosphatase superfamily)	Null	Null	Null	Null	Null	Null	Null	TRINITY_GG_974_c1_g1_i1
g7576.t1	(pident:45.965) CAG9137745.1 unnamed protein product [Plutella xylostella]	(pident:45.96) unnamed protein product [Plutella xylostella]	(pident:32.96) reverse transcriptase family protein [Enterobacteriaceae endosymbiont of Donacia bicoloricornis]	Null	Null	IPR036691(Endonuclease/exonuclease/phosphatase superfamily)	Null	Null	Null	Null	Null	Null	Null	TRINITY_GG_974_c1_g1_i1
g8133.t1	(pident:47.222) CAG9137745.1 unnamed protein product [Plutella xylostella]	(pident:47.22) unnamed protein product [Plutella xylostella]	(pident:35.05) reverse transcriptase family protein [Enterobacteriaceae endosymbiont of Donacia bicoloricornis]	Null	Null	IPR036691(Endonuclease/exonuclease/phosphatase superfamily)	Null	Null	Null	Null	Null	Null	Null	TRINITY_GG_974_c1_g1_i1
g8452.t1	(pident:46.479) CAG9137745.1 unnamed protein product [Plutella xylostella]	(pident:46.48) unnamed protein product [Plutella xylostella]	(pident:33.09) reverse transcriptase family protein [Enterobacteriaceae endosymbiont of Donacia bicoloricornis]	Null	Null	IPR036691(Endonuclease/exonuclease/phosphatase superfamily)	Null	Null	Null	Null	Null	Null	Null	TRINITY_GG_974_c1_g1_i1
g8470.t1	(pident:49.776) XP_023944115.1 uncharacterized protein LOC112050162 [Bicyclus anynana]	(pident:49.77) hypothetical protein JYU34_020934 [Plutella xylostella]	(pident:33.17) reverse transcriptase family protein [Enterobacteriaceae endosymbiont of Donacia bicoloricornis]	Null	Null	Null	Null	Null	Null	Null	Null	Hass004028.1 Putative uncharacterized protein	Null	TRINITY_GG_974_c1_g1_i1
g9667.t1	(pident:46.512) CAG9137745.1 unnamed protein product [Plutella xylostella]	(pident:41.00) unnamed protein product [Plutella xylostella]	(pident:33.22) reverse transcriptase family protein [Enterobacteriaceae endosymbiont of Donacia bicoloricornis]	Null	Null	IPR036691(Endonuclease/exonuclease/phosphatase superfamily)	Null	Null	Null	Null	Null	Null	Null	TRINITY_GG_974_c1_g1_i1
g37122.t1	(pident:37.333) XP_041976197.1 protein Jumonji isoform X8 [Aricia agestis]	(pident:44.62) hypothetical protein JYU34_000346 [Plutella xylostella]<>hypothetical protein JYU34_000346 [Plutella xylostella]	Null	(pident:30.826) Full=Protein Jumonji; AltName: Full=Jumonji/ARID domain-containing protein 2 [Gallus gallus]	GO:0003677(DNA binding)	IPR036431(ARID DNA-binding domain superfamily),IPR004198(Zinc finger, C5HC2-type),IPR003349(JmjN domain),IPR003347(JmjC domain),IPR001606(ARID DNA-binding domain)	PF01388(ARID/BRIGHT DNA binding domain), PF02373(JmjC domain, hydroxylase), PF02375(jmjN domain), PF02928(C5HC2 zinc finger)	Null	Null	Null	Null	Mtil006080.1 Protein Jumonji OS=Homo sapiens OX=9606 GN=JARID2 PE=1 SV=2	Null	TRINITY_GG_97_c10_g1_i1
g26315.t1	(pident:83.484) XP_028029074.1 DNA topoisomerase 2 isoform X2 [Bombyx mandarina]	(pident:84.89) DNA topoisomerase 2 isoform X3 [Plutella xylostella]<>DNA topoisomerase 2 isoform X4 [Plutella xylostella]	(pident:47.72) hypothetical protein, partial [Microvirga massiliensis]	(pident:82.106) Full=DNA topoisomerase 2; AltName: Full=DNA topoisomerase II; Short=TOPOII [Bombyx mori]	GO:0003677(DNA binding), GO:0003918(DNA topoisomerase type II (double strand cut, ATP-hydrolyzing) activity), GO:0005524(ATP binding), GO:0006259(DNA metabolic process), GO:0006265(DNA topological change)	IPR036890(Histidine kinase/HSP90-like ATPase superfamily),IPR034157(DNA topoisomerase 2, TOPRIM domain),IPR031660(C-terminal associated domain of TOPRIM),IPR020568(Ribosomal protein S5 domain 2-type fold),IPR018522(DNA topoisomerase, type IIA, conserved site),IPR014721(Ribosomal protein S5 domain 2-type fold, subgroup),IPR013760(DNA topoisomerase, type IIA-like domain superfamily),IPR013759(DNA t…	PF00204(DNA gyrase B), PF00521(DNA gyrase/topoisomerase IV, subunit A), PF01751(Toprim domain), PF02518(Histidine kinase-, DNA gyrase B-, and HSP90-like ATPase), PF16898(C-terminal associated domain of TOPRIM)	Null	6ZY5_A Chain A, DNA topoisomerase 2-alpha [Homo sapiens] /6ZY5_B Chain B, DNA topoisomerase 2-alpha [Homo sapiens] /6ZY6_A Chain A, DNA topoisomerase 2-alpha [Homo sapiens] /6ZY6_B Chain B, DNA topoisomerase 2-alpha [Homo sapiens] /6ZY7_A Chain A, DNA topoisomerase 2-alpha [Homo sapiens] /6ZY7_B Chain B, DNA topoisomerase 2-alpha [Homo sapiens] /6ZY8_A Chain A, DNA topoisomerase 2-alpha [Homo sap…	Null	Null	Papo003411.1 DNA topoisomerase 2 OS=Bombyx mori OX=7091 GN=TOP2 PE=2 SV=1	Null	TRINITY_GG_97_c1_g1_i6
g37126.t1	(pident:83.355) XP_028029074.1 DNA topoisomerase 2 isoform X2 [Bombyx mandarina]	(pident:84.83) DNA topoisomerase 2 isoform X3 [Plutella xylostella]<>DNA topoisomerase 2 isoform X4 [Plutella xylostella]	(pident:47.72) hypothetical protein, partial [Microvirga massiliensis]	(pident:82.041) Full=DNA topoisomerase 2; AltName: Full=DNA topoisomerase II; Short=TOPOII [Bombyx mori]	GO:0003677(DNA binding), GO:0003918(DNA topoisomerase type II (double strand cut, ATP-hydrolyzing) activity), GO:0005524(ATP binding), GO:0006259(DNA metabolic process), GO:0006265(DNA topological change)	IPR036890(Histidine kinase/HSP90-like ATPase superfamily),IPR034157(DNA topoisomerase 2, TOPRIM domain),IPR031660(C-terminal associated domain of TOPRIM),IPR020568(Ribosomal protein S5 domain 2-type fold),IPR018522(DNA topoisomerase, type IIA, conserved site),IPR014721(Ribosomal protein S5 domain 2-type fold, subgroup),IPR013760(DNA topoisomerase, type IIA-like domain superfamily),IPR013759(DNA t…	PF00204(DNA gyrase B), PF00521(DNA gyrase/topoisomerase IV, subunit A), PF01751(Toprim domain), PF02518(Histidine kinase-, DNA gyrase B-, and HSP90-like ATPase), PF16898(C-terminal associated domain of TOPRIM)	Null	6ZY5_A Chain A, DNA topoisomerase 2-alpha [Homo sapiens] /6ZY5_B Chain B, DNA topoisomerase 2-alpha [Homo sapiens] /6ZY6_A Chain A, DNA topoisomerase 2-alpha [Homo sapiens] /6ZY6_B Chain B, DNA topoisomerase 2-alpha [Homo sapiens] /6ZY7_A Chain A, DNA topoisomerase 2-alpha [Homo sapiens] /6ZY7_B Chain B, DNA topoisomerase 2-alpha [Homo sapiens] /6ZY8_A Chain A, DNA topoisomerase 2-alpha [Homo sap…	Null	Null	Papo003411.1 DNA topoisomerase 2 OS=Bombyx mori OX=7091 GN=TOP2 PE=2 SV=1	Null	TRINITY_GG_97_c1_g1_i6
g26316.t1	(pident:86.477) XP_026733939.1 uncharacterized protein LOC113498198 [Trichoplusia ni]	(pident:85.41) uncharacterized protein LOC115453665 [Manduca sexta]<>uncharacterized protein LOC115453665 [Manduca sexta]<>uncharacterized protein LOC115453665 [Manduca sexta]<>uncharacterized protein LOC115453665 [Manduca sexta]<>uncharacterized protein LOC115453665 [Manduca sexta]	Null	Null	Null	Null	Null	Null	Null	Null	Null	Lacc008903.1 Putative uncharacterized protein	Null	TRINITY_GG_97_c0_g1_i4
g37125.t1	(pident:86.477) XP_026733939.1 uncharacterized protein LOC113498198 [Trichoplusia ni]	(pident:86.48) uncharacterized protein LOC113498198 [Trichoplusia ni]	Null	Null	Null	Null	Null	Null	Null	Null	Null	Lacc008903.1 Putative uncharacterized protein	Null	TRINITY_GG_97_c0_g1_i4
g24896.t1	(pident:69.591) CAB3230260.1 unnamed protein product [Arctia plantaginis]	(pident:69.59) unnamed protein product [Arctia plantaginis]<>unnamed protein product [Arctia plantaginis]	(pident:46.27) MULTISPECIES: nucleoside-diphosphate kinase [Gilliamella]	(pident:46.250) Full=Nucleoside diphosphate kinase 6; Short=NDK 6; Short=NDP kinase 6; AltName: Full=nm23-M6 [Mus musculus]	GO:0004550(nucleoside diphosphate kinase activity), GO:0006165(nucleoside diphosphate phosphorylation), GO:0006183(GTP biosynthetic process), GO:0006228(UTP biosynthetic process), GO:0006241(CTP biosynthetic process)	IPR036850(Nucleoside diphosphate kinase-like domain superfamily),IPR034907(Nucleoside diphosphate kinase-like domain),IPR001564(Nucleoside diphosphate kinase)	PF00334(Nucleoside diphosphate kinase)	Null	Null	Null	Null	Dsac016496.1 Nucleoside diphosphate kinase 6 OS=Homo sapiens OX=9606 GN=NME6 PE=1 SV=3	Null	TRINITY_GG_966_c0_g1_i8
g8995.t1	(pident:69.591) CAB3230260.1 unnamed protein product [Arctia plantaginis]	(pident:69.59) unnamed protein product [Arctia plantaginis]<>unnamed protein product [Arctia plantaginis]	(pident:46.27) MULTISPECIES: nucleoside-diphosphate kinase [Gilliamella]	(pident:46.250) Full=Nucleoside diphosphate kinase 6; Short=NDK 6; Short=NDP kinase 6; AltName: Full=nm23-M6 [Mus musculus]	GO:0004550(nucleoside diphosphate kinase activity), GO:0006165(nucleoside diphosphate phosphorylation), GO:0006183(GTP biosynthetic process), GO:0006228(UTP biosynthetic process), GO:0006241(CTP biosynthetic process)	IPR036850(Nucleoside diphosphate kinase-like domain superfamily),IPR034907(Nucleoside diphosphate kinase-like domain),IPR001564(Nucleoside diphosphate kinase)	PF00334(Nucleoside diphosphate kinase)	Null	Null	Null	Null	Dsac016496.1 Nucleoside diphosphate kinase 6 OS=Homo sapiens OX=9606 GN=NME6 PE=1 SV=3	Null	TRINITY_GG_966_c0_g1_i8
g24897.t1	(pident:84.483) XP_022823196.1 U5 small nuclear ribonucleoprotein 40 kDa protein [Spodoptera litura]	(pident:85.34) hypothetical protein SFRURICE_004382 [Spodoptera frugiperda]<>hypothetical protein SFRURICE_014413 [Spodoptera frugiperda]<>hypothetical protein SFRUCORN_001444 [Spodoptera frugiperda]	Null	(pident:60.674) Full=U5 small nuclear ribonucleoprotein 40 kDa protein; Short=U5 snRNP 40 kDa protein; Short=U5-40K; AltName: Full=38 kDa-splicing factor; AltName: Full=Prp8-binding protein; Short=hPRP8BP; AltName: Full=U5 snRNP-specific 40 kDa protein; AltName: Full=WD repeat-containing protein 57 [Homo sapiens]	GO:0005515(protein binding)	IPR036322(WD40-repeat-containing domain superfamily),IPR020472(G-protein beta WD-40 repeat),IPR019775(WD40 repeat, conserved site),IPR015943(WD40/YVTN repeat-like-containing domain superfamily),IPR001680(WD40 repeat)	PF00400(WD domain, G-beta repeat)	Null	3JCR_D 3D structure determination of the human*U4/U6.U5* tri-snRNP complex [Homo sapiens] /5MQF_F Cryo-EM structure of a human spliceosome activated for step 2 of splicing (C* complex) [Homo sapiens] /5O9Z_D Cryo-EM structure of a pre-catalytic human spliceosome primed for activation (B complex) [Homo sapiens] /5XJC_E Cryo-EM structure of the human spliceosome just prior to exon ligation at 3.6 a…	Null	CAD7241147.1 unnamed protein product [Darwinula stevensoni]	Pari033194.1 U5 small nuclear ribonucleoprotein 40 kDa protein OS=Mus musculus OX=10090 GN=Snrnp40 PE=1 SV=1	Null	TRINITY_GG_964_c0_g1_i10
g8996.t1	(pident:84.483) XP_022823196.1 U5 small nuclear ribonucleoprotein 40 kDa protein [Spodoptera litura]	(pident:85.34) hypothetical protein SFRURICE_004382 [Spodoptera frugiperda]<>hypothetical protein SFRURICE_014413 [Spodoptera frugiperda]<>hypothetical protein SFRUCORN_001444 [Spodoptera frugiperda]	Null	(pident:60.674) Full=U5 small nuclear ribonucleoprotein 40 kDa protein; Short=U5 snRNP 40 kDa protein; Short=U5-40K; AltName: Full=38 kDa-splicing factor; AltName: Full=Prp8-binding protein; Short=hPRP8BP; AltName: Full=U5 snRNP-specific 40 kDa protein; AltName: Full=WD repeat-containing protein 57 [Homo sapiens]	GO:0005515(protein binding)	IPR036322(WD40-repeat-containing domain superfamily),IPR020472(G-protein beta WD-40 repeat),IPR019775(WD40 repeat, conserved site),IPR015943(WD40/YVTN repeat-like-containing domain superfamily),IPR001680(WD40 repeat)	PF00400(WD domain, G-beta repeat)	Null	3JCR_D 3D structure determination of the human*U4/U6.U5* tri-snRNP complex [Homo sapiens] /5MQF_F Cryo-EM structure of a human spliceosome activated for step 2 of splicing (C* complex) [Homo sapiens] /5O9Z_D Cryo-EM structure of a pre-catalytic human spliceosome primed for activation (B complex) [Homo sapiens] /5XJC_E Cryo-EM structure of the human spliceosome just prior to exon ligation at 3.6 a…	Null	CAD7241147.1 unnamed protein product [Darwinula stevensoni]	Pari033194.1 U5 small nuclear ribonucleoprotein 40 kDa protein OS=Mus musculus OX=10090 GN=Snrnp40 PE=1 SV=1	Null	TRINITY_GG_964_c0_g1_i10
g24894.t1	(pident:53.772) XP_021195835.1 nucleolar pre-ribosomal-associated protein 1 [Helicoverpa armigera]	(pident:53.77) nucleolar pre-ribosomal-associated protein 1 [Helicoverpa armigera]<>hypothetical protein B5X24_HaOG208746 [Helicoverpa armigera]	Null	(pident:26.916) Full=Nucleolar pre-ribosomal-associated protein 1; AltName: Full=Nucleolar protein 254 kDa; AltName: Full=URB1 ribosome biogenesis 1 homolog [Homo sapiens]	Null	IPR039844(Nucleolar pre-ribosomal-associated protein 1),IPR032436(Nucleolar pre-ribosomal-associated protein 1, C-terminal domain),IPR021714(Nucleolar pre-ribosomal-associated protein 1, N-terminal)	PF11707(Ribosome 60S biogenesis N-terminal), PF16201(Nucleolar pre-ribosomal-associated protein 1)	Null	Null	Null	Null	Ahon011397.1 Nucleolar pre-ribosomal-associated protein 1 OS=Mus musculus OX=10090 GN=Urb1 PE=1 SV=2	Null	TRINITY_GG_963_c1_g1_i1
g8993.t1	(pident:53.519) XP_021195835.1 nucleolar pre-ribosomal-associated protein 1 [Helicoverpa armigera]	(pident:53.52) nucleolar pre-ribosomal-associated protein 1 [Helicoverpa armigera]<>hypothetical protein B5X24_HaOG208746 [Helicoverpa armigera]	Null	(pident:27.129) Full=Nucleolar pre-ribosomal-associated protein 1; AltName: Full=Nucleolar protein 254 kDa; AltName: Full=URB1 ribosome biogenesis 1 homolog [Homo sapiens]	Null	IPR039844(Nucleolar pre-ribosomal-associated protein 1),IPR032436(Nucleolar pre-ribosomal-associated protein 1, C-terminal domain),IPR021714(Nucleolar pre-ribosomal-associated protein 1, N-terminal)	PF11707(Ribosome 60S biogenesis N-terminal), PF16201(Nucleolar pre-ribosomal-associated protein 1)	Null	Null	Null	Null	Mcon008081.1 Nucleolar pre-ribosomal-associated protein 1 OS=Homo sapiens OX=9606 GN=URB1 PE=1 SV=4	Null	TRINITY_GG_963_c1_g1_i1
g8992.t1	Null	Null	Null	Null	Null	Null	Null	Null	Null	Null	Null	Null	Null	TRINITY_GG_961_c0_g1_i1
g24895.t1	(pident:44.170) CAB3230257.1 unnamed protein product [Arctia plantaginis]	(pident:63.35) PREDICTED: nucleoporin-like protein 2 [Amyelois transitella]	Null	(pident:25.636) Full=Nucleoporin-like protein amo1; AltName: Full=Aberrant microtubule protein 1 [Schizosaccharomyces pombe 972h-]	GO:0046872(metal ion binding)	IPR041367(E3 ligase, CCCH-type zinc finger),IPR036855(Zinc finger, CCCH-type superfamily),IPR000571(Zinc finger, CCCH-type)	PF18044(CCCH-type zinc finger)	Null	Null	Null	Null	Atrn012311.1 Nucleoporin-like protein amo1 OS=Schizosaccharomyces pombe (strain 972 / ATCC 24843) OX=284812 GN=amo1 PE=4 SV=1	Null	TRINITY_GG_960_c0_g1_i2
g8994.t1	(pident:43.722) CAB3230257.1 unnamed protein product [Arctia plantaginis]	(pident:62.24) PREDICTED: nucleoporin-like protein 2 [Amyelois transitella]	Null	(pident:28.894) Full=Nucleoporin AMO1; AltName: Full=Nuclear pore protein AMO1 [Chaetomium thermophilum var. thermophilum DSM 1495]	GO:0046872(metal ion binding)	IPR041367(E3 ligase, CCCH-type zinc finger),IPR036855(Zinc finger, CCCH-type superfamily),IPR000571(Zinc finger, CCCH-type)	PF18044(CCCH-type zinc finger)	Null	Null	Null	Null	Atrn012311.1 Nucleoporin-like protein amo1 OS=Schizosaccharomyces pombe (strain 972 / ATCC 24843) OX=284812 GN=amo1 PE=4 SV=1	Null	TRINITY_GG_960_c0_g1_i2
g27003.t1	(pident:63.269) XP_013191141.1 PREDICTED: E3 ubiquitin-protein ligase RNF8-like isoform X3 [Amyelois transitella]	(pident:50.00) hypothetical protein JYU34_009146 [Plutella xylostella]	Null	(pident:32.661) Full=E3 ubiquitin-protein ligase RNF8; AltName: Full=RING finger protein 8; AltName: Full=RING-type E3 ubiquitin transferase RNF8 [Pongo abelii]	GO:0005515(protein binding)	IPR017907(Zinc finger, RING-type, conserved site),IPR013083(Zinc finger, RING/FYVE/PHD-type),IPR008984(SMAD/FHA domain superfamily),IPR001841(Zinc finger, RING-type),IPR000253(Forkhead-associated (FHA) domain)	PF00498(FHA domain), PF13920(Zinc finger, C3HC4 type (RING finger))	Null	4AYC_B RNF8 RING domain structure [Homo sapiens]	Null	Null	Pxyl000376.1 E3 ubiquitin-protein ligase rnf8-B OS=Xenopus laevis OX=8355 GN=rnf8-B PE=2 SV=1	Null	TRINITY_GG_958_c1_g1_i2
g37605.t1	(pident:63.445) XP_013191140.1 PREDICTED: E3 ubiquitin-protein ligase RNF8-like isoform X2 [Amyelois transitella]	(pident:50.17) hypothetical protein JYU34_009146 [Plutella xylostella]	Null	(pident:32.579) Full=E3 ubiquitin-protein ligase RNF8; Short=hRNF8; AltName: Full=RING finger protein 8; AltName: Full=RING-type E3 ubiquitin transferase RNF8 [Homo sapiens]	GO:0005515(protein binding)	IPR017907(Zinc finger, RING-type, conserved site),IPR013083(Zinc finger, RING/FYVE/PHD-type),IPR008984(SMAD/FHA domain superfamily),IPR001841(Zinc finger, RING-type),IPR000253(Forkhead-associated (FHA) domain)	PF00498(FHA domain), PF13923(Zinc finger, C3HC4 type (RING finger))	Null	4AYC_B RNF8 RING domain structure [Homo sapiens]	Null	Null	Pxyl000376.1 E3 ubiquitin-protein ligase rnf8-B OS=Xenopus laevis OX=8355 GN=rnf8-B PE=2 SV=1	Null	TRINITY_GG_958_c1_g1_i2
g27004.t1	(pident:29.167) XP_022116738.2 uncharacterized protein LOC110994423 isoform X1 [Pieris rapae]	Null	Null	Null	Null	Null	Null	Null	Null	Null	Null	Null	Null	TRINITY_GG_957_c0_g1_i1
g37603.t1	(pident:28.634) XP_022116738.2 uncharacterized protein LOC110994423 isoform X1 [Pieris rapae]	(pident:28.06) uncharacterized protein LOC119190531 [Manduca sexta]	Null	Null	Null	Null	Null	Null	Null	Null	Null	Null	Null	TRINITY_GG_957_c0_g1_i1
g22164.t1	(pident:60.262) XP_026486476.1 uncharacterized protein LOC113393685 isoform X1 [Vanessa tameamea]	(pident:56.94) uncharacterized protein LOC123869879 isoform X3 [Maniola jurtina]	Null	Null	Null	Null	Null	Null	Null	Null	Null	Paeg005705.1 Putative uncharacterized protein	Null	TRINITY_GG_945_c0_g1_i2
g30933.t1	(pident:64.017) XP_037974925.1 uncharacterized protein LOC105394052 isoform X1 [Plutella xylostella]	(pident:58.68) uncharacterized protein LOC123869879 isoform X3 [Maniola jurtina]	Null	Null	Null	Null	Null	Null	Null	Null	Null	Mhyp004478.1 Putative uncharacterized protein	Null	TRINITY_GG_945_c0_g1_i2
g7675.t1	(pident:61.569) XP_026486476.1 uncharacterized protein LOC113393685 isoform X1 [Vanessa tameamea]	(pident:58.68) uncharacterized protein LOC123869879 isoform X3 [Maniola jurtina]	Null	Null	Null	Null	Null	Null	Null	Null	Null	Mhyp004478.1 Putative uncharacterized protein	Null	TRINITY_GG_945_c0_g1_i2
g11056.t1	(pident:65.663) CAG9135688.1 unnamed protein product [Plutella xylostella]	(pident:65.66) unnamed protein product [Plutella xylostella]	(pident:61.11) hypothetical protein, partial [Pseudomonas aeruginosa]	Null	Null	Null	Null	Null	Null	Null	Null	Csup004500.1 Putative uncharacterized protein	Null	TRINITY_GG_942_c2_g1_i1
g11378.t1	Null	Null	Null	Null	Null	Null	Null	Null	Null	Null	Null	Null	Null	TRINITY_GG_942_c2_g1_i1
g12491.t1	(pident:62.097) XP_023952787.1 uncharacterized protein LOC112056575 [Bicyclus anynana]	(pident:62.10) uncharacterized protein LOC112056575 [Bicyclus anynana]	Null	Null	Null	Null	Null	Null	Null	Null	Null	Zfil003296.1 Putative uncharacterized protein	Null	TRINITY_GG_942_c2_g1_i1
g14962.t1	Null	Null	Null	Null	Null	Null	Null	Null	Null	Null	Null	Null	Null	TRINITY_GG_942_c2_g1_i1
g18104.t1	Null	Null	Null	Null	Null	Null	Null	Null	Null	Null	Null	Null	Null	TRINITY_GG_942_c2_g1_i1
g31253.t1	Null	Null	Null	Null	Null	Null	Null	Null	Null	Null	Null	Null	Null	TRINITY_GG_942_c2_g1_i1
g581.t1	Null	Null	Null	Null	Null	Null	Null	Null	Null	Null	Null	Null	Null	TRINITY_GG_942_c2_g1_i1
g582.t1	Null	Null	Null	Null	Null	Null	Null	Null	Null	Null	Null	Null	Null	TRINITY_GG_942_c2_g1_i1
g6711.t1	Null	Null	Null	Null	Null	Null	Null	Null	Null	Null	Null	Null	Null	TRINITY_GG_942_c2_g1_i1
g9259.t1	(pident:64.706) XP_045495874.1 tektin-B1-like [Colias croceus]	(pident:69.85) tektin-B1-like [Spodoptera litura]	Null	(pident:34.677) Full=Tektin-B1 [Strongylocentrotus purpuratus]	Null	IPR000435(Tektin)	PF03148(Tektin family)	Null	Null	Null	Null	Papo003314.1 Tektin-B1 OS=Strongylocentrotus purpuratus OX=7668 PE=1 SV=1	Null	TRINITY_GG_942_c2_g1_i1
g18711.t1	Null	Null	Null	Null	Null	Null	Null	Null	Null	Null	Null	Null	Null	TRINITY_GG_94_c3_g1_i1
g22154.t1	(pident:45.122) XP_045519588.1 dynein light chain Tctex-type protein 2B-like [Pieris brassicae]	(pident:45.12) dynein light chain Tctex-type protein 2B-like [Pieris brassicae]	Null	Null	Null	IPR038586(Tctex-1-like superfamily),IPR005334(Dynein light chain Tctex-1 like)	PF03645(Tctex-1 family)	Null	Null	Null	Null	Edef010215.1 Tctex1 domain-containing protein 1 OS=Danio rerio OX=7955 GN=tctex1d1 PE=2 SV=1	Null	TRINITY_GG_94_c2_g1_i14
g22153.t1	(pident:45.055) XP_026758196.1 tctex1 domain-containing protein 1-like [Galleria mellonella]	(pident:51.01) unnamed protein product [Arctia plantaginis]	Null	Null	Null	IPR038586(Tctex-1-like superfamily),IPR005334(Dynein light chain Tctex-1 like)	PF03645(Tctex-1 family)	Null	Null	Null	Null	Null	Null	TRINITY_GG_94_c1_g1_i6
g22156.t1	(pident:57.231) XP_014369287.2 fork head domain transcription factor slp2 [Papilio machaon]	(pident:68.44) PREDICTED: fork head domain transcription factor slp2-like [Papilio xuthus]<>Fork head domain transcription factor slp2 [Papilio xuthus]	(pident:63.16) forkhead box transcription factor, partial [Klebsiella pneumoniae]	(pident:52.466) Full=Fork head domain transcription factor slp2; AltName: Full=Sloppy paired locus protein 2 [Drosophila melanogaster]	GO:0003700(DNA-binding transcription factor activity), GO:0006355(regulation of transcription, DNA-templated), GO:0043565(sequence-specific DNA binding)	IPR036390(Winged helix DNA-binding domain superfamily),IPR036388(Winged helix-like DNA-binding domain superfamily),IPR030456(Fork head domain conserved site 2),IPR001766(Fork head domain)	PF00250(Forkhead domain)	Null	7CBY_C Structure of FOXG1 DNA binding domain bound to DBE2 DNA site [Homo sapiens]	A0A559LXH4#PHI:11258#FoSep1#5507#Fusarium_oxysporum#reduced_virulence	Null	Pmac012485.1 Fork head domain transcription factor slp2 OS=Drosophila melanogaster OX=7227 GN=slp2 PE=2 SV=3	Null	TRINITY_GG_94_c0_g3_i5
g26649.t1	(pident:85.232) XP_013187158.1 PREDICTED: fork head domain transcription factor slp2-like [Amyelois transitella]	(pident:81.43) fork head domain transcription factor slp2 [Manduca sexta]	(pident:61.84) forkhead box transcription factor, partial [Klebsiella pneumoniae]	(pident:72.152) Full=Fork head domain transcription factor slp2; AltName: Full=Sloppy paired locus protein 2 [Drosophila melanogaster]	GO:0003700(DNA-binding transcription factor activity), GO:0006355(regulation of transcription, DNA-templated), GO:0043565(sequence-specific DNA binding)	IPR036390(Winged helix DNA-binding domain superfamily),IPR036388(Winged helix-like DNA-binding domain superfamily),IPR030456(Fork head domain conserved site 2),IPR001766(Fork head domain)	PF00250(Forkhead domain)	Null	7CBY_C Structure of FOXG1 DNA binding domain bound to DBE2 DNA site [Homo sapiens]	A0A559LXH4#PHI:11258#FoSep1#5507#Fusarium_oxysporum#reduced_virulence	Null	Hfuc023066.1 Fork head domain transcription factor slp2 OS=Drosophila melanogaster OX=7227 GN=slp2 PE=2 SV=3	Null	TRINITY_GG_94_c0_g3_i5
g22159.t1	(pident:53.696) XP_030033484.2 3-oxoacyl-[acyl-carrier-protein] reductase FabG [Manduca sexta]	(pident:53.70) 3-oxoacyl-[acyl-carrier-protein] reductase FabG [Manduca sexta]	(pident:44.84) glucose 1-dehydrogenase [Thermoanaerobaculum aquaticum]	(pident:35.039) Full=3-oxoacyl-[acyl-carrier-protein] reductase FabG; AltName: Full=3-ketoacyl-acyl carrier protein reductase; AltName: Full=Beta-Ketoacyl-acyl carrier protein reductase; AltName: Full=Beta-ketoacyl-ACP reductase [Vibrio cholerae O1 biovar El Tor str. N16961]	GO:0016491(oxidoreductase activity)	IPR036291(NAD(P)-binding domain superfamily),IPR020904(Short-chain dehydrogenase/reductase, conserved site),IPR002347(Short-chain dehydrogenase/reductase SDR)	PF13561(Enoyl-(Acyl carrier protein) reductase)	Null	Null	Null	Null	Clig017277.1 3-oxoacyl-[acyl-carrier-protein] reductase FabG OS=Thermotoga maritima (strain ATCC 43589 / MSB8 / DSM 3109 / JCM 10099) OX=243274 GN=fabG PE=3 SV=1	Null	TRINITY_GG_94_c0_g1_i10
g22160.t1	(pident:55.926) XP_035433506.1 uncharacterized oxidoreductase MT0954-like [Spodoptera frugiperda]	(pident:55.93) uncharacterized protein LOC111348129 isoform X1 [Spodoptera litura]	(pident:45.78) glucose 1-dehydrogenase [Thermoanaerobaculum aquaticum]	(pident:34.553) Full=3-oxoacyl-[acyl-carrier-protein] reductase FabG; AltName: Full=3-ketoacyl-acyl carrier protein reductase; AltName: Full=Beta-Ketoacyl-acyl carrier protein reductase; AltName: Full=Beta-ketoacyl-ACP reductase [Chlamydia trachomatis D/UW-3/CX]	GO:0016491(oxidoreductase activity)	IPR036291(NAD(P)-binding domain superfamily),IPR020904(Short-chain dehydrogenase/reductase, conserved site),IPR002347(Short-chain dehydrogenase/reductase SDR)	PF13561(Enoyl-(Acyl carrier protein) reductase)	Null	Null	Null	Null	Ahon018618.1 Uncharacterized oxidoreductase TM_0325 OS=Thermotoga maritima (strain ATCC 43589 / MSB8 / DSM 3109 / JCM 10099) OX=243274 GN=TM_0325 PE=3 SV=1	Null	TRINITY_GG_94_c0_g1_i10
g22161.t1	(pident:56.554) CAG9132299.1 unnamed protein product [Plutella xylostella]	(pident:56.55) 3-oxoacyl-[acyl-carrier-protein] reductase FabG-like [Plutella xylostella]<>unnamed protein product [Plutella xylostella]	(pident:48.41) glucose 1-dehydrogenase [Thermoanaerobaculum aquaticum]	(pident:38.189) Full=3-oxoacyl-[acyl-carrier-protein] reductase FabG; AltName: Full=3-ketoacyl-acyl carrier protein reductase; AltName: Full=Beta-Ketoacyl-acyl carrier protein reductase; AltName: Full=Beta-ketoacyl-ACP reductase [Vibrio cholerae O1 biovar El Tor str. N16961]	GO:0016491(oxidoreductase activity)	IPR036291(NAD(P)-binding domain superfamily),IPR020904(Short-chain dehydrogenase/reductase, conserved site),IPR002347(Short-chain dehydrogenase/reductase SDR)	PF13561(Enoyl-(Acyl carrier protein) reductase)	Null	Null	Null	Null	Pxyl015119.1 3-oxoacyl-[acyl-carrier-protein] reductase FabG OS=Thermotoga maritima (strain ATCC 43589 / MSB8 / DSM 3109 / JCM 10099) OX=243274 GN=fabG PE=3 SV=1	Null	TRINITY_GG_94_c0_g1_i10
g30936.t1	(pident:56.929) CAG9132299.1 unnamed protein product [Plutella xylostella]	(pident:56.93) 3-oxoacyl-[acyl-carrier-protein] reductase FabG-like [Plutella xylostella]<>unnamed protein product [Plutella xylostella]	(pident:48.41) glucose 1-dehydrogenase [Thermoanaerobaculum aquaticum]	(pident:38.189) Full=3-oxoacyl-[acyl-carrier-protein] reductase FabG; AltName: Full=3-ketoacyl-acyl carrier protein reductase; AltName: Full=Beta-Ketoacyl-acyl carrier protein reductase; AltName: Full=Beta-ketoacyl-ACP reductase [Vibrio cholerae O1 biovar El Tor str. N16961]	GO:0016491(oxidoreductase activity)	IPR036291(NAD(P)-binding domain superfamily),IPR020904(Short-chain dehydrogenase/reductase, conserved site),IPR002347(Short-chain dehydrogenase/reductase SDR)	PF13561(Enoyl-(Acyl carrier protein) reductase)	protein_Group:_609,_ProteinID:_440,_lgP:_221.28,_Coverage:_50,_#Peptides:_12,_#Unique:_1,_PTM:_Y,_Avg.Mass:_28111	Null	Null	Null	Clig017277.1 3-oxoacyl-[acyl-carrier-protein] reductase FabG OS=Thermotoga maritima (strain ATCC 43589 / MSB8 / DSM 3109 / JCM 10099) OX=243274 GN=fabG PE=3 SV=1	Null	TRINITY_GG_94_c0_g1_i10
g30937.t1	(pident:55.556) XP_035433506.1 uncharacterized oxidoreductase MT0954-like [Spodoptera frugiperda]	(pident:55.56) uncharacterized protein LOC111348129 isoform X1 [Spodoptera litura]	(pident:44.98) glucose 1-dehydrogenase [Thermoanaerobaculum aquaticum]	(pident:34.959) Full=3-oxoacyl-[acyl-carrier-protein] reductase FabG; AltName: Full=3-ketoacyl-acyl carrier protein reductase; AltName: Full=Beta-Ketoacyl-acyl carrier protein reductase; AltName: Full=Beta-ketoacyl-ACP reductase [Chlamydia trachomatis D/UW-3/CX]	GO:0016491(oxidoreductase activity)	IPR036291(NAD(P)-binding domain superfamily),IPR020904(Short-chain dehydrogenase/reductase, conserved site),IPR002347(Short-chain dehydrogenase/reductase SDR)	PF13561(Enoyl-(Acyl carrier protein) reductase)	Null	Null	Null	Null	Ahon018618.1 Uncharacterized oxidoreductase TM_0325 OS=Thermotoga maritima (strain ATCC 43589 / MSB8 / DSM 3109 / JCM 10099) OX=243274 GN=TM_0325 PE=3 SV=1	Null	TRINITY_GG_94_c0_g1_i10
g30938.t1	(pident:55.642) XP_030033484.2 3-oxoacyl-[acyl-carrier-protein] reductase FabG [Manduca sexta]	(pident:55.64) 3-oxoacyl-[acyl-carrier-protein] reductase FabG [Manduca sexta]	(pident:45.63) glucose 1-dehydrogenase [Thermoanaerobaculum aquaticum]	(pident:35.827) Full=3-oxoacyl-[acyl-carrier-protein] reductase FabG; AltName: Full=3-ketoacyl-acyl carrier protein reductase; AltName: Full=Beta-Ketoacyl-acyl carrier protein reductase; AltName: Full=Beta-ketoacyl-ACP reductase [Vibrio cholerae O1 biovar El Tor str. N16961]	GO:0016491(oxidoreductase activity)	IPR036291(NAD(P)-binding domain superfamily),IPR020904(Short-chain dehydrogenase/reductase, conserved site),IPR002347(Short-chain dehydrogenase/reductase SDR)	PF13561(Enoyl-(Acyl carrier protein) reductase)	Null	Null	Null	Null	Msex014327.1 3-oxoacyl-[acyl-carrier-protein] reductase FabG OS=Chlamydia trachomatis (strain D/UW-3/Cx) OX=272561 GN=fabG PE=3 SV=3	Null	TRINITY_GG_94_c0_g1_i10
g7678.t1	(pident:56.929) CAG9132299.1 unnamed protein product [Plutella xylostella]	(pident:56.93) 3-oxoacyl-[acyl-carrier-protein] reductase FabG-like [Plutella xylostella]<>unnamed protein product [Plutella xylostella]	(pident:48.41) glucose 1-dehydrogenase [Thermoanaerobaculum aquaticum]	(pident:38.189) Full=3-oxoacyl-[acyl-carrier-protein] reductase FabG; AltName: Full=3-ketoacyl-acyl carrier protein reductase; AltName: Full=Beta-Ketoacyl-acyl carrier protein reductase; AltName: Full=Beta-ketoacyl-ACP reductase [Vibrio cholerae O1 biovar El Tor str. N16961]	GO:0016491(oxidoreductase activity)	IPR036291(NAD(P)-binding domain superfamily),IPR020904(Short-chain dehydrogenase/reductase, conserved site),IPR002347(Short-chain dehydrogenase/reductase SDR)	PF13561(Enoyl-(Acyl carrier protein) reductase)	protein_Group:_609,_ProteinID:_439,_lgP:_221.28,_Coverage:_50,_#Peptides:_12,_#Unique:_1,_PTM:_Y,_Avg.Mass:_28111	Null	Null	Null	Clig017277.1 3-oxoacyl-[acyl-carrier-protein] reductase FabG OS=Thermotoga maritima (strain ATCC 43589 / MSB8 / DSM 3109 / JCM 10099) OX=243274 GN=fabG PE=3 SV=1	Null	TRINITY_GG_94_c0_g1_i10
g7679.t1	(pident:55.185) XP_035433506.1 uncharacterized oxidoreductase MT0954-like [Spodoptera frugiperda]	(pident:55.56) uncharacterized protein LOC111348129 isoform X1 [Spodoptera litura]	(pident:44.98) glucose 1-dehydrogenase [Thermoanaerobaculum aquaticum]	(pident:34.959) Full=3-oxoacyl-[acyl-carrier-protein] reductase FabG; AltName: Full=3-ketoacyl-acyl carrier protein reductase; AltName: Full=Beta-Ketoacyl-acyl carrier protein reductase; AltName: Full=Beta-ketoacyl-ACP reductase [Chlamydia trachomatis D/UW-3/CX]	GO:0016491(oxidoreductase activity)	IPR036291(NAD(P)-binding domain superfamily),IPR020904(Short-chain dehydrogenase/reductase, conserved site),IPR002347(Short-chain dehydrogenase/reductase SDR)	PF13561(Enoyl-(Acyl carrier protein) reductase)	Null	Null	Null	Null	Ahon018618.1 Uncharacterized oxidoreductase TM_0325 OS=Thermotoga maritima (strain ATCC 43589 / MSB8 / DSM 3109 / JCM 10099) OX=243274 GN=TM_0325 PE=3 SV=1	Null	TRINITY_GG_94_c0_g1_i10
g7680.t1	(pident:55.642) XP_030033484.2 3-oxoacyl-[acyl-carrier-protein] reductase FabG [Manduca sexta]	(pident:55.64) 3-oxoacyl-[acyl-carrier-protein] reductase FabG [Manduca sexta]	(pident:45.63) glucose 1-dehydrogenase [Thermoanaerobaculum aquaticum]	(pident:35.827) Full=3-oxoacyl-[acyl-carrier-protein] reductase FabG; AltName: Full=3-ketoacyl-acyl carrier protein reductase; AltName: Full=Beta-Ketoacyl-acyl carrier protein reductase; AltName: Full=Beta-ketoacyl-ACP reductase [Vibrio cholerae O1 biovar El Tor str. N16961]	GO:0016491(oxidoreductase activity)	IPR036291(NAD(P)-binding domain superfamily),IPR020904(Short-chain dehydrogenase/reductase, conserved site),IPR002347(Short-chain dehydrogenase/reductase SDR)	PF13561(Enoyl-(Acyl carrier protein) reductase)	Null	Null	Null	Null	Msex014327.1 3-oxoacyl-[acyl-carrier-protein] reductase FabG OS=Chlamydia trachomatis (strain D/UW-3/Cx) OX=272561 GN=fabG PE=3 SV=3	Null	TRINITY_GG_94_c0_g1_i10
g3468.t1	(pident:91.393) XP_028175501.1 1-phosphatidylinositol 4,5-bisphosphate phosphodiesterase isoform X2 [Ostrinia furnacalis]	(pident:89.07) 1-phosphatidylinositol 4,5-bisphosphate phosphodiesterase isoform X2 [Ostrinia furnacalis]	Null	(pident:67.300) Full=1-phosphatidylinositol 4,5-bisphosphate phosphodiesterase; AltName: Full=1-phosphatidylinositol 4,5-bisphosphate phosphodiesterase beta; AltName: Full=No receptor potential A protein; AltName: Full=Phosphoinositide phospholipase C; AltName: Full=Phosphoinositide phospholipase C-beta [Drosophila melanogaster]	GO:0004435(phosphatidylinositol phospholipase C activity), GO:0005509(calcium ion binding), GO:0006629(lipid metabolic process), GO:0007165(signal transduction), GO:0008081(phosphoric diester hydrolase activity), GO:0035556(intracellular signal transduction)	IPR042531(Phospholipase C-beta, C-terminal domain superfamily),IPR037862(PLC-beta, PH domain),IPR035892(C2 domain superfamily),IPR017946(PLC-like phosphodiesterase, TIM beta/alpha-barrel domain superfamily),IPR016280(Phosphatidylinositol-4, 5-bisphosphate phosphodiesterase beta),IPR015359(Phosphoinositide-specific phospholipase C, EF-hand-like domain),IPR011992(EF-hand domain pair),IPR009535(Phos…	PF00168(C2 domain), PF00387(Phosphatidylinositol-specific phospholipase C, Y domain), PF00388(Phosphatidylinositol-specific phospholipase C, X domain), PF06631(Protein of unknown function (DUF1154)), PF09279(Phosphoinositide-specific phospholipase C, efhand-like), PF17787(PH domain)	Null	6IRC_A C-terminal domain of Drosophila phospholipase b NORPA, methylated [Drosophila melanogaster]	Null	Null	Ofur011553.1 1-phosphatidylinositol 4,5-bisphosphate phosphodiesterase OS=Drosophila melanogaster OX=7227 GN=norpA PE=1 SV=4	Null	TRINITY_GG_933_c0_g1_i1
g8965.t1	(pident:94.673) XP_028175501.1 1-phosphatidylinositol 4,5-bisphosphate phosphodiesterase isoform X2 [Ostrinia furnacalis]	(pident:77.11) 1-phosphatidylinositol 4,5-bisphosphate phosphodiesterase isoform X2 [Ostrinia furnacalis]	Null	(pident:71.948) Full=1-phosphatidylinositol 4,5-bisphosphate phosphodiesterase; AltName: Full=1-phosphatidylinositol 4,5-bisphosphate phosphodiesterase beta; AltName: Full=No receptor potential A protein; AltName: Full=Phosphoinositide phospholipase C; AltName: Full=Phosphoinositide phospholipase C-beta [Drosophila melanogaster]	GO:0004435(phosphatidylinositol phospholipase C activity), GO:0005509(calcium ion binding), GO:0006629(lipid metabolic process), GO:0007165(signal transduction), GO:0008081(phosphoric diester hydrolase activity), GO:0035556(intracellular signal transduction)	IPR042531(Phospholipase C-beta, C-terminal domain superfamily),IPR037862(PLC-beta, PH domain),IPR035892(C2 domain superfamily),IPR017946(PLC-like phosphodiesterase, TIM beta/alpha-barrel domain superfamily),IPR016280(Phosphatidylinositol-4, 5-bisphosphate phosphodiesterase beta),IPR015359(Phosphoinositide-specific phospholipase C, EF-hand-like domain),IPR011992(EF-hand domain pair),IPR001711(Phos…	PF00168(C2 domain), PF00387(Phosphatidylinositol-specific phospholipase C, Y domain), PF00388(Phosphatidylinositol-specific phospholipase C, X domain), PF09279(Phosphoinositide-specific phospholipase C, efhand-like), PF17787(PH domain)	Null	Null	Null	Null	Ofur011553.1 1-phosphatidylinositol 4,5-bisphosphate phosphodiesterase OS=Drosophila melanogaster OX=7227 GN=norpA PE=1 SV=4	Null	TRINITY_GG_933_c0_g1_i1
g8965.t2	(pident:94.915) XP_028175500.1 1-phosphatidylinositol 4,5-bisphosphate phosphodiesterase isoform X1 [Ostrinia furnacalis]	(pident:77.28) 1-phosphatidylinositol 4,5-bisphosphate phosphodiesterase isoform X1 [Ostrinia furnacalis]	Null	(pident:72.300) Full=1-phosphatidylinositol 4,5-bisphosphate phosphodiesterase; AltName: Full=1-phosphatidylinositol 4,5-bisphosphate phosphodiesterase beta; AltName: Full=No receptor potential A protein; AltName: Full=Phosphoinositide phospholipase C; AltName: Full=Phosphoinositide phospholipase C-beta [Drosophila melanogaster]	GO:0004435(phosphatidylinositol phospholipase C activity), GO:0005509(calcium ion binding), GO:0006629(lipid metabolic process), GO:0007165(signal transduction), GO:0008081(phosphoric diester hydrolase activity), GO:0035556(intracellular signal transduction)	IPR042531(Phospholipase C-beta, C-terminal domain superfamily),IPR037862(PLC-beta, PH domain),IPR035892(C2 domain superfamily),IPR017946(PLC-like phosphodiesterase, TIM beta/alpha-barrel domain superfamily),IPR016280(Phosphatidylinositol-4, 5-bisphosphate phosphodiesterase beta),IPR015359(Phosphoinositide-specific phospholipase C, EF-hand-like domain),IPR011992(EF-hand domain pair),IPR001711(Phos…	PF00168(C2 domain), PF00387(Phosphatidylinositol-specific phospholipase C, Y domain), PF00388(Phosphatidylinositol-specific phospholipase C, X domain), PF09279(Phosphoinositide-specific phospholipase C, efhand-like), PF17787(PH domain)	Null	Null	Null	Null	Onub010001.1 1-phosphatidylinositol 4,5-bisphosphate phosphodiesterase OS=Drosophila melanogaster OX=7227 GN=norpA PE=1 SV=4	Null	TRINITY_GG_933_c0_g1_i1
g8965.t3	(pident:93.001) XP_028175500.1 1-phosphatidylinositol 4,5-bisphosphate phosphodiesterase isoform X1 [Ostrinia furnacalis]	(pident:75.80) 1-phosphatidylinositol 4,5-bisphosphate phosphodiesterase isoform X1 [Ostrinia furnacalis]	Null	(pident:70.886) Full=1-phosphatidylinositol 4,5-bisphosphate phosphodiesterase; AltName: Full=1-phosphatidylinositol 4,5-bisphosphate phosphodiesterase beta; AltName: Full=No receptor potential A protein; AltName: Full=Phosphoinositide phospholipase C; AltName: Full=Phosphoinositide phospholipase C-beta [Drosophila melanogaster]	GO:0004435(phosphatidylinositol phospholipase C activity), GO:0005509(calcium ion binding), GO:0006629(lipid metabolic process), GO:0007165(signal transduction), GO:0008081(phosphoric diester hydrolase activity), GO:0035556(intracellular signal transduction)	IPR042531(Phospholipase C-beta, C-terminal domain superfamily),IPR037862(PLC-beta, PH domain),IPR035892(C2 domain superfamily),IPR017946(PLC-like phosphodiesterase, TIM beta/alpha-barrel domain superfamily),IPR016280(Phosphatidylinositol-4, 5-bisphosphate phosphodiesterase beta),IPR015359(Phosphoinositide-specific phospholipase C, EF-hand-like domain),IPR011992(EF-hand domain pair),IPR001711(Phos…	PF00168(C2 domain), PF00387(Phosphatidylinositol-specific phospholipase C, Y domain), PF00388(Phosphatidylinositol-specific phospholipase C, X domain), PF09279(Phosphoinositide-specific phospholipase C, efhand-like), PF17787(PH domain)	Null	Null	Null	Null	Ofur011553.1 1-phosphatidylinositol 4,5-bisphosphate phosphodiesterase OS=Drosophila melanogaster OX=7227 GN=norpA PE=1 SV=4	Null	TRINITY_GG_933_c0_g1_i1
g8966.t1	(pident:47.808) CAG9135537.1 unnamed protein product [Plutella xylostella]	(pident:44.17) zinc finger protein 100-like [Ostrinia furnacalis]	Null	(pident:27.511) Full=Zinc finger protein 84; AltName: Full=Zinc finger protein HPF2 [Homo sapiens]	Null	IPR036236(Zinc finger C2H2 superfamily),IPR013087(Zinc finger C2H2-type)	PF00096(Zinc finger, C2H2 type)	Null	Null	Null	Null	Hfuc025815.1 Putative uncharacterized protein	Null	TRINITY_GG_930_c4_g1_i1
g8966.t2	(pident:37.083) CAG9135537.1 unnamed protein product [Plutella xylostella]	(pident:37.08) hypothetical protein JYU34_013859 [Plutella xylostella]	Null	Null	Null	Null	Null	Null	Null	Null	Null	Null	Null	TRINITY_GG_930_c4_g1_i1
g8970.t1	(pident:55.912) CAG9135527.1 unnamed protein product [Plutella xylostella]	(pident:55.69) uncharacterized protein LOC119692658 [Plutella xylostella]<>unnamed protein product [Plutella xylostella]	Null	(pident:37.815) Full=HMG box transcription factor BBX; AltName: Full=Bobby sox homolog; AltName: Full=HMG box-containing protein 2 [Homo sapiens]	Null	IPR036910(High mobility group box domain superfamily)	Null	Null	Null	Null	Null	Pxyl024014.1 HMG box transcription factor BBX OS=Mus musculus OX=10090 GN=Bbx PE=1 SV=2	Null	TRINITY_GG_930_c2_g1_i5
g10994.t1	(pident:69.022) XP_013198234.1 PREDICTED: uncharacterized protein LOC106141127 [Amyelois transitella]	(pident:69.02) PREDICTED: uncharacterized protein LOC106141127 [Amyelois transitella]	(pident:51.79) hypothetical protein, partial [Acinetobacter baumannii]	Null	Null	Null	Null	Null	Null	Null	Null	Ccra009556.1 Putative uncharacterized protein	Null	TRINITY_GG_930_c16_g1_i1
g11493.t1	(pident:69.565) XP_013198234.1 PREDICTED: uncharacterized protein LOC106141127 [Amyelois transitella]	(pident:69.57) PREDICTED: uncharacterized protein LOC106141127 [Amyelois transitella]	(pident:51.79) hypothetical protein, partial [Acinetobacter baumannii]	Null	Null	Null	Null	Null	Null	Null	Null	Ccra009556.1 Putative uncharacterized protein	Null	TRINITY_GG_930_c16_g1_i1
g1471.t1	(pident:66.667) XP_013198234.1 PREDICTED: uncharacterized protein LOC106141127 [Amyelois transitella]	(pident:67.03) PREDICTED: uncharacterized protein LOC106141127 [Amyelois transitella]	(pident:49.11) hypothetical protein, partial [Acinetobacter baumannii]	Null	Null	IPR004941(Baculovirus FP protein)	PF03258(Baculovirus FP protein)	Null	Null	Null	Null	Ccra009556.1 Putative uncharacterized protein	Null	TRINITY_GG_930_c16_g1_i1
g15408.t1	(pident:68.947) XP_013198234.1 PREDICTED: uncharacterized protein LOC106141127 [Amyelois transitella]	(pident:68.95) PREDICTED: uncharacterized protein LOC106141127 [Amyelois transitella]	(pident:51.79) hypothetical protein, partial [Acinetobacter baumannii]	(pident:47.959) Full=Retrovirus-related Pol polyprotein from transposon 17.6; Includes: Full=Protease; Includes: Full=Reverse transcriptase; Includes: Full=Endonuclease [Drosophila melanogaster]	Null	IPR043502(DNA/RNA polymerase superfamily),IPR031959(Protein of unknown function DUF4779)	PF16009(Domain of unknown function (DUF4779))	Null	Null	Null	Null	Ccra009556.1 Putative uncharacterized protein	Null	TRINITY_GG_930_c16_g1_i1
g19789.t1	(pident:41.401) XP_023947149.1 uncharacterized protein LOC112052340 [Bicyclus anynana]	(pident:38.06) uncharacterized protein LOC113232014 [Hyposmocoma kahamanoa]	Null	Null	Null	Null	Null	protein_Group:_2085,_ProteinID:_2012,_lgP:_33.31,_Coverage:_4,_#Peptides:_2,_#Unique:_2,_PTM:_Y,_Avg.Mass:_49427	Null	Null	Null	Pxyl026903.1 Probable RNA-directed DNA polymerase from transposon X-element OS=Drosophila melanogaster OX=7227 GN=X-element\ORF2 PE=3 SV=1	Null	TRINITY_GG_930_c16_g1_i1
g21496.t1	(pident:70.976) RVE53873.1 hypothetical protein evm_001535 [Chilo suppressalis]	(pident:82.58) hypothetical protein evm_001535 [Chilo suppressalis]	(pident:51.79) hypothetical protein, partial [Acinetobacter baumannii]	(pident:55.132) Full=Sodium/calcium exchanger 1; AltName: Full=Na(+)/Ca(2+)-exchange protein 1; AltName: Full=Solute carrier family 8 member 1; Flags: Precursor [Mus musculus]	GO:0005432(calcium:sodium antiporter activity), GO:0006816(calcium ion transport), GO:0016020(membrane), GO:0016021(integral component of membrane), GO:0055085(transmembrane transport)	IPR044880(NCX, central ion-binding domain superfamily),IPR038081(CalX-like domain superfamily),IPR004837(Sodium/calcium exchanger membrane region),IPR004836(Sodium/calcium exchanger protein)	PF01699(Sodium/calcium exchanger protein)	Null	3RB5_A Crystal structure of calcium binding domain CBD12 of CALX1.1 [Drosophila melanogaster] /3RB5_B Crystal structure of calcium binding domain CBD12 of CALX1.1 [Drosophila melanogaster]	Null	Null	Cexi032180.1 locus=fragScaff_scaffold_232:382826:436359:- [translate_table: standard]	Null	TRINITY_GG_930_c16_g1_i1
g21519.t1	(pident:53.801) CAB3227417.1 unnamed protein product [Arctia plantaginis]	(pident:55.26) hypothetical protein B5X24_HaOG214647 [Helicoverpa armigera]	(pident:37.10) endonuclease/exonuclease/phosphatase family protein, partial [Carnobacterium maltaromaticum]	Null	Null	IPR000477(Reverse transcriptase domain)	PF00078(Reverse transcriptase (RNA-dependent DNA polymerase))	Null	Null	Null	Null	Ccur019003.1 Probable RNA-directed DNA polymerase from transposon BS OS=Drosophila melanogaster OX=7227 GN=RTase PE=2 SV=1	Null	TRINITY_GG_930_c16_g1_i1
g22456.t1	(pident:68.947) XP_013198234.1 PREDICTED: uncharacterized protein LOC106141127 [Amyelois transitella]	(pident:68.95) PREDICTED: uncharacterized protein LOC106141127 [Amyelois transitella]	(pident:51.79) hypothetical protein, partial [Acinetobacter baumannii]	(pident:47.368) Full=Retrovirus-related Pol polyprotein from transposon 17.6; Includes: Full=Protease; Includes: Full=Reverse transcriptase; Includes: Full=Endonuclease [Drosophila melanogaster]	Null	IPR043502(DNA/RNA polymerase superfamily)	Null	Null	Null	Null	Null	Ccra009556.1 Putative uncharacterized protein	Null	TRINITY_GG_930_c16_g1_i1
g26721.t1	(pident:67.935) XP_013198234.1 PREDICTED: uncharacterized protein LOC106141127 [Amyelois transitella]	(pident:67.93) PREDICTED: uncharacterized protein LOC106141127 [Amyelois transitella]	(pident:70.42) reverse transcriptase family protein, partial [Pseudomonas aeruginosa]	(pident:34.595) Full=Dynein axonemal heavy chain 3; AltName: Full=Axonemal beta dynein heavy chain 3; AltName: Full=Ciliary dynein heavy chain 3 [Mus musculus]	Null	IPR043502(DNA/RNA polymerase superfamily),IPR041466(Dynein heavy chain, AAA 5 extension domain)	PF17852(Dynein heavy chain AAA lid domain)	Null	Null	Null	Null	Ccra009556.1 Putative uncharacterized protein	Null	TRINITY_GG_930_c16_g1_i1
g29766.t1	(pident:68.478) XP_013198234.1 PREDICTED: uncharacterized protein LOC106141127 [Amyelois transitella]	(pident:68.48) PREDICTED: uncharacterized protein LOC106141127 [Amyelois transitella]	(pident:63.37) reverse transcriptase family protein, partial [Pseudomonas aeruginosa]	(pident:48.031) Full=Retrovirus-related Pol polyprotein from transposon 17.6; Includes: Full=Protease; Includes: Full=Reverse transcriptase; Includes: Full=Endonuclease [Drosophila melanogaster]	Null	IPR043502(DNA/RNA polymerase superfamily)	Null	Null	Null	Null	Null	Ccra009556.1 Putative uncharacterized protein	Null	TRINITY_GG_930_c16_g1_i1
g35255.t1	(pident:69.474) XP_013198234.1 PREDICTED: uncharacterized protein LOC106141127 [Amyelois transitella]	(pident:69.47) PREDICTED: uncharacterized protein LOC106141127 [Amyelois transitella]	(pident:71.95) reverse transcriptase family protein, partial [Pseudomonas aeruginosa]	(pident:50.000) Full=Retrovirus-related Pol polyprotein from transposon 17.6; Includes: Full=Protease; Includes: Full=Reverse transcriptase; Includes: Full=Endonuclease [Drosophila melanogaster]	Null	IPR043502(DNA/RNA polymerase superfamily)	Null	Null	Null	Null	Null	Ccra009556.1 Putative uncharacterized protein	Null	TRINITY_GG_930_c16_g1_i1
g5598.t1	(pident:79.654) XP_028168807.1 nucleolysin TIA-1 isoform X1 [Ostrinia furnacalis]	(pident:78.70) LOW QUALITY PROTEIN: nucleolysin TIA-1 [Manduca sexta]	(pident:51.79) hypothetical protein, partial [Acinetobacter baumannii]	(pident:57.025) Full=Nucleolysin TIA-1; AltName: Full=RNA-binding protein TIA-1; AltName: Full=T-cell-restricted intracellular antigen-1; Short=TIA-1 [Mus musculus]	GO:0003676(nucleic acid binding), GO:0003723(RNA binding)	IPR035979(RNA-binding domain superfamily),IPR012677(Nucleotide-binding alpha-beta plait domain superfamily),IPR003954(RNA recognition motif domain, eukaryote),IPR000504(RNA recognition motif domain)	PF00076(RNA recognition motif. (a.k.a. RRM, RBD, or RNP domain))	Null	1X4G_A Chain A, Nucleolysin TIAR [Homo sapiens]	Null	Null	Hcom009054.1 Nucleolysin TIA-1 OS=Mus musculus OX=10090 GN=Tia1 PE=1 SV=1	Null	TRINITY_GG_930_c16_g1_i1
g5652.t1	(pident:42.616) XP_022125617.2 membrane alanyl aminopeptidase [Pieris rapae]	(pident:42.62) membrane alanyl aminopeptidase [Pieris rapae]	(pident:31.58) ERAP1-like C-terminal domain-containing protein, partial [Listeria monocytogenes]	(pident:32.568) Full=Membrane alanyl aminopeptidase; AltName: Full=Aminopeptidase N-like protein; AltName: Full=CryIA(C) receptor; Flags: Precursor [Manduca sexta]	GO:0008237(metallopeptidase activity), GO:0008270(zinc ion binding)	IPR043502(DNA/RNA polymerase superfamily),IPR027268(Peptidase M4/M1, CTD superfamily),IPR024571(ERAP1-like C-terminal domain),IPR014782(Peptidase M1, membrane alanine aminopeptidase)	PF01433(Peptidase family M1 domain), PF11838(ERAP1-like C-terminal domain)	Null	Null	Null	Null	Null	Null	TRINITY_GG_930_c16_g1_i1
g5652.t2	(pident:42.616) XP_022125617.2 membrane alanyl aminopeptidase [Pieris rapae]	(pident:42.62) membrane alanyl aminopeptidase [Pieris rapae]	(pident:31.58) ERAP1-like C-terminal domain-containing protein, partial [Listeria monocytogenes]	(pident:32.563) Full=Membrane alanyl aminopeptidase; AltName: Full=Aminopeptidase N-like protein; AltName: Full=CryIA(C) receptor; Flags: Precursor [Manduca sexta]	GO:0008237(metallopeptidase activity), GO:0008270(zinc ion binding)	IPR043502(DNA/RNA polymerase superfamily),IPR027268(Peptidase M4/M1, CTD superfamily),IPR024571(ERAP1-like C-terminal domain),IPR014782(Peptidase M1, membrane alanine aminopeptidase)	PF01433(Peptidase family M1 domain), PF11838(ERAP1-like C-terminal domain)	Null	Null	Null	Null	Null	Null	TRINITY_GG_930_c16_g1_i1
g6647.t1	(pident:67.788) XP_030034996.2 protein arginine methyltransferase NDUFAF7 homolog, mitochondrial [Manduca sexta]	(pident:67.79) hypothetical protein O3G_MSEX012652 [Manduca sexta]	(pident:72.29) reverse transcriptase family protein, partial [Pseudomonas aeruginosa]	(pident:43.128) Full=Protein arginine methyltransferase NDUFAF7 homolog, mitochondrial; AltName: Full=NADH dehydrogenase [ubiquinone] complex I, assembly factor 7 homolog; AltName: Full=Protein midA homolog [Drosophila melanogaster]	Null	IPR043502(DNA/RNA polymerase superfamily),IPR038375(Protein arginine methyltransferase NDUFAF7 superfamily),IPR029063(S-adenosyl-L-methionine-dependent methyltransferase),IPR003788(Protein arginine methyltransferase NDUFAF7)	PF02636(Putative S-adenosyl-L-methionine-dependent methyltransferase)	Null	Null	Null	Null	Hzea011216.1 Retrovirus-related Pol polyprotein from transposon 412 OS=Drosophila melanogaster OX=7227 GN=POL PE=4 SV=1	Null	TRINITY_GG_930_c16_g1_i1
g35975.t1	(pident:63.363) XP_037976129.1 phospholipid-transporting ATPase ABCA1-like [Plutella xylostella]	(pident:61.36) ATP-binding cassette sub-family A member 1 [Eumeta japonica]	(pident:68.42) hypothetical protein, partial [Pseudomonas aeruginosa]	(pident:32.676) Full=ATP-binding cassette sub-family A member 7 [Mus musculus]	GO:0005524(ATP binding), GO:0016021(integral component of membrane), GO:0016887(ATPase activity), GO:0055085(transmembrane transport), GO:0140359(ABC-type transporter activity Gene Ontology Term)	IPR043502(DNA/RNA polymerase superfamily),IPR041373(Reverse transcriptase, RNase H-like domain),IPR027417(P-loop containing nucleoside triphosphate hydrolase),IPR026082(ABC transporter A),IPR003959(ATPase, AAA-type, core),IPR003439(ABC transporter-like, ATP-binding domain)	PF13304(AAA domain, putative AbiEii toxin, Type IV TA system), PF17917(RNase H-like domain found in reverse transcriptase)	Null	Null	Null	Null	Ahon011474.1 Phospholipid-transporting ATPase ABCA1 OS=Mus musculus OX=10090 GN=Abca1 PE=1 SV=4	Null	TRINITY_GG_930_c12_g1_i1
g8967.t1	(pident:62.551) XP_021194956.1 anaphase-promoting complex subunit 1 [Helicoverpa armigera]	(pident:62.26) anaphase-promoting complex subunit 1-like [Spodoptera frugiperda]	Null	(pident:29.127) Full=Anaphase-promoting complex subunit 1; Short=APC1; AltName: Full=Cyclosome subunit 1; AltName: Full=Mitotic checkpoint regulator; AltName: Full=Testis-specific gene 24 protein [Homo sapiens]	GO:0005680(anaphase-promoting complex)	IPR024990(Anaphase-promoting complex subunit 1)	PF12859(Anaphase-promoting complex subunit 1)	Null	Null	Null	Null	Jcoe003494.1 Anaphase-promoting complex subunit 1 OS=Homo sapiens OX=9606 GN=ANAPC1 PE=1 SV=1	Null	TRINITY_GG_930_c1_g1_i2
g8969.t1	(pident:62.930) XP_028156340.1 anaphase-promoting complex subunit 1 isoform X1 [Ostrinia furnacalis]	(pident:64.59) hypothetical protein evm_007155 [Chilo suppressalis]	(pident:68.82) hypothetical protein, partial [Pseudomonas aeruginosa]	(pident:38.057) Full=Anaphase-promoting complex subunit 1; Short=APC1; AltName: Full=Cyclosome subunit 1; AltName: Full=Mitotic checkpoint regulator; AltName: Full=Testis-specific gene 24 protein [Homo sapiens]	GO:0005680(anaphase-promoting complex)	IPR043502(DNA/RNA polymerase superfamily),IPR041373(Reverse transcriptase, RNase H-like domain),IPR041221(Anaphase-promoting complex subunit 1, C-terminal),IPR024990(Anaphase-promoting complex subunit 1),IPR011989(Armadillo-like helical),IPR002015(Proteasome/cyclosome repeat)	PF01851(Proteasome/cyclosome repeat), PF17917(RNase H-like domain found in reverse transcriptase), PF18122(Anaphase-promoting complex sub unit 1 C-terminal domain)	Null	Null	Null	Null	Sinc010888.1 Anaphase-promoting complex subunit 1 OS=Homo sapiens OX=9606 GN=ANAPC1 PE=1 SV=1	Null	TRINITY_GG_930_c0_g1_i1
g3426.t1	Null	Null	Null	Null	Null	Null	Null	Null	Null	Null	Null	Null	Null	TRINITY_GG_929_c0_g1_i7
g3446.t1	Null	Null	Null	Null	Null	Null	Null	Null	Null	Null	Null	Null	Null	TRINITY_GG_929_c0_g1_i7
g3416.t1	Null	Null	Null	Null	Null	Null	Null	Null	Null	Null	Null	Null	Null	TRINITY_GG_929_c0_g1_i3
g3417.t1	Null	Null	Null	Null	Null	Null	Null	Null	Null	Null	Null	Null	Null	TRINITY_GG_929_c0_g1_i3
g3420.t1	Null	Null	Null	Null	Null	Null	Null	Null	Null	Null	Null	Null	Null	TRINITY_GG_929_c0_g1_i3
g3422.t1	Null	Null	Null	Null	Null	Null	Null	Null	Null	Null	Null	Null	Null	TRINITY_GG_929_c0_g1_i3
g3425.t1	Null	Null	Null	Null	Null	Null	Null	Null	Null	Null	Null	Null	Null	TRINITY_GG_929_c0_g1_i3
g3429.t1	Null	Null	Null	Null	Null	Null	Null	Null	Null	Null	Null	Null	Null	TRINITY_GG_929_c0_g1_i3
g3435.t1	Null	Null	Null	Null	Null	Null	Null	Null	Null	Null	Null	Null	Null	TRINITY_GG_929_c0_g1_i3
g3442.t1	Null	Null	Null	Null	Null	Null	Null	Null	Null	Null	Null	Null	Null	TRINITY_GG_929_c0_g1_i3
g3445.t1	Null	Null	Null	Null	Null	Null	Null	Null	Null	Null	Null	Null	Null	TRINITY_GG_929_c0_g1_i3
g3449.t1	Null	Null	Null	Null	Null	Null	Null	Null	Null	Null	Null	Null	Null	TRINITY_GG_929_c0_g1_i3
g3454.t1	Null	Null	Null	Null	Null	Null	Null	Null	Null	Null	Null	Null	Null	TRINITY_GG_929_c0_g1_i3
g3456.t1	Null	Null	Null	Null	Null	Null	Null	Null	Null	Null	Null	Null	Null	TRINITY_GG_929_c0_g1_i3
g3467.t1	Null	Null	Null	Null	Null	Null	Null	Null	Null	Null	Null	Null	Null	TRINITY_GG_929_c0_g1_i3
g8951.t1	Null	Null	Null	Null	Null	Null	Null	Null	Null	Null	Null	Null	Null	TRINITY_GG_929_c0_g1_i3
g8955.t1	Null	Null	Null	Null	Null	Null	Null	Null	Null	Null	Null	Null	Null	TRINITY_GG_929_c0_g1_i3
g8964.t1	Null	Null	Null	Null	Null	Null	Null	Null	Null	Null	Null	Null	Null	TRINITY_GG_929_c0_g1_i3
g24312.t1	(pident:84.807) XP_028027456.1 limbic system-associated membrane protein-like [Bombyx mandarina]	(pident:85.47) limbic system-associated membrane protein [Manduca sexta]<>hypothetical protein O3G_MSEX004252 [Manduca sexta]<>hypothetical protein O3G_MSEX004252 [Manduca sexta]<>hypothetical protein O3G_MSEX004252 [Manduca sexta]	Null	(pident:29.474) Full=Lachesin; Flags: Precursor [Drosophila melanogaster]	Null	IPR036179(Immunoglobulin-like domain superfamily),IPR013783(Immunoglobulin-like fold),IPR013151(Immunoglobulin),IPR013106(Immunoglobulin V-set domain),IPR013098(Immunoglobulin I-set),IPR007110(Immunoglobulin-like domain),IPR003599(Immunoglobulin subtype),IPR003598(Immunoglobulin subtype 2)	PF00047(Immunoglobulin domain), PF07679(Immunoglobulin I-set domain), PF13927(Immunoglobulin domain)	Null	6NRR_B Crystal structure of Dpr11 IG1 bound to DIP-gamma IG+IG2 [Drosophila melanogaster] /6NS1_A Crystal structure of DIP-gamma IG1+IG2 [Drosophila melanogaster]	Null	Null	Msex011738.1 Lachesin OS=Drosophila melanogaster OX=7227 GN=Lac PE=1 SV=2	Null	TRINITY_GG_923_c0_g1_i1
g22249.t1	(pident:90.504) CAG9087117.1 unnamed protein product [Plutella xylostella]	(pident:89.36) contactin-associated protein like 5-1 isoform X1 [Zerene cesonia]	Null	(pident:24.190) Full=Neurexin-4; AltName: Full=Neurexin IV; Flags: Precursor [Drosophila melanogaster]	Null	IPR013320(Concanavalin A-like lectin/glucanase domain superfamily),IPR001791(Laminin G domain),IPR000152(EGF-type aspartate/asparagine hydroxylation site)	PF02210(Laminin G domain)	Null	Null	Null	Null	Efla004142.1 Contactin-associated protein-like 2 OS=Mus musculus OX=10090 GN=Cntnap2 PE=1 SV=2	Null	TRINITY_GG_921_c0_g1_i1
g33363.t1	(pident:86.686) RVE50628.1 hypothetical protein evm_004752 [Chilo suppressalis]	(pident:86.80) hypothetical protein evm_004752 [Chilo suppressalis]	Null	(pident:25.684) Full=Neurexin-4; AltName: Full=Neurexin IV; Flags: Precursor [Drosophila melanogaster]	GO:0005509(calcium ion binding)	IPR013320(Concanavalin A-like lectin/glucanase domain superfamily),IPR001881(EGF-like calcium-binding domain),IPR001791(Laminin G domain),IPR000742(EGF-like domain),IPR000152(EGF-type aspartate/asparagine hydroxylation site)	PF00008(EGF-like domain), PF02210(Laminin G domain)	Null	Null	Null	Null	Kina001126.1 Contactin-associated protein-like 5 OS=Canis lupus familiaris OX=9615 GN=CNTNAP5 PE=2 SV=1	Null	TRINITY_GG_921_c0_g1_i1
g22253.t1	(pident:42.843) XP_037972626.1 LOW QUALITY PROTEIN: collagen alpha-1(XV) chain-like [Plutella xylostella]	(pident:55.99) desaturase 10 [Streltzoviella insularis]	(pident:33.57) hypothetical protein [Lysinibacillus fusiformis]	(pident:30.960) Full=Collagen alpha-1(XVIII) chain; Contains: Full=Endostatin; Contains: Full=Non-collagenous domain 1; Short=NC1; Flags: Precursor [Homo sapiens]	Null	IPR045463(Collagen type XV/XVIII, trimerization domain),IPR016187(C-type lectin fold),IPR016186(C-type lectin-like/link domain superfamily),IPR013320(Concanavalin A-like lectin/glucanase domain superfamily),IPR010515(Collagenase NC10/endostatin),IPR008160(Collagen triple helix repeat)	PF01391(Collagen triple helix repeat (20 copies)), PF06482(Collagenase NC10 and Endostatin), PF20010(Collagen trimerization domain)	Null	Null	Null	Null	Null	Null	TRINITY_GG_920_c1_g1_i4
g22253.t2	(pident:43.054) XP_037972626.1 LOW QUALITY PROTEIN: collagen alpha-1(XV) chain-like [Plutella xylostella]	(pident:55.99) desaturase 10 [Streltzoviella insularis]	(pident:33.57) hypothetical protein [Lysinibacillus fusiformis]	(pident:30.960) Full=Collagen alpha-1(XVIII) chain; Contains: Full=Endostatin; Contains: Full=Non-collagenous domain 1; Short=NC1; Flags: Precursor [Homo sapiens]	Null	IPR045463(Collagen type XV/XVIII, trimerization domain),IPR016187(C-type lectin fold),IPR016186(C-type lectin-like/link domain superfamily),IPR013320(Concanavalin A-like lectin/glucanase domain superfamily),IPR010515(Collagenase NC10/endostatin),IPR008160(Collagen triple helix repeat)	PF01391(Collagen triple helix repeat (20 copies)), PF06482(Collagenase NC10 and Endostatin), PF20010(Collagen trimerization domain)	Null	Null	Null	Null	Null	Null	TRINITY_GG_920_c1_g1_i4
g22253.t3	(pident:42.956) XP_037972626.1 LOW QUALITY PROTEIN: collagen alpha-1(XV) chain-like [Plutella xylostella]	(pident:55.99) desaturase 10 [Streltzoviella insularis]	(pident:33.57) hypothetical protein [Lysinibacillus fusiformis]	(pident:30.960) Full=Collagen alpha-1(XVIII) chain; Contains: Full=Endostatin; Contains: Full=Non-collagenous domain 1; Short=NC1; Flags: Precursor [Homo sapiens]	Null	IPR045463(Collagen type XV/XVIII, trimerization domain),IPR016187(C-type lectin fold),IPR016186(C-type lectin-like/link domain superfamily),IPR013320(Concanavalin A-like lectin/glucanase domain superfamily),IPR010515(Collagenase NC10/endostatin),IPR008160(Collagen triple helix repeat)	PF01391(Collagen triple helix repeat (20 copies)), PF06482(Collagenase NC10 and Endostatin), PF20010(Collagen trimerization domain)	Null	Null	Null	Null	Null	Null	TRINITY_GG_920_c1_g1_i4
g22252.t1	(pident:70.664) XP_037976007.1 uncharacterized protein LOC105387211 [Plutella xylostella]	(pident:69.64) uncharacterized protein LOC105387211 [Plutella xylostella]<>uncharacterized protein LOC105387211 [Plutella xylostella]	Null	(pident:28.571) Full=Intersectin-2; AltName: Full=SH3 domain-containing protein 1B; AltName: Full=SH3P18; AltName: Full=SH3P18-like WASP-associated protein [Homo sapiens]	GO:0005085(guanyl-nucleotide exchange factor activity)	IPR035899(Dbl homology (DH) domain superfamily),IPR001849(Pleckstrin homology domain),IPR000219(Dbl homology (DH) domain)	PF00621(RhoGEF domain)	Null	Null	Null	Null	Sinc007970.1 Intersectin-2 OS=Homo sapiens OX=9606 GN=ITSN2 PE=1 SV=3	Null	TRINITY_GG_920_c0_g1_i1
g36507.t1	(pident:59.331) XP_026333742.1 isoleucine--tRNA ligase, mitochondrial [Hyposmocoma kahamanoa]	(pident:54.28) isoleucine--tRNA ligase, mitochondrial-like [Spodoptera frugiperda]	(pident:37.65) isoleucine--tRNA ligase [Crinalium epipsammum]	(pident:46.479) Full=Isoleucine--tRNA ligase, mitochondrial; AltName: Full=Isoleucyl-tRNA synthetase; Short=IleRS; Flags: Precursor [Macaca fascicularis]	GO:0000166(nucleotide binding), GO:0002161(aminoacyl-tRNA editing activity), GO:0004812(aminoacyl-tRNA ligase activity), GO:0004822(isoleucine-tRNA ligase activity), GO:0005524(ATP binding), GO:0006418(tRNA aminoacylation for protein translation), GO:0006428(isoleucyl-tRNA aminoacylation)	IPR014729(Rossmann-like alpha/beta/alpha sandwich fold),IPR009008(Valyl/Leucyl/Isoleucyl-tRNA synthetase, editing domain),IPR002301(Isoleucine-tRNA ligase),IPR002300(Aminoacyl-tRNA synthetase, class Ia),IPR001412(Aminoacyl-tRNA synthetase, class I, conserved site)	PF00133(tRNA synthetases class I (I, L, M and V))	Null	Null	Null	Null	Atri010785.1 Isoleucine--tRNA ligase, mitochondrial (Fragment) OS=Macaca fascicularis OX=9541 GN=IARS2 PE=2 SV=2	Null	TRINITY_GG_918_c27_g1_i1
g5773.t1	(pident:65.991) XP_035452355.1 isoleucine--tRNA ligase, mitochondrial-like [Spodoptera frugiperda]	(pident:66.57) hypothetical protein B5V51_10484 [Heliothis virescens]	(pident:43.73) isoleucine--tRNA ligase [Limnospira indica]	(pident:44.571) Full=Isoleucine--tRNA ligase, mitochondrial; AltName: Full=Isoleucyl-tRNA synthetase; Short=IleRS; Flags: Precursor [Homo sapiens]	GO:0000166(nucleotide binding), GO:0002161(aminoacyl-tRNA editing activity), GO:0004812(aminoacyl-tRNA ligase activity), GO:0004822(isoleucine-tRNA ligase activity), GO:0005524(ATP binding), GO:0006418(tRNA aminoacylation for protein translation), GO:0006428(isoleucyl-tRNA aminoacylation)	IPR014729(Rossmann-like alpha/beta/alpha sandwich fold),IPR009008(Valyl/Leucyl/Isoleucyl-tRNA synthetase, editing domain),IPR002301(Isoleucine-tRNA ligase),IPR002300(Aminoacyl-tRNA synthetase, class Ia),IPR001412(Aminoacyl-tRNA synthetase, class I, conserved site)	PF00133(tRNA synthetases class I (I, L, M and V))	Null	Null	Null	Null	Lfle020257.1 Isoleucine--tRNA ligase, mitochondrial (Fragment) OS=Macaca fascicularis OX=9541 GN=IARS2 PE=2 SV=2	Null	TRINITY_GG_918_c27_g1_i1
g5766.t1	(pident:89.831) CAG9131147.1 unnamed protein product [Plutella xylostella]	(pident:89.83) histone-arginine methyltransferase CARMER [Plutella xylostella]<>Histone-arginine methyltransferase carm1 [Plutella xylostella]<>unnamed protein product [Plutella xylostella]	(pident:41.98) class I SAM-dependent methyltransferase, partial [Microbacterium arborescens]	(pident:66.596) Full=Histone-arginine methyltransferase CARMER [Aedes aegypti]	GO:0016274(protein-arginine N-methyltransferase activity), GO:0018216(peptidyl-arginine methylation)	IPR041698(Methyltransferase domain 25),IPR029063(S-adenosyl-L-methionine-dependent methyltransferase),IPR025799(Protein arginine N-methyltransferase),IPR020989(Histone-arginine methyltransferase CARM1, N-terminal),IPR011993(PH-like domain superfamily)	PF11531(Coactivator-associated arginine methyltransferase 1 N terminal), PF13649(Methyltransferase domain)	Null	3B3J_A The 2.55 A crystal structure of the apo catalytic domain of coactivator-associated arginine methyl transferase I(CARM1:28-507, residues 28-146 and 479-507 not ordered) [Rattus norvegicus]	Null	Null	Pxyl013171.1 Histone-arginine methyltransferase CARMER OS=Anopheles gambiae OX=7165 GN=CARM1 PE=1 SV=5	Null	TRINITY_GG_918_c2_g1_i3
g26522.t1	(pident:60.246) XP_013137846.1 PREDICTED: myrosinase 1-like [Papilio polytes]	(pident:60.52) unnamed protein product, partial [Leptidea sinapis]	(pident:46.67) GH1 family beta-glucosidase [Clostridium cellulovorans]	(pident:46.977) Full=Myrosinase 1; AltName: Full=Beta-glucosidase 1; AltName: Full=Beta-thioglucosidase 1; AltName: Full=Beta-thioglucosidase glucohydrolase 1; AltName: Full=Sinigrinase 1; AltName: Full=Thioglucosidase 1 [Brevicoryne brassicae]	GO:0004553(hydrolase activity, hydrolyzing O-glycosyl compounds), GO:0005975(carbohydrate metabolic process)	IPR033132(Glycosyl hydrolases family 1, N-terminal conserved site),IPR017853(Glycoside hydrolase superfamily),IPR001360(Glycoside hydrolase family 1)	PF00232(Glycosyl hydrolase family 1)	Null	5CG0_A Crystal structure of Spodoptera frugiperda Beta-glycosidase [Spodoptera frugiperda] /5CG0_B Crystal structure of Spodoptera frugiperda Beta-glycosidase [Spodoptera frugiperda] /5CG0_C Crystal structure of Spodoptera frugiperda Beta-glycosidase [Spodoptera frugiperda] /5CG0_D Crystal structure of Spodoptera frugiperda Beta-glycosidase [Spodoptera frugiperda] /5CG0_E Crystal structure of Spo…	Null	VUY94709.1 unnamed protein product, partial [Leptidea sinapis]	Hfas012103.1 Myrosinase 1 OS=Brevicoryne brassicae OX=69196 PE=1 SV=1	Null	TRINITY_GG_918_c17_g1_i1
g5763.t1	(pident:61.066) XP_013137846.1 PREDICTED: myrosinase 1-like [Papilio polytes]	(pident:61.07) PREDICTED: myrosinase 1-like [Papilio polytes]	(pident:52.22) GH1 family beta-glucosidase [Lonsdalea quercina]	(pident:47.442) Full=Myrosinase 1; AltName: Full=Beta-glucosidase 1; AltName: Full=Beta-thioglucosidase 1; AltName: Full=Beta-thioglucosidase glucohydrolase 1; AltName: Full=Sinigrinase 1; AltName: Full=Thioglucosidase 1 [Brevicoryne brassicae]	GO:0004553(hydrolase activity, hydrolyzing O-glycosyl compounds), GO:0005975(carbohydrate metabolic process)	IPR033132(Glycosyl hydrolases family 1, N-terminal conserved site),IPR017853(Glycoside hydrolase superfamily),IPR001360(Glycoside hydrolase family 1)	PF00232(Glycosyl hydrolase family 1)	protein_Group:_778,_ProteinID:_1149,_lgP:_169.79,_Coverage:_19,_#Peptides:_6,_#Unique:_5,_PTM:_Y,_Avg.Mass:_31419	3AHZ_A Crystal structure of beta-glucosidase from termite Neotermes koshunensis in complex with Tris [Neotermes koshunensis] /3VIF_A Crystal structure of beta-glucosidase from termite Neotermes koshunensis in complex with gluconolactone [Neotermes koshunensis] /3VIG_A Crystal structure of beta-glucosidase from termite Neotermes koshunensis in complex with 1-deoxynojirimycin [Neotermes koshunensis…	Null	VUY94709.1 unnamed protein product, partial [Leptidea sinapis]	Hfas012103.1 Myrosinase 1 OS=Brevicoryne brassicae OX=69196 PE=1 SV=1	Null	TRINITY_GG_918_c17_g1_i1
g5765.t1	(pident:60.493) XP_037965716.1 ATP-dependent RNA helicase DDX24 isoform X1 [Plutella xylostella]	(pident:60.71) hypothetical protein JYU34_014961 [Plutella xylostella]	(pident:34.91) DEAD/DEAH box helicase [Owenweeksia hongkongensis]	(pident:39.799) Full=ATP-dependent RNA helicase DDX24; AltName: Full=DEAD box protein 24 [Homo sapiens]	GO:0003676(nucleic acid binding), GO:0003724(RNA helicase activity), GO:0005524(ATP binding)	IPR027417(P-loop containing nucleoside triphosphate hydrolase),IPR014014(RNA helicase, DEAD-box type, Q motif),IPR014001(Helicase superfamily 1/2, ATP-binding domain),IPR011545(DEAD/DEAH box helicase domain),IPR001650(Helicase, C-terminal)	PF00270(DEAD/DEAH box helicase), PF00271(Helicase conserved C-terminal domain)	Null	Null	Null	Null	Pxyl013170.1 ATP-dependent RNA helicase DDX24 OS=Mus musculus OX=10090 GN=Ddx24 PE=1 SV=2	Null	TRINITY_GG_918_c1_g1_i2
g5768.t1	(pident:66.468) XP_022125877.2 protein LTV1 homolog [Pieris rapae]	(pident:68.45) unnamed protein product, partial [Brenthis ino]	Null	(pident:48.743) Full=Protein LTV1 homolog; AltName: Full=Low temperature viability protein 1; AltName: Full=Ribosome biogenesis factor LTV1 [Drosophila melanogaster]	GO:0042274(ribosomal small subunit biogenesis)	IPR007307(Low temperature viability protein Ltv1)	PF04180(Low temperature viability protein)	Null	Null	Null	Null	Gmel024193.1 Protein LTV1 homolog OS=Xenopus laevis OX=8355 GN=ltv1 PE=2 SV=1	Null	TRINITY_GG_918_c0_g3_i1
g5767.t1	(pident:60.140) PCG66309.1 hypothetical protein B5V51_7852 [Heliothis virescens]	(pident:60.38) trafficking protein particle complex subunit 12-like isoform X2 [Spodoptera frugiperda]	Null	(pident:32.865) Full=Trafficking protein particle complex subunit 12; AltName: Full=Tetratricopeptide repeat protein 15; Short=TPR repeat protein 15 [Mus musculus]	GO:0005515(protein binding)	IPR019734(Tetratricopeptide repeat),IPR011990(Tetratricopeptide-like helical domain superfamily)	PF14559(Tetratricopeptide repeat)	Null	Null	Null	Null	Aips016868.1 Trafficking protein particle complex subunit 12 OS=Mus musculus OX=10090 GN=Trappc12 PE=1 SV=2	Null	TRINITY_GG_918_c0_g2_i1
g36508.t1	(pident:86.415) XP_028168361.1 vacuolar protein sorting-associated protein 35 [Ostrinia furnacalis]	(pident:85.85) vacuolar protein sorting-associated protein 35 [Ostrinia furnacalis]	Null	(pident:62.625) Full=Vacuolar protein sorting-associated protein 35; AltName: Full=Maternal-embryonic 3; AltName: Full=Vesicle protein sorting 35 [Mus musculus]	GO:0015031(protein transport), GO:0030906(retromer, cargo-selective complex), GO:0042147(retrograde transport, endosome to Golgi)	IPR042491(Vacuolar protein sorting-associated protein 35, C-terminal),IPR005378(Vacuolar protein sorting-associated protein 35)	PF03635(Vacuolar protein sorting-associated protein 35)	Null	6VAB_B Mouse retromer sub-structure: VPS35/VPS35 flat dimer [Mus musculus] /6VAB_D Mouse retromer sub-structure: VPS35/VPS35 flat dimer [Mus musculus] /6VAC_A Mouse retromer (VPS26/VPS35/VPS29) heterotrimer [Mus musculus]	Null	Null	Cexi020670.1 locus=fragScaff_scaffold_102:2860486:2889667:- [translate_table: standard]	Null	TRINITY_GG_918_c0_g1_i1
g5769.t1	(pident:85.068) XP_028168361.1 vacuolar protein sorting-associated protein 35 [Ostrinia furnacalis]	(pident:84.52) vacuolar protein sorting-associated protein 35 [Ostrinia furnacalis]	Null	(pident:59.264) Full=Vacuolar protein sorting-associated protein 35; AltName: Full=Maternal-embryonic 3; AltName: Full=Vesicle protein sorting 35 [Mus musculus]	GO:0015031(protein transport), GO:0030906(retromer, cargo-selective complex), GO:0042147(retrograde transport, endosome to Golgi)	IPR042491(Vacuolar protein sorting-associated protein 35, C-terminal),IPR005378(Vacuolar protein sorting-associated protein 35)	PF03635(Vacuolar protein sorting-associated protein 35)	Null	6VAB_B Mouse retromer sub-structure: VPS35/VPS35 flat dimer [Mus musculus] /6VAB_D Mouse retromer sub-structure: VPS35/VPS35 flat dimer [Mus musculus] /6VAC_A Mouse retromer (VPS26/VPS35/VPS29) heterotrimer [Mus musculus]	Null	Null	Cexi020670.1 locus=fragScaff_scaffold_102:2860486:2889667:- [translate_table: standard]	Null	TRINITY_GG_918_c0_g1_i1
g5771.t1	(pident:91.429) XP_037873849.1 vacuolar protein sorting-associated protein 35 isoform X2 [Bombyx mori]	(pident:91.43) vacuolar protein sorting-associated protein 35 isoform X2 [Bombyx mori]	Null	(pident:62.637) Full=Vacuolar protein sorting-associated protein 35; AltName: Full=Maternal-embryonic 3; AltName: Full=Vesicle protein sorting 35 [Mus musculus]	GO:0015031(protein transport), GO:0030906(retromer, cargo-selective complex), GO:0042147(retrograde transport, endosome to Golgi)	IPR005378(Vacuolar protein sorting-associated protein 35)	PF03635(Vacuolar protein sorting-associated protein 35)	Null	7BLN_A Chain A, Vacuolar protein sorting-associated protein 35 [Homo sapiens] /7BLN_C Chain C, Vacuolar protein sorting-associated protein 35 [Homo sapiens]	Null	Null	Bman010640.1 Vacuolar protein sorting-associated protein 35 OS=Mus musculus OX=10090 GN=Vps35 PE=1 SV=1	Null	TRINITY_GG_918_c0_g1_i1
g18324.t1	(pident:60.000) XP_028171610.1 opsin, ultraviolet-sensitive-like [Ostrinia furnacalis]	(pident:60.00) opsin, ultraviolet-sensitive-like [Ostrinia furnacalis]	Null	Null	Null	Null	Null	Null	Null	Null	Null	Ofur006210.1 Opsin Rh3 OS=Drosophila pseudoobscura pseudoobscura OX=46245 GN=Rh3 PE=1 SV=3	Null	TRINITY_GG_917_c6_g1_i1
g18324.t2	(pident:63.472) XP_028171610.1 opsin, ultraviolet-sensitive-like [Ostrinia furnacalis]	(pident:63.47) opsin, ultraviolet-sensitive-like [Ostrinia furnacalis]	(pident:36.42) rhodopsin [Aeromonas veronii]	(pident:40.419) Full=Opsin Rh3; AltName: Full=Inner R7 photoreceptor cells opsin [Drosophila pseudoobscura pseudoobscura]	GO:0004930(G protein-coupled receptor activity), GO:0007186(G protein-coupled receptor signaling pathway), GO:0007601(visual perception), GO:0007602(phototransduction), GO:0016021(integral component of membrane)	IPR027430(Visual pigments (opsins) retinal binding site),IPR017452(GPCR, rhodopsin-like, 7TM),IPR000856(Opsin RH3/RH4),IPR000276(G protein-coupled receptor, rhodopsin-like)	PF00001(7 transmembrane receptor (rhodopsin family))	Null	Null	Null	Null	Ofur006210.1 Opsin Rh3 OS=Drosophila pseudoobscura pseudoobscura OX=46245 GN=Rh3 PE=1 SV=3	Null	TRINITY_GG_917_c6_g1_i1
g8650.t1	(pident:63.472) XP_028171610.1 opsin, ultraviolet-sensitive-like [Ostrinia furnacalis]	(pident:63.47) opsin, ultraviolet-sensitive-like [Ostrinia furnacalis]	(pident:36.42) rhodopsin [Aeromonas veronii]	(pident:40.419) Full=Opsin Rh3; AltName: Full=Inner R7 photoreceptor cells opsin [Drosophila pseudoobscura pseudoobscura]	GO:0004930(G protein-coupled receptor activity), GO:0007186(G protein-coupled receptor signaling pathway), GO:0007601(visual perception), GO:0007602(phototransduction), GO:0016021(integral component of membrane)	IPR027430(Visual pigments (opsins) retinal binding site),IPR017452(GPCR, rhodopsin-like, 7TM),IPR000856(Opsin RH3/RH4),IPR000276(G protein-coupled receptor, rhodopsin-like)	PF00001(7 transmembrane receptor (rhodopsin family))	Null	Null	Null	Null	Ofur006210.1 Opsin Rh3 OS=Drosophila pseudoobscura pseudoobscura OX=46245 GN=Rh3 PE=1 SV=3	Null	TRINITY_GG_917_c6_g1_i1
g18325.t1	(pident:54.603) XP_028171630.1 methionyl-tRNA formyltransferase, mitochondrial [Ostrinia furnacalis]	(pident:54.13) hypothetical protein SFRUCORN_001709 [Spodoptera frugiperda]	(pident:35.22) methionyl-tRNA formyltransferase [Paracoccus sediminilitoris]	(pident:41.368) Full=Methionyl-tRNA formyltransferase, mitochondrial; Short=MtFMT; Flags: Precursor [Mus musculus]	GO:0003824(catalytic activity), GO:0004479(methionyl-tRNA formyltransferase activity), GO:0009058(biosynthetic process), GO:0016742(hydroxymethyl-, formyl- and related transferase activity), GO:0071951(conversion of methionyl-tRNA to N-formyl-methionyl-tRNA)	IPR041711(Methionyl-tRNA formyltransferase, N-terminal domain),IPR036477(Formyl transferase, N-terminal domain superfamily),IPR011034(Formyl transferase-like, C-terminal domain superfamily),IPR005794(Methionyl-tRNA formyltransferase),IPR005793(Formyl transferase, C-terminal),IPR002376(Formyl transferase, N-terminal)	PF00551(Formyl transferase), PF02911(Formyl transferase, C-terminal domain)	Null	Null	Null	Null	Ofur006209.1 Methionyl-tRNA formyltransferase, mitochondrial OS=Bos taurus OX=9913 GN=MTFMT PE=1 SV=2	Null	TRINITY_GG_917_c3_g2_i1
g8649.t1	(pident:53.823) XP_035438454.1 methionyl-tRNA formyltransferase, mitochondrial-like [Spodoptera frugiperda]	(pident:54.88) hypothetical protein SFRUCORN_001709 [Spodoptera frugiperda]	(pident:32.42) methionyl-tRNA formyltransferase [Sneathiella chinensis]	(pident:41.368) Full=Methionyl-tRNA formyltransferase, mitochondrial; Short=MtFMT; Flags: Precursor [Mus musculus]	GO:0003824(catalytic activity), GO:0004479(methionyl-tRNA formyltransferase activity), GO:0009058(biosynthetic process), GO:0016742(hydroxymethyl-, formyl- and related transferase activity), GO:0071951(conversion of methionyl-tRNA to N-formyl-methionyl-tRNA)	IPR041711(Methionyl-tRNA formyltransferase, N-terminal domain),IPR036477(Formyl transferase, N-terminal domain superfamily),IPR011034(Formyl transferase-like, C-terminal domain superfamily),IPR005794(Methionyl-tRNA formyltransferase),IPR005793(Formyl transferase, C-terminal),IPR002376(Formyl transferase, N-terminal)	PF00551(Formyl transferase), PF02911(Formyl transferase, C-terminal domain)	Null	Null	Null	Null	Ofur006209.1 Methionyl-tRNA formyltransferase, mitochondrial OS=Bos taurus OX=9913 GN=MTFMT PE=1 SV=2	Null	TRINITY_GG_917_c3_g2_i1
g18318.t1	(pident:59.903) CAB3239068.1 unnamed protein product [Arctia plantaginis]	(pident:60.19) unnamed protein product [Arctia plantaginis]<>unnamed protein product [Arctia plantaginis]	Null	(pident:58.911) Full=Mannosyl-oligosaccharide alpha-1,2-mannosidase IA; AltName: Full=Alpha-1,2-mannosidase; AltName: Full=Class I alpha-1,2-mannosidase; AltName: Full=Man(9)-alpha-mannosidase; AltName: Full=SfManI [Spodoptera frugiperda]	Null	Null	Null	Null	Null	Null	AAB62720.1 alpha 1,2-mannosidase [Spodoptera frugiperda]	Bbet027134.1 Mannosyl-oligosaccharide alpha-1,2-mannosidase IA OS=Spodoptera frugiperda OX=7108 PE=1 SV=1	Null	TRINITY_GG_917_c3_g1_i2
g18319.t1	(pident:73.831) XP_026322367.1 uncharacterized protein LOC113231979 isoform X1 [Hyposmocoma kahamanoa]	(pident:72.98) uncharacterized protein LOC113231979 isoform X1 [Hyposmocoma kahamanoa]	Null	(pident:48.867) Full=Inactive ubiquitin carboxyl-terminal hydrolase 54; AltName: Full=Inactive ubiquitin-specific peptidase 54 [Rattus norvegicus]	Null	IPR040142(Inactive ubiquitin carboxyl-terminal hydrolase 54),IPR038765(Papain-like cysteine peptidase superfamily),IPR028889(Ubiquitin specific protease domain)	Null	Null	Null	Null	Null	cpo102010.1 Inactive ubiquitin carboxyl-terminal hydrolase 54 OS=Rattus norvegicus OX=10116 GN=Usp54 PE=1 SV=2	Null	TRINITY_GG_917_c0_g1_i13
g18320.t1	(pident:91.667) XP_013164762.1 PREDICTED: uncharacterized protein LOC106115778 isoform X3 [Papilio xuthus]	(pident:91.67) uncharacterized protein LOC105389135 isoform X2 [Plutella xylostella]	Null	(pident:48.438) Full=Inactive ubiquitin carboxyl-terminal hydrolase 54; AltName: Full=Inactive ubiquitin-specific peptidase 54 [Rattus norvegicus]	Null	IPR040142(Inactive ubiquitin carboxyl-terminal hydrolase 54)	Null	Null	Null	Null	Null	Bbet027139.1 Inactive ubiquitin carboxyl-terminal hydrolase 54 OS=Rattus norvegicus OX=10116 GN=Usp54 PE=1 SV=2	Null	TRINITY_GG_917_c0_g1_i13
g22163.t1	(pident:47.315) RVE50756.1 hypothetical protein evm_004666 [Chilo suppressalis]	(pident:45.72) protein lethal(2)denticleless [Ostrinia furnacalis]	Null	(pident:35.061) Full=Protein lethal(2)denticleless; AltName: Full=Protein DTL83 [Drosophila melanogaster]	GO:0005515(protein binding)	IPR036322(WD40-repeat-containing domain superfamily),IPR019775(WD40 repeat, conserved site),IPR015943(WD40/YVTN repeat-like-containing domain superfamily),IPR001680(WD40 repeat)	PF00400(WD domain, G-beta repeat)	Null	Null	Null	Null	Null	Null	TRINITY_GG_91_c0_g1_i4
g30934.t1	(pident:50.364) RVE50756.1 hypothetical protein evm_004666 [Chilo suppressalis]	(pident:49.34) protein lethal(2)denticleless [Ostrinia furnacalis]	Null	(pident:37.805) Full=Protein lethal(2)denticleless; AltName: Full=Protein DTL83 [Drosophila melanogaster]	GO:0005515(protein binding)	IPR036322(WD40-repeat-containing domain superfamily),IPR019775(WD40 repeat, conserved site),IPR015943(WD40/YVTN repeat-like-containing domain superfamily),IPR001680(WD40 repeat)	PF00400(WD domain, G-beta repeat)	Null	Null	Null	Null	Ofur006931.1 Protein lethal(2)denticleless OS=Drosophila melanogaster OX=7227 GN=l(2)dtl PE=1 SV=2	Null	TRINITY_GG_91_c0_g1_i4
g7676.t1	(pident:50.509) RVE50756.1 hypothetical protein evm_004666 [Chilo suppressalis]	(pident:49.48) protein lethal(2)denticleless [Ostrinia furnacalis]	Null	(pident:37.957) Full=Protein lethal(2)denticleless; AltName: Full=Protein DTL83 [Drosophila melanogaster]	GO:0005515(protein binding)	IPR036322(WD40-repeat-containing domain superfamily),IPR019775(WD40 repeat, conserved site),IPR015943(WD40/YVTN repeat-like-containing domain superfamily),IPR001680(WD40 repeat)	PF00400(WD domain, G-beta repeat)	Null	Null	Null	Null	Ofur006931.1 Protein lethal(2)denticleless OS=Drosophila melanogaster OX=7227 GN=l(2)dtl PE=1 SV=2	Null	TRINITY_GG_91_c0_g1_i4
g10862.t1	(pident:48.718) XP_041969201.1 PGC-1 and ERR-induced regulator in muscle protein 1-like isoform X1 [Aricia agestis]	(pident:45.21) uncharacterized protein LOC106719268 [Papilio machaon]	Null	Null	GO:0004867(serine-type endopeptidase inhibitor activity)	IPR036880(Pancreatic trypsin inhibitor Kunitz domain superfamily),IPR002223(Pancreatic trypsin inhibitor Kunitz domain)	PF00014(Kunitz/Bovine pancreatic trypsin inhibitor domain)	Null	Null	Null	Null	Celi014875.1 Putative uncharacterized protein	Null	TRINITY_GG_909_c0_g1_i3
g10832.t1	(pident:85.802) XP_045539989.1 golgin subfamily A member 7 [Papilio machaon]	(pident:85.80) Golgin subfamily A member 7 [Papilio machaon]	Null	(pident:61.345) Full=Golgin subfamily A member 7 [Bos taurus]<> Full=Golgin subfamily A member 7; AltName: Full=Golgi complex-associated protein of 16 kDa [Homo sapiens]	Null	IPR019383(Golgin subfamily A member 7/ERF4)	PF10256(Golgin subfamily A member 7/ERF4 family)	Null	Null	Null	Null	Pmac008069.1 Golgin subfamily A member 7B OS=Mus musculus OX=10090 GN=GOLGA7B PE=1 SV=1	Null	TRINITY_GG_902_c0_g1_i2
g9030.t1	(pident:85.185) XP_045539989.1 golgin subfamily A member 7 [Papilio machaon]	(pident:85.19) Golgin subfamily A member 7 [Papilio machaon]	Null	(pident:61.345) Full=Golgin subfamily A member 7 [Bos taurus]<> Full=Golgin subfamily A member 7; AltName: Full=Golgi complex-associated protein of 16 kDa [Homo sapiens]	Null	IPR019383(Golgin subfamily A member 7/ERF4)	PF10256(Golgin subfamily A member 7/ERF4 family)	Null	Null	Null	Null	Pmac008069.1 Golgin subfamily A member 7B OS=Mus musculus OX=10090 GN=GOLGA7B PE=1 SV=1	Null	TRINITY_GG_902_c0_g1_i2
g13012.t1	(pident:35.714) XP_026493938.1 uncharacterized protein LOC113399115 [Vanessa tameamea]	(pident:35.71) uncharacterized protein LOC113399115 [Vanessa tameamea]	Null	Null	Null	IPR013783(Immunoglobulin-like fold)	Null	Null	Null	Null	Null	Null	Null	TRINITY_GG_901_c2_g1_i1
g9020.t1	(pident:34.127) XP_026493938.1 uncharacterized protein LOC113399115 [Vanessa tameamea]	(pident:34.13) uncharacterized protein LOC113399115 [Vanessa tameamea]	Null	Null	Null	IPR013783(Immunoglobulin-like fold)	Null	Null	Null	Null	Null	Null	Null	TRINITY_GG_901_c2_g1_i1
g10834.t1	(pident:75.325) XP_038219583.1 uncharacterized protein LOC119837873 [Zerene cesonia]	(pident:75.32) uncharacterized protein LOC119837873 [Zerene cesonia]	Null	Null	Null	IPR012464(Protein of unknown function DUF1676),IPR006631(Protein of unknown function DM4/12)	PF07841(DM4/DM12 family)	Null	Null	Null	Null	Hcom018909.1 Putative uncharacterized protein	Null	TRINITY_GG_901_c1_g1_i11
g10836.t1	(pident:56.643) XP_045455322.1 uncharacterized protein LOC123665003 [Melitaea cinxia]	(pident:58.16) unnamed protein product [Plutella xylostella]	Null	Null	Null	IPR012464(Protein of unknown function DUF1676)	PF07898(Protein of unknown function (DUF1676))	Null	Null	Null	Null	Aasp010987.1 Putative uncharacterized protein	Null	TRINITY_GG_901_c1_g1_i11
g10836.t2	(pident:56.811) XP_045486154.1 uncharacterized protein LOC111002437 [Pieris rapae]	(pident:63.27) unnamed protein product [Plutella xylostella]	Null	Null	Null	IPR012464(Protein of unknown function DUF1676)	PF07898(Protein of unknown function (DUF1676))	Null	Null	Null	Null	Aasp010987.1 Putative uncharacterized protein	Null	TRINITY_GG_901_c1_g1_i11
g10837.t1	(pident:47.727) CAH0721090.1 unnamed protein product, partial [Brenthis ino]	(pident:49.03) unnamed protein product [Plutella xylostella]	Null	Null	Null	IPR012464(Protein of unknown function DUF1676)	PF07898(Protein of unknown function (DUF1676))	Null	Null	Null	Null	Ecla007576.1 Putative uncharacterized protein	Null	TRINITY_GG_901_c1_g1_i11
g22001.t1	(pident:67.322) XP_045455322.1 uncharacterized protein LOC123665003 [Melitaea cinxia]	(pident:67.30) hypothetical protein JYU34_019193 [Plutella xylostella]	Null	Null	Null	IPR012464(Protein of unknown function DUF1676)	PF07898(Protein of unknown function (DUF1676))	Null	Null	Null	Null	Etag010541.1 Putative uncharacterized protein	Null	TRINITY_GG_901_c1_g1_i11
g22003.t1	(pident:75.325) XP_038219583.1 uncharacterized protein LOC119837873 [Zerene cesonia]	(pident:75.32) uncharacterized protein LOC119837873 [Zerene cesonia]	Null	Null	Null	IPR012464(Protein of unknown function DUF1676),IPR006631(Protein of unknown function DM4/12)	PF07841(DM4/DM12 family)	Null	Null	Null	Null	Hcom018909.1 Putative uncharacterized protein	Null	TRINITY_GG_901_c1_g1_i11
g9024.t1	(pident:46.561) CAH0721090.1 unnamed protein product, partial [Brenthis ino]	(pident:58.47) unnamed protein product [Plutella xylostella]	Null	Null	Null	IPR012464(Protein of unknown function DUF1676)	PF07898(Protein of unknown function (DUF1676))	Null	Null	Null	Null	Ecla007576.1 Putative uncharacterized protein	Null	TRINITY_GG_901_c1_g1_i11
g9028.t1	(pident:69.913) XP_045486154.1 uncharacterized protein LOC111002437 [Pieris rapae]	(pident:70.46) unnamed protein product [Plutella xylostella]	Null	Null	Null	IPR012464(Protein of unknown function DUF1676),IPR006631(Protein of unknown function DM4/12)	PF07841(DM4/DM12 family), PF07898(Protein of unknown function (DUF1676))	Null	Null	Null	Null	Etag010541.1 Putative uncharacterized protein	Null	TRINITY_GG_901_c1_g1_i11
g21999.t1	(pident:70.632) XP_038219546.1 uncharacterized protein LOC119837841 [Zerene cesonia]	(pident:81.65) uncharacterized protein LOC114364934 [Ostrinia furnacalis]	(pident:48.06) DUF1676 domain-containing protein, partial [Acinetobacter pittii]	Null	Null	IPR012464(Protein of unknown function DUF1676)	PF07898(Protein of unknown function (DUF1676))	Null	Null	Null	Null	Ahon009157.1 Putative uncharacterized protein	Null	TRINITY_GG_901_c0_g2_i2
g26847.t1	(pident:70.632) XP_038219546.1 uncharacterized protein LOC119837841 [Zerene cesonia]	(pident:81.65) uncharacterized protein LOC114364934 [Ostrinia furnacalis]	(pident:48.06) DUF1676 domain-containing protein, partial [Acinetobacter pittii]	Null	Null	IPR012464(Protein of unknown function DUF1676)	PF07898(Protein of unknown function (DUF1676))	Null	Null	Null	Null	Ahon009157.1 Putative uncharacterized protein	Null	TRINITY_GG_901_c0_g2_i2
g9023.t1	(pident:64.103) XP_039760814.1 uncharacterized protein LOC120634364 [Pararge aegeria]	(pident:61.32) uncharacterized protein LOC105391600 [Plutella xylostella]<>unnamed protein product [Plutella xylostella]	Null	Null	Null	IPR012464(Protein of unknown function DUF1676)	PF07898(Protein of unknown function (DUF1676))	Null	Null	Null	Null	Zces008145.1 Putative uncharacterized protein	Null	TRINITY_GG_901_c0_g2_i2
g10833.t1	(pident:78.519) XP_013185063.1 PREDICTED: uncharacterized protein LOC106130707 [Amyelois transitella]	(pident:79.26) uncharacterized protein LOC113498577 [Trichoplusia ni]	Null	Null	Null	IPR012464(Protein of unknown function DUF1676)	PF07898(Protein of unknown function (DUF1676))	Null	Null	Null	Null	Ptre011609.1 Putative uncharacterized protein	Null	TRINITY_GG_901_c0_g1_i1
g9029.t1	(pident:77.778) XP_013185063.1 PREDICTED: uncharacterized protein LOC106130707 [Amyelois transitella]	(pident:78.52) uncharacterized protein LOC113498577 [Trichoplusia ni]	Null	Null	Null	IPR012464(Protein of unknown function DUF1676)	PF07898(Protein of unknown function (DUF1676))	Null	Null	Null	Null	Badu007534.1 Putative uncharacterized protein	Null	TRINITY_GG_901_c0_g1_i1
g10259.t1	Null	Null	Null	Null	Null	Null	Null	Null	Null	Null	Null	Null	Null	TRINITY_GG_899_c0_g1_i1
g10260.t1	Null	Null	Null	Null	Null	Null	Null	Null	Null	Null	Null	Null	Null	TRINITY_GG_899_c0_g1_i1
g10344.t1	(pident:48.447) XP_039761322.1 uncharacterized protein LOC120634657 [Pararge aegeria]	(pident:47.48) uncharacterized protein LOC120634657 [Pararge aegeria]	(pident:47.41) hypothetical protein, partial [Pseudomonas aeruginosa]	Null	Null	Null	Null	Null	Null	Null	Null	Null	Null	TRINITY_GG_899_c0_g1_i1
g10595.t1	(pident:39.394) KOB77738.1 Gag-like protein [Operophtera brumata]	Null	Null	Null	Null	Null	Null	Null	Null	Null	Null	Null	Null	TRINITY_GG_899_c0_g1_i1
g25987.t1	(pident:38.561) XP_039760442.1 uncharacterized protein LOC120634116 [Pararge aegeria]	(pident:40.00) uncharacterized protein LOC120634116 [Pararge aegeria]	(pident:44.96) hypothetical protein, partial [Acinetobacter baumannii]	Null	Null	Null	Null	Null	Null	Null	Null	Null	Null	TRINITY_GG_899_c0_g1_i1
g274.t1	(pident:38.211) KOB77738.1 Gag-like protein [Operophtera brumata]	(pident:36.44) Gag-like protein [Operophtera brumata]	Null	Null	Null	Null	Null	Null	Null	Null	Null	Null	Null	TRINITY_GG_899_c0_g1_i1
g35787.t1	Null	Null	Null	Null	Null	Null	Null	Null	Null	Null	Null	Null	Null	TRINITY_GG_899_c0_g1_i1
g35793.t1	(pident:50.000) XP_039761486.1 uncharacterized protein LOC120634778 [Pararge aegeria]	Null	Null	Null	Null	Null	Null	Null	Null	Null	Null	Null	Null	TRINITY_GG_899_c0_g1_i1
g10194.t1	(pident:54.545) XP_039761325.1 uncharacterized protein LOC120634659 [Pararge aegeria]	(pident:66.09) uncharacterized protein LOC123879824 [Maniola jurtina]	(pident:48.61) hypothetical protein [Acinetobacter baumannii]	Null	GO:0003676(nucleic acid binding), GO:0008270(zinc ion binding)	IPR036875(Zinc finger, CCHC-type superfamily),IPR001878(Zinc finger, CCHC-type)	PF00098(Zinc knuckle)	Null	Null	Null	Null	Tbra011512.1 Putative uncharacterized protein	Null	TRINITY_GG_898_c0_g1_i1
g10300.t1	(pident:35.343) XP_032524318.1 uncharacterized protein LOC116775545 [Danaus plexippus plexippus]	(pident:33.04) uncharacterized protein LOC120634778 [Pararge aegeria]	(pident:47.29) hypothetical protein [Pseudomonas aeruginosa]	Null	GO:0003676(nucleic acid binding), GO:0008270(zinc ion binding)	IPR036875(Zinc finger, CCHC-type superfamily),IPR001878(Zinc finger, CCHC-type)	PF00098(Zinc knuckle)	Null	Null	Null	Null	Null	Null	TRINITY_GG_898_c0_g1_i1
g10327.t1	(pident:45.122) XP_039760442.1 uncharacterized protein LOC120634116 [Pararge aegeria]	(pident:45.21) uncharacterized protein LOC120634116 [Pararge aegeria]	(pident:48.12) hypothetical protein [Pseudomonas aeruginosa]	Null	GO:0003676(nucleic acid binding), GO:0008270(zinc ion binding)	IPR036875(Zinc finger, CCHC-type superfamily),IPR001878(Zinc finger, CCHC-type)	PF00098(Zinc knuckle)	Null	Null	Null	Null	Null	Null	TRINITY_GG_898_c0_g1_i1
g10598.t1	(pident:42.482) XP_039761821.1 uncharacterized protein LOC120634984 [Pararge aegeria]	(pident:44.38) uncharacterized protein LOC120634116 [Pararge aegeria]	(pident:46.28) hypothetical protein [Pseudomonas aeruginosa]	Null	GO:0003676(nucleic acid binding), GO:0008270(zinc ion binding)	IPR036875(Zinc finger, CCHC-type superfamily),IPR001878(Zinc finger, CCHC-type)	Null	Null	Null	Null	Null	Null	Null	TRINITY_GG_898_c0_g1_i1
g10998.t1	(pident:51.661) XP_039761821.1 uncharacterized protein LOC120634984 [Pararge aegeria]	(pident:49.47) unnamed protein product [Trichogramma brassicae]	(pident:46.28) hypothetical protein [Pseudomonas aeruginosa]	Null	GO:0003676(nucleic acid binding), GO:0008270(zinc ion binding)	IPR036875(Zinc finger, CCHC-type superfamily),IPR001878(Zinc finger, CCHC-type)	Null	Null	Null	Null	Null	Paeg009296.1 Putative uncharacterized protein	Null	TRINITY_GG_898_c0_g1_i1
g12554.t1	(pident:51.568) XP_039761291.1 uncharacterized protein LOC120634623 [Pararge aegeria]	(pident:55.47) uncharacterized protein LOC120634623 [Pararge aegeria]	(pident:47.52) hypothetical protein [Pseudomonas aeruginosa]	Null	GO:0003676(nucleic acid binding), GO:0008270(zinc ion binding)	IPR036875(Zinc finger, CCHC-type superfamily),IPR001878(Zinc finger, CCHC-type)	PF00098(Zinc knuckle)	Null	Null	Null	Null	Paeg010560.1 Putative uncharacterized protein	Null	TRINITY_GG_898_c0_g1_i1
g12903.t1	(pident:42.649) XP_039761821.1 uncharacterized protein LOC120634984 [Pararge aegeria]	(pident:41.92) uncharacterized protein LOC120634116 [Pararge aegeria]	(pident:45.93) hypothetical protein [Pseudomonas aeruginosa]	Null	GO:0003676(nucleic acid binding), GO:0008270(zinc ion binding)	IPR036875(Zinc finger, CCHC-type superfamily),IPR001878(Zinc finger, CCHC-type)	Null	Null	Null	Null	Null	Null	Null	TRINITY_GG_898_c0_g1_i1
g13046.t1	(pident:42.396) XP_039760442.1 uncharacterized protein LOC120634116 [Pararge aegeria]	(pident:45.89) uncharacterized protein LOC120634116 [Pararge aegeria]	(pident:48.76) hypothetical protein [Pseudomonas aeruginosa]	Null	GO:0003676(nucleic acid binding), GO:0008270(zinc ion binding)	IPR036875(Zinc finger, CCHC-type superfamily),IPR001878(Zinc finger, CCHC-type)	PF00098(Zinc knuckle)	Null	Null	Null	Null	Null	Null	TRINITY_GG_898_c0_g1_i1
g14908.t1	(pident:35.334) XP_039760442.1 uncharacterized protein LOC120634116 [Pararge aegeria]	(pident:37.18) uncharacterized protein LOC120634116 [Pararge aegeria]	(pident:36.99) hypothetical protein [Pseudomonas aeruginosa]	Null	Null	Null	Null	Null	Null	Null	Null	Null	Null	TRINITY_GG_898_c0_g1_i1
g18536.t1	(pident:43.182) XP_039760442.1 uncharacterized protein LOC120634116 [Pararge aegeria]	(pident:44.38) uncharacterized protein LOC120634116 [Pararge aegeria]	(pident:46.28) hypothetical protein [Pseudomonas aeruginosa]	Null	GO:0003676(nucleic acid binding), GO:0008270(zinc ion binding)	IPR036875(Zinc finger, CCHC-type superfamily),IPR001878(Zinc finger, CCHC-type)	Null	Null	Null	Null	Null	Null	Null	TRINITY_GG_898_c0_g1_i1
g20461.t1	(pident:41.026) XP_023954128.1 uncharacterized protein LOC112057814 [Bicyclus anynana]	Null	Null	Null	Null	Null	Null	Null	Null	Null	Null	Null	Null	TRINITY_GG_898_c0_g1_i1
g21921.t1	(pident:45.383) XP_039761821.1 uncharacterized protein LOC120634984 [Pararge aegeria]	(pident:50.18) uncharacterized protein LOC114362390 [Ostrinia furnacalis]	(pident:45.08) hypothetical protein [Pseudomonas aeruginosa]	Null	GO:0003676(nucleic acid binding), GO:0008270(zinc ion binding)	IPR036875(Zinc finger, CCHC-type superfamily),IPR001878(Zinc finger, CCHC-type)	PF00098(Zinc knuckle)	Null	Null	Null	Null	Paeg002567.1 Putative uncharacterized protein	Null	TRINITY_GG_898_c0_g1_i1
g22428.t1	(pident:42.955) XP_039761821.1 uncharacterized protein LOC120634984 [Pararge aegeria]	(pident:44.63) uncharacterized protein LOC120634116 [Pararge aegeria]	(pident:44.87) hypothetical protein [Pseudomonas aeruginosa]	Null	GO:0003676(nucleic acid binding), GO:0008270(zinc ion binding)	IPR036875(Zinc finger, CCHC-type superfamily),IPR001878(Zinc finger, CCHC-type)	PF00098(Zinc knuckle)	Null	Null	Null	Null	Null	Null	TRINITY_GG_898_c0_g1_i1
g22541.t1	(pident:50.000) XP_045511082.1 uncharacterized protein LOC123706007 [Colias croceus]	Null	Null	Null	GO:0003676(nucleic acid binding), GO:0008270(zinc ion binding)	IPR036875(Zinc finger, CCHC-type superfamily)	Null	Null	Null	Null	Null	Pmet025365.1 Putative uncharacterized protein	Null	TRINITY_GG_898_c0_g1_i1
g22556.t1	(pident:39.297) XP_039760442.1 uncharacterized protein LOC120634116 [Pararge aegeria]	(pident:39.60) uncharacterized protein LOC120634116 [Pararge aegeria]	(pident:46.58) hypothetical protein [Pseudomonas aeruginosa]	Null	GO:0003676(nucleic acid binding), GO:0008270(zinc ion binding)	IPR036875(Zinc finger, CCHC-type superfamily),IPR001878(Zinc finger, CCHC-type)	PF00098(Zinc knuckle)	Null	Null	Null	Null	Null	Null	TRINITY_GG_898_c0_g1_i1
g2390.t1	(pident:41.843) XP_039760442.1 uncharacterized protein LOC120634116 [Pararge aegeria]	(pident:43.22) uncharacterized protein LOC120634116 [Pararge aegeria]	(pident:46.89) hypothetical protein [Pseudomonas aeruginosa]	Null	GO:0003676(nucleic acid binding), GO:0008270(zinc ion binding)	IPR036875(Zinc finger, CCHC-type superfamily),IPR001878(Zinc finger, CCHC-type)	PF00098(Zinc knuckle)	Null	Null	Null	Null	Null	Null	TRINITY_GG_898_c0_g1_i1
g26219.t1	(pident:58.273) XP_045783674.1 uncharacterized protein LOC123879824 [Maniola jurtina]	(pident:67.83) uncharacterized protein LOC123879824 [Maniola jurtina]	Null	Null	GO:0003676(nucleic acid binding), GO:0008270(zinc ion binding)	IPR036875(Zinc finger, CCHC-type superfamily),IPR001878(Zinc finger, CCHC-type)	PF00098(Zinc knuckle)	Null	Null	Null	Null	Paeg002567.1 Putative uncharacterized protein	Null	TRINITY_GG_898_c0_g1_i1
g26223.t1	(pident:43.981) XP_023954128.1 uncharacterized protein LOC112057814 [Bicyclus anynana]	(pident:38.71) Gag-like protein [Operophtera brumata]	(pident:46.67) hypothetical protein, partial [Acinetobacter baumannii]	Null	Null	Null	Null	Null	Null	Null	Null	Cnem022890.1 Putative uncharacterized protein	Null	TRINITY_GG_898_c0_g1_i1
g26224.t2	(pident:39.793) XP_039761821.1 uncharacterized protein LOC120634984 [Pararge aegeria]	(pident:42.64) uncharacterized protein LOC120634116 [Pararge aegeria]	(pident:47.43) hypothetical protein [Pseudomonas aeruginosa]	Null	GO:0003676(nucleic acid binding), GO:0008270(zinc ion binding)	IPR036875(Zinc finger, CCHC-type superfamily),IPR001878(Zinc finger, CCHC-type)	PF00098(Zinc knuckle)	Null	Null	Null	Null	Null	Null	TRINITY_GG_898_c0_g1_i1
g26227.t1	(pident:40.034) XP_039760442.1 uncharacterized protein LOC120634116 [Pararge aegeria]	(pident:41.01) uncharacterized protein LOC120634116 [Pararge aegeria]	(pident:39.08) hypothetical protein [Pseudomonas aeruginosa]	Null	Null	Null	Null	Null	Null	Null	Null	Null	Null	TRINITY_GG_898_c0_g1_i1
g30836.t1	(pident:46.154) XP_039761821.1 uncharacterized protein LOC120634984 [Pararge aegeria]	(pident:46.93) uncharacterized protein LOC120634116 [Pararge aegeria]	(pident:46.28) hypothetical protein [Pseudomonas aeruginosa]	Null	GO:0003676(nucleic acid binding), GO:0008270(zinc ion binding)	IPR036875(Zinc finger, CCHC-type superfamily),IPR001878(Zinc finger, CCHC-type)	Null	Null	Null	Null	Null	Null	Null	TRINITY_GG_898_c0_g1_i1
g34051.t1	(pident:41.606) XP_039761486.1 uncharacterized protein LOC120634778 [Pararge aegeria]	(pident:43.27) uncharacterized protein LOC120634984 [Pararge aegeria]	(pident:44.72) hypothetical protein [Pseudomonas aeruginosa]	Null	GO:0003676(nucleic acid binding), GO:0008270(zinc ion binding)	IPR036875(Zinc finger, CCHC-type superfamily),IPR001878(Zinc finger, CCHC-type)	PF00098(Zinc knuckle)	Null	Null	Null	Null	Null	Null	TRINITY_GG_898_c0_g1_i1
g35782.t1	(pident:40.535) XP_039760442.1 uncharacterized protein LOC120634116 [Pararge aegeria]	(pident:42.07) uncharacterized protein LOC120634116 [Pararge aegeria]	(pident:44.38) hypothetical protein, partial [Acinetobacter baumannii]	Null	Null	Null	Null	Null	Null	Null	Null	Null	Null	TRINITY_GG_898_c0_g1_i1
g35788.t1	(pident:41.870) KOB72047.1 Gag-like protein [Operophtera brumata]	(pident:46.75) uncharacterized protein LOC113503567 [Trichoplusia ni]	(pident:43.84) hypothetical protein, partial [Acinetobacter baumannii]	Null	Null	Null	Null	Null	Null	Null	Null	Null	Null	TRINITY_GG_898_c0_g1_i1
g35794.t1	(pident:41.768) XP_026746968.1 uncharacterized protein LOC113508211 [Trichoplusia ni]	(pident:44.72) uncharacterized protein LOC114362390 [Ostrinia furnacalis]	(pident:45.09) hypothetical protein, partial [Acinetobacter baumannii]	Null	GO:0003676(nucleic acid binding), GO:0008270(zinc ion binding)	IPR036875(Zinc finger, CCHC-type superfamily)	Null	Null	Null	Null	Null	Null	Null	TRINITY_GG_898_c0_g1_i1
g36386.t1	(pident:44.706) XP_039760442.1 uncharacterized protein LOC120634116 [Pararge aegeria]	(pident:47.16) uncharacterized protein LOC120634623 [Pararge aegeria]	(pident:47.83) hypothetical protein [Pseudomonas aeruginosa]	Null	GO:0003676(nucleic acid binding), GO:0008270(zinc ion binding)	IPR036875(Zinc finger, CCHC-type superfamily),IPR001878(Zinc finger, CCHC-type)	PF00098(Zinc knuckle)	Null	Null	Null	Null	Dchr011352.1 Putative 115 kDa protein in type-1 retrotransposable element R1DM OS=Drosophila melanogaster OX=7227 GN=R1A1-element\ORF2 PE=4 SV=1	Null	TRINITY_GG_898_c0_g1_i1
g36614.t1	(pident:46.410) XP_023947756.1 uncharacterized protein LOC112052772 [Bicyclus anynana]	(pident:45.73) uncharacterized protein LOC120634623 [Pararge aegeria]	(pident:44.44) hypothetical protein [Pseudomonas aeruginosa]	Null	GO:0003676(nucleic acid binding), GO:0008270(zinc ion binding)	IPR036875(Zinc finger, CCHC-type superfamily),IPR001878(Zinc finger, CCHC-type)	PF00098(Zinc knuckle)	Null	Null	Null	Null	Null	Null	TRINITY_GG_898_c0_g1_i1
g5798.t1	(pident:46.650) XP_039761821.1 uncharacterized protein LOC120634984 [Pararge aegeria]	(pident:45.87) uncharacterized protein LOC120634116 [Pararge aegeria]	(pident:45.53) hypothetical protein [Pseudomonas aeruginosa]	Null	GO:0003676(nucleic acid binding), GO:0008270(zinc ion binding)	IPR036875(Zinc finger, CCHC-type superfamily),IPR001878(Zinc finger, CCHC-type)	PF00098(Zinc knuckle)	Null	Null	Null	Null	Aper012733.1 Putative uncharacterized protein	Null	TRINITY_GG_898_c0_g1_i1
g6249.t1	(pident:42.190) XP_039761821.1 uncharacterized protein LOC120634984 [Pararge aegeria]	(pident:42.58) uncharacterized protein LOC120634116 [Pararge aegeria]	(pident:45.53) hypothetical protein [Pseudomonas aeruginosa]	Null	GO:0003676(nucleic acid binding), GO:0008270(zinc ion binding)	IPR036875(Zinc finger, CCHC-type superfamily),IPR001878(Zinc finger, CCHC-type)	PF00098(Zinc knuckle)	Null	Null	Null	Null	Null	Null	TRINITY_GG_898_c0_g1_i1
g9585.t1	(pident:35.334) XP_039760442.1 uncharacterized protein LOC120634116 [Pararge aegeria]	(pident:37.18) uncharacterized protein LOC120634116 [Pararge aegeria]	(pident:36.99) hypothetical protein [Pseudomonas aeruginosa]	Null	Null	Null	Null	Null	Null	Null	Null	Null	Null	TRINITY_GG_898_c0_g1_i1
g10038.t1	(pident:47.777) XP_026741398.1 uncharacterized protein LOC113503567 [Trichoplusia ni]	(pident:35.21) uncharacterized protein LOC106719018 [Papilio machaon]	(pident:41.25) endonuclease/exonuclease/phosphatase family protein [Pseudomonas aeruginosa]	(pident:26.154) Full=Putative 115 kDa protein in type-1 retrotransposable element R1DM; AltName: Full=ORF 2; AltName: Full=Putative 115 kDa protein in type I retrotransposable element R1DM [Drosophila melanogaster]	GO:0003824(catalytic activity)	IPR036691(Endonuclease/exonuclease/phosphatase superfamily),IPR005135(Endonuclease/exonuclease/phosphatase)	PF14529(Endonuclease-reverse transcriptase)	Null	Null	Null	Null	Null	Null	TRINITY_GG_894_c0_g1_i1
g10174.t1	(pident:42.975) XP_039761821.1 uncharacterized protein LOC120634984 [Pararge aegeria]	(pident:44.54) uncharacterized protein LOC120634116 [Pararge aegeria]	(pident:46.85) hypothetical protein [Pseudomonas aeruginosa]	Null	GO:0003676(nucleic acid binding), GO:0008270(zinc ion binding)	IPR036875(Zinc finger, CCHC-type superfamily),IPR001878(Zinc finger, CCHC-type)	PF00098(Zinc knuckle)	Null	Null	Null	Null	Null	Null	TRINITY_GG_894_c0_g1_i1
g10183.t1	(pident:60.500) XP_037877375.1 uncharacterized protein LOC119630918, partial [Bombyx mori]	(pident:60.59) hypothetical protein, partial [Pseudomonas aeruginosa]	(pident:60.59) hypothetical protein, partial [Pseudomonas aeruginosa]	Null	Null	Null	Null	Null	Null	Null	Null	Ayam001840.1 Retrovirus-related Pol polyprotein from type-1 retrotransposable element R1 (Fragment) OS=Bradysia coprophila OX=38358 PE=4 SV=1	Null	TRINITY_GG_894_c0_g1_i1
g10188.t1	(pident:41.667) XP_039761821.1 uncharacterized protein LOC120634984 [Pararge aegeria]	(pident:44.06) uncharacterized protein LOC120634116 [Pararge aegeria]	(pident:46.99) hypothetical protein [Pseudomonas aeruginosa]	Null	GO:0003676(nucleic acid binding), GO:0008270(zinc ion binding)	IPR036875(Zinc finger, CCHC-type superfamily),IPR001878(Zinc finger, CCHC-type)	PF00098(Zinc knuckle)	Null	Null	Null	Null	Null	Null	TRINITY_GG_894_c0_g1_i1
g10192.t1	(pident:36.585) XP_037871371.1 titin homolog [Bombyx mori]	(pident:36.87) PREDICTED: uncharacterized protein LOC106114549 [Papilio xuthus]	Null	Null	Null	Null	Null	Null	Null	Null	Null	Null	Null	TRINITY_GG_894_c0_g1_i1
g10261.t1	Null	Null	Null	Null	Null	Null	Null	Null	Null	Null	Null	Null	Null	TRINITY_GG_894_c0_g1_i1
g10303.t1	(pident:67.460) XP_028039297.1 LOW QUALITY PROTEIN: uncharacterized protein LOC114249793 [Bombyx mandarina]	(pident:66.67) hypothetical protein O3G_MSEX012902 [Manduca sexta]	(pident:62.28) hypothetical protein, partial [Acinetobacter baumannii]	Null	Null	IPR000477(Reverse transcriptase domain)	PF00078(Reverse transcriptase (RNA-dependent DNA polymerase))	Null	Null	Null	Null	Bman006893.1 Putative fatty acyl-CoA reductase CG5065 OS=Drosophila melanogaster OX=7227 GN=CG5065 PE=3 SV=1	Null	TRINITY_GG_894_c0_g1_i1
g10305.t1	(pident:41.333) XP_039761821.1 uncharacterized protein LOC120634984 [Pararge aegeria]	(pident:43.53) uncharacterized protein LOC120634116 [Pararge aegeria]	(pident:46.99) hypothetical protein [Pseudomonas aeruginosa]	Null	GO:0003676(nucleic acid binding), GO:0008270(zinc ion binding)	IPR036875(Zinc finger, CCHC-type superfamily),IPR001878(Zinc finger, CCHC-type)	PF00098(Zinc knuckle)	Null	Null	Null	Null	Null	Null	TRINITY_GG_894_c0_g1_i1
g10524.t1	(pident:46.674) XP_026741398.1 uncharacterized protein LOC113503567 [Trichoplusia ni]	(pident:46.80) uncharacterized protein LOC113503567 [Trichoplusia ni]	(pident:50.71) endonuclease/exonuclease/phosphatase family protein, partial [Acinetobacter baumannii]	Null	GO:0003676(nucleic acid binding), GO:0003824(catalytic activity), GO:0008270(zinc ion binding)	IPR036875(Zinc finger, CCHC-type superfamily),IPR036691(Endonuclease/exonuclease/phosphatase superfamily),IPR005135(Endonuclease/exonuclease/phosphatase),IPR001878(Zinc finger, CCHC-type)	PF14529(Endonuclease-reverse transcriptase)	Null	Null	Null	Null	Null	Null	TRINITY_GG_894_c0_g1_i1
g10596.t1	(pident:39.924) XP_013163265.1 PREDICTED: uncharacterized protein LOC106114549 [Papilio xuthus]	(pident:46.56) uncharacterized protein LOC121732664 [Aricia agestis]	(pident:41.83) hypothetical protein, partial [Pseudomonas aeruginosa]	Null	Null	Null	Null	Null	Null	Null	Null	Null	Null	TRINITY_GG_894_c0_g1_i1
g10609.t1	(pident:40.773) XP_039761322.1 uncharacterized protein LOC120634657 [Pararge aegeria]	(pident:44.64) uncharacterized protein LOC120634657 [Pararge aegeria]	(pident:43.70) hypothetical protein, partial [Pseudomonas aeruginosa]	Null	Null	Null	Null	Null	Null	Null	Null	Null	Null	TRINITY_GG_894_c0_g1_i1
g12925.t1	(pident:41.946) XP_039761821.1 uncharacterized protein LOC120634984 [Pararge aegeria]	(pident:44.19) uncharacterized protein LOC120634116 [Pararge aegeria]	(pident:47.35) hypothetical protein [Pseudomonas aeruginosa]	Null	GO:0003676(nucleic acid binding), GO:0008270(zinc ion binding)	IPR036875(Zinc finger, CCHC-type superfamily),IPR001878(Zinc finger, CCHC-type)	PF00098(Zinc knuckle)	Null	Null	Null	Null	Null	Null	TRINITY_GG_894_c0_g1_i1
g13475.t1	(pident:35.802) XP_037870366.1 uncharacterized protein LOC119629251 [Bombyx mori]	(pident:36.42) uncharacterized protein LOC123653928 [Melitaea cinxia]	(pident:35.33) endonuclease/exonuclease/phosphatase family protein, partial [Pseudomonas aeruginosa]	Null	Null	IPR036691(Endonuclease/exonuclease/phosphatase superfamily)	Null	Null	Null	Null	Null	Null	Null	TRINITY_GG_894_c0_g1_i1
g13493.t1	(pident:40.000) XP_039760442.1 uncharacterized protein LOC120634116 [Pararge aegeria]	(pident:36.89) titin homolog [Bombyx mori]	(pident:46.11) hypothetical protein, partial [Acinetobacter baumannii]	Null	Null	Null	Null	Null	Null	Null	Null	Null	Null	TRINITY_GG_894_c0_g1_i1
g13495.t1	(pident:43.237) XP_045535743.1 uncharacterized protein LOC106719018 [Papilio machaon]	(pident:40.71) uncharacterized protein LOC106719018 [Papilio machaon]	(pident:46.29) endonuclease/exonuclease/phosphatase family protein [Pseudomonas aeruginosa]	(pident:26.570) Full=Putative 115 kDa protein in type-1 retrotransposable element R1DM; AltName: Full=ORF 2; AltName: Full=Putative 115 kDa protein in type I retrotransposable element R1DM [Drosophila melanogaster]	GO:0003676(nucleic acid binding), GO:0003824(catalytic activity), GO:0008270(zinc ion binding)	IPR043502(DNA/RNA polymerase superfamily),IPR036875(Zinc finger, CCHC-type superfamily),IPR036691(Endonuclease/exonuclease/phosphatase superfamily),IPR005135(Endonuclease/exonuclease/phosphatase),IPR001878(Zinc finger, CCHC-type),IPR000477(Reverse transcriptase domain)	PF00078(Reverse transcriptase (RNA-dependent DNA polymerase)), PF00098(Zinc knuckle), PF14529(Endonuclease-reverse transcriptase)	Null	Null	Null	Null	Null	Null	TRINITY_GG_894_c0_g1_i1
g14129.t1	(pident:36.975) XP_039761322.1 uncharacterized protein LOC120634657 [Pararge aegeria]	(pident:39.50) uncharacterized protein LOC120634657 [Pararge aegeria]	(pident:44.70) hypothetical protein, partial [Pseudomonas aeruginosa]	Null	Null	Null	Null	Null	Null	Null	Null	Null	Null	TRINITY_GG_894_c0_g1_i1
g14145.t1	(pident:67.308) XP_026324768.1 uncharacterized protein LOC113233779 [Hyposmocoma kahamanoa]	(pident:66.04) uncharacterized protein LOC113233779 [Hyposmocoma kahamanoa]	(pident:42.31) hypothetical protein, partial [Chryseobacterium sp. RR2-3-20]	Null	Null	Null	Null	Null	Null	Null	Null	Hkah007404.1 Activating molecule in BECN1-regulated autophagy protein 1 OS=Homo sapiens OX=9606 GN=AMBRA1 PE=1 SV=2	Null	TRINITY_GG_894_c0_g1_i1
g14903.t1	(pident:43.234) XP_039760442.1 uncharacterized protein LOC120634116 [Pararge aegeria]	(pident:45.34) uncharacterized protein LOC120634116 [Pararge aegeria]	(pident:46.99) hypothetical protein [Pseudomonas aeruginosa]	Null	GO:0003676(nucleic acid binding), GO:0008270(zinc ion binding)	IPR036875(Zinc finger, CCHC-type superfamily),IPR001878(Zinc finger, CCHC-type)	PF00098(Zinc knuckle)	Null	Null	Null	Null	Null	Null	TRINITY_GG_894_c0_g1_i1
g15020.t1	(pident:45.501) XP_045535743.1 uncharacterized protein LOC106719018 [Papilio machaon]	(pident:45.25) uncharacterized protein LOC106719018 [Papilio machaon]	(pident:56.04) endonuclease/exonuclease/phosphatase family protein [Pseudomonas aeruginosa]	(pident:27.380) Full=Retrovirus-related Pol polyprotein from type-1 retrotransposable element R1; AltName: Full=Retrovirus-related Pol polyprotein from type I retrotransposable element R1; Includes: Full=Reverse transcriptase; Includes: Full=Endonuclease [Bradysia coprophila]	GO:0003676(nucleic acid binding), GO:0003824(catalytic activity), GO:0008270(zinc ion binding)	IPR043502(DNA/RNA polymerase superfamily),IPR036875(Zinc finger, CCHC-type superfamily),IPR036691(Endonuclease/exonuclease/phosphatase superfamily),IPR005135(Endonuclease/exonuclease/phosphatase),IPR001878(Zinc finger, CCHC-type),IPR000477(Reverse transcriptase domain)	PF00078(Reverse transcriptase (RNA-dependent DNA polymerase)), PF14529(Endonuclease-reverse transcriptase)	Null	Null	Null	Null	Aper016591.1 Putative 115 kDa protein in type-1 retrotransposable element R1DM OS=Drosophila melanogaster OX=7227 GN=R1A1-element\ORF2 PE=4 SV=1	Null	TRINITY_GG_894_c0_g1_i1
g15035.t1	(pident:41.421) XP_039760442.1 uncharacterized protein LOC120634116 [Pararge aegeria]	(pident:40.42) uncharacterized protein LOC120634116 [Pararge aegeria]	(pident:41.18) hypothetical protein, partial [Acinetobacter baumannii]	Null	GO:0003676(nucleic acid binding), GO:0008270(zinc ion binding)	IPR036875(Zinc finger, CCHC-type superfamily),IPR001878(Zinc finger, CCHC-type)	PF00098(Zinc knuckle)	Null	Null	Null	Null	Null	Null	TRINITY_GG_894_c0_g1_i1
g15039.t1	(pident:39.085) XP_039760442.1 uncharacterized protein LOC120634116 [Pararge aegeria]	(pident:40.96) uncharacterized protein LOC120634116 [Pararge aegeria]	(pident:46.20) hypothetical protein, partial [Acinetobacter baumannii]	Null	Null	Null	Null	Null	Null	Null	Null	Null	Null	TRINITY_GG_894_c0_g1_i1
g16805.t1	(pident:32.177) XP_045535470.1 uncharacterized protein LOC123721270 [Papilio machaon]	(pident:29.45) axoneme-associated protein mst101(2)-like [Papilio machaon]	Null	Null	Null	Null	Null	Null	Null	Null	Null	Null	Null	TRINITY_GG_894_c0_g1_i1
g21073.t1	(pident:45.205) XP_039761291.1 uncharacterized protein LOC120634623 [Pararge aegeria]	(pident:47.28) hypothetical protein B5V51_10841, partial [Heliothis virescens]	(pident:37.01) hypothetical protein [Pseudomonas aeruginosa]	Null	GO:0003676(nucleic acid binding), GO:0008270(zinc ion binding)	IPR036875(Zinc finger, CCHC-type superfamily),IPR001878(Zinc finger, CCHC-type)	Null	Null	Null	Null	Null	Null	Null	TRINITY_GG_894_c0_g1_i1
g21283.t1	(pident:45.627) XP_045535743.1 uncharacterized protein LOC106719018 [Papilio machaon]	(pident:46.40) uncharacterized protein LOC106719018 [Papilio machaon]	(pident:56.39) endonuclease/exonuclease/phosphatase family protein [Pseudomonas aeruginosa]	(pident:27.380) Full=Retrovirus-related Pol polyprotein from type-1 retrotransposable element R1; AltName: Full=Retrovirus-related Pol polyprotein from type I retrotransposable element R1; Includes: Full=Reverse transcriptase; Includes: Full=Endonuclease [Bradysia coprophila]	GO:0003676(nucleic acid binding), GO:0003824(catalytic activity), GO:0008270(zinc ion binding)	IPR043502(DNA/RNA polymerase superfamily),IPR036875(Zinc finger, CCHC-type superfamily),IPR036691(Endonuclease/exonuclease/phosphatase superfamily),IPR005135(Endonuclease/exonuclease/phosphatase),IPR001878(Zinc finger, CCHC-type),IPR000477(Reverse transcriptase domain)	PF00078(Reverse transcriptase (RNA-dependent DNA polymerase)), PF00098(Zinc knuckle), PF14529(Endonuclease-reverse transcriptase)	Null	Null	Null	Null	Null	Null	TRINITY_GG_894_c0_g1_i1
g21337.t1	(pident:39.866) XP_039761322.1 uncharacterized protein LOC120634657 [Pararge aegeria]	(pident:40.89) uncharacterized protein LOC120634116 [Pararge aegeria]	(pident:43.20) hypothetical protein, partial [Acinetobacter baumannii]	Null	Null	Null	Null	Null	Null	Null	Null	Null	Null	TRINITY_GG_894_c0_g1_i1
g22443.t1	(pident:43.907) XP_039761821.1 uncharacterized protein LOC120634984 [Pararge aegeria]	(pident:45.58) uncharacterized protein LOC120634116 [Pararge aegeria]	(pident:44.87) hypothetical protein [Pseudomonas aeruginosa]	Null	GO:0003676(nucleic acid binding), GO:0008270(zinc ion binding)	IPR036875(Zinc finger, CCHC-type superfamily),IPR001878(Zinc finger, CCHC-type)	PF00098(Zinc knuckle)	Null	Null	Null	Null	Null	Null	TRINITY_GG_894_c0_g1_i1
g22538.t1	Null	Null	Null	Null	Null	Null	Null	Null	Null	Null	Null	Null	Null	TRINITY_GG_894_c0_g1_i1
g22558.t1	(pident:34.954) XP_014365991.2 uncharacterized protein LOC106716864 [Papilio machaon]	(pident:34.90) uncharacterized protein LOC120634116 [Pararge aegeria]	(pident:41.71) hypothetical protein [Pseudomonas aeruginosa]	Null	Null	Null	Null	Null	Null	Null	Null	Null	Null	TRINITY_GG_894_c0_g1_i1
g22921.t1	(pident:43.939) XP_039761821.1 uncharacterized protein LOC120634984 [Pararge aegeria]	(pident:45.76) uncharacterized protein LOC120634116 [Pararge aegeria]	(pident:45.73) hypothetical protein [Pseudomonas aeruginosa]	Null	GO:0003676(nucleic acid binding), GO:0008270(zinc ion binding)	IPR036875(Zinc finger, CCHC-type superfamily),IPR001878(Zinc finger, CCHC-type)	PF00098(Zinc knuckle)	Null	Null	Null	Null	Null	Null	TRINITY_GG_894_c0_g1_i1
g2389.t1	(pident:35.492) XP_039761322.1 uncharacterized protein LOC120634657 [Pararge aegeria]	(pident:37.06) uncharacterized protein LOC120634657 [Pararge aegeria]	(pident:57.95) endonuclease/exonuclease/phosphatase family protein, partial [Pseudomonas aeruginosa]	Null	GO:0003824(catalytic activity)	IPR036691(Endonuclease/exonuclease/phosphatase superfamily),IPR005135(Endonuclease/exonuclease/phosphatase)	PF14529(Endonuclease-reverse transcriptase)	Null	Null	Null	Null	Null	Null	TRINITY_GG_894_c0_g1_i1
g2407.t1	(pident:42.689) XP_039760442.1 uncharacterized protein LOC120634116 [Pararge aegeria]	(pident:44.44) uncharacterized protein LOC120634116 [Pararge aegeria]	(pident:46.91) hypothetical protein [Pseudomonas aeruginosa]	Null	GO:0003676(nucleic acid binding), GO:0008270(zinc ion binding)	IPR036875(Zinc finger, CCHC-type superfamily),IPR001878(Zinc finger, CCHC-type)	PF00098(Zinc knuckle)	Null	Null	Null	Null	Null	Null	TRINITY_GG_894_c0_g1_i1
g24158.t1	(pident:43.202) XP_026746912.1 uncharacterized protein LOC113508150 [Trichoplusia ni]	(pident:47.28) uncharacterized protein LOC120634116 [Pararge aegeria]	(pident:46.99) hypothetical protein [Pseudomonas aeruginosa]	Null	GO:0003676(nucleic acid binding), GO:0008270(zinc ion binding)	IPR036875(Zinc finger, CCHC-type superfamily),IPR001878(Zinc finger, CCHC-type)	PF00098(Zinc knuckle)	Null	Null	Null	Null	Osca011635.1 Putative uncharacterized protein	Null	TRINITY_GG_894_c0_g1_i1
g24302.t1	(pident:40.848) XP_039761821.1 uncharacterized protein LOC120634984 [Pararge aegeria]	(pident:61.36) hypothetical protein B5X24_HaOG207974 [Helicoverpa armigera]	(pident:42.91) hypothetical protein [Pseudomonas aeruginosa]	Null	GO:0003676(nucleic acid binding), GO:0008270(zinc ion binding)	IPR036875(Zinc finger, CCHC-type superfamily),IPR001878(Zinc finger, CCHC-type)	PF00098(Zinc knuckle)	Null	Null	Null	Null	Sfru002816.1 Transposon Tf2-12 polyprotein OS=Schizosaccharomyces pombe (strain 972 / ATCC 24843) OX=284812 GN=Tf2-12 PE=3 SV=1	Null	TRINITY_GG_894_c0_g1_i1
g26222.t1	(pident:36.420) XP_037871371.1 titin homolog [Bombyx mori]	(pident:32.00) actin cytoskeleton-regulatory complex protein PAN1-like [Bombyx mori]	(pident:47.06) hypothetical protein, partial [Pseudomonas aeruginosa]	Null	Null	Null	Null	Null	Null	Null	Null	Null	Null	TRINITY_GG_894_c0_g1_i1
g26444.t1	(pident:42.479) XP_039761821.1 uncharacterized protein LOC120634984 [Pararge aegeria]	(pident:44.02) uncharacterized protein LOC120634116 [Pararge aegeria]	(pident:47.24) hypothetical protein [Pseudomonas aeruginosa]	Null	GO:0003676(nucleic acid binding), GO:0008270(zinc ion binding)	IPR036875(Zinc finger, CCHC-type superfamily),IPR001878(Zinc finger, CCHC-type)	PF00098(Zinc knuckle)	Null	Null	Null	Null	Null	Null	TRINITY_GG_894_c0_g1_i1
g26762.t1	(pident:41.941) XP_039760442.1 uncharacterized protein LOC120634116 [Pararge aegeria]	(pident:42.98) uncharacterized protein LOC120634116 [Pararge aegeria]	(pident:43.78) hypothetical protein [Pseudomonas aeruginosa]	Null	GO:0003676(nucleic acid binding), GO:0008270(zinc ion binding)	IPR036875(Zinc finger, CCHC-type superfamily),IPR001878(Zinc finger, CCHC-type)	Null	Null	Null	Null	Null	Null	Null	TRINITY_GG_894_c0_g1_i1
g273.t1	(pident:42.982) XP_039760442.1 uncharacterized protein LOC120634116 [Pararge aegeria]	(pident:45.16) uncharacterized protein LOC123722921 [Papilio machaon]	Null	Null	Null	Null	Null	Null	Null	Null	Null	Edef009417.1 Putative uncharacterized protein	Null	TRINITY_GG_894_c0_g1_i1
g27663.t1	(pident:42.479) XP_039761486.1 uncharacterized protein LOC120634778 [Pararge aegeria]	(pident:42.98) uncharacterized protein LOC120634116 [Pararge aegeria]	(pident:46.41) hypothetical protein [Pseudomonas aeruginosa]	Null	GO:0003676(nucleic acid binding), GO:0008270(zinc ion binding)	IPR036875(Zinc finger, CCHC-type superfamily),IPR001878(Zinc finger, CCHC-type)	PF00098(Zinc knuckle)	Null	Null	Null	Null	Null	Null	TRINITY_GG_894_c0_g1_i1
g27810.t1	(pident:50.000) XP_022825480.1 uncharacterized protein LOC111355684 [Spodoptera litura]	Null	Null	Null	Null	Null	Null	Null	Null	Null	Null	Null	Null	TRINITY_GG_894_c0_g1_i1
g27879.t1	(pident:41.914) XP_039761821.1 uncharacterized protein LOC120634984 [Pararge aegeria]	(pident:43.51) uncharacterized protein LOC120634116 [Pararge aegeria]	(pident:45.67) hypothetical protein [Pseudomonas aeruginosa]	Null	GO:0003676(nucleic acid binding), GO:0008270(zinc ion binding)	IPR036875(Zinc finger, CCHC-type superfamily),IPR001878(Zinc finger, CCHC-type)	PF00098(Zinc knuckle)	Null	Null	Null	Null	Null	Null	TRINITY_GG_894_c0_g1_i1
g28385.t1	(pident:36.517) XP_039760442.1 uncharacterized protein LOC120634116 [Pararge aegeria]	(pident:37.58) uncharacterized protein LOC120634116 [Pararge aegeria]	(pident:47.75) hypothetical protein, partial [Acinetobacter baumannii]	Null	Null	Null	Null	Null	Null	Null	Null	Null	Null	TRINITY_GG_894_c0_g1_i1
g30291.t1	(pident:38.976) XP_039761322.1 uncharacterized protein LOC120634657 [Pararge aegeria]	(pident:41.25) uncharacterized protein LOC120634657 [Pararge aegeria]	Null	Null	Null	Null	Null	Null	Null	Null	Null	Null	Null	TRINITY_GG_894_c0_g1_i1
g30522.t1	(pident:36.667) XP_037871371.1 titin homolog [Bombyx mori]	(pident:36.15) PREDICTED: uncharacterized protein LOC106114549 [Papilio xuthus]	Null	Null	Null	Null	Null	Null	Null	Null	Null	Null	Null	TRINITY_GG_894_c0_g1_i1
g30526.t1	(pident:44.073) XP_039761821.1 uncharacterized protein LOC120634984 [Pararge aegeria]	(pident:45.76) uncharacterized protein LOC120634116 [Pararge aegeria]	(pident:44.87) hypothetical protein [Pseudomonas aeruginosa]	Null	GO:0003676(nucleic acid binding), GO:0008270(zinc ion binding)	IPR036875(Zinc finger, CCHC-type superfamily),IPR001878(Zinc finger, CCHC-type)	PF00098(Zinc knuckle)	Null	Null	Null	Null	Null	Null	TRINITY_GG_894_c0_g1_i1
g30536.t1	(pident:40.675) XP_039760442.1 uncharacterized protein LOC120634116 [Pararge aegeria]	(pident:39.89) uncharacterized protein LOC120634116 [Pararge aegeria]	(pident:45.38) hypothetical protein [Pseudomonas aeruginosa]	Null	GO:0003676(nucleic acid binding), GO:0008270(zinc ion binding)	IPR036875(Zinc finger, CCHC-type superfamily),IPR001878(Zinc finger, CCHC-type)	Null	Null	Null	Null	Null	Null	Null	TRINITY_GG_894_c0_g1_i1
g30854.t1	(pident:42.114) XP_039761821.1 uncharacterized protein LOC120634984 [Pararge aegeria]	(pident:44.37) uncharacterized protein LOC120634116 [Pararge aegeria]	(pident:47.35) hypothetical protein [Pseudomonas aeruginosa]	Null	GO:0003676(nucleic acid binding), GO:0008270(zinc ion binding)	IPR036875(Zinc finger, CCHC-type superfamily),IPR001878(Zinc finger, CCHC-type)	PF00098(Zinc knuckle)	Null	Null	Null	Null	Null	Null	TRINITY_GG_894_c0_g1_i1
g3101.t1	(pident:32.338) XP_045535060.1 uncharacterized protein LOC123721206 [Papilio machaon]	Null	Null	Null	Null	Null	Null	Null	Null	Null	Null	Null	Null	TRINITY_GG_894_c0_g1_i1
g32786.t1	(pident:43.448) XP_039760442.1 uncharacterized protein LOC120634116 [Pararge aegeria]	(pident:44.14) uncharacterized protein LOC120634116 [Pararge aegeria]	(pident:47.24) hypothetical protein [Pseudomonas aeruginosa]	Null	GO:0003676(nucleic acid binding), GO:0008270(zinc ion binding)	IPR036875(Zinc finger, CCHC-type superfamily),IPR001878(Zinc finger, CCHC-type)	PF00098(Zinc knuckle)	Null	Null	Null	Null	Null	Null	TRINITY_GG_894_c0_g1_i1
g32795.t1	(pident:35.751) XP_039761322.1 uncharacterized protein LOC120634657 [Pararge aegeria]	(pident:38.73) uncharacterized protein LOC120634657 [Pararge aegeria]	Null	Null	Null	Null	Null	Null	Null	Null	Null	Null	Null	TRINITY_GG_894_c0_g1_i1
g32803.t1	(pident:43.824) XP_039760442.1 uncharacterized protein LOC120634116 [Pararge aegeria]	(pident:44.93) uncharacterized protein LOC120634116 [Pararge aegeria]	(pident:47.39) hypothetical protein [Pseudomonas aeruginosa]	Null	GO:0003676(nucleic acid binding), GO:0008270(zinc ion binding)	IPR036875(Zinc finger, CCHC-type superfamily),IPR001878(Zinc finger, CCHC-type)	PF00098(Zinc knuckle)	Null	Null	Null	Null	Null	Null	TRINITY_GG_894_c0_g1_i1
g32811.t1	(pident:41.500) XP_039761821.1 uncharacterized protein LOC120634984 [Pararge aegeria]	(pident:43.71) uncharacterized protein LOC120634116 [Pararge aegeria]	(pident:45.78) hypothetical protein [Pseudomonas aeruginosa]	Null	GO:0003676(nucleic acid binding), GO:0008270(zinc ion binding)	IPR036875(Zinc finger, CCHC-type superfamily),IPR001878(Zinc finger, CCHC-type)	PF00098(Zinc knuckle)	Null	Null	Null	Null	Null	Null	TRINITY_GG_894_c0_g1_i1
g32821.t1	(pident:44.071) XP_039760442.1 uncharacterized protein LOC120634116 [Pararge aegeria]	(pident:41.63) uncharacterized protein LOC120634116 [Pararge aegeria]	(pident:48.72) hypothetical protein [Pseudomonas aeruginosa]	Null	GO:0003676(nucleic acid binding), GO:0008270(zinc ion binding)	IPR036875(Zinc finger, CCHC-type superfamily),IPR001878(Zinc finger, CCHC-type)	PF00098(Zinc knuckle)	Null	Null	Null	Null	Null	Null	TRINITY_GG_894_c0_g1_i1
g34642.t1	(pident:39.563) XP_039760442.1 uncharacterized protein LOC120634116 [Pararge aegeria]	(pident:39.74) uncharacterized protein LOC120634116 [Pararge aegeria]	(pident:49.59) hypothetical protein, partial [Pseudomonas aeruginosa]	Null	Null	Null	Null	Null	Null	Null	Null	Null	Null	TRINITY_GG_894_c0_g1_i1
g34649.t1	(pident:44.073) XP_039761821.1 uncharacterized protein LOC120634984 [Pararge aegeria]	(pident:45.76) uncharacterized protein LOC120634116 [Pararge aegeria]	(pident:44.87) hypothetical protein [Pseudomonas aeruginosa]	Null	GO:0003676(nucleic acid binding), GO:0008270(zinc ion binding)	IPR036875(Zinc finger, CCHC-type superfamily),IPR001878(Zinc finger, CCHC-type)	PF00098(Zinc knuckle)	Null	Null	Null	Null	Null	Null	TRINITY_GG_894_c0_g1_i1
g34693.t1	Null	Null	Null	Null	Null	Null	Null	Null	Null	Null	Null	Null	Null	TRINITY_GG_894_c0_g1_i1
g35109.t1	(pident:42.479) XP_039761821.1 uncharacterized protein LOC120634984 [Pararge aegeria]	(pident:44.02) uncharacterized protein LOC120634116 [Pararge aegeria]	(pident:46.85) hypothetical protein [Pseudomonas aeruginosa]	Null	GO:0003676(nucleic acid binding), GO:0008270(zinc ion binding)	IPR036875(Zinc finger, CCHC-type superfamily),IPR001878(Zinc finger, CCHC-type)	PF00098(Zinc knuckle)	Null	Null	Null	Null	Null	Null	TRINITY_GG_894_c0_g1_i1
g35835.t1	(pident:42.479) XP_039761486.1 uncharacterized protein LOC120634778 [Pararge aegeria]	(pident:43.67) uncharacterized protein LOC120634116 [Pararge aegeria]	(pident:45.67) hypothetical protein [Pseudomonas aeruginosa]	Null	GO:0003676(nucleic acid binding), GO:0008270(zinc ion binding)	IPR036875(Zinc finger, CCHC-type superfamily),IPR001878(Zinc finger, CCHC-type)	PF00098(Zinc knuckle)	Null	Null	Null	Null	Null	Null	TRINITY_GG_894_c0_g1_i1
g35889.t1	(pident:45.229) XP_045535743.1 uncharacterized protein LOC106719018 [Papilio machaon]	(pident:45.11) uncharacterized protein LOC106719018 [Papilio machaon]	(pident:55.96) endonuclease/exonuclease/phosphatase family protein [Pseudomonas aeruginosa]	(pident:27.312) Full=Retrovirus-related Pol polyprotein from type-1 retrotransposable element R1; AltName: Full=Retrovirus-related Pol polyprotein from type I retrotransposable element R1; Includes: Full=Reverse transcriptase; Includes: Full=Endonuclease [Bradysia coprophila]	GO:0003676(nucleic acid binding), GO:0003824(catalytic activity), GO:0008270(zinc ion binding)	IPR043502(DNA/RNA polymerase superfamily),IPR036875(Zinc finger, CCHC-type superfamily),IPR036691(Endonuclease/exonuclease/phosphatase superfamily),IPR005135(Endonuclease/exonuclease/phosphatase),IPR001878(Zinc finger, CCHC-type),IPR000477(Reverse transcriptase domain)	PF00078(Reverse transcriptase (RNA-dependent DNA polymerase)), PF14529(Endonuclease-reverse transcriptase)	Null	Null	Null	Null	Null	Null	TRINITY_GG_894_c0_g1_i1
g36121.t1	(pident:43.783) XP_039760442.1 uncharacterized protein LOC120634116 [Pararge aegeria]	(pident:44.72) uncharacterized protein LOC120634116 [Pararge aegeria]	(pident:44.26) hypothetical protein [Pseudomonas aeruginosa]	Null	GO:0003676(nucleic acid binding), GO:0008270(zinc ion binding)	IPR036875(Zinc finger, CCHC-type superfamily),IPR001878(Zinc finger, CCHC-type)	PF00098(Zinc knuckle)	Null	Null	Null	Null	Null	Null	TRINITY_GG_894_c0_g1_i1
g36384.t1	(pident:41.732) XP_013166398.1 PREDICTED: uncharacterized protein LOC106116885 [Papilio xuthus]	Null	Null	Null	Null	Null	Null	Null	Null	Null	Null	Null	Null	TRINITY_GG_894_c0_g1_i1
g36611.t1	(pident:35.897) XP_039761322.1 uncharacterized protein LOC120634657 [Pararge aegeria]	(pident:32.32) titin homolog [Bombyx mori]	(pident:44.54) hypothetical protein, partial [Pseudomonas aeruginosa]	Null	Null	Null	Null	Null	Null	Null	Null	Null	Null	TRINITY_GG_894_c0_g1_i1
g36627.t1	(pident:44.279) XP_039761821.1 uncharacterized protein LOC120634984 [Pararge aegeria]	(pident:43.47) uncharacterized protein LOC120634116 [Pararge aegeria]	(pident:46.75) hypothetical protein [Pseudomonas aeruginosa]	Null	GO:0003676(nucleic acid binding), GO:0008270(zinc ion binding)	IPR036875(Zinc finger, CCHC-type superfamily),IPR001878(Zinc finger, CCHC-type)	PF00098(Zinc knuckle)	Null	Null	Null	Null	Null	Null	TRINITY_GG_894_c0_g1_i1
g36988.t1	(pident:42.645) XP_039761486.1 uncharacterized protein LOC120634778 [Pararge aegeria]	(pident:43.85) uncharacterized protein LOC120634116 [Pararge aegeria]	(pident:45.67) hypothetical protein [Pseudomonas aeruginosa]	Null	GO:0003676(nucleic acid binding), GO:0008270(zinc ion binding)	IPR036875(Zinc finger, CCHC-type superfamily),IPR001878(Zinc finger, CCHC-type)	PF00098(Zinc knuckle)	Null	Null	Null	Null	Null	Null	TRINITY_GG_894_c0_g1_i1
g4714.t1	(pident:41.597) XP_039761821.1 uncharacterized protein LOC120634984 [Pararge aegeria]	(pident:42.79) uncharacterized protein LOC120634984 [Pararge aegeria]	(pident:47.35) hypothetical protein [Pseudomonas aeruginosa]	Null	GO:0003676(nucleic acid binding), GO:0008270(zinc ion binding)	IPR036875(Zinc finger, CCHC-type superfamily),IPR001878(Zinc finger, CCHC-type)	PF00098(Zinc knuckle)	Null	Null	Null	Null	Null	Null	TRINITY_GG_894_c0_g1_i1
g4719.t1	(pident:46.922) XP_026741398.1 uncharacterized protein LOC113503567 [Trichoplusia ni]	(pident:45.25) uncharacterized protein LOC113503567 [Trichoplusia ni]	(pident:51.04) endonuclease/exonuclease/phosphatase family protein, partial [Acinetobacter baumannii]	Null	GO:0003676(nucleic acid binding), GO:0003824(catalytic activity), GO:0008270(zinc ion binding)	IPR036875(Zinc finger, CCHC-type superfamily),IPR036691(Endonuclease/exonuclease/phosphatase superfamily),IPR005135(Endonuclease/exonuclease/phosphatase),IPR001878(Zinc finger, CCHC-type)	PF00098(Zinc knuckle), PF14529(Endonuclease-reverse transcriptase)	Null	Null	Null	Null	Null	Null	TRINITY_GG_894_c0_g1_i1
g4727.t1	(pident:42.774) XP_039761821.1 uncharacterized protein LOC120634984 [Pararge aegeria]	(pident:44.00) uncharacterized protein LOC120634116 [Pararge aegeria]	(pident:47.48) hypothetical protein [Pseudomonas aeruginosa]	Null	GO:0003676(nucleic acid binding), GO:0008270(zinc ion binding)	IPR036875(Zinc finger, CCHC-type superfamily),IPR001878(Zinc finger, CCHC-type)	PF00098(Zinc knuckle)	Null	Null	Null	Null	Null	Null	TRINITY_GG_894_c0_g1_i1
g5802.t1	(pident:41.833) XP_039761821.1 uncharacterized protein LOC120634984 [Pararge aegeria]	(pident:44.23) uncharacterized protein LOC120634116 [Pararge aegeria]	(pident:47.41) hypothetical protein [Pseudomonas aeruginosa]	Null	GO:0003676(nucleic acid binding), GO:0008270(zinc ion binding)	IPR036875(Zinc finger, CCHC-type superfamily),IPR001878(Zinc finger, CCHC-type)	PF00098(Zinc knuckle)	Null	Null	Null	Null	Null	Null	TRINITY_GG_894_c0_g1_i1
g6262.t1	(pident:45.392) XP_045535743.1 uncharacterized protein LOC106719018 [Papilio machaon]	(pident:46.16) uncharacterized protein LOC106719018 [Papilio machaon]	(pident:56.26) endonuclease/exonuclease/phosphatase family protein [Pseudomonas aeruginosa]	(pident:27.380) Full=Retrovirus-related Pol polyprotein from type-1 retrotransposable element R1; AltName: Full=Retrovirus-related Pol polyprotein from type I retrotransposable element R1; Includes: Full=Reverse transcriptase; Includes: Full=Endonuclease [Bradysia coprophila]	GO:0003676(nucleic acid binding), GO:0003824(catalytic activity), GO:0008270(zinc ion binding)	IPR043502(DNA/RNA polymerase superfamily),IPR036875(Zinc finger, CCHC-type superfamily),IPR036691(Endonuclease/exonuclease/phosphatase superfamily),IPR005135(Endonuclease/exonuclease/phosphatase),IPR001878(Zinc finger, CCHC-type),IPR000477(Reverse transcriptase domain)	PF00078(Reverse transcriptase (RNA-dependent DNA polymerase)), PF00098(Zinc knuckle), PF14529(Endonuclease-reverse transcriptase)	Null	Null	Null	Null	Null	Null	TRINITY_GG_894_c0_g1_i1
g6942.t1	(pident:41.946) XP_039761821.1 uncharacterized protein LOC120634984 [Pararge aegeria]	(pident:44.19) uncharacterized protein LOC120634116 [Pararge aegeria]	(pident:46.94) hypothetical protein [Pseudomonas aeruginosa]	Null	GO:0003676(nucleic acid binding), GO:0008270(zinc ion binding)	IPR036875(Zinc finger, CCHC-type superfamily),IPR001878(Zinc finger, CCHC-type)	PF00098(Zinc knuckle)	Null	Null	Null	Null	Null	Null	TRINITY_GG_894_c0_g1_i1
g8094.t1	(pident:42.975) XP_039761486.1 uncharacterized protein LOC120634778 [Pararge aegeria]	(pident:44.54) uncharacterized protein LOC120634116 [Pararge aegeria]	(pident:47.24) hypothetical protein [Pseudomonas aeruginosa]	Null	GO:0003676(nucleic acid binding), GO:0008270(zinc ion binding)	IPR036875(Zinc finger, CCHC-type superfamily),IPR001878(Zinc finger, CCHC-type)	PF00098(Zinc knuckle)	Null	Null	Null	Null	Null	Null	TRINITY_GG_894_c0_g1_i1
g8909.t1	(pident:43.621) XP_039760442.1 uncharacterized protein LOC120634116 [Pararge aegeria]	(pident:44.37) uncharacterized protein LOC120634116 [Pararge aegeria]	(pident:47.24) hypothetical protein [Pseudomonas aeruginosa]	Null	GO:0003676(nucleic acid binding), GO:0008270(zinc ion binding)	IPR036875(Zinc finger, CCHC-type superfamily),IPR001878(Zinc finger, CCHC-type)	PF00098(Zinc knuckle)	Null	Null	Null	Null	Null	Null	TRINITY_GG_894_c0_g1_i1
g21934.t1	(pident:60.579) XP_026316238.1 methionine--tRNA ligase, cytoplasmic [Hyposmocoma kahamanoa]	(pident:61.74) hypothetical protein JYU34_001239 [Plutella xylostella]	(pident:64.77) methionine--tRNA ligase [Alkalispirochaeta odontotermitis]	(pident:43.966) Full=Methionine--tRNA ligase, cytoplasmic; AltName: Full=Methionyl-tRNA synthetase; Short=MetRS [Xenopus laevis]	GO:0000166(nucleotide binding), GO:0004812(aminoacyl-tRNA ligase activity), GO:0004825(methionine-tRNA ligase activity), GO:0005524(ATP binding), GO:0006418(tRNA aminoacylation for protein translation), GO:0006431(methionyl-tRNA aminoacylation)	IPR041598(Methionine--tRNA ligase, N-terminal),IPR036282(Glutathione S-transferase, C-terminal domain superfamily),IPR033911(Methioninyl-tRNA synthetase core domain),IPR029038(Methionyl-tRNA synthetase, Zn-domain),IPR023458(Methionine-tRNA ligase, type 1),IPR015413(Methionyl/Leucyl tRNA synthetase),IPR014729(Rossmann-like alpha/beta/alpha sandwich fold),IPR010987(Glutathione S-transferase, C-term…	PF09334(tRNA synthetases class I (M)), PF18485(Glutathione S-transferase, N-terminal domain)	Null	5GL7_A Crystal structure of a truncated human cytosolic methionyl-tRNA synthetase [Homo sapiens] /5GOY_A The crystal structure of human cytosolic methionyl-tRNA synthetase in complex with methionine [Homo sapiens]	Null	QKX55086.1 hypothetical protein TRUGW13939_02178 [Talaromyces rugulosus]	Hkah001485.1 Methionine--tRNA ligase, cytoplasmic OS=Bos taurus OX=9913 GN=MARS1 PE=2 SV=1	Null	TRINITY_GG_892_c0_g2_i1
g10079.t1	Null	Null	Null	Null	Null	Null	Null	Null	Null	Null	Null	Null	Null	TRINITY_GG_890_c0_g1_i1
g10169.t1	(pident:58.011) XP_026741398.1 uncharacterized protein LOC113503567 [Trichoplusia ni]	(pident:58.01) uncharacterized protein LOC113503567 [Trichoplusia ni]	(pident:53.04) endonuclease/exonuclease/phosphatase family protein, partial [Acinetobacter baumannii]	(pident:27.236) Full=Retrovirus-related Pol polyprotein from type-1 retrotransposable element R1; AltName: Full=Retrovirus-related Pol polyprotein from type I retrotransposable element R1; Includes: Full=Reverse transcriptase; Includes: Full=Endonuclease [Bradysia coprophila]	GO:0003824(catalytic activity)	IPR036691(Endonuclease/exonuclease/phosphatase superfamily),IPR005135(Endonuclease/exonuclease/phosphatase)	PF14529(Endonuclease-reverse transcriptase)	Null	Null	Null	Null	Aper011878.1 Probable RNA-directed DNA polymerase from transposon BS OS=Drosophila melanogaster OX=7227 GN=RTase PE=2 SV=1	Null	TRINITY_GG_890_c0_g1_i1
g10175.t1	(pident:57.115) CAB3223826.1 unnamed protein product [Arctia plantaginis]	(pident:56.14) unnamed protein product [Arctia plantaginis]	(pident:56.07) endonuclease/exonuclease/phosphatase family protein [Pseudomonas aeruginosa]	(pident:27.744) Full=Putative 115 kDa protein in type-1 retrotransposable element R1DM; AltName: Full=ORF 2; AltName: Full=Putative 115 kDa protein in type I retrotransposable element R1DM [Drosophila melanogaster]	GO:0003824(catalytic activity)	IPR043502(DNA/RNA polymerase superfamily),IPR036691(Endonuclease/exonuclease/phosphatase superfamily),IPR005135(Endonuclease/exonuclease/phosphatase),IPR000477(Reverse transcriptase domain)	PF00078(Reverse transcriptase (RNA-dependent DNA polymerase)), PF14529(Endonuclease-reverse transcriptase)	Null	Null	Null	Null	Aper019265.1 Probable RNA-directed DNA polymerase from transposon BS OS=Drosophila melanogaster OX=7227 GN=RTase PE=2 SV=1	Null	TRINITY_GG_890_c0_g1_i1
g10189.t1	(pident:52.058) XP_026741398.1 uncharacterized protein LOC113503567 [Trichoplusia ni]	(pident:52.06) uncharacterized protein LOC113503567 [Trichoplusia ni]	(pident:47.72) endonuclease/exonuclease/phosphatase family protein, partial [Acinetobacter baumannii]	Null	GO:0003824(catalytic activity)	IPR036691(Endonuclease/exonuclease/phosphatase superfamily),IPR005135(Endonuclease/exonuclease/phosphatase)	PF14529(Endonuclease-reverse transcriptase)	Null	Null	Null	Null	Aper020384.1 Probable RNA-directed DNA polymerase from transposon BS OS=Drosophila melanogaster OX=7227 GN=RTase PE=2 SV=1	Null	TRINITY_GG_890_c0_g1_i1
g10191.t1	Null	Null	Null	Null	Null	Null	Null	Null	Null	Null	Null	Null	Null	TRINITY_GG_890_c0_g1_i1
g10195.t1	Null	Null	Null	Null	Null	Null	Null	Null	Null	Null	Null	Null	Null	TRINITY_GG_890_c0_g1_i1
g10196.t1	(pident:51.751) CAB3260646.1 unnamed protein product [Arctia plantaginis]	(pident:51.30) unnamed protein product [Arctia plantaginis]	(pident:51.60) endonuclease/exonuclease/phosphatase family protein [Pseudomonas aeruginosa]	(pident:30.298) Full=Retrovirus-related Pol polyprotein from type-1 retrotransposable element R1; AltName: Full=Retrovirus-related Pol polyprotein from type I retrotransposable element R1; Includes: Full=Reverse transcriptase; Includes: Full=Endonuclease [Bradysia coprophila]	Null	IPR043502(DNA/RNA polymerase superfamily),IPR036691(Endonuclease/exonuclease/phosphatase superfamily),IPR000477(Reverse transcriptase domain)	PF00078(Reverse transcriptase (RNA-dependent DNA polymerase))	Null	Null	Null	Null	Aper019265.1 Probable RNA-directed DNA polymerase from transposon BS OS=Drosophila melanogaster OX=7227 GN=RTase PE=2 SV=1	Null	TRINITY_GG_890_c0_g1_i1
g10198.t1	(pident:55.396) XP_039761325.1 uncharacterized protein LOC120634659 [Pararge aegeria]	(pident:66.09) uncharacterized protein LOC123879824 [Maniola jurtina]	Null	Null	GO:0003676(nucleic acid binding), GO:0008270(zinc ion binding)	IPR036875(Zinc finger, CCHC-type superfamily),IPR001878(Zinc finger, CCHC-type)	PF00098(Zinc knuckle)	Null	Null	Null	Null	Tbra011512.1 Putative uncharacterized protein	Null	TRINITY_GG_890_c0_g1_i1
g10204.t1	Null	Null	Null	Null	Null	Null	Null	Null	Null	Null	Null	Null	Null	TRINITY_GG_890_c0_g1_i1
g10258.t1	Null	Null	Null	Null	Null	Null	Null	Null	Null	Null	Null	Null	Null	TRINITY_GG_890_c0_g1_i1
g10286.t1	(pident:53.543) XP_026321641.1 uncharacterized protein LOC113231535 [Hyposmocoma kahamanoa]	(pident:53.58) uncharacterized protein LOC113231535 [Hyposmocoma kahamanoa]	(pident:52.09) endonuclease/exonuclease/phosphatase family protein, partial [Acinetobacter baumannii]	(pident:26.452) Full=Retrovirus-related Pol polyprotein from type-1 retrotransposable element R1; AltName: Full=Retrovirus-related Pol polyprotein from type I retrotransposable element R1; Includes: Full=Reverse transcriptase; Includes: Full=Endonuclease [Bradysia coprophila]	GO:0003824(catalytic activity)	IPR036691(Endonuclease/exonuclease/phosphatase superfamily),IPR005135(Endonuclease/exonuclease/phosphatase)	PF14529(Endonuclease-reverse transcriptase)	Null	Null	Null	Null	Aper007149.1 Probable RNA-directed DNA polymerase from transposon BS OS=Drosophila melanogaster OX=7227 GN=RTase PE=2 SV=1	Null	TRINITY_GG_890_c0_g1_i1
g10290.t1	(pident:57.461) CAB3223826.1 unnamed protein product [Arctia plantaginis]	(pident:57.46) endonuclease/exonuclease/phosphatase family protein [Pseudomonas aeruginosa]<>hypothetical protein F3G58_31395 [Pseudomonas aeruginosa]	(pident:57.46) endonuclease/exonuclease/phosphatase family protein [Pseudomonas aeruginosa]	(pident:27.657) Full=Retrovirus-related Pol polyprotein from type-1 retrotransposable element R1; AltName: Full=Retrovirus-related Pol polyprotein from type I retrotransposable element R1; Includes: Full=Reverse transcriptase; Includes: Full=Endonuclease [Bradysia coprophila]	GO:0003824(catalytic activity)	IPR043502(DNA/RNA polymerase superfamily),IPR036691(Endonuclease/exonuclease/phosphatase superfamily),IPR005135(Endonuclease/exonuclease/phosphatase),IPR000477(Reverse transcriptase domain)	PF00078(Reverse transcriptase (RNA-dependent DNA polymerase)), PF14529(Endonuclease-reverse transcriptase)	Null	Null	Null	Null	Aper007149.1 Probable RNA-directed DNA polymerase from transposon BS OS=Drosophila melanogaster OX=7227 GN=RTase PE=2 SV=1	Null	TRINITY_GG_890_c0_g1_i1
g10297.t1	(pident:61.582) XP_032525082.1 uncharacterized protein LOC116776088 [Danaus plexippus plexippus]	(pident:61.58) uncharacterized protein LOC116776088 [Danaus plexippus plexippus]	(pident:59.14) endonuclease/exonuclease/phosphatase family protein, partial [Pseudomonas aeruginosa]	Null	GO:0003824(catalytic activity)	IPR036691(Endonuclease/exonuclease/phosphatase superfamily),IPR005135(Endonuclease/exonuclease/phosphatase)	PF14529(Endonuclease-reverse transcriptase)	Null	Null	Null	Null	Harm012825.1 Probable RNA-directed DNA polymerase from transposon BS OS=Drosophila melanogaster OX=7227 GN=RTase PE=2 SV=1	Null	TRINITY_GG_890_c0_g1_i1
g10301.t1	(pident:57.654) XP_026741398.1 uncharacterized protein LOC113503567 [Trichoplusia ni]	(pident:53.88) uncharacterized protein LOC113503567 [Trichoplusia ni]	(pident:49.06) endonuclease/exonuclease/phosphatase family protein, partial [Acinetobacter baumannii]	(pident:26.952) Full=Putative 115 kDa protein in type-1 retrotransposable element R1DM; AltName: Full=ORF 2; AltName: Full=Putative 115 kDa protein in type I retrotransposable element R1DM [Drosophila melanogaster]	GO:0003676(nucleic acid binding), GO:0003824(catalytic activity), GO:0008270(zinc ion binding)	IPR036875(Zinc finger, CCHC-type superfamily),IPR036691(Endonuclease/exonuclease/phosphatase superfamily),IPR005135(Endonuclease/exonuclease/phosphatase),IPR001878(Zinc finger, CCHC-type)	PF00098(Zinc knuckle), PF14529(Endonuclease-reverse transcriptase)	Null	Null	Null	Null	Aper020384.1 Probable RNA-directed DNA polymerase from transposon BS OS=Drosophila melanogaster OX=7227 GN=RTase PE=2 SV=1	Null	TRINITY_GG_890_c0_g1_i1
g10306.t1	(pident:57.339) XP_026741398.1 uncharacterized protein LOC113503567 [Trichoplusia ni]	(pident:53.62) uncharacterized protein LOC113503567 [Trichoplusia ni]	(pident:49.81) endonuclease/exonuclease/phosphatase family protein, partial [Acinetobacter baumannii]	(pident:27.881) Full=Putative 115 kDa protein in type-1 retrotransposable element R1DM; AltName: Full=ORF 2; AltName: Full=Putative 115 kDa protein in type I retrotransposable element R1DM [Drosophila melanogaster]	GO:0003824(catalytic activity)	IPR036691(Endonuclease/exonuclease/phosphatase superfamily),IPR005135(Endonuclease/exonuclease/phosphatase),IPR000629(ATP-dependent RNA helicase DEAD-box, conserved site)	PF14529(Endonuclease-reverse transcriptase)	Null	Null	Null	Null	Aper020384.1 Probable RNA-directed DNA polymerase from transposon BS OS=Drosophila melanogaster OX=7227 GN=RTase PE=2 SV=1	Null	TRINITY_GG_890_c0_g1_i1
g10345.t1	(pident:40.244) XP_037871588.1 uncharacterized protein LOC119629545 [Bombyx mori]	(pident:38.88) uncharacterized protein LOC113503567 [Trichoplusia ni]	(pident:54.11) endonuclease/exonuclease/phosphatase family protein, partial [Pseudomonas aeruginosa]	Null	GO:0003824(catalytic activity)	IPR036691(Endonuclease/exonuclease/phosphatase superfamily),IPR005135(Endonuclease/exonuclease/phosphatase)	PF14529(Endonuclease-reverse transcriptase)	Null	Null	Null	Null	Null	Null	TRINITY_GG_890_c0_g1_i1
g10569.t1	(pident:57.488) CAB3223826.1 unnamed protein product [Arctia plantaginis]	(pident:57.02) unnamed protein product [Arctia plantaginis]	(pident:56.67) endonuclease/exonuclease/phosphatase family protein [Pseudomonas aeruginosa]	(pident:27.484) Full=Retrovirus-related Pol polyprotein from type-1 retrotransposable element R1; AltName: Full=Retrovirus-related Pol polyprotein from type I retrotransposable element R1; Includes: Full=Reverse transcriptase; Includes: Full=Endonuclease [Bradysia coprophila]	GO:0003824(catalytic activity)	IPR043502(DNA/RNA polymerase superfamily),IPR036691(Endonuclease/exonuclease/phosphatase superfamily),IPR005135(Endonuclease/exonuclease/phosphatase),IPR000477(Reverse transcriptase domain)	PF00078(Reverse transcriptase (RNA-dependent DNA polymerase)), PF14529(Endonuclease-reverse transcriptase)	Null	Null	Null	Null	Osca015777.1 Putative 115 kDa protein in type-1 retrotransposable element R1DM OS=Drosophila melanogaster OX=7227 GN=R1A1-element\ORF2 PE=4 SV=1	Null	TRINITY_GG_890_c0_g1_i1
g10585.t1	Null	Null	Null	Null	Null	Null	Null	Null	Null	Null	Null	Null	Null	TRINITY_GG_890_c0_g1_i1
g10588.t1	(pident:42.204) XP_026746947.1 uncharacterized protein LOC113508189 [Trichoplusia ni]	(pident:41.37) uncharacterized protein LOC113508189 [Trichoplusia ni]	(pident:44.98) endonuclease/exonuclease/phosphatase family protein, partial [Pseudomonas aeruginosa]	Null	GO:0003824(catalytic activity)	IPR036691(Endonuclease/exonuclease/phosphatase superfamily),IPR005135(Endonuclease/exonuclease/phosphatase)	PF14529(Endonuclease-reverse transcriptase)	Null	Null	Null	Null	Null	Null	TRINITY_GG_890_c0_g1_i1
g10594.t1	Null	Null	Null	Null	Null	Null	Null	Null	Null	Null	Null	Null	Null	TRINITY_GG_890_c0_g1_i1
g10597.t1	(pident:56.421) CAB3248307.1 unnamed protein product [Arctia plantaginis]	(pident:57.12) unnamed protein product [Arctia plantaginis]	(pident:54.61) endonuclease/exonuclease/phosphatase family protein [Piscirickettsia salmonis]	(pident:28.323) Full=Putative 115 kDa protein in type-1 retrotransposable element R1DM; AltName: Full=ORF 2; AltName: Full=Putative 115 kDa protein in type I retrotransposable element R1DM [Drosophila melanogaster]	GO:0003824(catalytic activity)	IPR043502(DNA/RNA polymerase superfamily),IPR036691(Endonuclease/exonuclease/phosphatase superfamily),IPR005135(Endonuclease/exonuclease/phosphatase),IPR000477(Reverse transcriptase domain)	PF00078(Reverse transcriptase (RNA-dependent DNA polymerase)), PF14529(Endonuclease-reverse transcriptase)	Null	Null	Null	Null	Aper020384.1 Probable RNA-directed DNA polymerase from transposon BS OS=Drosophila melanogaster OX=7227 GN=RTase PE=2 SV=1	Null	TRINITY_GG_890_c0_g1_i1
g10617.t1	(pident:56.763) XP_026741398.1 uncharacterized protein LOC113503567 [Trichoplusia ni]	(pident:56.76) uncharacterized protein LOC113503567 [Trichoplusia ni]	(pident:49.68) endonuclease/exonuclease/phosphatase family protein, partial [Acinetobacter baumannii]	(pident:25.191) Full=Retrovirus-related Pol polyprotein from type-1 retrotransposable element R1; AltName: Full=Retrovirus-related Pol polyprotein from type I retrotransposable element R1; Includes: Full=Reverse transcriptase; Includes: Full=Endonuclease [Bradysia coprophila]	GO:0003824(catalytic activity)	IPR036691(Endonuclease/exonuclease/phosphatase superfamily),IPR005135(Endonuclease/exonuclease/phosphatase)	PF14529(Endonuclease-reverse transcriptase)	Null	Null	Null	Null	Aper011878.1 Probable RNA-directed DNA polymerase from transposon BS OS=Drosophila melanogaster OX=7227 GN=RTase PE=2 SV=1	Null	TRINITY_GG_890_c0_g1_i1
g10654.t1	(pident:62.205) XP_026741398.1 uncharacterized protein LOC113503567 [Trichoplusia ni]	(pident:59.06) hypothetical protein B5X24_HaOG204786 [Helicoverpa armigera]	(pident:52.48) reverse transcriptase family protein, partial [Acinetobacter baumannii]	(pident:29.706) Full=Putative 115 kDa protein in type-1 retrotransposable element R1DM; AltName: Full=ORF 2; AltName: Full=Putative 115 kDa protein in type I retrotransposable element R1DM [Drosophila melanogaster]	Null	IPR043502(DNA/RNA polymerase superfamily),IPR000477(Reverse transcriptase domain)	PF00078(Reverse transcriptase (RNA-dependent DNA polymerase))	Null	Null	Null	Null	Aper009938.1 Probable RNA-directed DNA polymerase from transposon BS OS=Drosophila melanogaster OX=7227 GN=RTase PE=2 SV=1	Null	TRINITY_GG_890_c0_g1_i1
g10655.t1	Null	Null	Null	Null	Null	Null	Null	Null	Null	Null	Null	Null	Null	TRINITY_GG_890_c0_g1_i1
g10999.t1	(pident:59.445) XP_026741398.1 uncharacterized protein LOC113503567 [Trichoplusia ni]	(pident:56.85) uncharacterized protein LOC113503567 [Trichoplusia ni]	(pident:51.52) endonuclease/exonuclease/phosphatase family protein, partial [Acinetobacter baumannii]	(pident:28.148) Full=Putative 115 kDa protein in type-1 retrotransposable element R1DM; AltName: Full=ORF 2; AltName: Full=Putative 115 kDa protein in type I retrotransposable element R1DM [Drosophila melanogaster]	GO:0003676(nucleic acid binding), GO:0003824(catalytic activity), GO:0008270(zinc ion binding)	IPR043502(DNA/RNA polymerase superfamily),IPR036875(Zinc finger, CCHC-type superfamily),IPR036691(Endonuclease/exonuclease/phosphatase superfamily),IPR005135(Endonuclease/exonuclease/phosphatase),IPR001878(Zinc finger, CCHC-type),IPR000477(Reverse transcriptase domain)	PF00078(Reverse transcriptase (RNA-dependent DNA polymerase)), PF14529(Endonuclease-reverse transcriptase)	Null	Null	Null	Null	Aper020384.1 Probable RNA-directed DNA polymerase from transposon BS OS=Drosophila melanogaster OX=7227 GN=RTase PE=2 SV=1	Null	TRINITY_GG_890_c0_g1_i1
g1107.t1	(pident:36.512) XP_045541436.1 uncharacterized protein LOC123722921 [Papilio machaon]	(pident:37.20) unnamed protein product [Arctia plantaginis]	(pident:34.38) endonuclease/exonuclease/phosphatase family protein, partial [Acinetobacter baumannii]	Null	Null	IPR036691(Endonuclease/exonuclease/phosphatase superfamily)	Null	Null	Null	Null	Null	Null	Null	TRINITY_GG_890_c0_g1_i1
g12553.t1	(pident:43.692) XP_013170469.1 PREDICTED: uncharacterized protein LOC106119888 [Papilio xuthus]	(pident:44.03) PREDICTED: uncharacterized protein LOC106119888 [Papilio xuthus]	(pident:39.17) endonuclease/exonuclease/phosphatase family protein, partial [Acinetobacter baumannii]	Null	GO:0003824(catalytic activity)	IPR036691(Endonuclease/exonuclease/phosphatase superfamily),IPR005135(Endonuclease/exonuclease/phosphatase)	PF14529(Endonuclease-reverse transcriptase)	Null	Null	Null	Null	Null	Null	TRINITY_GG_890_c0_g1_i1
g12902.t1	(pident:54.318) XP_026321641.1 uncharacterized protein LOC113231535 [Hyposmocoma kahamanoa]	(pident:51.25) uncharacterized protein LOC113231535 [Hyposmocoma kahamanoa]	(pident:49.45) endonuclease/exonuclease/phosphatase family protein [Piscirickettsia salmonis]	Null	GO:0003824(catalytic activity)	IPR036691(Endonuclease/exonuclease/phosphatase superfamily),IPR005135(Endonuclease/exonuclease/phosphatase)	PF14529(Endonuclease-reverse transcriptase)	Null	Null	Null	Null	Aper020384.1 Probable RNA-directed DNA polymerase from transposon BS OS=Drosophila melanogaster OX=7227 GN=RTase PE=2 SV=1	Null	TRINITY_GG_890_c0_g1_i1
g12922.t1	Null	Null	Null	Null	Null	Null	Null	Null	Null	Null	Null	Null	Null	TRINITY_GG_890_c0_g1_i1
g12924.t1	(pident:53.735) XP_026321641.1 uncharacterized protein LOC113231535 [Hyposmocoma kahamanoa]	(pident:49.88) uncharacterized protein LOC113231535 [Hyposmocoma kahamanoa]	(pident:47.08) endonuclease/exonuclease/phosphatase family protein, partial [Acinetobacter baumannii]	(pident:25.767) Full=Putative 115 kDa protein in type-1 retrotransposable element R1DM; AltName: Full=ORF 2; AltName: Full=Putative 115 kDa protein in type I retrotransposable element R1DM [Drosophila melanogaster]	GO:0003824(catalytic activity)	IPR036691(Endonuclease/exonuclease/phosphatase superfamily),IPR005135(Endonuclease/exonuclease/phosphatase)	PF14529(Endonuclease-reverse transcriptase)	Null	Null	Null	Null	Aper020384.1 Probable RNA-directed DNA polymerase from transposon BS OS=Drosophila melanogaster OX=7227 GN=RTase PE=2 SV=1	Null	TRINITY_GG_890_c0_g1_i1
g12935.t1	(pident:55.654) XP_026741398.1 uncharacterized protein LOC113503567 [Trichoplusia ni]	(pident:55.65) uncharacterized protein LOC113503567 [Trichoplusia ni]	(pident:49.68) endonuclease/exonuclease/phosphatase family protein, partial [Acinetobacter baumannii]	(pident:27.053) Full=Putative 115 kDa protein in type-1 retrotransposable element R1DM; AltName: Full=ORF 2; AltName: Full=Putative 115 kDa protein in type I retrotransposable element R1DM [Drosophila melanogaster]	GO:0003824(catalytic activity)	IPR036691(Endonuclease/exonuclease/phosphatase superfamily),IPR005135(Endonuclease/exonuclease/phosphatase)	PF14529(Endonuclease-reverse transcriptase)	Null	Null	Null	Null	Aper011878.1 Probable RNA-directed DNA polymerase from transposon BS OS=Drosophila melanogaster OX=7227 GN=RTase PE=2 SV=1	Null	TRINITY_GG_890_c0_g1_i1
g13047.t1	(pident:57.602) CAB3223826.1 unnamed protein product [Arctia plantaginis]	(pident:56.34) unnamed protein product [Arctia plantaginis]	(pident:55.68) endonuclease/exonuclease/phosphatase family protein [Pseudomonas aeruginosa]	(pident:28.327) Full=Putative 115 kDa protein in type-1 retrotransposable element R1DM; AltName: Full=ORF 2; AltName: Full=Putative 115 kDa protein in type I retrotransposable element R1DM [Drosophila melanogaster]	GO:0003824(catalytic activity)	IPR043502(DNA/RNA polymerase superfamily),IPR036691(Endonuclease/exonuclease/phosphatase superfamily),IPR005135(Endonuclease/exonuclease/phosphatase),IPR000477(Reverse transcriptase domain)	PF00078(Reverse transcriptase (RNA-dependent DNA polymerase)), PF14529(Endonuclease-reverse transcriptase)	Null	Null	Null	Null	Aper011878.1 Probable RNA-directed DNA polymerase from transposon BS OS=Drosophila melanogaster OX=7227 GN=RTase PE=2 SV=1	Null	TRINITY_GG_890_c0_g1_i1
g13048.t1	(pident:52.851) XP_026331273.1 uncharacterized protein LOC113238652 [Hyposmocoma kahamanoa]	(pident:56.32) TRAS3 [Bombyx mori]	(pident:70.81) hypothetical protein, partial [Acinetobacter baumannii]	(pident:28.603) Full=Putative 115 kDa protein in type-1 retrotransposable element R1DM; AltName: Full=ORF 2; AltName: Full=Putative 115 kDa protein in type I retrotransposable element R1DM [Drosophila melanogaster]	GO:0003676(nucleic acid binding), GO:0003824(catalytic activity), GO:0004523(RNA-DNA hybrid ribonuclease activity)	IPR043502(DNA/RNA polymerase superfamily),IPR036691(Endonuclease/exonuclease/phosphatase superfamily),IPR036397(Ribonuclease H superfamily),IPR012337(Ribonuclease H-like superfamily),IPR005135(Endonuclease/exonuclease/phosphatase),IPR002156(Ribonuclease H domain),IPR000477(Reverse transcriptase domain)	PF00075(RNase H), PF00078(Reverse transcriptase (RNA-dependent DNA polymerase)), PF14529(Endonuclease-reverse transcriptase)	Null	1WDU_A Chain A, TRAS1 ORF2p [Bombyx mori] /1WDU_B Chain B, TRAS1 ORF2p [Bombyx mori]	Null	Null	Hkah011060.1 Putative 115 kDa protein in type-1 retrotransposable element R1DM OS=Drosophila melanogaster OX=7227 GN=R1A1-element\ORF2 PE=4 SV=1	Null	TRINITY_GG_890_c0_g1_i1
g13224.t1	(pident:59.007) XP_026741398.1 uncharacterized protein LOC113503567 [Trichoplusia ni]	(pident:59.01) uncharacterized protein LOC113503567 [Trichoplusia ni]	(pident:53.48) endonuclease/exonuclease/phosphatase family protein, partial [Acinetobacter baumannii]	(pident:27.846) Full=Retrovirus-related Pol polyprotein from type-1 retrotransposable element R1; AltName: Full=Retrovirus-related Pol polyprotein from type I retrotransposable element R1; Includes: Full=Reverse transcriptase; Includes: Full=Endonuclease [Bradysia coprophila]	GO:0003824(catalytic activity)	IPR043502(DNA/RNA polymerase superfamily),IPR036691(Endonuclease/exonuclease/phosphatase superfamily),IPR005135(Endonuclease/exonuclease/phosphatase)	PF14529(Endonuclease-reverse transcriptase)	Null	Null	Null	Null	Aper011878.1 Probable RNA-directed DNA polymerase from transposon BS OS=Drosophila melanogaster OX=7227 GN=RTase PE=2 SV=1	Null	TRINITY_GG_890_c0_g1_i1
g13490.t1	(pident:57.537) XP_026741398.1 uncharacterized protein LOC113503567 [Trichoplusia ni]	(pident:57.54) uncharacterized protein LOC113503567 [Trichoplusia ni]	(pident:52.05) endonuclease/exonuclease/phosphatase family protein, partial [Acinetobacter baumannii]	(pident:27.846) Full=Retrovirus-related Pol polyprotein from type-1 retrotransposable element R1; AltName: Full=Retrovirus-related Pol polyprotein from type I retrotransposable element R1; Includes: Full=Reverse transcriptase; Includes: Full=Endonuclease [Bradysia coprophila]	GO:0003824(catalytic activity)	IPR036691(Endonuclease/exonuclease/phosphatase superfamily),IPR005135(Endonuclease/exonuclease/phosphatase)	PF14529(Endonuclease-reverse transcriptase)	Null	Null	Null	Null	Aper011878.1 Probable RNA-directed DNA polymerase from transposon BS OS=Drosophila melanogaster OX=7227 GN=RTase PE=2 SV=1	Null	TRINITY_GG_890_c0_g1_i1
g13494.t1	(pident:56.132) CAB3248307.1 unnamed protein product [Arctia plantaginis]	(pident:46.69) unnamed protein product [Arctia plantaginis]	(pident:45.95) endonuclease/exonuclease/phosphatase family protein [Pseudomonas aeruginosa]	(pident:27.377) Full=Putative 115 kDa protein in type-1 retrotransposable element R1DM; AltName: Full=ORF 2; AltName: Full=Putative 115 kDa protein in type I retrotransposable element R1DM [Drosophila melanogaster]	GO:0003824(catalytic activity)	IPR043502(DNA/RNA polymerase superfamily),IPR036691(Endonuclease/exonuclease/phosphatase superfamily),IPR005135(Endonuclease/exonuclease/phosphatase),IPR000477(Reverse transcriptase domain)	PF00078(Reverse transcriptase (RNA-dependent DNA polymerase)), PF14529(Endonuclease-reverse transcriptase)	Null	Null	Null	Null	Null	Null	TRINITY_GG_890_c0_g1_i1
g14891.t1	(pident:56.561) XP_039762050.1 uncharacterized protein LOC120635182, partial [Pararge aegeria]	(pident:56.56) uncharacterized protein LOC120635182, partial [Pararge aegeria]	(pident:53.74) endonuclease/exonuclease/phosphatase family protein, partial [Acinetobacter baumannii]	Null	GO:0003824(catalytic activity)	IPR036691(Endonuclease/exonuclease/phosphatase superfamily),IPR005135(Endonuclease/exonuclease/phosphatase)	PF14529(Endonuclease-reverse transcriptase)	Null	Null	Null	Null	Aper019463.1 Retrovirus-related Pol polyprotein from type-1 retrotransposable element R1 (Fragment) OS=Bradysia coprophila OX=38358 PE=4 SV=1	Null	TRINITY_GG_890_c0_g1_i1
g14892.t1	(pident:65.657) CAB3224798.1 unnamed protein product [Arctia plantaginis]	(pident:44.38) unnamed protein product [Arctia plantaginis]	(pident:43.43) reverse transcriptase family protein [Acinetobacter baumannii]	(pident:35.023) Full=Probable RNA-directed DNA polymerase from transposon X-element; AltName: Full=Reverse transcriptase [Drosophila melanogaster]	Null	IPR043502(DNA/RNA polymerase superfamily),IPR000477(Reverse transcriptase domain)	PF00078(Reverse transcriptase (RNA-dependent DNA polymerase))	Null	Null	Null	Null	Null	Null	TRINITY_GG_890_c0_g1_i1
g14893.t1	(pident:51.397) XP_026741398.1 uncharacterized protein LOC113503567 [Trichoplusia ni]	(pident:51.76) uncharacterized protein LOC113503567 [Trichoplusia ni]	(pident:48.10) endonuclease/exonuclease/phosphatase family protein, partial [Acinetobacter baumannii]	Null	GO:0003676(nucleic acid binding), GO:0003824(catalytic activity), GO:0008270(zinc ion binding)	IPR036875(Zinc finger, CCHC-type superfamily),IPR036691(Endonuclease/exonuclease/phosphatase superfamily),IPR005135(Endonuclease/exonuclease/phosphatase),IPR001878(Zinc finger, CCHC-type)	PF00098(Zinc knuckle), PF03372(Endonuclease/Exonuclease/phosphatase family)	Null	Null	Null	Null	cpo155670.1 Retrovirus-related Pol polyprotein from type-1 retrotransposable element R1 4 (Fragment) OS=Nasonia vitripennis OX=7425 PE=4 SV=1	Null	TRINITY_GG_890_c0_g1_i1
g14898.t1	(pident:57.171) CAB3223826.1 unnamed protein product [Arctia plantaginis]	(pident:56.33) unnamed protein product [Arctia plantaginis]	(pident:56.60) endonuclease/exonuclease/phosphatase family protein [Pseudomonas aeruginosa]	(pident:28.012) Full=Retrovirus-related Pol polyprotein from type-1 retrotransposable element R1; AltName: Full=Retrovirus-related Pol polyprotein from type I retrotransposable element R1; Includes: Full=Reverse transcriptase; Includes: Full=Endonuclease [Bradysia coprophila]	GO:0003824(catalytic activity)	IPR043502(DNA/RNA polymerase superfamily),IPR036691(Endonuclease/exonuclease/phosphatase superfamily),IPR005135(Endonuclease/exonuclease/phosphatase),IPR000477(Reverse transcriptase domain)	PF00078(Reverse transcriptase (RNA-dependent DNA polymerase)), PF14529(Endonuclease-reverse transcriptase)	Null	Null	Null	Null	Aper007149.1 Probable RNA-directed DNA polymerase from transposon BS OS=Drosophila melanogaster OX=7227 GN=RTase PE=2 SV=1	Null	TRINITY_GG_890_c0_g1_i1
g14904.t1	(pident:57.700) CAB3223826.1 unnamed protein product [Arctia plantaginis]	(pident:56.92) unnamed protein product [Arctia plantaginis]	(pident:56.26) endonuclease/exonuclease/phosphatase family protein [Pseudomonas aeruginosa]	(pident:27.389) Full=Retrovirus-related Pol polyprotein from type-1 retrotransposable element R1; AltName: Full=Retrovirus-related Pol polyprotein from type I retrotransposable element R1; Includes: Full=Reverse transcriptase; Includes: Full=Endonuclease [Bradysia coprophila]	GO:0003824(catalytic activity)	IPR043502(DNA/RNA polymerase superfamily),IPR036691(Endonuclease/exonuclease/phosphatase superfamily),IPR005135(Endonuclease/exonuclease/phosphatase),IPR000477(Reverse transcriptase domain)	PF00078(Reverse transcriptase (RNA-dependent DNA polymerase)), PF14529(Endonuclease-reverse transcriptase)	Null	Null	Null	Null	Aper019265.1 Probable RNA-directed DNA polymerase from transposon BS OS=Drosophila melanogaster OX=7227 GN=RTase PE=2 SV=1	Null	TRINITY_GG_890_c0_g1_i1
g14905.t1	(pident:56.615) XP_026321464.1 uncharacterized protein LOC113231118, partial [Hyposmocoma kahamanoa]	(pident:56.92) uncharacterized protein LOC113231118, partial [Hyposmocoma kahamanoa]	(pident:71.04) hypothetical protein, partial [Acinetobacter baumannii]	(pident:28.430) Full=Putative 115 kDa protein in type-1 retrotransposable element R1DM; AltName: Full=ORF 2; AltName: Full=Putative 115 kDa protein in type I retrotransposable element R1DM [Drosophila melanogaster]	GO:0003676(nucleic acid binding), GO:0003824(catalytic activity), GO:0004523(RNA-DNA hybrid ribonuclease activity)	IPR043502(DNA/RNA polymerase superfamily),IPR036691(Endonuclease/exonuclease/phosphatase superfamily),IPR036397(Ribonuclease H superfamily),IPR012337(Ribonuclease H-like superfamily),IPR005135(Endonuclease/exonuclease/phosphatase),IPR002156(Ribonuclease H domain),IPR000477(Reverse transcriptase domain)	PF00075(RNase H), PF00078(Reverse transcriptase (RNA-dependent DNA polymerase)), PF14529(Endonuclease-reverse transcriptase)	Null	1WDU_A Chain A, TRAS1 ORF2p [Bombyx mori] /1WDU_B Chain B, TRAS1 ORF2p [Bombyx mori]	Null	Null	Aips002673.1 Putative 115 kDa protein in type-1 retrotransposable element R1DM OS=Drosophila melanogaster OX=7227 GN=R1A1-element\ORF2 PE=4 SV=1	Null	TRINITY_GG_890_c0_g1_i1
g14909.t1	(pident:57.172) XP_026741398.1 uncharacterized protein LOC113503567 [Trichoplusia ni]	(pident:54.71) uncharacterized protein LOC113503567 [Trichoplusia ni]	(pident:49.02) endonuclease/exonuclease/phosphatase family protein, partial [Acinetobacter baumannii]	(pident:26.454) Full=Putative 115 kDa protein in type-1 retrotransposable element R1DM; AltName: Full=ORF 2; AltName: Full=Putative 115 kDa protein in type I retrotransposable element R1DM [Drosophila melanogaster]	GO:0003824(catalytic activity)	IPR036691(Endonuclease/exonuclease/phosphatase superfamily),IPR005135(Endonuclease/exonuclease/phosphatase)	PF14529(Endonuclease-reverse transcriptase)	Null	Null	Null	Null	Aper020384.1 Probable RNA-directed DNA polymerase from transposon BS OS=Drosophila melanogaster OX=7227 GN=RTase PE=2 SV=1	Null	TRINITY_GG_890_c0_g1_i1
g14910.t1	(pident:57.207) XP_037877375.1 uncharacterized protein LOC119630918, partial [Bombyx mori]	(pident:55.79) hypothetical protein FEC26_18830 [Acinetobacter baumannii]	(pident:55.79) hypothetical protein, partial [Acinetobacter baumannii]	(pident:27.184) Full=Retrovirus-related Pol polyprotein from type-1 retrotransposable element R1 4; AltName: Full=Retrovirus-related Pol polyprotein from type I retrotransposable element R1 4; Includes: Full=Reverse transcriptase; Includes: Full=Endonuclease [Nasonia vitripennis]	Null	Null	Null	Null	Null	Null	Null	Aper005694.1 Putative fatty acyl-CoA reductase CG5065 OS=Drosophila melanogaster OX=7227 GN=CG5065 PE=3 SV=1	Null	TRINITY_GG_890_c0_g1_i1
g14952.t1	(pident:57.752) CAB3223826.1 unnamed protein product [Arctia plantaginis]	(pident:57.84) endonuclease/exonuclease/phosphatase family protein [Pseudomonas aeruginosa]<>hypothetical protein F3G58_31395 [Pseudomonas aeruginosa]	(pident:57.84) endonuclease/exonuclease/phosphatase family protein [Pseudomonas aeruginosa]	(pident:27.743) Full=Retrovirus-related Pol polyprotein from type-1 retrotransposable element R1; AltName: Full=Retrovirus-related Pol polyprotein from type I retrotransposable element R1; Includes: Full=Reverse transcriptase; Includes: Full=Endonuclease [Bradysia coprophila]	GO:0003824(catalytic activity)	IPR043502(DNA/RNA polymerase superfamily),IPR036691(Endonuclease/exonuclease/phosphatase superfamily),IPR005135(Endonuclease/exonuclease/phosphatase),IPR000477(Reverse transcriptase domain)	PF00078(Reverse transcriptase (RNA-dependent DNA polymerase)), PF14529(Endonuclease-reverse transcriptase)	Null	Null	Null	Null	Aper011878.1 Probable RNA-directed DNA polymerase from transposon BS OS=Drosophila melanogaster OX=7227 GN=RTase PE=2 SV=1	Null	TRINITY_GG_890_c0_g1_i1
g15019.t1	Null	Null	Null	Null	Null	Null	Null	Null	Null	Null	Null	Null	Null	TRINITY_GG_890_c0_g1_i1
g15033.t1	Null	Null	Null	Null	Null	Null	Null	Null	Null	Null	Null	Null	Null	TRINITY_GG_890_c0_g1_i1
g15036.t1	(pident:49.755) XP_039761279.1 uncharacterized protein LOC120634612 [Pararge aegeria]	(pident:49.75) uncharacterized protein LOC120634612 [Pararge aegeria]	(pident:42.06) endonuclease/exonuclease/phosphatase family protein [Piscirickettsia salmonis]	Null	GO:0003824(catalytic activity)	IPR036691(Endonuclease/exonuclease/phosphatase superfamily),IPR005135(Endonuclease/exonuclease/phosphatase)	PF14529(Endonuclease-reverse transcriptase)	Null	Null	Null	Null	Null	Null	TRINITY_GG_890_c0_g1_i1
g15365.t1	(pident:58.431) XP_026741398.1 uncharacterized protein LOC113503567 [Trichoplusia ni]	(pident:56.39) uncharacterized protein LOC113503567 [Trichoplusia ni]	(pident:51.53) endonuclease/exonuclease/phosphatase family protein, partial [Acinetobacter baumannii]	(pident:27.389) Full=Putative 115 kDa protein in type-1 retrotransposable element R1DM; AltName: Full=ORF 2; AltName: Full=Putative 115 kDa protein in type I retrotransposable element R1DM [Drosophila melanogaster]	GO:0003824(catalytic activity)	IPR036691(Endonuclease/exonuclease/phosphatase superfamily),IPR005135(Endonuclease/exonuclease/phosphatase)	PF14529(Endonuclease-reverse transcriptase)	Null	Null	Null	Null	Aper020384.1 Probable RNA-directed DNA polymerase from transposon BS OS=Drosophila melanogaster OX=7227 GN=RTase PE=2 SV=1	Null	TRINITY_GG_890_c0_g1_i1
g1555.t1	(pident:57.655) CAB3223826.1 unnamed protein product [Arctia plantaginis]	(pident:57.71) endonuclease/exonuclease/phosphatase family protein [Pseudomonas aeruginosa]<>hypothetical protein F3G58_31395 [Pseudomonas aeruginosa]	(pident:57.71) endonuclease/exonuclease/phosphatase family protein [Pseudomonas aeruginosa]	(pident:28.189) Full=Retrovirus-related Pol polyprotein from type-1 retrotransposable element R1; AltName: Full=Retrovirus-related Pol polyprotein from type I retrotransposable element R1; Includes: Full=Reverse transcriptase; Includes: Full=Endonuclease [Bradysia coprophila]	GO:0003824(catalytic activity)	IPR043502(DNA/RNA polymerase superfamily),IPR036691(Endonuclease/exonuclease/phosphatase superfamily),IPR005135(Endonuclease/exonuclease/phosphatase),IPR000477(Reverse transcriptase domain)	PF00078(Reverse transcriptase (RNA-dependent DNA polymerase)), PF14529(Endonuclease-reverse transcriptase)	Null	Null	Null	Null	Aper007149.1 Probable RNA-directed DNA polymerase from transposon BS OS=Drosophila melanogaster OX=7227 GN=RTase PE=2 SV=1	Null	TRINITY_GG_890_c0_g1_i1
g16051.t1	Null	Null	Null	Null	Null	Null	Null	Null	Null	Null	Null	Null	Null	TRINITY_GG_890_c0_g1_i1
g16162.t1	(pident:57.655) CAB3223826.1 unnamed protein product [Arctia plantaginis]	(pident:57.55) endonuclease/exonuclease/phosphatase family protein [Pseudomonas aeruginosa]<>hypothetical protein F3G58_31395 [Pseudomonas aeruginosa]	(pident:57.55) endonuclease/exonuclease/phosphatase family protein [Pseudomonas aeruginosa]	(pident:27.743) Full=Retrovirus-related Pol polyprotein from type-1 retrotransposable element R1; AltName: Full=Retrovirus-related Pol polyprotein from type I retrotransposable element R1; Includes: Full=Reverse transcriptase; Includes: Full=Endonuclease [Bradysia coprophila]	GO:0003824(catalytic activity)	IPR043502(DNA/RNA polymerase superfamily),IPR036691(Endonuclease/exonuclease/phosphatase superfamily),IPR005135(Endonuclease/exonuclease/phosphatase),IPR000477(Reverse transcriptase domain)	PF00078(Reverse transcriptase (RNA-dependent DNA polymerase)), PF14529(Endonuclease-reverse transcriptase)	Null	Null	Null	Null	Aper011878.1 Probable RNA-directed DNA polymerase from transposon BS OS=Drosophila melanogaster OX=7227 GN=RTase PE=2 SV=1	Null	TRINITY_GG_890_c0_g1_i1
g16594.t1	(pident:41.825) XP_045535743.1 uncharacterized protein LOC106719018 [Papilio machaon]	(pident:48.15) uncharacterized protein LOC113503567 [Trichoplusia ni]	(pident:53.28) endonuclease/exonuclease/phosphatase family protein [Piscirickettsia salmonis]	(pident:29.264) Full=Putative 115 kDa protein in type-1 retrotransposable element R1DM; AltName: Full=ORF 2; AltName: Full=Putative 115 kDa protein in type I retrotransposable element R1DM [Drosophila melanogaster]	GO:0003676(nucleic acid binding), GO:0003824(catalytic activity), GO:0008270(zinc ion binding)	IPR043502(DNA/RNA polymerase superfamily),IPR036875(Zinc finger, CCHC-type superfamily),IPR036691(Endonuclease/exonuclease/phosphatase superfamily),IPR005135(Endonuclease/exonuclease/phosphatase),IPR001878(Zinc finger, CCHC-type),IPR000629(ATP-dependent RNA helicase DEAD-box, conserved site),IPR000477(Reverse transcriptase domain)	PF00078(Reverse transcriptase (RNA-dependent DNA polymerase)), PF00098(Zinc knuckle), PF14529(Endonuclease-reverse transcriptase)	Null	Null	Null	Null	Null	Null	TRINITY_GG_890_c0_g1_i1
g17397.t1	(pident:61.988) CAB3224798.1 unnamed protein product [Arctia plantaginis]	(pident:61.76) hypothetical protein B5X24_HaOG204786 [Helicoverpa armigera]	(pident:57.77) reverse transcriptase family protein, partial [Acinetobacter baumannii]	(pident:27.913) Full=Retrovirus-related Pol polyprotein from type-1 retrotransposable element R1; AltName: Full=Retrovirus-related Pol polyprotein from type I retrotransposable element R1; Includes: Full=Reverse transcriptase; Includes: Full=Endonuclease [Bradysia coprophila]	Null	IPR043502(DNA/RNA polymerase superfamily),IPR000477(Reverse transcriptase domain)	PF00078(Reverse transcriptase (RNA-dependent DNA polymerase))	Null	Null	Null	Null	Aper003438.1 Kinesin-like protein KIF19 OS=Mus musculus OX=10090 GN=Kif19 PE=1 SV=2	Null	TRINITY_GG_890_c0_g1_i1
g18537.t1	(pident:55.844) CAB3248307.1 unnamed protein product [Arctia plantaginis]	(pident:56.53) unnamed protein product [Arctia plantaginis]	(pident:54.03) endonuclease/exonuclease/phosphatase family protein [Piscirickettsia salmonis]	(pident:29.597) Full=Putative 115 kDa protein in type-1 retrotransposable element R1DM; AltName: Full=ORF 2; AltName: Full=Putative 115 kDa protein in type I retrotransposable element R1DM [Drosophila melanogaster]	GO:0003676(nucleic acid binding), GO:0003824(catalytic activity), GO:0008270(zinc ion binding)	IPR043502(DNA/RNA polymerase superfamily),IPR036875(Zinc finger, CCHC-type superfamily),IPR036691(Endonuclease/exonuclease/phosphatase superfamily),IPR005135(Endonuclease/exonuclease/phosphatase),IPR001878(Zinc finger, CCHC-type),IPR000477(Reverse transcriptase domain)	PF00078(Reverse transcriptase (RNA-dependent DNA polymerase)), PF00098(Zinc knuckle), PF14529(Endonuclease-reverse transcriptase)	Null	Null	Null	Null	Aper020384.1 Probable RNA-directed DNA polymerase from transposon BS OS=Drosophila melanogaster OX=7227 GN=RTase PE=2 SV=1	Null	TRINITY_GG_890_c0_g1_i1
g19689.t1	(pident:46.466) XP_045535743.1 uncharacterized protein LOC106719018 [Papilio machaon]	(pident:51.36) uncharacterized protein LOC113503567 [Trichoplusia ni]	(pident:55.33) endonuclease/exonuclease/phosphatase family protein [Piscirickettsia salmonis]	(pident:28.502) Full=Putative 115 kDa protein in type-1 retrotransposable element R1DM; AltName: Full=ORF 2; AltName: Full=Putative 115 kDa protein in type I retrotransposable element R1DM [Drosophila melanogaster]	GO:0003676(nucleic acid binding), GO:0003824(catalytic activity), GO:0008270(zinc ion binding)	IPR043502(DNA/RNA polymerase superfamily),IPR036875(Zinc finger, CCHC-type superfamily),IPR036691(Endonuclease/exonuclease/phosphatase superfamily),IPR005135(Endonuclease/exonuclease/phosphatase),IPR001878(Zinc finger, CCHC-type),IPR000477(Reverse transcriptase domain)	PF00078(Reverse transcriptase (RNA-dependent DNA polymerase)), PF00098(Zinc knuckle), PF14529(Endonuclease-reverse transcriptase)	Null	Null	Null	Null	Aper009097.1 Retrovirus-related Pol polyprotein from type-1 retrotransposable element R1 (Fragment) OS=Bradysia coprophila OX=38358 PE=4 SV=1	Null	TRINITY_GG_890_c0_g1_i1
g21074.t1	Null	Null	Null	Null	Null	Null	Null	Null	Null	Null	Null	Null	Null	TRINITY_GG_890_c0_g1_i1
g21076.t1	(pident:62.162) XP_021193317.1 uncharacterized protein LOC110378407 [Helicoverpa armigera]	(pident:62.16) uncharacterized protein LOC110378407 [Helicoverpa armigera]<>hypothetical protein B5X24_HaOG205723 [Helicoverpa armigera]	(pident:62.07) RNAse HI domain-containing protein, partial [Acinetobacter baumannii]	Null	GO:0003676(nucleic acid binding), GO:0004523(RNA-DNA hybrid ribonuclease activity)	IPR036397(Ribonuclease H superfamily),IPR012337(Ribonuclease H-like superfamily),IPR002156(Ribonuclease H domain)	PF00075(RNase H)	Null	Null	Null	Null	Harm011685.1 Putative 115 kDa protein in type-1 retrotransposable element R1DM OS=Drosophila melanogaster OX=7227 GN=R1A1-element\ORF2 PE=4 SV=1	Null	TRINITY_GG_890_c0_g1_i1
g21629.t1	(pident:51.037) XP_026741398.1 uncharacterized protein LOC113503567 [Trichoplusia ni]	(pident:49.95) uncharacterized protein LOC113503567 [Trichoplusia ni]	(pident:53.23) endonuclease/exonuclease/phosphatase family protein, partial [Acinetobacter baumannii]	(pident:28.047) Full=Putative 115 kDa protein in type-1 retrotransposable element R1DM; AltName: Full=ORF 2; AltName: Full=Putative 115 kDa protein in type I retrotransposable element R1DM [Drosophila melanogaster]	GO:0003676(nucleic acid binding), GO:0003824(catalytic activity), GO:0008270(zinc ion binding)	IPR043502(DNA/RNA polymerase superfamily),IPR036875(Zinc finger, CCHC-type superfamily),IPR036691(Endonuclease/exonuclease/phosphatase superfamily),IPR005135(Endonuclease/exonuclease/phosphatase),IPR001878(Zinc finger, CCHC-type),IPR000477(Reverse transcriptase domain)	PF00078(Reverse transcriptase (RNA-dependent DNA polymerase)), PF00098(Zinc knuckle), PF14529(Endonuclease-reverse transcriptase)	Null	Null	Null	Null	Null	Null	TRINITY_GG_890_c0_g1_i1
g2168.t1	(pident:56.360) XP_026741398.1 uncharacterized protein LOC113503567 [Trichoplusia ni]	(pident:56.48) uncharacterized protein LOC113503567 [Trichoplusia ni]	(pident:49.48) endonuclease/exonuclease/phosphatase family protein, partial [Acinetobacter baumannii]	(pident:25.831) Full=Retrovirus-related Pol polyprotein from type-1 retrotransposable element R1; AltName: Full=Retrovirus-related Pol polyprotein from type I retrotransposable element R1; Includes: Full=Reverse transcriptase; Includes: Full=Endonuclease [Bradysia coprophila]	GO:0003676(nucleic acid binding), GO:0003824(catalytic activity), GO:0008270(zinc ion binding)	IPR036875(Zinc finger, CCHC-type superfamily),IPR036691(Endonuclease/exonuclease/phosphatase superfamily),IPR005135(Endonuclease/exonuclease/phosphatase),IPR001878(Zinc finger, CCHC-type)	PF00098(Zinc knuckle), PF14529(Endonuclease-reverse transcriptase)	Null	Null	Null	Null	Aper007149.1 Probable RNA-directed DNA polymerase from transposon BS OS=Drosophila melanogaster OX=7227 GN=RTase PE=2 SV=1	Null	TRINITY_GG_890_c0_g1_i1
g21913.t1	(pident:51.579) XP_026727799.1 uncharacterized protein LOC113493949 [Trichoplusia ni]	(pident:53.95) hypothetical protein F3G14_18735, partial [Acinetobacter baumannii]	(pident:55.43) endonuclease/exonuclease/phosphatase family protein, partial [Pseudomonas aeruginosa]	Null	GO:0003824(catalytic activity)	IPR036691(Endonuclease/exonuclease/phosphatase superfamily),IPR005135(Endonuclease/exonuclease/phosphatase)	PF14529(Endonuclease-reverse transcriptase)	Null	Null	Null	Null	Aper019072.1 Retrovirus-related Pol polyprotein from type-1 retrotransposable element R1 (Fragment) OS=Bradysia coprophila OX=38358 PE=4 SV=1	Null	TRINITY_GG_890_c0_g1_i1
g21922.t1	Null	Null	Null	Null	Null	Null	Null	Null	Null	Null	Null	Null	Null	TRINITY_GG_890_c0_g1_i1
g22424.t1	Null	Null	Null	Null	Null	Null	Null	Null	Null	Null	Null	Null	Null	TRINITY_GG_890_c0_g1_i1
g22429.t1	(pident:57.029) CAB3248307.1 unnamed protein product [Arctia plantaginis]	(pident:46.88) unnamed protein product [Arctia plantaginis]	(pident:46.05) endonuclease/exonuclease/phosphatase family protein [Pseudomonas aeruginosa]	(pident:27.753) Full=Putative 115 kDa protein in type-1 retrotransposable element R1DM; AltName: Full=ORF 2; AltName: Full=Putative 115 kDa protein in type I retrotransposable element R1DM [Drosophila melanogaster]	GO:0003824(catalytic activity)	IPR043502(DNA/RNA polymerase superfamily),IPR036691(Endonuclease/exonuclease/phosphatase superfamily),IPR005135(Endonuclease/exonuclease/phosphatase),IPR000477(Reverse transcriptase domain)	PF00078(Reverse transcriptase (RNA-dependent DNA polymerase)), PF14529(Endonuclease-reverse transcriptase)	Null	Null	Null	Null	Null	Null	TRINITY_GG_890_c0_g1_i1
g22444.t1	(pident:44.070) CAF4951761.1 unnamed protein product [Pieris macdunnoughi]	(pident:47.78) unnamed protein product [Arctia plantaginis]	(pident:45.89) endonuclease/exonuclease/phosphatase family protein [Pseudomonas aeruginosa]	(pident:27.729) Full=Putative 115 kDa protein in type-1 retrotransposable element R1DM; AltName: Full=ORF 2; AltName: Full=Putative 115 kDa protein in type I retrotransposable element R1DM [Drosophila melanogaster]	GO:0003824(catalytic activity)	IPR043502(DNA/RNA polymerase superfamily),IPR036691(Endonuclease/exonuclease/phosphatase superfamily),IPR005135(Endonuclease/exonuclease/phosphatase),IPR000477(Reverse transcriptase domain)	PF00078(Reverse transcriptase (RNA-dependent DNA polymerase)), PF14529(Endonuclease-reverse transcriptase)	Null	Null	Null	Null	Null	Null	TRINITY_GG_890_c0_g1_i1
g22449.t1	(pident:52.203) XP_026727799.1 uncharacterized protein LOC113493949 [Trichoplusia ni]	(pident:54.55) hypothetical protein F3G14_18735, partial [Acinetobacter baumannii]	(pident:54.09) endonuclease/exonuclease/phosphatase family protein, partial [Acinetobacter baumannii]	Null	GO:0003824(catalytic activity)	IPR036691(Endonuclease/exonuclease/phosphatase superfamily),IPR005135(Endonuclease/exonuclease/phosphatase)	PF14529(Endonuclease-reverse transcriptase)	Null	Null	Null	Null	Aper019463.1 Retrovirus-related Pol polyprotein from type-1 retrotransposable element R1 (Fragment) OS=Bradysia coprophila OX=38358 PE=4 SV=1	Null	TRINITY_GG_890_c0_g1_i1
g22557.t1	(pident:54.217) XP_026321641.1 uncharacterized protein LOC113231535 [Hyposmocoma kahamanoa]	(pident:49.64) uncharacterized protein LOC113231535 [Hyposmocoma kahamanoa]	(pident:48.17) endonuclease/exonuclease/phosphatase family protein, partial [Acinetobacter baumannii]	(pident:27.612) Full=Putative 115 kDa protein in type-1 retrotransposable element R1DM; AltName: Full=ORF 2; AltName: Full=Putative 115 kDa protein in type I retrotransposable element R1DM [Drosophila melanogaster]	GO:0003824(catalytic activity)	IPR036691(Endonuclease/exonuclease/phosphatase superfamily),IPR005135(Endonuclease/exonuclease/phosphatase)	PF14529(Endonuclease-reverse transcriptase)	Null	Null	Null	Null	Aper019265.1 Probable RNA-directed DNA polymerase from transposon BS OS=Drosophila melanogaster OX=7227 GN=RTase PE=2 SV=1	Null	TRINITY_GG_890_c0_g1_i1
g22559.t1	Null	Null	Null	Null	Null	Null	Null	Null	Null	Null	Null	Null	Null	TRINITY_GG_890_c0_g1_i1
g22570.t1	Null	Null	Null	Null	Null	Null	Null	Null	Null	Null	Null	Null	Null	TRINITY_GG_890_c0_g1_i1
g22571.t1	(pident:61.270) XP_026741398.1 uncharacterized protein LOC113503567 [Trichoplusia ni]	(pident:56.69) uncharacterized protein LOC113494072 [Trichoplusia ni]	(pident:51.13) endonuclease/exonuclease/phosphatase family protein, partial [Acinetobacter baumannii]	(pident:30.584) Full=Putative 115 kDa protein in type-1 retrotransposable element R1DM; AltName: Full=ORF 2; AltName: Full=Putative 115 kDa protein in type I retrotransposable element R1DM [Drosophila melanogaster]	GO:0003824(catalytic activity)	IPR043502(DNA/RNA polymerase superfamily),IPR036691(Endonuclease/exonuclease/phosphatase superfamily),IPR005135(Endonuclease/exonuclease/phosphatase),IPR000477(Reverse transcriptase domain)	PF00078(Reverse transcriptase (RNA-dependent DNA polymerase)), PF14529(Endonuclease-reverse transcriptase)	Null	Null	Null	Null	Aper009938.1 Probable RNA-directed DNA polymerase from transposon BS OS=Drosophila melanogaster OX=7227 GN=RTase PE=2 SV=1	Null	TRINITY_GG_890_c0_g1_i1
g22573.t1	(pident:34.571) XP_039761322.1 uncharacterized protein LOC120634657 [Pararge aegeria]	(pident:36.67) uncharacterized protein LOC120634116 [Pararge aegeria]	(pident:50.46) hypothetical protein, partial [Acinetobacter baumannii]	Null	Null	Null	Null	Null	Null	Null	Null	Null	Null	TRINITY_GG_890_c0_g1_i1
g22914.t1	(pident:62.295) CAB3224798.1 unnamed protein product [Arctia plantaginis]	(pident:63.98) hypothetical protein B5X24_HaOG204786 [Helicoverpa armigera]	(pident:56.42) reverse transcriptase family protein, partial [Pseudomonas aeruginosa]	(pident:36.283) Full=Probable RNA-directed DNA polymerase from transposon BS; AltName: Full=Reverse transcriptase [Drosophila melanogaster]	Null	IPR043502(DNA/RNA polymerase superfamily),IPR000477(Reverse transcriptase domain)	PF00078(Reverse transcriptase (RNA-dependent DNA polymerase))	Null	Null	Null	Null	Aper018763.1 Probable RNA-directed DNA polymerase from transposon BS OS=Drosophila melanogaster OX=7227 GN=RTase PE=2 SV=1	Null	TRINITY_GG_890_c0_g1_i1
g22920.t1	(pident:63.421) CAB3224798.1 unnamed protein product [Arctia plantaginis]	(pident:60.36) hypothetical protein B5X24_HaOG204786 [Helicoverpa armigera]	(pident:57.65) reverse transcriptase family protein, partial [Acinetobacter baumannii]	(pident:26.817) Full=Retrovirus-related Pol polyprotein from type-1 retrotransposable element R1; AltName: Full=Retrovirus-related Pol polyprotein from type I retrotransposable element R1; Includes: Full=Reverse transcriptase; Includes: Full=Endonuclease [Bradysia coprophila]	Null	IPR043502(DNA/RNA polymerase superfamily),IPR000477(Reverse transcriptase domain)	PF00078(Reverse transcriptase (RNA-dependent DNA polymerase))	Null	Null	Null	Null	Aper009938.1 Probable RNA-directed DNA polymerase from transposon BS OS=Drosophila melanogaster OX=7227 GN=RTase PE=2 SV=1	Null	TRINITY_GG_890_c0_g1_i1
g23024.t1	Null	Null	Null	Null	Null	Null	Null	Null	Null	Null	Null	Null	Null	TRINITY_GG_890_c0_g1_i1
g2377.t1	(pident:49.687) XP_026741398.1 uncharacterized protein LOC113503567 [Trichoplusia ni]	(pident:49.48) uncharacterized protein LOC113503567 [Trichoplusia ni]	(pident:45.05) endonuclease/exonuclease/phosphatase family protein, partial [Acinetobacter baumannii]	(pident:27.823) Full=Retrovirus-related Pol polyprotein from type-1 retrotransposable element R1; AltName: Full=Retrovirus-related Pol polyprotein from type I retrotransposable element R1; Includes: Full=Reverse transcriptase; Includes: Full=Endonuclease [Bradysia coprophila]	GO:0003824(catalytic activity)	IPR036691(Endonuclease/exonuclease/phosphatase superfamily),IPR005135(Endonuclease/exonuclease/phosphatase)	PF14529(Endonuclease-reverse transcriptase)	Null	Null	Null	Null	Null	Null	TRINITY_GG_890_c0_g1_i1
g23792.t1	Null	Null	Null	Null	Null	Null	Null	Null	Null	Null	Null	Null	Null	TRINITY_GG_890_c0_g1_i1
g2384.t1	(pident:53.886) XP_026321641.1 uncharacterized protein LOC113231535 [Hyposmocoma kahamanoa]	(pident:50.63) uncharacterized protein LOC113231535 [Hyposmocoma kahamanoa]	(pident:49.05) endonuclease/exonuclease/phosphatase family protein, partial [Acinetobacter baumannii]	Null	GO:0003824(catalytic activity)	IPR036691(Endonuclease/exonuclease/phosphatase superfamily),IPR005135(Endonuclease/exonuclease/phosphatase)	PF14529(Endonuclease-reverse transcriptase)	Null	Null	Null	Null	Aper016591.1 Putative 115 kDa protein in type-1 retrotransposable element R1DM OS=Drosophila melanogaster OX=7227 GN=R1A1-element\ORF2 PE=4 SV=1	Null	TRINITY_GG_890_c0_g1_i1
g24156.t1	Null	Null	Null	Null	Null	Null	Null	Null	Null	Null	Null	Null	Null	TRINITY_GG_890_c0_g1_i1
g24164.t1	(pident:40.678) XP_039760442.1 uncharacterized protein LOC120634116 [Pararge aegeria]	(pident:43.15) uncharacterized protein LOC120634116 [Pararge aegeria]	(pident:48.12) hypothetical protein, partial [Acinetobacter baumannii]	Null	GO:0003676(nucleic acid binding), GO:0008270(zinc ion binding)	IPR036875(Zinc finger, CCHC-type superfamily),IPR001878(Zinc finger, CCHC-type)	PF00098(Zinc knuckle)	Null	Null	Null	Null	Null	Null	TRINITY_GG_890_c0_g1_i1
g24165.t1	(pident:53.109) XP_032522675.1 uncharacterized protein LOC116774129 [Danaus plexippus plexippus]	(pident:52.59) unnamed protein product [Arctia plantaginis]	(pident:48.84) endonuclease/exonuclease/phosphatase family protein, partial [Acinetobacter baumannii]	Null	GO:0003824(catalytic activity)	IPR036691(Endonuclease/exonuclease/phosphatase superfamily),IPR005135(Endonuclease/exonuclease/phosphatase)	PF14529(Endonuclease-reverse transcriptase)	Null	Null	Null	Null	Aper019463.1 Retrovirus-related Pol polyprotein from type-1 retrotransposable element R1 (Fragment) OS=Bradysia coprophila OX=38358 PE=4 SV=1	Null	TRINITY_GG_890_c0_g1_i1
g24301.t1	(pident:57.699) XP_026741398.1 uncharacterized protein LOC113503567 [Trichoplusia ni]	(pident:55.93) uncharacterized protein LOC113503567 [Trichoplusia ni]	(pident:51.98) endonuclease/exonuclease/phosphatase family protein, partial [Acinetobacter baumannii]	(pident:28.175) Full=Putative 115 kDa protein in type-1 retrotransposable element R1DM; AltName: Full=ORF 2; AltName: Full=Putative 115 kDa protein in type I retrotransposable element R1DM [Drosophila melanogaster]	GO:0003824(catalytic activity)	IPR036691(Endonuclease/exonuclease/phosphatase superfamily),IPR005135(Endonuclease/exonuclease/phosphatase)	PF14529(Endonuclease-reverse transcriptase)	Null	Null	Null	Null	Aper020384.1 Probable RNA-directed DNA polymerase from transposon BS OS=Drosophila melanogaster OX=7227 GN=RTase PE=2 SV=1	Null	TRINITY_GG_890_c0_g1_i1
g2492.t1	(pident:55.432) XP_026741398.1 uncharacterized protein LOC113503567 [Trichoplusia ni]	(pident:55.43) uncharacterized protein LOC113503567 [Trichoplusia ni]	(pident:49.47) endonuclease/exonuclease/phosphatase family protein, partial [Acinetobacter baumannii]	(pident:25.381) Full=Retrovirus-related Pol polyprotein from type-1 retrotransposable element R1; AltName: Full=Retrovirus-related Pol polyprotein from type I retrotransposable element R1; Includes: Full=Reverse transcriptase; Includes: Full=Endonuclease [Bradysia coprophila]	GO:0003824(catalytic activity)	IPR036691(Endonuclease/exonuclease/phosphatase superfamily),IPR005135(Endonuclease/exonuclease/phosphatase)	PF14529(Endonuclease-reverse transcriptase)	Null	Null	Null	Null	Aper011878.1 Probable RNA-directed DNA polymerase from transposon BS OS=Drosophila melanogaster OX=7227 GN=RTase PE=2 SV=1	Null	TRINITY_GG_890_c0_g1_i1
g25577.t1	(pident:58.088) XP_026741398.1 uncharacterized protein LOC113503567 [Trichoplusia ni]	(pident:40.89) unnamed protein product [Arctia plantaginis]	(pident:39.69) endonuclease/exonuclease/phosphatase family protein [Pseudomonas aeruginosa]	(pident:27.846) Full=Retrovirus-related Pol polyprotein from type-1 retrotransposable element R1; AltName: Full=Retrovirus-related Pol polyprotein from type I retrotransposable element R1; Includes: Full=Reverse transcriptase; Includes: Full=Endonuclease [Bradysia coprophila]	GO:0003824(catalytic activity)	IPR036691(Endonuclease/exonuclease/phosphatase superfamily),IPR005135(Endonuclease/exonuclease/phosphatase)	PF14529(Endonuclease-reverse transcriptase)	Null	Null	Null	Null	Null	Null	TRINITY_GG_890_c0_g1_i1
g25978.t1	(pident:61.170) XP_026741398.1 uncharacterized protein LOC113503567 [Trichoplusia ni]	(pident:55.37) hypothetical protein B5X24_HaOG204786 [Helicoverpa armigera]	(pident:51.25) reverse transcriptase family protein, partial [Acinetobacter baumannii]	(pident:28.571) Full=Putative 115 kDa protein in type-1 retrotransposable element R1DM; AltName: Full=ORF 2; AltName: Full=Putative 115 kDa protein in type I retrotransposable element R1DM [Drosophila melanogaster]	Null	IPR043502(DNA/RNA polymerase superfamily),IPR000477(Reverse transcriptase domain)	PF00078(Reverse transcriptase (RNA-dependent DNA polymerase))	Null	Null	Null	Null	Aper009938.1 Probable RNA-directed DNA polymerase from transposon BS OS=Drosophila melanogaster OX=7227 GN=RTase PE=2 SV=1	Null	TRINITY_GG_890_c0_g1_i1
g25979.t1	(pident:58.088) XP_026743665.1 uncharacterized protein LOC113505245 [Trichoplusia ni]	(pident:58.09) uncharacterized protein LOC113505245 [Trichoplusia ni]	(pident:52.32) endonuclease/exonuclease/phosphatase family protein, partial [Acinetobacter baumannii]	Null	GO:0003824(catalytic activity)	IPR036691(Endonuclease/exonuclease/phosphatase superfamily),IPR005135(Endonuclease/exonuclease/phosphatase)	PF14529(Endonuclease-reverse transcriptase)	Null	Null	Null	Null	Harm012825.1 Probable RNA-directed DNA polymerase from transposon BS OS=Drosophila melanogaster OX=7227 GN=RTase PE=2 SV=1	Null	TRINITY_GG_890_c0_g1_i1
g25985.t1	(pident:54.907) XP_026321641.1 uncharacterized protein LOC113231535 [Hyposmocoma kahamanoa]	(pident:52.25) uncharacterized protein LOC113231535 [Hyposmocoma kahamanoa]	(pident:47.95) endonuclease/exonuclease/phosphatase family protein, partial [Acinetobacter baumannii]	(pident:27.273) Full=Putative 115 kDa protein in type-1 retrotransposable element R1DM; AltName: Full=ORF 2; AltName: Full=Putative 115 kDa protein in type I retrotransposable element R1DM [Drosophila melanogaster]	GO:0003824(catalytic activity)	IPR036691(Endonuclease/exonuclease/phosphatase superfamily),IPR005135(Endonuclease/exonuclease/phosphatase)	PF14529(Endonuclease-reverse transcriptase)	Null	Null	Null	Null	Aper020384.1 Probable RNA-directed DNA polymerase from transposon BS OS=Drosophila melanogaster OX=7227 GN=RTase PE=2 SV=1	Null	TRINITY_GG_890_c0_g1_i1
g26217.t1	(pident:46.127) XP_026728011.1 uncharacterized protein LOC113494072 [Trichoplusia ni]	(pident:40.73) uncharacterized protein LOC106719018 [Papilio machaon]	(pident:47.36) endonuclease/exonuclease/phosphatase family protein [Pseudomonas aeruginosa]	(pident:27.317) Full=Putative 115 kDa protein in type-1 retrotransposable element R1DM; AltName: Full=ORF 2; AltName: Full=Putative 115 kDa protein in type I retrotransposable element R1DM [Drosophila melanogaster]	GO:0003676(nucleic acid binding), GO:0003824(catalytic activity), GO:0008270(zinc ion binding)	IPR043502(DNA/RNA polymerase superfamily),IPR036875(Zinc finger, CCHC-type superfamily),IPR036691(Endonuclease/exonuclease/phosphatase superfamily),IPR005135(Endonuclease/exonuclease/phosphatase),IPR001878(Zinc finger, CCHC-type),IPR000477(Reverse transcriptase domain)	PF00078(Reverse transcriptase (RNA-dependent DNA polymerase)), PF14529(Endonuclease-reverse transcriptase)	Null	Null	Null	Null	Null	Null	TRINITY_GG_890_c0_g1_i1
g26218.t1	Null	Null	Null	Null	Null	Null	Null	Null	Null	Null	Null	Null	Null	TRINITY_GG_890_c0_g1_i1
g26220.t1	(pident:57.570) XP_026741398.1 uncharacterized protein LOC113503567 [Trichoplusia ni]	(pident:38.56) unnamed protein product [Arctia plantaginis]	(pident:37.28) endonuclease/exonuclease/phosphatase family protein [Pseudomonas aeruginosa]	(pident:27.138) Full=Putative 115 kDa protein in type-1 retrotransposable element R1DM; AltName: Full=ORF 2; AltName: Full=Putative 115 kDa protein in type I retrotransposable element R1DM [Drosophila melanogaster]	GO:0003824(catalytic activity)	IPR036691(Endonuclease/exonuclease/phosphatase superfamily),IPR005135(Endonuclease/exonuclease/phosphatase)	PF14529(Endonuclease-reverse transcriptase)	Null	Null	Null	Null	Null	Null	TRINITY_GG_890_c0_g1_i1
g26221.t1	Null	Null	Null	Null	Null	Null	Null	Null	Null	Null	Null	Null	Null	TRINITY_GG_890_c0_g1_i1
g26224.t1	(pident:51.885) XP_026741398.1 uncharacterized protein LOC113503567 [Trichoplusia ni]	(pident:48.11) uncharacterized protein LOC113503567 [Trichoplusia ni]	(pident:52.20) endonuclease/exonuclease/phosphatase family protein, partial [Acinetobacter baumannii]	(pident:27.557) Full=Putative 115 kDa protein in type-1 retrotransposable element R1DM; AltName: Full=ORF 2; AltName: Full=Putative 115 kDa protein in type I retrotransposable element R1DM [Drosophila melanogaster]	GO:0003676(nucleic acid binding), GO:0003824(catalytic activity), GO:0008270(zinc ion binding)	IPR043502(DNA/RNA polymerase superfamily),IPR036875(Zinc finger, CCHC-type superfamily),IPR036691(Endonuclease/exonuclease/phosphatase superfamily),IPR005135(Endonuclease/exonuclease/phosphatase),IPR001878(Zinc finger, CCHC-type),IPR000477(Reverse transcriptase domain)	PF00078(Reverse transcriptase (RNA-dependent DNA polymerase)), PF14529(Endonuclease-reverse transcriptase)	Null	Null	Null	Null	Null	Null	TRINITY_GG_890_c0_g1_i1
g26228.t1	Null	Null	Null	Null	Null	Null	Null	Null	Null	Null	Null	Null	Null	TRINITY_GG_890_c0_g1_i1
g26445.t1	(pident:56.132) CAB3248307.1 unnamed protein product [Arctia plantaginis]	(pident:46.59) unnamed protein product [Arctia plantaginis]	(pident:46.15) endonuclease/exonuclease/phosphatase family protein [Pseudomonas aeruginosa]	(pident:27.377) Full=Putative 115 kDa protein in type-1 retrotransposable element R1DM; AltName: Full=ORF 2; AltName: Full=Putative 115 kDa protein in type I retrotransposable element R1DM [Drosophila melanogaster]	GO:0003824(catalytic activity)	IPR043502(DNA/RNA polymerase superfamily),IPR036691(Endonuclease/exonuclease/phosphatase superfamily),IPR005135(Endonuclease/exonuclease/phosphatase),IPR000477(Reverse transcriptase domain)	PF00078(Reverse transcriptase (RNA-dependent DNA polymerase)), PF14529(Endonuclease-reverse transcriptase)	Null	Null	Null	Null	Null	Null	TRINITY_GG_890_c0_g1_i1
g26446.t1	(pident:60.446) XP_026321464.1 uncharacterized protein LOC113231118, partial [Hyposmocoma kahamanoa]	(pident:60.45) uncharacterized protein LOC113231118, partial [Hyposmocoma kahamanoa]	(pident:70.49) hypothetical protein, partial [Acinetobacter baumannii]	(pident:28.345) Full=Putative 115 kDa protein in type-1 retrotransposable element R1DM; AltName: Full=ORF 2; AltName: Full=Putative 115 kDa protein in type I retrotransposable element R1DM [Drosophila melanogaster]	GO:0003676(nucleic acid binding), GO:0004523(RNA-DNA hybrid ribonuclease activity)	IPR043502(DNA/RNA polymerase superfamily),IPR036397(Ribonuclease H superfamily),IPR012337(Ribonuclease H-like superfamily),IPR002156(Ribonuclease H domain),IPR000477(Reverse transcriptase domain)	PF00075(RNase H), PF00078(Reverse transcriptase (RNA-dependent DNA polymerase))	Null	Null	Null	Null	Aips002673.1 Putative 115 kDa protein in type-1 retrotransposable element R1DM OS=Drosophila melanogaster OX=7227 GN=R1A1-element\ORF2 PE=4 SV=1	Null	TRINITY_GG_890_c0_g1_i1
g26749.t1	(pident:58.221) XP_026741398.1 uncharacterized protein LOC113503567 [Trichoplusia ni]	(pident:54.55) uncharacterized protein LOC113503567 [Trichoplusia ni]	(pident:49.81) endonuclease/exonuclease/phosphatase family protein, partial [Acinetobacter baumannii]	(pident:27.679) Full=Putative 115 kDa protein in type-1 retrotransposable element R1DM; AltName: Full=ORF 2; AltName: Full=Putative 115 kDa protein in type I retrotransposable element R1DM [Drosophila melanogaster]	GO:0003824(catalytic activity)	IPR036691(Endonuclease/exonuclease/phosphatase superfamily),IPR005135(Endonuclease/exonuclease/phosphatase)	PF14529(Endonuclease-reverse transcriptase)	Null	Null	Null	Null	Aper020384.1 Probable RNA-directed DNA polymerase from transposon BS OS=Drosophila melanogaster OX=7227 GN=RTase PE=2 SV=1	Null	TRINITY_GG_890_c0_g1_i1
g26756.t1	(pident:55.833) XP_026741398.1 uncharacterized protein LOC113503567 [Trichoplusia ni]	(pident:55.83) uncharacterized protein LOC113503567 [Trichoplusia ni]	(pident:51.12) endonuclease/exonuclease/phosphatase family protein, partial [Acinetobacter baumannii]	(pident:25.694) Full=Retrovirus-related Pol polyprotein from type-1 retrotransposable element R1; AltName: Full=Retrovirus-related Pol polyprotein from type I retrotransposable element R1; Includes: Full=Reverse transcriptase; Includes: Full=Endonuclease [Bradysia coprophila]	GO:0003824(catalytic activity)	IPR036691(Endonuclease/exonuclease/phosphatase superfamily),IPR005135(Endonuclease/exonuclease/phosphatase)	PF14529(Endonuclease-reverse transcriptase)	Null	Null	Null	Null	Aper011878.1 Probable RNA-directed DNA polymerase from transposon BS OS=Drosophila melanogaster OX=7227 GN=RTase PE=2 SV=1	Null	TRINITY_GG_890_c0_g1_i1
g26758.t1	(pident:61.494) XP_032525082.1 uncharacterized protein LOC116776088 [Danaus plexippus plexippus]	(pident:61.49) uncharacterized protein LOC116776088 [Danaus plexippus plexippus]	(pident:56.82) endonuclease/exonuclease/phosphatase family protein, partial [Pseudomonas aeruginosa]	Null	GO:0003824(catalytic activity)	IPR036691(Endonuclease/exonuclease/phosphatase superfamily),IPR005135(Endonuclease/exonuclease/phosphatase)	PF14529(Endonuclease-reverse transcriptase)	Null	Null	Null	Null	Aper019463.1 Retrovirus-related Pol polyprotein from type-1 retrotransposable element R1 (Fragment) OS=Bradysia coprophila OX=38358 PE=4 SV=1	Null	TRINITY_GG_890_c0_g1_i1
[truncated: 39,316 more rows]
[truncated: 1 more columns]

## Sheet: RNAi core common genes
RNAi machinery genes manually curated
Gene model ID	Sp index	protein function	%ident	lenght	mismatch	gapopen	qstart	qend	start	send	E-value	Score	Proteome	Transcriptome
g30765.t1	sp|Q9VHS8|IF4A3_DROME	Eukaryotic initiation factor 4A-III	94.12	391	23	0	15	405	9	399	0.0	733	Null	TRINITY_GG_1527_c2_g1_i10
g20893.t1	sp|Q27268|DX39B_DROME	ATP-dependent RNA helicase WM6; Short=DEAD box protein UAP56	89.44	426	42	2	1	425	1	424	0.0	763	Null	TRINITY_GG_5093_c5_g2_i1
g14168.t1	sp|Q7K3M5|DHX15_DROME	ATP-dependent RNA helicase DHX15 homolog	82.68	739	114	4	1	735	1	729	0.0	1226	Null	TRINITY_GG_3305_c1_g1_i11
g17633.t1	sp|A1Z9L3|DHX8_DROME	ATP-dependent RNA helicase DHX8	78.95	1259	229	12	1	1240	1	1242	0.0	1923	Null	TRINITY_GG_4733_c6_g1_i1
g25086.t1	sp|Q02748|IF4A_DROME	Eukaryotic initiation factor 4A	78.93	394	81	1	29	420	10	403	6e-180	630	Null	TRINITY_GG_3544_c0_g3_i3
[truncated: 138 more rows]
